# Supplementary material for: The Development of Bacteriophage Resistance in Vibrio alginolyticus Depends on a Complex Metabolic Adaptation Strategy
Source: MDPI journal article supplement (doi:10.3390/v13040656), 2021-04-10
Supplement: s1 [file s1]

**Skliros et al., 2020. Table S2.** Primers list of qPCR platform. Primers list, which were used to study relative transcript levels of *Vibrio alginolyticus* strain V1 genes involved in sugar transportation (A), amino acids transportation (B), primers for bacteriophage DNA detection (C) and major biochemical processes and bacterial phage receptors (D).

**A.**

| Primers amplifying genes relative to sugars transportation |                                     |
|------------------------------------------------------------|-------------------------------------|
| Gene                                                       | Primers (R'/F')                     |
| <i>cellB</i>                                               | Reverse-5'-GGATCGCAATACCGTTTCCG-3'  |
|                                                            | Forward-5'-GAGCTGTTCGAATGCATGCT-3'  |
| <i>crr</i>                                                 | Reverse-5'-CTCATTGCGCGAACATGGG-3'   |
|                                                            | Forward-5'-GGCGCAGTCGAAAAGCATAT-3'  |
| <i>fruA</i>                                                | Reverse-5'-ACGAGAAGTGTCGACGCTAG-3'  |
|                                                            | Forward-5'-GACGGAAGCTGACGTTGAAC-3'  |
| <i>ptsG 1</i>                                              | Reverse-5'-GGCAGCACCCACACCTAATA-3'  |
|                                                            | Forward-5'-TGGTAAGGCTCTGATGCTTCC-3' |
| <i>ptsG 2</i>                                              | Reverse-5'-ATCTGGCACGTCTTCGATGT-3'  |
|                                                            | Forward-5'-TGACGCTGGTGCTATCGAAA-3'  |
| <i>ptsN</i>                                                | Reverse-5'-TGATGTCTGCGTCGAATGCT-3'  |
|                                                            | Forward-5'-GAAAACGGCCTTCACACTCG-3'  |
| <i>rbsA</i>                                                | Reverse-5'-AGTGAGTTCATCGCGCTCTG-3'  |
|                                                            | Forward-5'-CAGACTCTGAACTGACCGCT-3'  |
| <i>ptsH</i>                                                | Reverse-5'-CGTCGCTCTGAGGGTAAGAC-3'  |
|                                                            | Forward-5'-TGGGGGCATAGAAAACCTGC-3'  |
| <i>treB</i>                                                | Reverse-5'-ACGCAAGCGAGTTAAACAGT-3'  |
|                                                            | Forward-5'-GCGTCTTATTGAGCTGGTCG-3'  |
| <i>mtlA</i>                                                | Reverse-5'-TTGGTAGCCATCCAGTTGGG-3'  |
|                                                            | Forward-5'-CCAAACATCGGCGCGTTTAT-3'  |

**B.**

| Primers amplifying genes relative to amino acids transportation |                                     |
|-----------------------------------------------------------------|-------------------------------------|
| Gene                                                            | Primers (R'/F')                     |
| <i>metQ</i>                                                     | Reverse-5'-TGTTTTCAAGTAGGCCGCCT-3'  |
|                                                                 | Forward-5'-GGCTTGCTGTGGGTATTCC-3'   |
| <i>metL</i>                                                     | Reverse-5'-GTGCATGTGGTCCAACGTGTC-3' |
|                                                                 | Forward-5'-GGCTTAAGCGCTTGTGGAGA-3'  |
| <i>metN</i>                                                     | Reverse-5'-GTCAACAAAGCGAGCAAGGT-3'  |
|                                                                 | Forward-5'-CACAAGGCGAGCATGTGTTT-3'  |
| <i>azlC 1</i>                                                   | Reverse-5'-TCAATTGCGAATGAGCCTGC-3'  |
|                                                                 | Forward-5'-CACTTGCGATGATGCCTCTG-3'  |
| <i>azlC 2</i>                                                   | Reverse-5'-TTGGGTGAATCCGTTCAG-3'    |
|                                                                 | Forward-5'-ACATCTCAACGCTCCTCCA-3'   |
| <i>artP</i>                                                     | Reverse-5'-TAGTGCATTCGCCAGATCCA-3'  |
|                                                                 | Forward-5'-CGCACCGTTCGAATACATGG-3'  |
| <i>artL</i>                                                     | Reverse-5'-TCATATGCGGCCATAGGTTGT-3' |
|                                                                 | Forward-5'-AAGCAAGGTTTAGCGCTTCG-3'  |
| <i>rhtB 1</i>                                                   | Reverse-5'-GCTGCGCCAATCATTTTTACG-3' |
|                                                                 | Forward-5'-CGGTTGGTATCTCGGCGATT-3'  |
| <i>rhtB 2</i>                                                   | Reverse-5'-AAGGTTTCAAGTAGCCCCAG     |
|                                                                 | Forward-5'-ACGTGGCCACAAGTACAGTT-3'  |
| <i>tcyP</i>                                                     | Reverse-5'-GCCACTGCCTACAATGCCTA-3'  |
|                                                                 | Forward-5'-ACTCATTCACGGTGAAGGCA-3'  |
| <i>hisP</i>                                                     | Reverse-5'-CGGTAGGCGTTTCTAGCAAG-3'  |
|                                                                 | Forward-5'-ATCATTGGCTCTCCGGCTC-3'   |

C.

| Gene Target and amplification size                           | Sequences                                                                |
|--------------------------------------------------------------|--------------------------------------------------------------------------|
| Capsid Protein/ 70bp, Vibrio phage Aphrodite1                | Forward-5'-GCGATCCGTGGTGATACAAC-3'<br>Reverse-5'-TAGTGCGCTTCAACCAACCA-3' |
| <i>MCP</i> , Major Capsid Protein/ 70bp, Vibrio phage phiSt2 | Forward-5'-CGACCAATACGCAGTGAACG-3'<br>Reverse-5'-CACACCTGCGTCCATTTCAG-3' |
| <i>MCP</i> , Major Capsid Protein/ 70bp, Vibrio phage Ares1  | Forward-5'-GCGATCCGTGGTGATACAAC-3'<br>Reverse-5'-TAGTGCGCTTCAACCAACCA-3' |

**D.**

| <b>Primers amplifying genes responsible for major biochemical processes and bacterial phage receptors</b> |                                    |             |                                     |
|-----------------------------------------------------------------------------------------------------------|------------------------------------|-------------|-------------------------------------|
| <i>mdh 2</i>                                                                                              | Forward-5'-TTCAGGGTACTGCAGCTGTT-3' | <i>tolC</i> | Reverse-5'-AGTCGTAACGAGCGTTCGAT-3'  |
|                                                                                                           | Reverse-5'-GAAAGCTGAGTTCCTGCTGC-3' |             | Forward-5'-GTTGATGTACTGGACGCGAC-3'  |
| <i>mdh 1</i>                                                                                              | Forward-5'-GCATGTCGCTTTGGTCTGTC-3' | <i>ompF</i> | Forward-5'-AATAGCACCCGTTAGCAGCT-3'  |
|                                                                                                           | Reverse-5'-CGTAAGCGCACTCAACTACG-3' |             | Reverse-5'-TGCGCTTGGTTACAACGAAG-3'  |
| <i>mdh 3</i>                                                                                              | Forward-5'-TTGAAGTTAAGCACCGCACG-3' | <i>livH</i> | Reverse-5'-CCGAAATGGCCCACTGATG-3'   |
|                                                                                                           | Reverse-5'-CCGCCAAAAGTGTCTGCAAT-3' |             | Forward-5'-AACCAGCAAGTAGCCCAGAG-3'  |
| <i>Ppc</i>                                                                                                | Forward-5'-AGAACTCGAACTCGGCAAGT-3' | <i>livB</i> | Reverse-5'-CCTTTAATTCGAGCCGCTGG-3'  |
|                                                                                                           | Reverse-5'-TTCTACTCCGCCCTTAGGGT-3' |             | Forward-5'-TTCCGCTTGCGGGTACTTA-3'   |
| <i>ald</i>                                                                                                | Forward-5'-TATGGGTCGTTTGCCACTGT-3' | <i>lamB</i> | Reverse-5'-CAGAAGCTAGAGCCAGCAGA-3'  |
|                                                                                                           | Reverse-5'-CGCACCAGCTTGGATAGACA-3' |             | Forward-5'-ACGACGGCGAAGAAAACAAA-3'  |
| <i>agxT</i>                                                                                               | Forward-5'-TTTGTGCATGCGGAAACCTC-3' | <i>btuB</i> | Reverse-5'-GCTAACCGACCAGTCCACTT-3'  |
|                                                                                                           | Reverse-5'-GCTGTTTCGCCAGCTTACTC-3' |             | Forward-5'-GCGTCGCGCTAAAGAAATGT-3'  |
| <i>panD</i>                                                                                               | Forward-5'-AGTGCCACCACGTATGTTGA-3' | <i>murE</i> | Forward-5'-TTGACCATAAAGCGGCGGTA-3'  |
|                                                                                                           | Reverse-5'-GCCGTACATCTCTTCTGCGA-3' |             | Reverse-5'-TTCGCAGCTTGTTGCAAGTT-3'  |
| <i>lysA 1</i>                                                                                             | Forward-5'-TTCCCGCAAGTGTCCTCAA-3'  | <i>pckA</i> | Forward-5'-ATGTTTATTCGCCCCGACGGA-3' |
|                                                                                                           | Reverse-5'-AGTGGCGTTCAACATCAAGC-3' |             | Reverse-5'-TTGCGCCATTCAATTACCACG-3' |
| <i>fdr</i>                                                                                                | Forward-5'-ACAGAGCGTGATGACGTGAA-3' | <i>pykF</i> | Forward-5'-GGACGGTACTGACGCAGTAA-3'  |
|                                                                                                           | Reverse-5'-TACTTGGTGCTGACTCTGGC-3' |             | Reverse-5'-AGTTACCGCTTCAACAGGGT-3'  |
| <i>glA</i>                                                                                                | Forward-5'-GACCCAGGTTTCTTGCCAC-3'  |             |                                     |
|                                                                                                           | Reverse-5'-GAATACCTTTGCCGCCATCG-3' |             |                                     |
| <i>pykA</i>                                                                                               | Forward-5'-GCATTACGCTCGACGCTTAG-3' |             |                                     |
|                                                                                                           | Reverse-5'-TGCTCGTTCGACTTTAGCCA-3' |             |                                     |
| <i>lysA2</i>                                                                                              | Forward-5'-CTTGGGTAAAGATCGCGCAC-3' |             |                                     |
|                                                                                                           | Reverse-5'-ATAGGCACCTGCTGAACGAA-3' |             |                                     |
