# Supplementary material for: The Development of Bacteriophage Resistance in Vibrio alginolyticus Depends on a Complex Metabolic Adaptation Strategy
Source: MDPI journal article supplement (doi:10.3390/v13040656), 2021-04-10
Supplement: s1 [file s1]

**Skliros et al., 2020. Table S1.** Average relative transcript abundances ( $\pm$ SE) of *Vibrio alginolyticus* strain V1 genes and its respective resistant strains to bacteriophages Aphrodite1 (VaAphrodite1),  $\phi$ St2 (VaphiSt2) and Ares1 (VaAres1). **A** for receptors genes, **B** for genes involved in sugar transportation, **C** for genes involved in amino acid transporations, **D** for genes involved in major biochemical processes. Heat maps that appear in Figure 5 of main text correspond to the presented colored values here. *P* value represents t-tests between Control (wild type) and each resistant strain. Statistical significant is represented by bold *P* value. Mean primers' efficiency is also presented in table **E**.

**A.**

| Relative expression levels of phage receptors |             |          |               |             |          |               |             |          |               |             |          |               |
|-----------------------------------------------|-------------|----------|---------------|-------------|----------|---------------|-------------|----------|---------------|-------------|----------|---------------|
|                                               | <i>tolC</i> | $\pm$ SE | <i>P</i>      | <i>ompF</i> | $\pm$ SE | <i>P</i>      | <i>btuB</i> | $\pm$ SE | <i>P</i>      | <i>lamB</i> | $\pm$ SE | <i>P</i>      |
| Control                                       | 0.2925      | 0.0139   | na            | 0.0400      | 0.0039   | na            | 0.1906      | 0.0142   | na            | 5.7379      | 1.2186   | na            |
| VaAphrodite1                                  | 0.6417      | 0.0189   | <b>0.0002</b> | 0.0066      | 0.0002   | <b>0.0023</b> | 0.1164      | 0.0096   | <b>0.0243</b> | 3.6332      | 0.2073   | 0.237         |
| VaphiSt2                                      | 0.5827      | 0.0215   | <b>0.0007</b> | 0.0061      | 0.0008   | <b>0.0023</b> | 0.1214      | 0.0156   | 0.0557        | 0.1063      | 0.0051   | <b>0.0195</b> |
| VaAres1                                       | 0.6088      | 0.0581   | <b>0.0124</b> | 0.0414      | 0.0067   | 0.893         | 0.1775      | 0.0395   | 0.810         | 0.8058      | 0.0373   | <b>0.0298</b> |

**B.**

| Relative transcript levels of genes involved in sugars transportation |               |          |               |               |          |               |             |          |               |             |          |               |
|-----------------------------------------------------------------------|---------------|----------|---------------|---------------|----------|---------------|-------------|----------|---------------|-------------|----------|---------------|
|                                                                       | <i>ptsG 1</i> | $\pm$ SE | <i>P</i>      | <i>ptsG 2</i> | $\pm$ SE | <i>P</i>      | <i>crr</i>  | $\pm$ SE | <i>P</i>      | <i>celB</i> | $\pm$ SE | <i>P</i>      |
| Control                                                               | 0.3775        | 0.0856   | na            | 1.4519        | 0.1877   | na            | 1.6949      | 0.4925   | na            | 0.9120      | 0.0521   | na            |
| VaAphrodite1                                                          | 1.3587        | 0.0258   | <b>0.0036</b> | 0.3239        | 0.0395   | <b>0.0002</b> | 0.2358      | 0.0428   | <b>0.046</b>  | 0.1731      | 0.0516   | <b>0.0004</b> |
| Va $\phi$ St2                                                         | 0.2810        | 0.0994   | 0.428         | 0.6870        | 0.1674   | <b>0.0040</b> | 0.4834      | 0.1204   | <b>0.047</b>  | 0.2966      | 0.0845   | <b>0.0027</b> |
| VaAres1                                                               | 0.2200        | 0.0184   | 0.216         | 0.6007        | 0.0645   | 0.889         | 0.5378      | 0.1469   | 0.0584        | 0.8508      | 0.1208   | 0.686         |
|                                                                       | <i>rbsA</i>   | $\pm$ SE | <i>P</i>      | <i>treB</i>   | $\pm$ SE | <i>P</i>      | <i>mtlA</i> | $\pm$ SE | <i>P</i>      | <i>fruA</i> | $\pm$ SE | <i>P</i>      |
| Control                                                               | 1.5333        | 0.0949   | na            | 1.0427        | 0.1180   | na            | 0.7908      | 0.1704   | na            | 0.3136      | 0.0331   | na            |
| VaAphrodite1                                                          | 0.2333        | 0.0427   | <b>0.002</b>  | 0.1652        | 0.1069   | <b>0.0038</b> | 0.6234      | 0.0468   | 0.482         | 0.1980      | 0.0143   | <b>0.0230</b> |
| Va $\phi$ St2                                                         | 0.5638        | 0.1894   | 0.055         | 0.8708        | 0.0177   | 0.253         | 0.0755      | 0.0490   | <b>0.0301</b> | 0.1924      | 0.0353   | 0.0764        |
| VaAres1                                                               | 0.5664        | 0.1793   | <b>0.048</b>  | 0.6453        | 0.0358   | 0.0580        | 0.7221      | 0.0476   | 0.767         | 0.3474      | 0.0409   | 0.585         |

|               | <i>ptsN</i> | $\pm$ SE | <i>P</i>      | <i>ptsH</i> | $\pm$ SE | <i>P</i>      |
|---------------|-------------|----------|---------------|-------------|----------|---------------|
| Control       | 1.0454      | 0.0709   | na            | 0.7503      | 0.0700   | na            |
| VaAphrodite1  | 0.1212      | 0.0257   | <b>0.0002</b> | 1.0928      | 0.1022   | 0.0604        |
| Va $\phi$ St2 | 0.2781      | 0.1157   | <b>0.0040</b> | 0.2722      | 0.0915   | <b>0.0160</b> |
| VaAres1       | 1.0167      | 0.1654   | 0.889         | 0.5863      | 0.0292   | 0.162         |

C.

| Relative transcript levels of genes involved in amino acids transportation |               |        |               |               |        |          |             |        |               |             |        |               |               |        |                |
|----------------------------------------------------------------------------|---------------|--------|---------------|---------------|--------|----------|-------------|--------|---------------|-------------|--------|---------------|---------------|--------|----------------|
|                                                                            | <i>lysE</i>   | ± SE   | <i>P</i>      | <i>tyrP</i>   | ± SE   | <i>P</i> | <i>metI</i> | ± SE   | <i>P</i>      | <i>metN</i> | ± SE   | <i>P</i>      | <i>metQ</i>   | ± SE   | <i>P</i>       |
| Control                                                                    | 0.6267        | 0.1318 | na            | 0.3810        | 0.1075 | na       | 1.1441      | 0.1223 | na            | 1.2661      | 0.0236 | na            | 0.9026        | 0.1715 | na             |
| VaAphrodite1                                                               | 0.0081        | 0.0031 | <b>0.0186</b> | 0.3319        | 0.0034 | 0.561    | 0.3791      | 0.0692 | <b>0.0017</b> | 0.1174      | 0.0375 | <b>0.0000</b> | 0.1265        | 0.0566 | <b>0.00680</b> |
| Va $\phi$ St2                                                              | 0.6481        | 0.0164 | 0.901         | 0.2690        | 0.0964 | 0.728    | 0.6151      | 0.0431 | <b>0.0094</b> | 0.4308      | 0.1407 | <b>0.0085</b> | 0.5843        | 0.1493 | 0.239          |
| VaAres1                                                                    | 0.5162        | 0.0533 | 0.560         | 0.3636        | 0.0566 | 0.913    | 1.0528      | 0.1392 | 0.668         | 1.2330      | 0.0666 | 0.713         | 0.9403        | 0.0840 | 0.839          |
|                                                                            | <i>rhtB 1</i> | ± SE   | <i>P</i>      | <i>rhtB 2</i> | ± SE   | <i>P</i> | <i>tcyP</i> | ± SE   | <i>P</i>      | <i>hisP</i> | ± SE   | <i>P</i>      | <i>azlC 1</i> | ± SE   | <i>P</i>       |
| Control                                                                    | 0.6020        | 0.0980 | na            | 0.3086        | 0.0481 | na       | 0.4799      | 0.0541 | na            | 0.7633      | 0.0824 | na            | 0.0363        | 0.0025 | na             |
| VaAphrodite1                                                               | 0.2410        | 0.0582 | 0.0570        | 0.3459        | 0.0564 | 0.702    | 0.0723      | 0.0272 | <b>0.0043</b> | 0.3324      | 0.0329 | <b>0.0145</b> | 0.0512        | 0.0027 | <b>0.0298</b>  |
| Va $\phi$ St2                                                              | 0.1928        | 0.0422 | <b>0.0334</b> | 0.3796        | 0.1071 | 0.647    | 0.0931      | 0.0022 | <b>0.0053</b> | 0.2552      | 0.1285 | <b>0.0325</b> | 0.0168        | 0.0006 | <b>0.0035</b>  |
| VaAres1                                                                    | 0.4428        | 0.0289 | 0.298         | 0.2417        | 0.0559 | 0.500    | 0.2172      | 0.0146 | <b>0.0187</b> | 0.5578      | 0.0522 | 0.160         | 0.0344        | 0.0039 | 0.747          |

|               | <i>artP</i>   | ± SE   | <i>P</i>      | <i>artL</i> | ± SE   | <i>P</i>      | <i>livB</i> | ± SE   | <i>P</i>      |
|---------------|---------------|--------|---------------|-------------|--------|---------------|-------------|--------|---------------|
| Control       | 0.0152        | 0.0006 | na            | 0.2992      | 0.0152 | na            | 0.0021      | 0.0003 | na            |
| VaAphrodite1  | 0.0037        | 0.0016 | <b>0.0022</b> | 0.0695      | 0.0207 | <b>0.0006</b> | 0.0009      | 0.0001 | <b>0.0346</b> |
| Va $\phi$ St2 | 0.0119        | 0.0019 | 0.236         | 0.4801      | 0.1178 | 0.279         | 0.0001      | 0.0000 | <b>0.0044</b> |
| VaAres1       | 0.0117        | 0.0040 | 0.510         | 0.1239      | 0.0239 | <b>0.0052</b> | 0.0007      | 0.0001 | <b>0.0155</b> |
|               | <i>azlC 2</i> | ± SE   | <i>P</i>      | <i>livH</i> | ± SE   | <i>P</i>      |             |        |               |
| Control       | 0.0121        | 0.0010 | na            | 0.0107      | 0.0015 | na            |             |        |               |
| VaAphrodite1  | 0.0178        | 0.0024 | 0.152         | 0.0041      | 0.0010 | <b>0.0382</b> |             |        |               |
| Va $\phi$ St2 | 0.0164        | 0.0022 | 0.221         | 0.0017      | 0.0006 | <b>0.0091</b> |             |        |               |
| VaAres1       | 0.0064        | 0.0005 | <b>0.0118</b> | 0.0041      | 0.0002 | <b>0.0211</b> |             |        |               |

### D.

| Relative transcript levels of genes involved in major biochemical processes of the cell |               |        |               |             |        |               |             |        |               |               |        |               |              |        |              |
|-----------------------------------------------------------------------------------------|---------------|--------|---------------|-------------|--------|---------------|-------------|--------|---------------|---------------|--------|---------------|--------------|--------|--------------|
|                                                                                         | <i>ald</i>    | ± SE   | <i>P</i>      | <i>agxT</i> | ± SE   | <i>P</i>      | <i>panD</i> | ± SE   | <i>P</i>      | <i>lysA 2</i> | ± SE   | <i>P</i>      | <i>pykA</i>  | ± SE   | <i>P</i>     |
| Control                                                                                 | 0.5209        | 0.2187 | na            | 0.0365      | 0.0138 | na            | 0.0005      | 0.0002 | na            | 0.1652        | 0.0323 | na            | 0.4902       | 0.1586 | na           |
| VaAphrodite1                                                                            | 1.3178        | 0.0204 | <b>0.0415</b> | 0.0275      | 0.0085 | 0.676         | 0.0001      | 0.0000 | 0.377         | 0.4523        | 0.0637 | <b>0.0304</b> | 0.6395       | 0.2170 | 0.674        |
| VaøSt2                                                                                  | 3.6661        | 0.5307 | <b>0.0110</b> | 0.0143      | 0.0026 | 0.266         | 0.0001      | 0.0000 | 0.330         | 0.5538        | 0.0256 | <b>0.001</b>  | 0.0535       | 0.0051 | 0.127        |
| VaAres1                                                                                 | 0.2191        | 0.0509 | 0.334         | 0.0420      | 0.0054 | 0.776         | 0.0003      | 0.0001 | 0.286         | 1.1338        | 0.1234 | <b>0.003</b>  | 1.4136       | 0.3587 | 0.087        |
|                                                                                         | <i>lysA 1</i> | ± SE   | <i>P</i>      | <i>gltA</i> | ± SE   | <i>P</i>      | <i>murE</i> | ± SE   | <i>P</i>      | <i>ppc</i>    | ± SE   | <i>P</i>      | <i>mdh 1</i> | ± SE   | <i>P</i>     |
| Control                                                                                 | 0.0367        | 0.0034 | na            | 5.0889      | 0.6599 | na            | 0.2192      | 0.0288 | na            | 0.3602        | 0.0903 | na            | 5.4497       | 0.0115 | na           |
| VaAphrodite1                                                                            | 0.0183        | 0.0015 | 0.502         | 6.1671      | 0.7864 | 0.439         | 0.1487      | 0.0122 | 0.140         | 0.1440        | 0.0282 | 0.1620        | 1.6533       | 0.1745 | <b>0.000</b> |
| VaøSt2                                                                                  | 0.0177        | 0.0030 | 0.986         | 0.7964      | 0.2812 | <b>0.0081</b> | 0.1143      | 0.0058 | <b>0.0434</b> | 0.1606        | 0.0317 | 0.1000        | 0.4048       | 0.0654 | <b>0.000</b> |
| VaAres1                                                                                 | 0.0488        | 0.0126 | 0.388         | 4.5747      | 0.6796 | 0.681         | 0.1890      | 0.0157 | 0.494         | 0.2558        | 0.0164 | 0.4060        | 5.5623       | 0.5020 | 0.864        |

|                               | <i>frd</i>   | ± SE   | <i>P</i>      | <i>pykF</i>  | ± SE   | <i>P</i> | <i>pckA</i> | ± SE   | <i>P</i>      |
|-------------------------------|--------------|--------|---------------|--------------|--------|----------|-------------|--------|---------------|
| <b>Control</b>                | 2.8835       | 0.1460 | na            | 1.0785       | 0.1462 | na       | 7.2277      | 0.7000 | na            |
| <b>VaAphrodite1</b>           | 14.1752      | 1.5394 | <b>0.0039</b> | 1.3193       | 0.1288 | 0.370    | 13.2575     | 0.6990 | <b>0.0076</b> |
| <b>Va<math>\phi</math>St2</b> | 0.1669       | 0.0165 | <b>0.0001</b> | 1.4789       | 0.1546 | 0.199    | 0.4540      | 0.1260 | <b>0.0014</b> |
| <b>VaAres1</b>                | 1.7651       | 0.0954 | <b>0.0063</b> | 0.9863       | 0.0656 | 0.663    | 5.5833      | 0.5228 | 0.199         |
|                               | <i>mdh 2</i> | ± SE   | <i>P</i>      | <i>mdh 3</i> | ± SE   | <i>P</i> |             |        |               |
| <b>Control</b>                | 0.4060       | 0.1487 | na            | 0.9289       | 0.2133 | na       |             |        |               |
| <b>VaAphrodite1</b>           | 0.5390       | 0.1245 | 0.605         | 1.0160       | 0.1629 | 0.804    |             |        |               |
| <b>Va<math>\phi</math>St2</b> | 0.6721       | 0.0793 | 0.267         | 0.8036       | 0.0051 | 0.657    |             |        |               |
| <b>VaAres1</b>                | 0.6324       | 0.2170 | 0.521         | 0.6264       | 0.0339 | 0.317    |             |        |               |

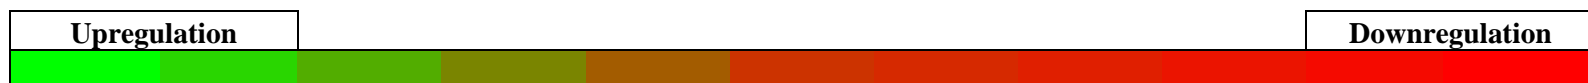

E.

| Gene studied  | Mean of primer's efficiency | Gene studied  | Mean of primer's efficiency | Gene studied | Mean of primer's efficiency |
|---------------|-----------------------------|---------------|-----------------------------|--------------|-----------------------------|
| <i>tolC</i>   | 1.969                       | <i>tcyP</i>   | 1.981                       | <i>pykF</i>  | 1.988                       |
| <i>ompF</i>   | 1.988                       | <i>hisP</i>   | 1.960                       | <i>pckA</i>  | 1.993                       |
| <i>btuB</i>   | 1.988                       | <i>azlC 1</i> | 1.984                       |              |                             |
| <i>lamB</i>   | 1.973                       | <i>azlC 2</i> | 1.981                       |              |                             |
| <i>ptsG 1</i> | 1.913                       | <i>artP</i>   | 1.994                       |              |                             |
| <i>ptsG 2</i> | 1.989                       | <i>artL</i>   | 1.985                       |              |                             |
| <i>crr</i>    | 1.967                       | <i>livB</i>   | 1.832                       |              |                             |
| <i>celB</i>   | 1.981                       | <i>livH</i>   | 1.990                       |              |                             |
| <i>rbsA</i>   | 1.977                       | <i>ald</i>    | 1.980                       |              |                             |
| <i>treB</i>   | 1.994                       | <i>agxT</i>   | 1.985                       |              |                             |
| <i>mtlA</i>   | 1.991                       | <i>panD</i>   | 1.989                       |              |                             |
| <i>fruA</i>   | 1.980                       | <i>lysA 1</i> | 1.991                       |              |                             |
| <i>ptsN</i>   | 1.990                       | <i>lysA 2</i> | 1.982                       |              |                             |
| <i>ptsH</i>   | 1.970                       | <i>pykA</i>   | 1.988                       |              |                             |
| <i>lysE</i>   | 1.952                       | <i>gltA</i>   | 1.994                       |              |                             |
| <i>tyrP</i>   | 1.993                       | <i>murE</i>   | 1.990                       |              |                             |
| <i>metL</i>   | 1.989                       | <i>ppc</i>    | 1.946                       |              |                             |
| <i>metN</i>   | 1.969                       | <i>mdh 1</i>  | 1.992                       |              |                             |
| <i>metQ</i>   | 1.981                       | <i>mdh 2</i>  | 1.976                       |              |                             |
| <i>rhtB 1</i> | 1.956                       | <i>mdh 3</i>  | 1.992                       |              |                             |
| <i>rhtB 2</i> | 1.971                       | <i>frd</i>    | 1.991                       |              |                             |
