# Supplementary material for: The Development of Bacteriophage Resistance in Vibrio alginolyticus Depends on a Complex Metabolic Adaptation Strategy
Source: MDPI journal article supplement (doi:10.3390/v13040656), 2021-04-10
Supplement: s1 [file s1]

**Skliros et al., 2021. Supplemental Table S3. List of polymorphisms that were localized in the 3 respective resistant strains. VaAphrodite1 (A, B, C) VaphiSt2 (A, B) and VaAres1 (A, B, C) for each Contig of the reference strain *Vibrio alginolyticus* strain V1 separately. Variant Frequency and Variant P-value are also provided.**

## Contig 1

| Variant                                      | Name | Minimum | Maximum | Length | Change   | Coverage   | Polymorphism Type  | Variant Frequency | Variant P-Value (approximate) | Amino Acid Change | product              | Protein Effect | protein_id | CDS                      |
|----------------------------------------------|------|---------|---------|--------|----------|------------|--------------------|-------------------|-------------------------------|-------------------|----------------------|----------------|------------|--------------------------|
| Variants: VaAphrodite_B_FDSW210055058-2r     | A    | 141927  | 141927  | 1      | G -> A   | 62         | SNP (transition)   | 25.80%            | 2.70E-42                      | S -> F            | hypothetical protein | Substitution   | KL174194.1 | hypothetical protein CDS |
| Variants: VaAres1_A_FDSW210055060-2r         | A    | 326430  | 326430  | 1      | C -> A   | 83         | SNP (transversion) | 28.90%            | 4.30E-19                      |                   | DNA repair protein   | None           | KL174350.1 | DNA repair protein CDS   |
| Variants: VaphiVaphiSt2_B_A_FDSW210055054-2r | A    | 326430  | 326430  | 1      | C -> A   | 81         | SNP (transversion) | 25.90%            | 2.10E-08                      |                   | DNA repair protein   | None           | KL174350.1 | DNA repair protein CDS   |
| Variants: VaAres1_A_FDSW210055060-2r         | A    | 326447  | 326447  | 1      | T -> A   | 79         | SNP (transversion) | 31.60%            | 1.10E-09                      | I -> N            | DNA repair protein   | Substitution   | KL174350.1 | DNA repair protein CDS   |
| Variants: VaAres1_B_FDSW210055061-2r         | A    | 326447  | 326447  | 1      | T -> A   | 112        | SNP (transversion) | 25.00%            | 3.90E-08                      | I -> N            | DNA repair protein   | Substitution   | KL174350.1 | DNA repair protein CDS   |
| Variants: VaphiVaphiSt2_B_A_FDSW210055054-2r | A    | 326447  | 326447  | 1      | T -> A   | 80         | SNP (transversion) | 26.30%            | 2.80E-10                      | I -> N            | DNA repair protein   | Substitution   | KL174350.1 | DNA repair protein CDS   |
| Variants: VaAres1_B_FDSW210055061-2r         | C    | 326452  | 326452  | 1      | A -> C   | 112        | SNP (transversion) | 25.00%            | 2.50E-10                      |                   | DNA repair protein   | None           | KL174350.1 | DNA repair protein CDS   |
| Variants: VaAres1_A_FDSW210055060-2r         | C    | 326453  | 326453  | 1      | G -> C   | 85         | SNP (transversion) | 30.60%            | 8.00E-12                      | R -> T            | DNA repair protein   | Substitution   | KL174350.1 | DNA repair protein CDS   |
| Variants: VaphiVaphiSt2_B_A_FDSW210055054-2r | C    | 326455  | 326455  | 1      | G -> C   | 84         | SNP (transversion) | 29.80%            | 2.70E-13                      | A -> P            | DNA repair protein   | Substitution   | KL174350.1 | DNA repair protein CDS   |
| Variants: VaAres1_A_FDSW210055060-2r         | C    | 326458  | 326458  | 1      | A -> C   | 89         | SNP (transversion) | 33.70%            | 2.80E-40                      | N -> H            | DNA repair protein   | Substitution   | KL174350.1 | DNA repair protein CDS   |
| Variants: VaphiVaphiSt2_B_A_FDSW210055054-2r | C    | 326458  | 326458  | 1      | A -> C   | 83         | SNP (transversion) | 25.30%            | 1.40E-23                      | N -> H            | DNA repair protein   | Substitution   | KL174350.1 | DNA repair protein CDS   |
| Variants: VaphiVaphiSt2_B_A_FDSW210055054-2r | CT   | 485766  | 485767  | 2      | AC -> CT | 194 -> 195 | Substitution       | 25.1% -> 25.3%    | 1.00E-128                     |                   |                      |                |            |                          |
| Variants: VaAphrodite_B_FDSW210055058-2r     | A    | 485769  | 485769  | 1      | T -> A   | 256        | SNP (transversion) | 28.10%            | 5.20E-152                     |                   |                      |                |            |                          |
| Variants: VaAres1_A_FDSW210055060-2r         | A    | 485769  | 485769  | 1      | T -> A   | 190        | SNP (transversion) | 27.40%            | 5.30E-94                      |                   |                      |                |            |                          |
| Variants: VaAres1_B_FDSW210055061-2r         | A    | 485769  | 485769  | 1      | T -> A   | 201        | SNP (transversion) | 33.30%            | 8.00E-161                     |                   |                      |                |            |                          |
| Variants: VaAres1_C_FDSW210055062-1r         | A    | 485769  | 485769  | 1      | T -> A   | 269        | SNP (transversion) | 29.70%            | 5.00E-155                     |                   |                      |                |            |                          |
| Variants: VaphiVaphiSt2_B_A_FDSW210055054-2r | A    | 485769  | 485769  | 1      | T -> A   | 193        | SNP (transversion) | 34.20%            | 2.40E-159                     |                   |                      |                |            |                          |
| Variants: VaphiSt2_B_FDSW210055056-1r        | A    | 485769  | 485769  | 1      | T -> A   | 397        | SNP (transversion) | 33.50%            | 7.9E-318                      |                   |                      |                |            |                          |
| Variants: VaAphrodite_B_FDSW210055058-2r     | T    | 485773  | 485773  | 1      | A -> T   | 262        | SNP (transversion) | 32.40%            | 7.30E-194                     |                   |                      |                |            |                          |
| Variants: VaAphrodite_C_FDSW210055059-1r     | T    | 485773  | 485773  | 1      | A -> T   | 317        | SNP (transversion) | 26.50%            | 2.80E-191                     |                   |                      |                |            |                          |
| Variants: VaAres1_A_FDSW210055060-2r         | T    | 485773  | 485773  | 1      | A -> T   | 189        | SNP (transversion) | 25.90%            | 3.20E-92                      |                   |                      |                |            |                          |
| Variants: VaAres1_B_FDSW210055061-2r         | T    | 485773  | 485773  | 1      | A -> T   | 214        | SNP (transversion) | 34.60%            | 7.00E-179                     |                   |                      |                |            |                          |
| Variants: VaAres1_C_FDSW210055062-1r         | T    | 485773  | 485773  | 1      | A -> T   | 272        | SNP (transversion) | 32.70%            | 8.60E-168                     |                   |                      |                |            |                          |
| Variants: VaphiVaphiSt2_B_A_FDSW210055054-2r | T    | 485773  | 485773  | 1      | A -> T   | 208        | SNP (transversion) | 34.10%            | 3.30E-171                     |                   |                      |                |            |                          |
| Variants: VaphiSt2_B_FDSW210055056-1r        | T    | 485773  | 485773  | 1      | A -> T   | 401        | SNP (transversion) | 35.70%            | 0                             |                   |                      |                |            |                          |
| Variants: VaAphrodite_C_FDSW210055059-1r     | A    | 485788  | 485788  | 1      | C -> A   | 421        | SNP (transversion) | 25.70%            | 1.90E-254                     |                   |                      |                |            |                          |
| Variants: VaAres1_B_FDSW210055061-2r         | A    | 485788  | 485788  | 1      | C -> A   | 252        | SNP (transversion) | 26.60%            | 2.00E-166                     |                   |                      |                |            |                          |
| Variants: VaAres1_C_FDSW210055062-1r         | A    | 485788  | 485788  | 1      | C -> A   | 364        | SNP (transversion) | 31.30%            | 2.70E-257                     |                   |                      |                |            |                          |
| Variants: VaphiVaphiSt2_B_A_FDSW210055054-2r | A    | 485788  | 485788  | 1      | C -> A   | 263        | SNP (transversion) | 28.10%            | 3.40E-156                     |                   |                      |                |            |                          |

|                                              |   |        |        |   |        |     |                    |        |           |
|----------------------------------------------|---|--------|--------|---|--------|-----|--------------------|--------|-----------|
| Variants: VaphiSt2_B_FDSW210055056-1r        | A | 485788 | 485788 | 1 | C -> A | 511 | SNP (transversion) | 25.20% | 1.20E-289 |
| Variants: VaAphrodite_B_FDSW210055058-2r     | C | 485790 | 485790 | 1 | T -> C | 364 | SNP (transition)   | 26.90% | 1.20E-223 |
| Variants: VaAphrodite_C_FDSW210055059-1r     | C | 485790 | 485790 | 1 | T -> C | 425 | SNP (transition)   | 27.30% | 9.20E-277 |
| Variants: VaAres1_B_FDSW210055061-2r         | C | 485790 | 485790 | 1 | T -> C | 266 | SNP (transition)   | 29.30% | 2.50E-197 |
| Variants: VaAres1_C_FDSW210055062-1r         | C | 485790 | 485790 | 1 | T -> C | 380 | SNP (transition)   | 33.20% | 1.60E-300 |
| Variants: VaphiVaphiSt2_B_A_FDSW210055054-2r | C | 485790 | 485790 | 1 | T -> C | 262 | SNP (transition)   | 27.10% | 7.60E-170 |
| Variants: VaphiSt2_B_FDSW210055056-1r        | C | 485790 | 485790 | 1 | T -> C | 522 | SNP (transition)   | 27.00% | 0         |
| Variants: VaAphrodite_B_FDSW210055058-2r     | G | 485906 | 485906 | 1 | A -> G | 409 | SNP (transition)   | 39.90% | 0         |
| Variants: VaAphrodite_C_FDSW210055059-1r     | G | 485906 | 485906 | 1 | A -> G | 563 | SNP (transition)   | 35.50% | 0         |
| Variants: VaAres1_A_FDSW210055060-2r         | G | 485906 | 485906 | 1 | A -> G | 309 | SNP (transition)   | 30.10% | 2.60E-134 |
| Variants: VaAres1_B_FDSW210055061-2r         | G | 485906 | 485906 | 1 | A -> G | 348 | SNP (transition)   | 37.90% | 1.60E-271 |
| Variants: VaAres1_C_FDSW210055062-1r         | G | 485906 | 485906 | 1 | A -> G | 464 | SNP (transition)   | 42.90% | 0         |
| Variants: VaphiVaphiSt2_B_A_FDSW210055054-2r | G | 485906 | 485906 | 1 | A -> G | 282 | SNP (transition)   | 38.70% | 8.90E-215 |
| Variants: VaphiSt2_B_FDSW210055056-1r        | G | 485906 | 485906 | 1 | A -> G | 534 | SNP (transition)   | 37.60% | 0         |
| Variants: VaAphrodite_B_FDSW210055058-2r     | A | 485920 | 485920 | 1 | G -> A | 346 | SNP (transition)   | 38.40% | 8.50E-288 |
| Variants: VaAphrodite_C_FDSW210055059-1r     | A | 485920 | 485920 | 1 | G -> A | 490 | SNP (transition)   | 38.60% | 0         |
| Variants: VaAres1_A_FDSW210055060-2r         | A | 485920 | 485920 | 1 | G -> A | 287 | SNP (transition)   | 34.10% | 1.90E-128 |
| Variants: VaAres1_B_FDSW210055061-2r         | A | 485920 | 485920 | 1 | G -> A | 286 | SNP (transition)   | 31.10% | 2.40E-174 |
| Variants: VaAres1_C_FDSW210055062-1r         | A | 485920 | 485920 | 1 | G -> A | 396 | SNP (transition)   | 41.90% | 0         |
| Variants: VaphiVaphiSt2_B_A_FDSW210055054-2r | A | 485920 | 485920 | 1 | G -> A | 211 | SNP (transition)   | 46.40% | 2.10E-203 |
| Variants: VaphiSt2_B_FDSW210055056-1r        | A | 485920 | 485920 | 1 | G -> A | 423 | SNP (transition)   | 37.10% | 9.7E-321  |

## Contig 2

| Variant<br>Variants:<br>VaphiVaphi<br>St2_B_A_F<br>DSW210055<br>054-2r | Name           | Minimum | Maximum | Length | Change           | Coverage   | Polymorphism<br>Type      | Variant<br>Frequency | Variant P-<br>Value<br>(approximate<br>) | Amino Acid<br>Change | product                                      | Protein<br>Effect | protein_id | CDS                                                 |
|------------------------------------------------------------------------|----------------|---------|---------|--------|------------------|------------|---------------------------|----------------------|------------------------------------------|----------------------|----------------------------------------------|-------------------|------------|-----------------------------------------------------|
| Variants:<br>VaAres1_B_<br>FDSW21005<br>5061-2r                        | A              | 17346   | 17346   | 1      | C -> A           | 90         | SNP<br>(transversion<br>) | 26.70%               | 8.50E-14                                 |                      | MerR family<br>transcription<br>al regulator | None              | KLI73845.1 | MerR family<br>transcription<br>al regulator<br>CDS |
| Variants:<br>VaAphrodite<br>_C_FDSW2<br>10055059-1r                    | A              | 17362   | 17362   | 1      | C -> A           | 105        | SNP<br>(transversion<br>) | 25.70%               | 1.50E-12                                 | R -> I               | MerR family<br>transcription<br>al regulator | Substitution      | KLI73845.1 | MerR family<br>transcription<br>al regulator<br>CDS |
| Variants:<br>VaphiVaphi<br>St2_B_A_F<br>DSW210055<br>054-2r            | C              | 180730  | 180730  | 1      | A -> C           | 166        | SNP<br>(transversion<br>) | 100.00%              | 0                                        | V -> G               | transcription<br>al regulator                | Substitution      | KLI73980.1 | transcription<br>al regulator<br>CDS                |
| Variants:<br>VaphiSt2_B_<br>_FDSW2100<br>55056-1r                      | C              | 180730  | 180730  | 1      | A -> C           | 183        | SNP<br>(transversion<br>) | 99.50%               | 0                                        | V -> G               | transcription<br>al regulator                | Substitution      | KLI73980.1 | transcription<br>al regulator<br>CDS                |
| Variants:<br>VaAphrodite<br>_C_FDSW2<br>10055059-1r                    | TCCTAGA<br>AAT | 182647  | 182646  | 0      | #NAME?           | 169 -> 170 | Insertion                 | 37.6% -><br>37.9%    | 7.60E-161                                |                      |                                              |                   |            |                                                     |
| Variants:<br>VaAres1_A_<br>FDSW21005<br>5060-2r                        | T              | 188712  | 188712  | 1      | G -> T           | 80         | SNP<br>(transversion<br>) | 30.00%               | 7.70E-09                                 | S -> Y               | membrane<br>protein                          | Substitution      | KLI73986.1 | membrane<br>protein CDS                             |
| Variants:<br>VaphiVaphi<br>St2_B_A_F<br>DSW210055<br>054-2r            | TATA           | 223385  | 223389  | 5      | GGCGC -><br>TATA | 50 -> 51   | Deletion                  | 100.00%              | 1.00E-80                                 |                      |                                              |                   |            |                                                     |
| Variants:<br>VaphiVaphi<br>St2_B_A_F<br>DSW210055<br>054-2r            | A              | 223397  | 223397  | 1      | G -> A           | 49         | SNP<br>(transition)       | 100.00%              | 2.50E-167                                |                      |                                              |                   |            |                                                     |
| Variants:<br>VaphiVaphi<br>St2_B_A_F<br>DSW210055<br>054-2r            | TGT            | 223401  | 223403  | 3      | ACG -><br>TGT    | 49         | Substitution              | 100.00%              | 2.50E-167                                |                      |                                              |                   |            |                                                     |
| Variants:<br>VaphiVaphi<br>St2_B_A_F<br>DSW210055<br>054-2r            |                | 223406  | 223408  | 3      | #NAME?           | 48         | Deletion                  | 100.00%              | 1.60E-77                                 |                      |                                              |                   |            |                                                     |
| Variants:<br>VaphiVaphi<br>St2_B_A_F<br>DSW210055<br>054-2r            | CGC            | 223411  | 223413  | 3      | ATG -><br>CGC    | 48         | Substitution              | 100.00%              | 6.30E-164                                |                      |                                              |                   |            |                                                     |
| Variants:<br>VaphiVaphi<br>St2_B_A_F                                   | CG             | 223418  | 223419  | 2      | TC -> CG         | 41 -> 42   | Substitution              | 100.00%              | 4.00E-140                                |                      |                                              |                   |            |                                                     |

[illegible]

|                                                             |               |        |        |   |                                   |         |                           |                   |          |            |                                    |              |            |                                           |  |  |  |  |  |
|-------------------------------------------------------------|---------------|--------|--------|---|-----------------------------------|---------|---------------------------|-------------------|----------|------------|------------------------------------|--------------|------------|-------------------------------------------|--|--|--|--|--|
| DSW210055<br>054-2r                                         |               |        |        |   |                                   |         |                           |                   |          |            |                                    |              |            |                                           |  |  |  |  |  |
| Variants:<br>VaphiVaphi<br>St2_B_A_F<br>DSW210055<br>054-2r | CTGTG         | 223478 | 223482 | 5 | ACTAT -><br>CTGTG                 | 8 -> 10 | Substitution              | 100.00%           | 1.60E-25 | NY -> TV   | regulator                          | Substitution | KLI74019.1 | regulator<br>CDS                          |  |  |  |  |  |
| Variants:<br>VaphiVaphi<br>St2_B_A_F<br>DSW210055<br>054-2r | GCA           | 223484 | 223486 | 3 | TTT -> GCA                        | 8       | Substitution              | 100.00%           | 4.00E-23 | IF -> SI   | regulator                          | Substitution | KLI74019.1 | regulator<br>CDS                          |  |  |  |  |  |
| Variants:<br>VaphiVaphi<br>St2_B_A_F<br>DSW210055<br>054-2r | AAACAT        | 223489 | 223494 | 5 | CGTGAA -><br>AAACAT               | 3 -> 5  | Substitution              | 100.00%           | 2.50E-07 | RE -> KH   | regulator                          | Substitution | KLI74019.1 | regulator<br>CDS                          |  |  |  |  |  |
| Variants:<br>VaphiVaphi<br>St2_B_A_F<br>DSW210055<br>054-2r | CACCAAT<br>G  | 232698 | 232705 | 8 | TGATTGCA<br>-><br>CACCAAT<br>G    | 4 -> 8  | Substitution              | 75.0% -><br>87.5% | 0.000001 | VIA -> APM | antirepressor                      | Substitution | KLI74031.1 | antirepressor<br>CDS                      |  |  |  |  |  |
| Variants:<br>VaphiVaphi<br>St2_B_A_F<br>DSW210055<br>054-2r | TAATCTTC<br>T | 232707 | 232715 | 9 | GTCCACA<br>GG -><br>TAATCTTC<br>T | 8 -> 11 | Substitution              | 87.5% -><br>90.9% | 5.00E-18 |            | antirepressor                      | Truncation   | KLI74031.1 | antirepressor<br>CDS                      |  |  |  |  |  |
| Variants:<br>VaphiVaphi<br>St2_B_A_F<br>DSW210055<br>054-2r | T             | 232721 | 232721 | 1 | C -> T                            | 14      | SNP<br>(transition)       | 92.90%            | 3.50E-41 |            | antirepressor                      | None         | KLI74031.1 | antirepressor<br>CDS                      |  |  |  |  |  |
| Variants:<br>VaphiVaphi<br>St2_B_A_F<br>DSW210055<br>054-2r |               | 232724 | 232727 | 4 | #NAME?                            | 14      | Deletion                  | 92.90%            | 2.20E-20 |            | antirepressor                      | Frame Shift  | KLI74031.1 | antirepressor<br>CDS                      |  |  |  |  |  |
| Variants:<br>VaphiVaphi<br>St2_B_A_F<br>DSW210055<br>054-2r | T             | 232731 | 232731 | 1 | G -> T                            | 19      | SNP<br>(transversion<br>) | 94.70%            | 4.80E-57 | C -> F     | antirepressor                      | Substitution | KLI74031.1 | antirepressor<br>CDS                      |  |  |  |  |  |
| Variants:<br>VaAres1_A_<br>FDSW21005<br>5060-2r             | T             | 254034 | 254034 | 1 | G -> T                            | 85      | SNP<br>(transversion<br>) | 29.40%            | 2.20E-22 |            | trans-2-<br>enoyl-CoA<br>reductase | Truncation   | KLI74048.1 | trans-2-<br>enoyl-CoA<br>reductase<br>CDS |  |  |  |  |  |
| Variants:<br>VaAres1_A_<br>FDSW21005<br>5060-2r             | T             | 254042 | 254042 | 1 | G -> T                            | 89      | SNP<br>(transversion<br>) | 27.00%            | 4.40E-16 | W -> C     | trans-2-<br>enoyl-CoA<br>reductase | Substitution | KLI74048.1 | trans-2-<br>enoyl-CoA<br>reductase<br>CDS |  |  |  |  |  |
| Variants:<br>VaphiVaphi<br>St2_B_A_F<br>DSW210055<br>054-2r | A             | 254057 | 254057 | 1 | C -> A                            | 83      | SNP<br>(transversion<br>) | 25.30%            | 3.30E-08 |            | trans-2-<br>enoyl-CoA<br>reductase | None         | KLI74048.1 | trans-2-<br>enoyl-CoA<br>reductase<br>CDS |  |  |  |  |  |

### Contig 3

| Variant<br>Variants:                            | Name | Minimum    | Maximum    | Length | Change            | Coverage | Polymorphism<br>Type         | Variant<br>Frequency | Variant P-Value<br>(approximate) | Amino Acid<br>Change | product                                      | Protein<br>Effect | protein<br>_id | CDS                                             |
|-------------------------------------------------|------|------------|------------|--------|-------------------|----------|------------------------------|----------------------|----------------------------------|----------------------|----------------------------------------------|-------------------|----------------|-------------------------------------------------|
| VaAphrodite_A_FDSW2100<br>55057-2r<br>Variants: | TT   | 205<br>71  | 20570      | 0      | (TT)2 -><br>(TT)3 | 152      | Insertion<br>(tandem repeat) | 27.60%               | 3.40E-93                         |                      | glyceraldehyde-3-<br>phosphate dehydrogenase | Frame<br>Shift    | KLI73<br>546.1 | glyceraldehyde-3-phosphate<br>dehydrogenase CDS |
| VaAres1_B_FDSW21005506<br>1-2r                  | A    | 291<br>743 | 29174<br>3 | 1      | C -> A            | 104      | SNP<br>(transversion)        | 25.00%               | 4.30E-14                         |                      | chemotaxis protein CheY                      | None              | KLI73<br>738.1 | chemotaxis protein CheY CDS                     |

## Contig 4

| Variant                                      | Name | Minimum | Maximum | Length | Change     | Coverage   | Polymorphism Type  | Variant Frequency | Variant P-Value (approximate) | Amino Acid Change | product              | Protein Effect | protein_id | CDS                      |
|----------------------------------------------|------|---------|---------|--------|------------|------------|--------------------|-------------------|-------------------------------|-------------------|----------------------|----------------|------------|--------------------------|
| Variants: VaAphrodite_A_FDSW210055057-2r     |      | 94      | 94      | 1      | #NAME?     | 85         | Deletion           | 34.10%            | 6.50E-12                      |                   |                      |                |            |                          |
| Variants: VaAres1_A_FDSW210055060-2r         |      | 94      | 94      | 1      | #NAME?     | 93         | Deletion           | 40.90%            | 7.10E-36                      |                   |                      |                |            |                          |
| Variants: VaAres1_C_FDSW210055062-1r         |      | 94      | 94      | 1      | #NAME?     | 123        | Deletion           | 39.00%            | 1.40E-21                      |                   |                      |                |            |                          |
| Variants: VaAphrodite_A_FDSW210055057-2r     | A    | 98      | 98      | 1      | T -> A     | 84         | (transversion) SNP | 34.50%            | 7.90E-51                      |                   |                      |                |            |                          |
| Variants: VaAres1_A_FDSW210055060-2r         | A    | 98      | 98      | 1      | T -> A     | 85         | (transversion) SNP | 41.20%            | 2.80E-99                      |                   |                      |                |            |                          |
| Variants: VaAres1_C_FDSW210055062-1r         | A    | 98      | 98      | 1      | T -> A     | 119        | (transversion) SNP | 38.70%            | 2.50E-73                      |                   |                      |                |            |                          |
| Variants: VaphiVaphiSt2_B_A_FDSW210055054-2r | A    | 98      | 98      | 1      | T -> A     | 78         | (transversion) SNP | 30.80%            | 9.00E-34                      |                   |                      |                |            |                          |
| Variants: VaAphrodite_A_FDSW210055057-2r     | AGC  | 102     | 104     | 3      | GAG -> AGC | 83         | Substitution       | 30.10%            | 2.90E-42                      |                   |                      |                |            |                          |
| Variants: VaAres1_A_FDSW210055060-2r         | AGC  | 102     | 104     | 3      | GAG -> AGC | 80 -> 81   | Substitution       | 33.8% -> 34.6%    | 1.10E-68                      |                   |                      |                |            |                          |
| Variants: VaAres1_C_FDSW210055062-1r         | AGC  | 102     | 104     | 3      | GAG -> AGC | 123 -> 124 | Substitution       | 29.8% -> 30.1%    | 2.60E-65                      |                   |                      |                |            |                          |
| Variants: VaphiVaphiSt2_B_A_FDSW210055054-2r | AGC  | 102     | 104     | 3      | GAG -> AGC | 78 -> 79   | Substitution       | 26.9% -> 27.8%    | 5.50E-30                      |                   |                      |                |            |                          |
| Variants: VaAphrodite_A_FDSW210055057-2r     | T    | 107     | 107     | 1      | C -> T     | 79         | (transition) SNP   | 27.80%            | 2.90E-45                      |                   |                      |                |            |                          |
| Variants: VaAres1_A_FDSW210055060-2r         | T    | 107     | 107     | 1      | C -> T     | 73         | (transition) SNP   | 30.10%            | 6.30E-55                      |                   |                      |                |            |                          |
| Variants: VaAres1_A_FDSW210055060-2r         | T    | 95321   | 95321   | 1      | G -> T     | 82         | (transversion) SNP | 26.80%            | 8.10E-15                      | T -> N            | membrane protein     | Substitution   | KLI73359.1 | membrane protein CDS     |
| Variants: VaAres1_A_FDSW210055060-2r         | C    | 96286   | 96286   | 1      | A -> C     | 80         | (transversion) SNP | 27.50%            | 4.60E-15                      | N -> H            | membrane protein     | Substitution   | KLI73360.1 | membrane protein CDS     |
| Variants: VaphiVaphiSt2_B_A_FDSW210055054-2r | T    | 192079  | 192079  | 1      | G -> T     | 94         | (transversion) SNP | 26.60%            | 1.50E-16                      | T -> N            | hypothetical protein | Substitution   | KLI73433.1 | hypothetical protein CDS |
| Variants: VaphiVaphiSt2_B_A_FDSW210055054-2r | T    | 192096  | 192096  | 1      | A -> T     | 95         | (transversion) SNP | 29.50%            | 3.50E-12                      | N -> K            | hypothetical protein | Substitution   | KLI73433.1 | hypothetical protein CDS |
| Variants: VaphiVaphiSt2_B_A_FDSW210055054-2r | T    | 192104  | 192104  | 1      | G -> T     | 92         | (transversion) SNP | 30.40%            | 1.50E-12                      |                   | hypothetical protein | None           | KLI73433.1 | hypothetical protein CDS |
| Variants: VaAphrodite_B_FDSW210055058-2r     | A    | 192111  | 192111  | 1      | C -> A     | 108        | (transversion) SNP | 25.90%            | 4.60E-13                      | M -> I            | hypothetical protein | Substitution   | KLI73433.1 | hypothetical protein CDS |
| Variants: VaAres1_B_FDSW210055061-2r         | A    | 192111  | 192111  | 1      | C -> A     | 92         | (transversion) SNP | 26.10%            | 1.50E-07                      | M -> I            | hypothetical protein | Substitution   | KLI73433.1 | hypothetical protein CDS |
| Variants: VaAres1_C_FDSW210055062-1r         | T    | 192120  | 192120  | 1      | G -> T     | 123        | (transversion) SNP | 26.80%            | 3.50E-10                      |                   | hypothetical protein | None           | KLI73433.1 | hypothetical protein CDS |
| Variants: VaAres1_B_FDSW210055061-2r         | A    | 192122  | 192122  | 1      | C -> A     | 95         | (transversion) SNP | 26.30%            | 6.90E-08                      | V -> F            | hypothetical protein | Substitution   | KLI73433.1 | hypothetical protein CDS |
| Variants: VaphiVaphiSt2_B_A_FDSW210055054-2r | A    | 192122  | 192122  | 1      | C -> A     | 95         | (transversion) SNP | 28.40%            | 2.20E-11                      | V -> F            | hypothetical protein | Substitution   | KLI73433.1 | hypothetical protein CDS |
| Variants: VaAres1_A_FDSW210055060-2r         | T    | 272667  | 272667  | 1      | G -> T     | 86         | (transversion) SNP | 25.60%            | 2.30E-16                      |                   |                      |                |            |                          |
| Variants: VaAres1_B_FDSW210055061-2r         | T    | 272667  | 272667  | 1      | G -> T     | 101        | (transversion) SNP | 27.70%            | 2.50E-16                      |                   |                      |                |            |                          |
| Variants: VaphiVaphiSt2_B_A_FDSW210055054-2r | T    | 272667  | 272667  | 1      | G -> T     | 88         | (transversion) SNP | 28.40%            | 2.70E-17                      |                   |                      |                |            |                          |



|                                |   |       |        |   |        |     |                |        |          |        |  |              |            |        |              |
|--------------------------------|---|-------|--------|---|--------|-----|----------------|--------|----------|--------|--|--------------|------------|--------|--------------|
| Variants:                      |   | 28458 |        |   |        |     | SNP            |        |          |        |  | hypothetical |            | KLI734 | hypothetical |
| VaAres1_A_FDSW210055060-2r     | A | 3     | 284583 | 1 | C -> A | 77  | (transversion) | 26.00% | 4.40E-08 |        |  | protein      | None       | 93.1   | protein CDS  |
| Variants:                      |   | 28458 |        |   |        |     | SNP            |        |          |        |  | hypothetical | Substituti | KLI734 | hypothetical |
| VaAres1_A_FDSW210055060-2r     | A | 7     | 284587 | 1 | T -> A | 76  | (transversion) | 27.60% | 1.70E-14 | D -> V |  | protein      | on         | 93.1   | protein CDS  |
| Variants:                      |   | 28459 |        |   |        |     | SNP            |        |          |        |  | hypothetical | Substituti | KLI734 | hypothetical |
| VaAphrodite_B_FDSW210055058-2r | A | 0     | 284590 | 1 | T -> A | 133 | (transversion) | 25.60% | 2.80E-18 | K -> M |  | protein      | on         | 93.1   | protein CDS  |

## Contig 5

| Variant                                     | Name | Minimum | Maximum | Length | Change | Coverage | Polymorphism Type  | Variant Frequency | Variant P-Value (approximate) | Amino Acid Change | product                          | Protein Effect | protein_id  | CDS                                  |
|---------------------------------------------|------|---------|---------|--------|--------|----------|--------------------|-------------------|-------------------------------|-------------------|----------------------------------|----------------|-------------|--------------------------------------|
| Variant: VaAres1_B_FDSW210055061-2r         | C    | 12770   | 12770   | 1      | T -> C | 216      | SNP (transition)   | 25.90%            | 7.20E-150                     |                   | RNA polymerase sigma factor RpoD | None           | KLI731 68.1 | RNA polymerase sigma factor RpoD CDS |
| Variant: VaAres1_B_FDSW210055061-2r         | G    | 12771   | 12771   | 1      | A -> G | 220      | SNP (transition)   | 28.20%            | 2.40E-168                     |                   | RNA polymerase sigma factor RpoD | None           | KLI731 68.1 | RNA polymerase sigma factor RpoD CDS |
| Variant: VaAres1_B_FDSW210055061-2r         | C    | 12771   | 12771   | 1      | T -> C | 222      | SNP (transition)   | 28.80%            | 1.80E-174                     |                   | RNA polymerase sigma factor RpoD | None           | KLI731 68.1 | RNA polymerase sigma factor RpoD CDS |
| Variant: VaAres1_B_FDSW210055061-2r         | A    | 12772   | 12772   | 1      | G -> A | 221      | SNP (transition)   | 33.00%            | 2.60E-189                     |                   | RNA polymerase sigma factor RpoD | None           | KLI731 68.1 | RNA polymerase sigma factor RpoD CDS |
| Variant: VaAres1_B_FDSW210055061-2r         | G    | 12773   | 12773   | 1      | C -> G | 218      | SNP (transversion) | 34.40%            | 4.80E-211                     |                   | RNA polymerase sigma factor RpoD | None           | KLI731 68.1 | RNA polymerase sigma factor RpoD CDS |
| Variant: VaphiVaphiSt2_B_A_FDSW210055054-2r | G    | 12773   | 12773   | 1      | C -> G | 188      | SNP (transversion) | 25.00%            | 1.70E-120                     |                   | RNA polymerase sigma factor RpoD | None           | KLI731 68.1 | RNA polymerase sigma factor RpoD CDS |
| Variant: VaAres1_B_FDSW210055061-2r         | C    | 12773   | 12773   | 1      | T -> C | 220      | SNP (transition)   | 35.90%            | 5.20E-224                     |                   | RNA polymerase sigma factor RpoD | None           | KLI731 68.1 | RNA polymerase sigma factor RpoD CDS |
| Variant: VaphiVaphiSt2_B_A_FDSW210055054-2r | C    | 12773   | 12773   | 1      | T -> C | 185      | SNP (transition)   | 25.90%            | 6.30E-124                     |                   | RNA polymerase sigma factor RpoD | None           | KLI731 68.1 | RNA polymerase sigma factor RpoD CDS |
| Variant: VaAres1_B_FDSW210055061-2r         | G    | 12774   | 12774   | 1      | A -> G | 222      | SNP (transition)   | 37.80%            | 1.90E-240                     |                   | RNA polymerase sigma factor RpoD | None           | KLI731 68.1 | RNA polymerase sigma factor RpoD CDS |
| Variant: VaphiVaphiSt2_B_A_FDSW210055054-2r | G    | 12774   | 12774   | 1      | A -> G | 187      | SNP (transition)   | 27.80%            | 6.30E-136                     |                   | RNA polymerase sigma factor RpoD | None           | KLI731 68.1 | RNA polymerase sigma factor RpoD CDS |
| Variant: VaAres1_B_FDSW210055061-2r         | G    | 12776   | 12776   | 1      | A -> G | 221      | SNP (transition)   | 38.50%            | 4.70E-244                     |                   | RNA polymerase sigma factor RpoD | None           | KLI731 68.1 | RNA polymerase sigma factor RpoD CDS |
| Variant: VaphiVaphiSt2_B_A_FDSW210055054-2r | G    | 12776   | 12776   | 1      | A -> G | 192      | SNP (transition)   | 28.60%            | 5.30E-139                     |                   | RNA polymerase sigma factor RpoD | None           | KLI731 68.1 | RNA polymerase sigma factor RpoD CDS |
| Variant: VaAres1_B_FDSW210055061-2r         | G    | 12776   | 12776   | 1      | A -> G | 220      | SNP (transition)   | 38.60%            | 2.90E-244                     |                   | RNA polymerase sigma factor RpoD | None           | KLI731 68.1 | RNA polymerase sigma factor RpoD CDS |
| Variant: VaphiVaphiSt2_B_A_FDSW210055054-2r | G    | 12776   | 12776   | 1      | A -> G | 193      | SNP (transition)   | 28.50%            | 7.50E-150                     |                   | RNA polymerase sigma factor RpoD | None           | KLI731 68.1 | RNA polymerase sigma factor RpoD CDS |
| Variant: VaAres1_B_FDSW210055061-2r         | C    | 12777   | 12777   | 1      | T -> C | 217      | SNP (transition)   | 39.20%            | 6.70E-245                     |                   | RNA polymerase sigma factor RpoD | None           | KLI731 68.1 | RNA polymerase sigma factor RpoD CDS |
| Variant: VaphiVaphiSt2_B_A_FDSW210055054-2r | C    | 12777   | 12777   | 1      | T -> C | 197      | SNP (transition)   | 27.90%            | 8.80E-144                     |                   | RNA polymerase sigma factor RpoD | None           | KLI731 68.1 | RNA polymerase sigma factor RpoD CDS |
| Variant: VaAres1_B_FDSW210055061-2r         | G    | 12777   | 12777   | 1      | A -> G | 215      | SNP (transition)   | 38.60%            | 8.10E-247                     |                   | RNA polymerase sigma factor RpoD | None           | KLI731 68.1 | RNA polymerase sigma factor RpoD CDS |
| Variant: VaphiVaphiSt2_B_A_FDSW210055054-2r | G    | 12777   | 12777   | 1      | A -> G | 195      | SNP (transition)   | 27.70%            | 2.30E-146                     |                   | RNA polymerase sigma factor RpoD | None           | KLI731 68.1 | RNA polymerase sigma factor RpoD CDS |
| Variant: VaAres1_B_FDSW210055061-2r         | G    | 12778   | 12778   | 1      | T -> G | 213      | SNP (transversion) | 38.00%            | 4.70E-224                     |                   | RNA polymerase sigma factor RpoD | None           | KLI731 68.1 | RNA polymerase sigma factor RpoD CDS |
| Variant: VaphiVaphiSt2_B_A_FDSW210055054-2r | G    | 12778   | 12778   | 1      | T -> G | 198      | SNP (transversion) | 26.80%            | 1.70E-137                     |                   | RNA polymerase sigma factor RpoD | None           | KLI731 68.1 | RNA polymerase sigma factor RpoD CDS |
| Variant: VaAres1_B_FDSW210055061-2r         | C    | 12778   | 12778   | 1      | T -> C | 214      | SNP (transition)   | 35.50%            | 1.60E-207                     |                   | RNA polymerase sigma factor RpoD | None           | KLI731 68.1 | RNA polymerase sigma factor RpoD CDS |
| Variant: VaphiVaphiSt2_B_A_FDSW210055054-2r | C    | 12778   | 12778   | 1      | T -> C | 197      | SNP (transition)   | 25.40%            | 1.80E-123                     |                   | RNA polymerase sigma factor RpoD | None           | KLI731 68.1 | RNA polymerase sigma factor RpoD CDS |
| Variant: VaAres1_B_FDSW210055061-2r         | G    | 12779   | 12779   | 1      | A -> G | 207      | SNP (transition)   | 33.30%            | 3.00E-186                     |                   | RNA polymerase sigma factor RpoD | None           | KLI731 68.1 | RNA polymerase sigma factor RpoD CDS |
| Variant: VaAres1_B_FDSW210055061-2r         | A    | 12780   | 12780   | 1      | G -> A | 206      | SNP (transition)   | 32.50%            | 4.80E-180                     |                   | RNA polymerase sigma factor RpoD | None           | KLI731 68.1 | RNA polymerase sigma factor RpoD CDS |
| Variant: VaAres1_B_FDSW210055061-2r         | G    | 12780   | 12780   | 1      | A -> G | 206      | SNP (transition)   | 32.00%            | 1.90E-183                     |                   | RNA polymerase sigma factor RpoD | None           | KLI731 68.1 | RNA polymerase sigma factor RpoD CDS |

|                            |    |       |       |   |        |                |        |           |                      |        |                      |
|----------------------------|----|-------|-------|---|--------|----------------|--------|-----------|----------------------|--------|----------------------|
| Variables:                 |    | 12781 | 12781 |   |        | SNP            |        |           | RNA polymerase sigma | KLI731 | RNA polymerase sigma |
| VaAres1_B_FDSW210055061-2r | A  | 5     | 5     | 1 | G -> A | (transition)   | 31.40% | 6.70E-157 | factor RpoD          | 68.1   | factor RpoD CDS      |
| Variables:                 |    | 12781 | 12781 |   |        | SNP            |        |           | RNA polymerase sigma | KLI731 | RNA polymerase sigma |
| VaAres1_B_FDSW210055061-2r | G  | 8     | 8     | 1 | C -> G | (transversion) | 30.10% | 1.70E-159 | factor RpoD          | 68.1   | factor RpoD CDS      |
| Variables:                 | GA | 12782 | 12782 |   | CAA -> |                |        |           | RNA polymerase sigma | KLI731 | RNA polymerase sigma |
| VaAres1_B_FDSW210055061-2r | G  | 4     | 6     | 2 | GAG    |                | 26.30% | 1.20E-121 | factor RpoD          | 68.1   | factor RpoD CDS      |
| Variables:                 |    | 12783 | 12783 |   |        | SNP            |        |           | RNA polymerase sigma | KLI731 | RNA polymerase sigma |
| VaAres1_B_FDSW210055061-2r | C  | 3     | 3     | 1 | T -> C | (transition)   | 26.30% | 2.50E-128 | factor RpoD          | 68.1   | factor RpoD CDS      |

## Contig 6

| Variant                                    | Name     | Minimum | Maximum | Length | Change       | Coverage   | Polymorphism Type  | Variant Frequency | Variant P-Value (approximate) | Amino Acid Change | CDS | product | Protein Effect | protein_id |
|--------------------------------------------|----------|---------|---------|--------|--------------|------------|--------------------|-------------------|-------------------------------|-------------------|-----|---------|----------------|------------|
| Variant:<br>VaAphrodite_C_FDSW210055059-1r | A        | 21      | 21      | 1      | T -> A       | 258        | SNP (transversion) | 26.40%            | 3.20E-148                     |                   |     |         |                |            |
| Variant:<br>VaAres1_C_FDSW210055062-1r     | CG       | 276     | 278     | 3      | GAT -> CGC   | 307 -> 314 | Substitution       | 23.7% -> 25.8%    | 2.50E-150                     |                   |     |         |                |            |
| Variant:<br>VaAphrodite_A_FDSW210055057-2r | CC       | 280     | 281     | 2      | AG -> CC     | 284 -> 288 | Substitution       | 27.4% -> 27.8%    | 2.20E-173                     |                   |     |         |                |            |
| Variant:<br>VaAres1_A_FDSW210055060-2r     | CC       | 280     | 281     | 2      | AG -> CC     | 203 -> 205 | Substitution       | 25.1% -> 25.9%    | 1.20E-115                     |                   |     |         |                |            |
| Variant:<br>VaAres1_C_FDSW210055062-1r     | CC       | 280     | 281     | 2      | AG -> CC     | 329 -> 334 | Substitution       | 28.6% -> 29.3%    | 2.80E-189                     |                   |     |         |                |            |
| Variant:<br>VaAphrodite_A_FDSW210055057-2r | TT<br>AT | 283     | 286     | 4      | GAGG -> TTAT | 293 -> 303 | Substitution       | 28.3% -> 29.6%    | 2.40E-188                     |                   |     |         |                |            |
| Variant:<br>VaAres1_A_FDSW210055060-2r     | TT<br>AT | 283     | 286     | 4      | GAGG -> TTAT | 211 -> 213 | Substitution       | 27.0% -> 28.6%    | 6.70E-128                     |                   |     |         |                |            |
| Variant:<br>VaAres1_C_FDSW210055062-1r     | TT<br>AT | 283     | 286     | 4      | GAGG -> TTAT | 346 -> 354 | Substitution       | 31.2% -> 33.1%    | 3.80E-240                     |                   |     |         |                |            |
| Variant:<br>VaAphrodite_A_FDSW210055057-2r | A        | 288     | 288     | 1      | T -> A       | 322        | SNP (transversion) | 32.00%            | 9.00E-234                     |                   |     |         |                |            |
| Variant:<br>VaAres1_A_FDSW210055060-2r     | A        | 288     | 288     | 1      | T -> A       | 228        | SNP (transversion) | 29.80%            | 2.90E-159                     |                   |     |         |                |            |
| Variant:<br>VaAres1_C_FDSW210055062-1r     | A        | 288     | 288     | 1      | T -> A       | 365        | SNP (transversion) | 35.90%            | 8.60E-305                     |                   |     |         |                |            |
| Variant:<br>VaAphrodite_A_FDSW210055057-2r | C        | 293     | 294     | 2      | AG -> C      | 331 -> 332 | Deletion           | 31.0% -> 31.1%    | 2.00E-70                      |                   |     |         |                |            |
| Variant:<br>VaAres1_A_FDSW210055060-2r     | C        | 293     | 294     | 2      | AG -> C      | 235 -> 236 | Deletion           | 28.8% -> 28.9%    | 4.70E-51                      |                   |     |         |                |            |
| Variant:<br>VaAres1_C_FDSW210055062-1r     | C        | 293     | 294     | 2      | AG -> C      | 373 -> 374 | Deletion           | 35.6% -> 35.7%    | 1.90E-100                     |                   |     |         |                |            |
| Variant:<br>VaAphrodite_A_FDSW210055057-2r | T        | 300     | 300     | 1      | G -> T       | 344        | SNP (transversion) | 40.40%            | 0                             |                   |     |         |                |            |
| Variant:<br>VaAres1_A_FDSW210055060-2r     | T        | 300     | 300     | 1      | G -> T       | 248        | SNP (transversion) | 41.10%            | 1.10E-265                     |                   |     |         |                |            |
| Variant:<br>VaAres1_C_FDSW210055062-1r     | T        | 300     | 300     | 1      | G -> T       | 399        | SNP (transversion) | 44.10%            | 0                             |                   |     |         |                |            |
| Variant:<br>VaAphrodite_A_FDSW210055057-2r | T        | 302     | 302     | 1      | C -> T       | 358        | SNP (transition)   | 35.80%            | 2.2E-310                      |                   |     |         |                |            |
| Variant:<br>VaAres1_A_FDSW210055060-2r     | T        | 302     | 302     | 1      | C -> T       | 254        | SNP (transition)   | 35.40%            | 2.50E-227                     |                   |     |         |                |            |
| Variant:<br>VaAres1_C_FDSW210055062-1r     | T        | 302     | 302     | 1      | C -> T       | 409        | SNP (transition)   | 37.40%            | 0                             |                   |     |         |                |            |

|                                                 |         |     |     |   |                |               |                     |                   |           |
|-------------------------------------------------|---------|-----|-----|---|----------------|---------------|---------------------|-------------------|-----------|
| Variants:<br>VaAphrodite_A_FDSW210055057-2r     | GA<br>G | 305 | 308 | 4 | TTTA -><br>GAG | 386 -><br>394 | Deletion            | 32.5% -><br>33.2% | 6.30E-102 |
| Variants:<br>VaAres1_A_FDSW210055060-2r         | GA<br>G | 305 | 308 | 4 | TTTA -><br>GAG | 274 -><br>276 | Deletion            | 32.2% -><br>32.5% | 3.00E-71  |
| Variants:<br>VaAres1_C_FDSW210055062-1r         | GA<br>G | 305 | 308 | 4 | TTTA -><br>GAG | 423 -><br>444 | Deletion            | 34.0% -><br>35.7% | 2.60E-123 |
| Variants:<br>VaAphrodite_A_FDSW210055057-2r     | AA      | 310 | 311 | 2 | CC -> AA       | 414 -><br>421 | Substitution        | 49.2% -><br>49.3% | 0         |
| Variants:<br>VaAphrodite_B_FDSW210055058-2r     | AA      | 310 | 311 | 2 | CC -> AA       | 226 -><br>229 | Substitution        | 27.9% -><br>28.8% | 9.50E-141 |
| Variants:<br>VaAphrodite_C_FDSW210055059-1r     | AA      | 310 | 311 | 2 | CC -> AA       | 373 -><br>379 | Substitution        | 34.8% -><br>35.4% | 0         |
| Variants:<br>VaAres1_A_FDSW210055060-2r         | AA      | 310 | 311 | 2 | CC -> AA       | 286 -><br>289 | Substitution        | 48.6% -><br>49.1% | 0         |
| Variants:<br>VaAres1_B_FDSW210055061-2r         | AA      | 310 | 311 | 2 | CC -> AA       | 259 -><br>269 | Substitution        | 29.3% -><br>30.1% | 1.30E-190 |
| Variants:<br>VaAres1_C_FDSW210055062-1r         | AA      | 310 | 311 | 2 | CC -> AA       | 455 -><br>462 | Substitution        | 48.1% -><br>49.1% | 0         |
| Variants:<br>VaAphrodite_A_FDSW210055057-2r     | T       | 390 | 390 | 1 | C -> T         | 816           | SNP<br>(transition) | 40.60%            | 0         |
| Variants:<br>VaAphrodite_B_FDSW210055058-2r     | T       | 390 | 390 | 1 | C -> T         | 590           | SNP<br>(transition) | 43.70%            | 0         |
| Variants:<br>VaAphrodite_C_FDSW210055059-1r     | T       | 390 | 390 | 1 | C -> T         | 956           | SNP<br>(transition) | 39.10%            | 0         |
| Variants:<br>VaAres1_A_FDSW210055060-2r         | T       | 390 | 390 | 1 | C -> T         | 548           | SNP<br>(transition) | 38.50%            | 0         |
| Variants:<br>VaAres1_B_FDSW210055061-2r         | T       | 390 | 390 | 1 | C -> T         | 685           | SNP<br>(transition) | 46.10%            | 0         |
| Variants:<br>VaAres1_C_FDSW210055062-1r         | T       | 390 | 390 | 1 | C -> T         | 987           | SNP<br>(transition) | 39.60%            | 0         |
| Variants:<br>VaphiVaphiSt2_B_A_FDSW210055054-2r | T       | 390 | 390 | 1 | C -> T         | 377           | SNP<br>(transition) | 45.90%            | 0         |
| Variants:<br>VaAphrodite_B_FDSW210055058-2r     | C       | 397 | 397 | 1 | T -> C         | 597           | SNP<br>(transition) | 30.30%            | 0         |
| Variants:<br>VaAres1_A_FDSW210055060-2r         | C       | 397 | 397 | 1 | T -> C         | 558           | SNP<br>(transition) | 26.30%            | 0         |
| Variants:<br>VaAres1_B_FDSW210055061-2r         | C       | 397 | 397 | 1 | T -> C         | 689           | SNP<br>(transition) | 27.90%            | 0         |
| Variants:<br>VaphiVaphiSt2_B_A_FDSW210055054-2r | C       | 397 | 397 | 1 | T -> C         | 387           | SNP<br>(transition) | 34.10%            | 0         |
| Variants:<br>VaAphrodite_A_FDSW210055057-2r     | T       | 432 | 432 | 1 | C -> T         | 738           | SNP<br>(transition) | 28.00%            | 0         |
| Variants:<br>VaAphrodite_B_FDSW210055058-2r     | T       | 432 | 432 | 1 | C -> T         | 597           | SNP<br>(transition) | 29.10%            | 0         |

|                                                 |   |       |       |   |        |     |                       |        |          |        |                              |                           |                  |                |  |  |  |  |
|-------------------------------------------------|---|-------|-------|---|--------|-----|-----------------------|--------|----------|--------|------------------------------|---------------------------|------------------|----------------|--|--|--|--|
| Variants:<br>VaAres1_A_FDSW210055060-2r         | T | 432   | 432   | 1 | C -> T | 492 | SNP<br>(transition)   | 27.80% |          | 0      |                              |                           |                  |                |  |  |  |  |
| Variants:<br>VaAres1_B_FDSW210055061-2r         | T | 432   | 432   | 1 | C -> T | 691 | SNP<br>(transition)   | 27.10% |          | 0      |                              |                           |                  |                |  |  |  |  |
| Variants:<br>VaAres1_C_FDSW210055062-1r         | T | 432   | 432   | 1 | C -> T | 886 | SNP<br>(transition)   | 25.70% |          | 0      |                              |                           |                  |                |  |  |  |  |
| Variants:<br>VaphiVaphiSt2_B_A_FDSW210055054-2r | T | 432   | 432   | 1 | C -> T | 385 | SNP<br>(transition)   | 32.50% | 9.7E-322 |        |                              |                           |                  |                |  |  |  |  |
| Variants:<br>VaAphrodite_A_FDSW210055057-2r     | C | 437   | 437   | 1 | T -> C | 723 | SNP<br>(transition)   | 52.10% |          | 0      |                              |                           |                  |                |  |  |  |  |
| Variants:<br>VaAphrodite_B_FDSW210055058-2r     | C | 437   | 437   | 1 | T -> C | 601 | SNP<br>(transition)   | 53.20% |          | 0      |                              |                           |                  |                |  |  |  |  |
| Variants:<br>VaAphrodite_C_FDSW210055059-1r     | C | 437   | 437   | 1 | T -> C | 953 | SNP<br>(transition)   | 55.70% |          | 0      |                              |                           |                  |                |  |  |  |  |
| Variants:<br>VaAres1_A_FDSW210055060-2r         | C | 437   | 437   | 1 | T -> C | 478 | SNP<br>(transition)   | 54.40% |          | 0      |                              |                           |                  |                |  |  |  |  |
| Variants:<br>VaAres1_B_FDSW210055061-2r         | C | 437   | 437   | 1 | T -> C | 685 | SNP<br>(transition)   | 49.20% |          | 0      |                              |                           |                  |                |  |  |  |  |
| Variants:<br>VaAres1_C_FDSW210055062-1r         | C | 437   | 437   | 1 | T -> C | 859 | SNP<br>(transition)   | 54.90% |          | 0      |                              |                           |                  |                |  |  |  |  |
| Variants:<br>VaphiVaphiSt2_B_A_FDSW210055054-2r | C | 437   | 437   | 1 | T -> C | 389 | SNP<br>(transition)   | 49.40% |          | 0      |                              |                           |                  |                |  |  |  |  |
| Variants:<br>VaAres1_A_FDSW210055060-2r         | C | 62190 | 62190 | 1 | A -> C | 99  | SNP<br>(transversion) | 27.30% | 6.20E-11 | L -> V | gamma-glutamyl<br>kinase CDS | gamma-<br>glutamyl kinase | Substituti<br>on | KL1729<br>30.1 |  |  |  |  |

## Contig 7

| Variant<br>Name                        | Variant | Minim<br>um | Maxim<br>um | Leng<br>th | Chan<br>ge | Cover<br>age | Polymorphism<br>Type  | Variant<br>Frequency | Variant P-Value<br>(approximate) | Amino Acid<br>Change | CDS                              | product                      | Protein<br>Effect | protein_<br>id |
|----------------------------------------|---------|-------------|-------------|------------|------------|--------------|-----------------------|----------------------|----------------------------------|----------------------|----------------------------------|------------------------------|-------------------|----------------|
| VaphiVaphiSt2_B_A_FDSW2100550<br>54-2r | A       | 11176<br>5  | 111765      | 1          | C -><br>A  | 75           | SNP<br>(transversion) | 25.30%               | 1.50E-07                         |                      | cytoplasmic protein<br>CDS       | cytoplasmic<br>protein       | None              | KLI727<br>81.1 |
| VaphiVaphiSt2_B_A_FDSW210055061-2r     | A       | 18887<br>0  | 188870      | 1          | C -><br>A  | 95           | SNP<br>(transversion) | 100.00%              | 0                                | G -> V               | prop expression<br>regulator CDS | prop expression<br>regulator | Substituti<br>on  | KLI728<br>45.1 |
| VaphiVaphiSt2_B_A_FDSW2100550<br>54-2r | G       | 21695<br>1  | 216951      | 1          | A -><br>G  | 119          | SNP<br>(transition)   | 28.60%               | 5.90E-36                         |                      | calcium-binding<br>protein CDS   | calcium-binding<br>protein   | None              | KLI728<br>68.1 |
| VaphiVaphiSt2_B_A_FDSW210055057-2r     | A       | 21695<br>7  | 216957      | 1          | G -><br>A  | 200          | SNP<br>(transition)   | 27.00%               | 1.20E-54                         |                      | calcium-binding<br>protein CDS   | calcium-binding<br>protein   | None              | KLI728<br>68.1 |
| VaphiVaphiSt2_B_A_FDSW210055057-2r     | G       | 21697<br>5  | 216975      | 1          | A -><br>G  | 200          | SNP<br>(transition)   | 28.50%               | 4.30E-59                         |                      | calcium-binding<br>protein CDS   | calcium-binding<br>protein   | None              | KLI728<br>68.1 |
| VaphiVaphiSt2_B_A_FDSW2100550<br>54-2r | A       | 21697<br>8  | 216978      | 1          | G -><br>A  | 137          | SNP<br>(transition)   | 40.10%               | #####                            |                      | calcium-binding<br>protein CDS   | calcium-binding<br>protein   | None              | KLI728<br>68.1 |
| VaphiVaphiSt2_B_A_FDSW210055057-2r     | C       | 21699<br>0  | 216990      | 1          | T -><br>C  | 209          | SNP<br>(transition)   | 45.50%               | #####                            |                      | calcium-binding<br>protein CDS   | calcium-binding<br>protein   | None              | KLI728<br>68.1 |
| VaphiVaphiSt2_B_A_FDSW2100550<br>54-2r | C       | 21699<br>0  | 216990      | 1          | T -><br>C  | 133          | SNP<br>(transition)   | 62.40%               | #####                            |                      | calcium-binding<br>protein CDS   | calcium-binding<br>protein   | None              | KLI728<br>68.1 |
| VaphiVaphiSt2_B_A_FDSW210055056-1r     | C       | 21699<br>0  | 216990      | 1          | T -><br>C  | 237          | SNP<br>(transition)   | 32.10%               | 4.20E-90                         |                      | calcium-binding<br>protein CDS   | calcium-binding<br>protein   | None              | KLI728<br>68.1 |
| VaphiVaphiSt2_B_A_FDSW210055057-2r     | A       | 21699<br>3  | 216993      | 1          | G -><br>A  | 213          | SNP<br>(transition)   | 42.70%               | #####                            |                      | calcium-binding<br>protein CDS   | calcium-binding<br>protein   | None              | KLI728<br>68.1 |
| VaphiVaphiSt2_B_A_FDSW2100550<br>54-2r | A       | 21699<br>3  | 216993      | 1          | G -><br>A  | 141          | SNP<br>(transition)   | 56.70%               | #####                            |                      | calcium-binding<br>protein CDS   | calcium-binding<br>protein   | None              | KLI728<br>68.1 |
| VaphiVaphiSt2_B_A_FDSW210055056-1r     | A       | 21699<br>3  | 216993      | 1          | G -><br>A  | 229          | SNP<br>(transition)   | 25.80%               | 6.20E-64                         |                      | calcium-binding<br>protein CDS   | calcium-binding<br>protein   | None              | KLI728<br>68.1 |
| VaphiVaphiSt2_B_A_FDSW210055057-2r     | C       | 21700<br>2  | 217002      | 1          | A -><br>C  | 231          | SNP<br>(transversion) | 34.60%               | #####                            |                      | calcium-binding<br>protein CDS   | calcium-binding<br>protein   | None              | KLI728<br>68.1 |
| VaphiVaphiSt2_B_A_FDSW210055060-2r     | C       | 21700<br>2  | 217002      | 1          | A -><br>C  | 135          | SNP<br>(transversion) | 25.90%               | 6.50E-56                         |                      | calcium-binding<br>protein CDS   | calcium-binding<br>protein   | None              | KLI728<br>68.1 |
| VaphiVaphiSt2_B_A_FDSW2100550<br>54-2r | C       | 21700<br>2  | 217002      | 1          | A -><br>C  | 167          | SNP<br>(transversion) | 68.90%               | #####                            |                      | calcium-binding<br>protein CDS   | calcium-binding<br>protein   | None              | KLI728<br>68.1 |
| VaphiVaphiSt2_B_A_FDSW210055057-2r     | T       | 21701<br>7  | 217017      | 1          | C -><br>T  | 269          | SNP<br>(transition)   | 50.90%               | #####                            |                      | calcium-binding<br>protein CDS   | calcium-binding<br>protein   | None              | KLI728<br>68.1 |
| VaphiVaphiSt2_B_A_FDSW210055060-2r     | T       | 21701<br>7  | 217017      | 1          | C -><br>T  | 155          | SNP<br>(transition)   | 45.80%               | #####                            |                      | calcium-binding<br>protein CDS   | calcium-binding<br>protein   | None              | KLI728<br>68.1 |
| VaphiVaphiSt2_B_A_FDSW210055061-2r     | T       | 21701<br>7  | 217017      | 1          | C -><br>T  | 130          | SNP<br>(transition)   | 40.80%               | 2.60E-96                         |                      | calcium-binding<br>protein CDS   | calcium-binding<br>protein   | None              | KLI728<br>68.1 |
| VaphiVaphiSt2_B_A_FDSW2100550<br>54-2r | T       | 21701<br>7  | 217017      | 1          | C -><br>T  | 197          | SNP<br>(transition)   | 82.70%               | 0                                |                      | calcium-binding<br>protein CDS   | calcium-binding<br>protein   | None              | KLI728<br>68.1 |
| VaphiVaphiSt2_B_A_FDSW210055056-1r     | T       | 21701<br>7  | 217017      | 1          | C -><br>T  | 251          | SNP<br>(transition)   | 31.10%               | #####                            |                      | calcium-binding<br>protein CDS   | calcium-binding<br>protein   | None              | KLI728<br>68.1 |

## Contig 13

| Variant                                    | Name | Minimum | Maximum | Length | Change #NA | Coverage | Polymorphism Type | Variant Frequency | Variant P-Value (approximate) | Amino Acid Change | CDS                                              | product                                      | Protein Effect | protein_id |
|--------------------------------------------|------|---------|---------|--------|------------|----------|-------------------|-------------------|-------------------------------|-------------------|--------------------------------------------------|----------------------------------------------|----------------|------------|
| Variant:<br>VaphiSt2_B_FDSW210055056-1r    |      | 34441   | 34446   | 6      | ME?        | 271      | Deletion          | 60.50%            | 1.20E-186                     | NIV -> N          | outer membrane protein assembly protein YaeT CDS | outer membrane protein assembly protein YaeT | Deletion       | KL171      |
| Variant:<br>VaAphrodite_B_FDSW210055058-2r | A    | 122350  | 122350  | 1      | G -> A     | 174      | SNP (transition)  | 27.60%            | 8.20E-116                     |                   |                                                  |                                              |                | 940.1      |



## Contig 14

| Variant                                     | Name | Minimum | Maximum | Length | Change     | Coverage   | Polymorphism Type | Variant Frequency | Variant P-Value (approximate) | Amino Acid Change | CDS                      | product                  | Protein Effect       | protein_id |            |
|---------------------------------------------|------|---------|---------|--------|------------|------------|-------------------|-------------------|-------------------------------|-------------------|--------------------------|--------------------------|----------------------|------------|------------|
| Variant: VaAphrodite_A_FDSW210055057-2r     | A    | 7       | 7       | 1      | G -> A     | 388        | SNP (transition)  | 37.10%            |                               | 0                 | hypothetical protein CDS | hypothetical protein     | None                 | KLI71769.1 |            |
| Variant: VaAphrodite_B_FDSW210055058-2r     | A    | 7       | 7       | 1      | G -> A     | 292        | SNP (transition)  | 40.80%            | 5.8E-321                      |                   | hypothetical protein CDS | hypothetical protein     | None                 | KLI71769.1 |            |
| Variant: VaAphrodite_C_FDSW210055059-1r     | A    | 7       | 7       | 1      | G -> A     | 403        | SNP (transition)  | 37.00%            |                               | 0                 | hypothetical protein CDS | hypothetical protein     | None                 | KLI71769.1 |            |
| Variant: VaAres1_A_FDSW210055060-2r         | A    | 7       | 7       | 1      | G -> A     | 267        | SNP (transition)  | 37.50%            | #####                         |                   | hypothetical protein CDS | hypothetical protein     | None                 | KLI71769.1 |            |
| Variant: VaAres1_B_FDSW210055061-2r         | A    | 7       | 7       | 1      | G -> A     | 271        | SNP (transition)  | 42.10%            | 5.8E-321                      |                   | hypothetical protein CDS | hypothetical protein     | None                 | KLI71769.1 |            |
| Variant: VaAres1_C_FDSW210055062-1r         | A    | 7       | 7       | 1      | G -> A     | 428        | SNP (transition)  | 43.70%            |                               | 0                 | hypothetical protein CDS | hypothetical protein     | None                 | KLI71769.1 |            |
| Variant: VaphiVaphiSt2_B_A_FDSW210055054-2r | A    | 7       | 7       | 1      | G -> A     | 228        | SNP (transition)  | 49.10%            | 3.3E-314                      |                   | hypothetical protein CDS | hypothetical protein     | None                 | KLI71769.1 |            |
| Variant: VaphiSt2_B_FDSW210055056-1r        | A    | 7       | 7       | 1      | G -> A     | 509        | SNP (transition)  | 38.70%            |                               | 0                 | hypothetical protein CDS | hypothetical protein     | None                 | KLI71769.1 |            |
| Variant: VaAphrodite_A_FDSW210055057-2r     | GA   | 10      | 12      | 2      | CAC -> GAT | 397 -> 405 | Substitution      | 33.1% -> 33.8%    |                               | 0                 | V -> I                   | hypothetical protein CDS | Substitution         | KLI71769.1 |            |
| Variant: VaAphrodite_B_FDSW210055058-2r     | GA   | 10      | 12      | 2      | CAC -> GAT | 298 -> 299 | Substitution      | 38.8% -> 39.6%    | 9.2E-310                      |                   | V -> I                   | hypothetical protein CDS | Substitution         | KLI71769.1 |            |
| Variant: VaAphrodite_C_FDSW210055059-1r     | GA   | 10      | 12      | 2      | CAC -> GAT | 415 -> 421 | Substitution      | 35.4% -> 36.3%    |                               | 0                 | V -> I                   | hypothetical protein CDS | Substitution         | KLI71769.1 |            |
| Variant: VaAres1_A_FDSW210055060-2r         | GA   | 10      | 12      | 2      | CAC -> GAT | 270 -> 271 | Substitution      | 36.3% -> 36.9%    | #####                         |                   | V -> I                   | hypothetical protein CDS | Substitution         | KLI71769.1 |            |
| Variant: VaAres1_B_FDSW210055061-2r         | GA   | 10      | 12      | 2      | CAC -> GAT | 266 -> 270 | Substitution      | 41.1% -> 41.4%    | #####                         |                   | V -> I                   | hypothetical protein CDS | Substitution         | KLI71769.1 |            |
| Variant: VaAres1_C_FDSW210055062-1r         | GA   | 10      | 12      | 2      | CAC -> GAT | 441 -> 444 | Substitution      | 42.6% -> 43.1%    |                               | 0                 | V -> I                   | hypothetical protein CDS | Substitution         | KLI71769.1 |            |
| Variant: VaphiVaphiSt2_B_A_FDSW210055054-2r | GA   | 10      | 12      | 2      | CAC -> GAT | 235 -> 236 | Substitution      | 45.8% -> 46.0%    | #####                         |                   | V -> I                   | hypothetical protein CDS | Substitution         | KLI71769.1 |            |
| Variant: VaphiSt2_B_FDSW210055056-1r        | GA   | 10      | 12      | 2      | CAC -> GAT | 510 -> 513 | Substitution      | 37.1% -> 37.2%    |                               | 0                 | V -> I                   | hypothetical protein CDS | Substitution         | KLI71769.1 |            |
| Variant: VaAphrodite_A_FDSW210055057-2r     | G    | 22      | 22      | 1      | A -> G     | 418        | SNP (transition)  | 41.60%            |                               | 0                 |                          | hypothetical protein CDS | hypothetical protein | None       | KLI71769.1 |
| Variant: VaAphrodite_B_FDSW210055058-2r     | G    | 22      | 22      | 1      | A -> G     | 317        | SNP (transition)  | 48.60%            |                               | 0                 |                          | hypothetical protein CDS | hypothetical protein | None       | KLI71769.1 |
| Variant: VaAphrodite_C_FDSW210055059-1r     | G    | 22      | 22      | 1      | A -> G     | 429        | SNP (transition)  | 45.00%            |                               | 0                 |                          | hypothetical protein CDS | hypothetical protein | None       | KLI71769.1 |
| Variant: VaAres1_A_FDSW210055060-2r         | G    | 22      | 22      | 1      | A -> G     | 279        | SNP (transition)  | 47.30%            |                               | 0                 |                          | hypothetical protein CDS | hypothetical protein | None       | KLI71769.1 |
| Variant: VaAres1_B_FDSW210055061-2r         | G    | 22      | 22      | 1      | A -> G     | 279        | SNP (transition)  | 50.90%            |                               | 0                 |                          | hypothetical protein CDS | hypothetical protein | None       | KLI71769.1 |
| Variant: VaAres1_C_FDSW210055062-1r         | G    | 22      | 22      | 1      | A -> G     | 459        | SNP (transition)  | 55.80%            |                               | 0                 |                          | hypothetical protein CDS | hypothetical protein | None       | KLI71769.1 |
| Variant: VaphiVaphiSt2_B_A_FDSW210055054-2r | G    | 22      | 22      | 1      | A -> G     | 246        | SNP (transition)  | 52.00%            |                               | 0                 |                          | hypothetical protein CDS | hypothetical protein | None       | KLI71769.1 |
| Variant: VaphiSt2_B_FDSW210055056-1r        | G    | 22      | 22      | 1      | A -> G     | 526        | SNP (transition)  | 47.10%            |                               | 0                 |                          | hypothetical protein CDS | hypothetical protein | None       | KLI71769.1 |
| Variant: VaAphrodite_A_FDSW210055057-2r     | G    | 28      | 28      | 1      | A -> G     | 435        | SNP (transition)  | 29.70%            |                               | 0                 |                          | hypothetical protein CDS | hypothetical protein | None       | KLI71769.1 |
| Variant: VaAphrodite_B_FDSW210055058-2r     | G    | 28      | 28      | 1      | A -> G     | 328        | SNP (transition)  | 36.30%            |                               | 0                 |                          | hypothetical protein CDS | hypothetical protein | None       | KLI71769.1 |
| Variant: VaAphrodite_C_FDSW210055059-1r     | G    | 28      | 28      | 1      | A -> G     | 444        | SNP (transition)  | 32.90%            |                               | 0                 |                          | hypothetical protein CDS | hypothetical protein | None       | KLI71769.1 |
| Variant: VaAres1_A_FDSW210055060-2r         | G    | 28      | 28      | 1      | A -> G     | 295        | SNP (transition)  | 32.90%            | #####                         |                   |                          | hypothetical protein CDS | hypothetical protein | None       | KLI71769.1 |

|            |                                    |   |    |    |   |        |     |                    |        |       |        |                          |                          |                      |                |            |
|------------|------------------------------------|---|----|----|---|--------|-----|--------------------|--------|-------|--------|--------------------------|--------------------------|----------------------|----------------|------------|
| Variables: | VaAres1_B_FDSW210055061-2r         | G | 28 | 28 | 1 | A -> G | 292 | SNP (transition)   | 38.00% | ##### |        | hypothetical protein CDS | hypothetical protein     | None                 | KL171769.1     |            |
| Variables: | VaAres1_C_FDSW210055062-1r         | G | 28 | 28 | 1 | A -> G | 470 | SNP (transition)   | 37.40% |       | 0      | hypothetical protein CDS | hypothetical protein     | None                 | KL171769.1     |            |
| Variables: | VaphiVaphiSt2_B_A_FDSW210055054-2r | G | 28 | 28 | 1 | A -> G | 263 | SNP (transition)   | 41.40% | ##### |        | hypothetical protein CDS | hypothetical protein     | None                 | KL171769.1     |            |
| Variables: | VaphiSt2_B_FDSW210055056-1r        | G | 28 | 28 | 1 | A -> G | 535 | SNP (transition)   | 34.00% |       | 0      | hypothetical protein CDS | hypothetical protein     | None                 | KL171769.1     |            |
| Variables: | VaAphrodite_A_FDSW210055057-2r     | G | 31 | 31 | 1 | A -> G | 442 | SNP (transition)   | 83.90% |       | 0      | hypothetical protein CDS | hypothetical protein     | None                 | KL171769.1     |            |
| Variables: | VaAphrodite_B_FDSW210055058-2r     | G | 31 | 31 | 1 | A -> G | 336 | SNP (transition)   | 82.70% |       | 0      | hypothetical protein CDS | hypothetical protein     | None                 | KL171769.1     |            |
| Variables: | VaAphrodite_C_FDSW210055059-1r     | G | 31 | 31 | 1 | A -> G | 453 | SNP (transition)   | 83.90% |       | 0      | hypothetical protein CDS | hypothetical protein     | None                 | KL171769.1     |            |
| Variables: | VaAres1_A_FDSW210055060-2r         | G | 31 | 31 | 1 | A -> G | 297 | SNP (transition)   | 84.50% |       | 0      | hypothetical protein CDS | hypothetical protein     | None                 | KL171769.1     |            |
| Variables: | VaAres1_B_FDSW210055061-2r         | G | 31 | 31 | 1 | A -> G | 302 | SNP (transition)   | 85.10% |       | 0      | hypothetical protein CDS | hypothetical protein     | None                 | KL171769.1     |            |
| Variables: | VaAres1_C_FDSW210055062-1r         | G | 31 | 31 | 1 | A -> G | 481 | SNP (transition)   | 80.00% |       | 0      | hypothetical protein CDS | hypothetical protein     | None                 | KL171769.1     |            |
| Variables: | VaphiVaphiSt2_B_A_FDSW210055054-2r | G | 31 | 31 | 1 | A -> G | 262 | SNP (transition)   | 85.50% |       | 0      | hypothetical protein CDS | hypothetical protein     | None                 | KL171769.1     |            |
| Variables: | VaphiSt2_B_FDSW210055056-1r        | G | 31 | 31 | 1 | A -> G | 546 | SNP (transition)   | 82.80% |       | 0      | hypothetical protein CDS | hypothetical protein     | None                 | KL171769.1     |            |
| Variables: | VaAphrodite_A_FDSW210055057-2r     | A | 34 | 34 | 1 | G -> A | 450 | SNP (transition)   | 83.80% |       | 0      | hypothetical protein CDS | hypothetical protein     | None                 | KL171769.1     |            |
| Variables: | VaAphrodite_B_FDSW210055058-2r     | A | 34 | 34 | 1 | G -> A | 340 | SNP (transition)   | 81.50% |       | 0      | hypothetical protein CDS | hypothetical protein     | None                 | KL171769.1     |            |
| Variables: | VaAphrodite_C_FDSW210055059-1r     | A | 34 | 34 | 1 | G -> A | 461 | SNP (transition)   | 83.50% |       | 0      | hypothetical protein CDS | hypothetical protein     | None                 | KL171769.1     |            |
| Variables: | VaAres1_A_FDSW210055060-2r         | A | 34 | 34 | 1 | G -> A | 305 | SNP (transition)   | 84.60% |       | 0      | hypothetical protein CDS | hypothetical protein     | None                 | KL171769.1     |            |
| Variables: | VaAres1_B_FDSW210055061-2r         | A | 34 | 34 | 1 | G -> A | 304 | SNP (transition)   | 84.20% |       | 0      | hypothetical protein CDS | hypothetical protein     | None                 | KL171769.1     |            |
| Variables: | VaAres1_C_FDSW210055062-1r         | A | 34 | 34 | 1 | G -> A | 485 | SNP (transition)   | 79.00% |       | 0      | hypothetical protein CDS | hypothetical protein     | None                 | KL171769.1     |            |
| Variables: | VaphiVaphiSt2_B_A_FDSW210055054-2r | A | 34 | 34 | 1 | G -> A | 268 | SNP (transition)   | 84.00% |       | 0      | hypothetical protein CDS | hypothetical protein     | None                 | KL171769.1     |            |
| Variables: | VaphiSt2_B_FDSW210055056-1r        | A | 34 | 34 | 1 | G -> A | 552 | SNP (transition)   | 82.40% |       | 0      | hypothetical protein CDS | hypothetical protein     | None                 | KL171769.1     |            |
| Variables: | VaAphrodite_A_FDSW210055057-2r     | T | 39 | 39 | 1 | G -> T | 454 | SNP (transversion) | 27.80% | ##### | H -> N | hypothetical protein CDS | hypothetical protein     | Substituted on       | KL171769.1     |            |
| Variables: | VaAphrodite_B_FDSW210055058-2r     | T | 39 | 39 | 1 | G -> T | 347 | SNP (transversion) | 33.40% | ##### | H -> N | hypothetical protein CDS | hypothetical protein     | Substituted on       | KL171769.1     |            |
| Variables: | VaAphrodite_C_FDSW210055059-1r     | T | 39 | 39 | 1 | G -> T | 462 | SNP (transversion) | 31.20% |       | 0      | H -> N                   | hypothetical protein CDS | hypothetical protein | Substituted on | KL171769.1 |
| Variables: | VaAres1_A_FDSW210055060-2r         | T | 39 | 39 | 1 | G -> T | 310 | SNP (transversion) | 30.30% | ##### | H -> N | hypothetical protein CDS | hypothetical protein     | Substituted on       | KL171769.1     |            |
| Variables: | VaAres1_B_FDSW210055061-2r         | T | 39 | 39 | 1 | G -> T | 308 | SNP (transversion) | 36.40% | ##### | H -> N | hypothetical protein CDS | hypothetical protein     | Substituted on       | KL171769.1     |            |
| Variables: | VaAres1_C_FDSW210055062-1r         | T | 39 | 39 | 1 | G -> T | 494 | SNP (transversion) | 33.60% |       | 0      | H -> N                   | hypothetical protein CDS | hypothetical protein | Substituted on | KL171769.1 |
| Variables: | VaphiVaphiSt2_B_A_FDSW210055054-2r | T | 39 | 39 | 1 | G -> T | 280 | SNP (transversion) | 37.90% | ##### | H -> N | hypothetical protein CDS | hypothetical protein     | Substituted on       | KL171769.1     |            |
| Variables: | VaphiSt2_B_FDSW210055056-1r        | T | 39 | 39 | 1 | G -> T | 562 | SNP (transversion) | 32.70% |       | 0      | H -> N                   | hypothetical protein CDS | hypothetical protein | Substituted on | KL171769.1 |
| Variables: | VaAphrodite_A_FDSW210055057-2r     | G | 49 | 49 | 1 | A -> G | 467 | SNP (transition)   | 26.10% | ##### |        | hypothetical protein CDS | hypothetical protein     | None                 | KL171769.1     |            |
| Variables: | VaAphrodite_B_FDSW210055058-2r     | G | 49 | 49 | 1 | A -> G | 358 | SNP (transition)   | 30.20% | ##### |        | hypothetical protein CDS | hypothetical protein     | None                 | KL171769.1     |            |

|                                                  |   |    |    |   |        |     |                       |        |          |   |                             |                         |      |                |
|--------------------------------------------------|---|----|----|---|--------|-----|-----------------------|--------|----------|---|-----------------------------|-------------------------|------|----------------|
| Variables:<br>VaAphrodite_C_FDSW210055059-1r     | G | 49 | 49 | 1 | A -> G | 490 | SNP<br>(transition)   | 28.80% |          | 0 | hypothetical<br>protein CDS | hypothetical<br>protein | None | KL1717<br>69.1 |
| Variables:<br>VaAres1_A_FDSW210055060-2r         | G | 49 | 49 | 1 | A -> G | 309 | SNP<br>(transition)   | 27.50% | #####    |   | hypothetical<br>protein CDS | hypothetical<br>protein | None | KL1717<br>69.1 |
| Variables:<br>VaAres1_B_FDSW210055061-2r         | G | 49 | 49 | 1 | A -> G | 323 | SNP<br>(transition)   | 31.60% | #####    |   | hypothetical<br>protein CDS | hypothetical<br>protein | None | KL1717<br>69.1 |
| Variables:<br>VaAres1_C_FDSW210055062-1r         | G | 49 | 49 | 1 | A -> G | 497 | SNP<br>(transition)   | 31.60% |          | 0 | hypothetical<br>protein CDS | hypothetical<br>protein | None | KL1717<br>69.1 |
| Variables:<br>VaphiVaphiSt2_B_A_FDSW210055054-2r | G | 49 | 49 | 1 | A -> G | 285 | SNP<br>(transition)   | 35.10% | #####    |   | hypothetical<br>protein CDS | hypothetical<br>protein | None | KL1717<br>69.1 |
| Variables:<br>VaphiSt2_B_FDSW210055056-1r        | G | 49 | 49 | 1 | A -> G | 574 | SNP<br>(transition)   | 30.50% |          | 0 | hypothetical<br>protein CDS | hypothetical<br>protein | None | KL1717<br>69.1 |
| Variables:<br>VaAphrodite_B_FDSW210055058-2r     | A | 58 | 58 | 1 | G -> A | 364 | SNP<br>(transition)   | 27.50% | #####    |   | hypothetical<br>protein CDS | hypothetical<br>protein | None | KL1717<br>69.1 |
| Variables:<br>VaAphrodite_C_FDSW210055059-1r     | A | 58 | 58 | 1 | G -> A | 508 | SNP<br>(transition)   | 26.20% | 2.9E-314 |   | hypothetical<br>protein CDS | hypothetical<br>protein | None | KL1717<br>69.1 |
| Variables:<br>VaAres1_A_FDSW210055060-2r         | A | 58 | 58 | 1 | G -> A | 315 | SNP<br>(transition)   | 25.70% | #####    |   | hypothetical<br>protein CDS | hypothetical<br>protein | None | KL1717<br>69.1 |
| Variables:<br>VaAres1_B_FDSW210055061-2r         | A | 58 | 58 | 1 | G -> A | 339 | SNP<br>(transition)   | 29.50% | #####    |   | hypothetical<br>protein CDS | hypothetical<br>protein | None | KL1717<br>69.1 |
| Variables:<br>VaAres1_C_FDSW210055062-1r         | A | 58 | 58 | 1 | G -> A | 507 | SNP<br>(transition)   | 30.20% |          | 0 | hypothetical<br>protein CDS | hypothetical<br>protein | None | KL1717<br>69.1 |
| Variables:<br>VaphiVaphiSt2_B_A_FDSW210055054-2r | A | 58 | 58 | 1 | G -> A | 292 | SNP<br>(transition)   | 34.60% | #####    |   | hypothetical<br>protein CDS | hypothetical<br>protein | None | KL1717<br>69.1 |
| Variables:<br>VaphiSt2_B_FDSW210055056-1r        | A | 58 | 58 | 1 | G -> A | 588 | SNP<br>(transition)   | 28.40% |          | 0 | hypothetical<br>protein CDS | hypothetical<br>protein | None | KL1717<br>69.1 |
| Variables:<br>VaAphrodite_B_FDSW210055058-2r     | A | 66 | 66 | 1 | G -> A | 372 | SNP<br>(transition)   | 25.50% | #####    |   | hypothetical<br>protein CDS | hypothetical<br>protein | None | KL1717<br>69.1 |
| Variables:<br>VaAres1_B_FDSW210055061-2r         | A | 66 | 66 | 1 | G -> A | 359 | SNP<br>(transition)   | 28.10% | #####    |   | hypothetical<br>protein CDS | hypothetical<br>protein | None | KL1717<br>69.1 |
| Variables:<br>VaAres1_C_FDSW210055062-1r         | A | 66 | 66 | 1 | G -> A | 514 | SNP<br>(transition)   | 29.60% |          | 0 | hypothetical<br>protein CDS | hypothetical<br>protein | None | KL1717<br>69.1 |
| Variables:<br>VaphiVaphiSt2_B_A_FDSW210055054-2r | A | 66 | 66 | 1 | G -> A | 298 | SNP<br>(transition)   | 33.60% | #####    |   | hypothetical<br>protein CDS | hypothetical<br>protein | None | KL1717<br>69.1 |
| Variables:<br>VaphiSt2_B_FDSW210055056-1r        | A | 66 | 66 | 1 | G -> A | 596 | SNP<br>(transition)   | 27.70% |          | 0 | hypothetical<br>protein CDS | hypothetical<br>protein | None | KL1717<br>69.1 |
| Variables:<br>VaAphrodite_B_FDSW210055058-2r     | T | 70 | 70 | 1 | G -> T | 371 | SNP<br>(transversion) | 25.30% | #####    |   | hypothetical<br>protein CDS | hypothetical<br>protein | None | KL1717<br>69.1 |
| Variables:<br>VaAres1_B_FDSW210055061-2r         | T | 70 | 70 | 1 | G -> T | 362 | SNP<br>(transversion) | 28.20% | #####    |   | hypothetical<br>protein CDS | hypothetical<br>protein | None | KL1717<br>69.1 |
| Variables:<br>VaAres1_C_FDSW210055062-1r         | T | 70 | 70 | 1 | G -> T | 512 | SNP<br>(transversion) | 29.30% |          | 0 | hypothetical<br>protein CDS | hypothetical<br>protein | None | KL1717<br>69.1 |
| Variables:<br>VaphiVaphiSt2_B_A_FDSW210055054-2r | T | 70 | 70 | 1 | G -> T | 296 | SNP<br>(transversion) | 33.10% | #####    |   | hypothetical<br>protein CDS | hypothetical<br>protein | None | KL1717<br>69.1 |
| Variables:<br>VaphiSt2_B_FDSW210055056-1r        | T | 70 | 70 | 1 | G -> T | 590 | SNP<br>(transversion) | 26.80% |          | 0 | hypothetical<br>protein CDS | hypothetical<br>protein | None | KL1717<br>69.1 |
| Variables:<br>VaAphrodite_A_FDSW210055057-2r     | G | 79 | 79 | 1 | A -> G | 464 | SNP<br>(transition)   | 33.80% |          | 0 | hypothetical<br>protein CDS | hypothetical<br>protein | None | KL1717<br>69.1 |
| Variables:<br>VaAphrodite_B_FDSW210055058-2r     | G | 79 | 79 | 1 | A -> G | 360 | SNP<br>(transition)   | 29.40% | #####    |   | hypothetical<br>protein CDS | hypothetical<br>protein | None | KL1717<br>69.1 |
| Variables:<br>VaAphrodite_C_FDSW210055059-1r     | G | 79 | 79 | 1 | A -> G | 494 | SNP<br>(transition)   | 31.60% |          | 0 | hypothetical<br>protein CDS | hypothetical<br>protein | None | KL1717<br>69.1 |
| Variables:<br>VaAres1_A_FDSW210055060-2r         | G | 79 | 79 | 1 | A -> G | 307 | SNP<br>(transition)   | 30.60% | #####    |   | hypothetical<br>protein CDS | hypothetical<br>protein | None | KL1717<br>69.1 |
| Variables:<br>VaAres1_B_FDSW210055061-2r         | G | 79 | 79 | 1 | A -> G | 343 | SNP<br>(transition)   | 26.20% | #####    |   | hypothetical<br>protein CDS | hypothetical<br>protein | None | KL1717<br>69.1 |
| Variables:<br>VaphiVaphiSt2_B_A_FDSW210055054-2r | G | 79 | 79 | 1 | A -> G | 290 | SNP<br>(transition)   | 27.20% | #####    |   | hypothetical<br>protein CDS | hypothetical<br>protein | None | KL1717<br>69.1 |
| Variables:<br>VaphiSt2_B_FDSW210055056-1r        | G | 79 | 79 | 1 | A -> G | 574 | SNP<br>(transition)   | 29.10% |          | 0 | hypothetical<br>protein CDS | hypothetical<br>protein | None | KL1717<br>69.1 |

20

|            |                                    |    |     |     |   |            |            |                    |                |       |          |          |                          |                      |              |            |
|------------|------------------------------------|----|-----|-----|---|------------|------------|--------------------|----------------|-------|----------|----------|--------------------------|----------------------|--------------|------------|
| Variables: | VaphiSt2_B_FDSW210055056-1r        | T  | 131 | 131 | 1 | G -> T     | 485        | SNP (transversion) | 34.60%         |       | 0        | T -> K   | hypothetical protein CDS | hypothetical protein | Substitution | KLI71769.1 |
| Variables: | VaAphrodite_A_FDSW210055057-2r     | A  | 136 | 136 | 1 | G -> A     | 356        | SNP (transition)   | 25.60%         | ##### |          |          | hypothetical protein CDS | hypothetical protein | None         | KLI71769.1 |
| Variables: | VaAphrodite_A_FDSW210055057-2r     | C  | 175 | 175 | 1 | T -> C     | 235        | SNP (transition)   | 45.10%         | ##### |          |          | hypothetical protein CDS | hypothetical protein | None         | KLI71769.1 |
| Variables: | VaAphrodite_B_FDSW210055058-2r     | C  | 175 | 175 | 1 | T -> C     | 199        | SNP (transition)   | 43.70%         | ##### |          |          | hypothetical protein CDS | hypothetical protein | None         | KLI71769.1 |
| Variables: | VaAphrodite_C_FDSW210055059-1r     | C  | 175 | 175 | 1 | T -> C     | 253        | SNP (transition)   | 45.50%         | ##### |          |          | hypothetical protein CDS | hypothetical protein | None         | KLI71769.1 |
| Variables: | VaAres1_A_FDSW210055060-2r         | C  | 175 | 175 | 1 | T -> C     | 158        | SNP (transition)   | 39.90%         | ##### |          |          | hypothetical protein CDS | hypothetical protein | None         | KLI71769.1 |
| Variables: | VaAres1_B_FDSW210055061-2r         | C  | 175 | 175 | 1 | T -> C     | 205        | SNP (transition)   | 46.80%         | ##### |          |          | hypothetical protein CDS | hypothetical protein | None         | KLI71769.1 |
| Variables: | VaAres1_C_FDSW210055062-1r         | C  | 175 | 175 | 1 | T -> C     | 243        | SNP (transition)   | 40.70%         | ##### |          |          | hypothetical protein CDS | hypothetical protein | None         | KLI71769.1 |
| Variables: | VaphiVaphiSt2_B_A_FDSW210055054-2r | C  | 175 | 175 | 1 | T -> C     | 144        | SNP (transition)   | 49.30%         | ##### |          |          | hypothetical protein CDS | hypothetical protein | None         | KLI71769.1 |
| Variables: | VaphiSt2_B_FDSW210055056-1r        | C  | 175 | 175 | 1 | T -> C     | 307        | SNP (transition)   | 40.40%         | ##### |          |          | hypothetical protein CDS | hypothetical protein | None         | KLI71769.1 |
| Variables: | VaAphrodite_A_FDSW210055057-2r     | GC |     |     |   | AGC -> GCG | 210 -> 211 | Substitution       | 26.1% -> 26.2% | ##### |          | SS -> TP | hypothetical protein CDS | hypothetical protein | Substitution | KLI71769.1 |
| Variables: | VaAphrodite_B_FDSW210055058-2r     | GC | 180 | 182 | 3 | GCG        | 175 -> 185 | Substitution       | 24.9% -> 26.3% | ##### | 1.10E-96 | SS -> TP | hypothetical protein CDS | hypothetical protein | Substitution | KLI71769.1 |
| Variables: | VaAphrodite_C_FDSW210055059-1r     | GC | 180 | 182 | 3 | AGC -> GCG | 228 -> 233 | Substitution       | 28.3% -> 28.9% | ##### |          | SS -> TP | hypothetical protein CDS | hypothetical protein | Substitution | KLI71769.1 |
| Variables: | VaAres1_A_FDSW210055060-2r         | GC | 180 | 181 | 2 | AG -> GC   | 143 -> 147 | Substitution       | 35.7% -> 36.1% | ##### |          | SS -> RP | hypothetical protein CDS | hypothetical protein | Substitution | KLI71769.1 |
| Variables: | VaAres1_B_FDSW210055061-2r         | GC | 180 | 182 | 3 | AGC -> GCG | 178 -> 183 | Substitution       | 30.6% -> 31.5% | ##### |          | SS -> TP | hypothetical protein CDS | hypothetical protein | Substitution | KLI71769.1 |
| Variables: | VaAres1_C_FDSW210055062-1r         | GC | 180 | 182 | 3 | AGC -> GCG | 215 -> 222 | Substitution       | 27.9% -> 28.8% | ##### |          | SS -> TP | hypothetical protein CDS | hypothetical protein | Substitution | KLI71769.1 |
| Variables: | VaphiVaphiSt2_B_A_FDSW210055054-2r | GC |     |     |   | AGC -> GCG | 127 -> 129 | Substitution       | 34.9% -> 35.4% | ##### |          | SS -> TP | hypothetical protein CDS | hypothetical protein | Substitution | KLI71769.1 |
| Variables: | VaphiSt2_B_FDSW210055056-1r        | GC | 180 | 182 | 3 | AGC -> GCG | 286 -> 293 | Substitution       | 25.9% -> 26.6% | ##### |          | SS -> TP | hypothetical protein CDS | hypothetical protein | Substitution | KLI71769.1 |
| Variables: | VaAphrodite_A_FDSW210055057-2r     | G  | 190 | 190 | 1 | C -> G     | 195        | SNP (transversion) | 32.30%         | ##### |          | E -> D   | hypothetical protein CDS | hypothetical protein | Substitution | KLI71769.1 |
| Variables: | VaAphrodite_B_FDSW210055058-2r     | G  | 190 | 190 | 1 | C -> G     | 158        | SNP (transversion) | 35.40%         | ##### |          | E -> D   | hypothetical protein CDS | hypothetical protein | Substitution | KLI71769.1 |
| Variables: | VaAphrodite_C_FDSW210055059-1r     | G  | 190 | 190 | 1 | C -> G     | 199        | SNP (transversion) | 33.70%         | ##### |          | E -> D   | hypothetical protein CDS | hypothetical protein | Substitution | KLI71769.1 |
| Variables: | VaAres1_A_FDSW210055060-2r         | G  | 190 | 190 | 1 | C -> G     | 127        | SNP (transversion) | 26.00%         | ##### | 1.10E-62 | E -> D   | hypothetical protein CDS | hypothetical protein | Substitution | KLI71769.1 |
| Variables: | VaAres1_B_FDSW210055061-2r         | G  | 190 | 190 | 1 | C -> G     | 161        | SNP (transversion) | 37.90%         | ##### |          | E -> D   | hypothetical protein CDS | hypothetical protein | Substitution | KLI71769.1 |
| Variables: | VaAres1_C_FDSW210055062-1r         | G  | 190 | 190 | 1 | C -> G     | 184        | SNP (transversion) | 28.80%         | ##### |          | E -> D   | hypothetical protein CDS | hypothetical protein | Substitution | KLI71769.1 |
| Variables: | VaphiVaphiSt2_B_A_FDSW210055054-2r | G  | 190 | 190 | 1 | C -> G     | 101        | SNP (transversion) | 42.60%         | ##### | 1.20E-96 | E -> D   | hypothetical protein CDS | hypothetical protein | Substitution | KLI71769.1 |
| Variables: | VaphiSt2_B_FDSW210055056-1r        | G  | 190 | 190 | 1 | C -> G     | 256        | SNP (transversion) | 32.00%         | ##### |          | E -> D   | hypothetical protein CDS | hypothetical protein | Substitution | KLI71769.1 |
| Variables: | VaAphrodite_A_FDSW210055057-2r     | A  | 193 | 193 | 1 | T -> A     | 181        | SNP (transversion) | 28.70%         | ##### | 2.80E-95 |          | hypothetical protein CDS | hypothetical protein | None         | KLI71769.1 |
| Variables: | VaAphrodite_B_FDSW210055058-2r     | A  | 193 | 193 | 1 | T -> A     | 148        | SNP (transversion) | 33.80%         | ##### |          |          | hypothetical protein CDS | hypothetical protein | None         | KLI71769.1 |
| Variables: | VaAphrodite_C_FDSW210055059-1r     | A  | 193 | 193 | 1 | T -> A     | 188        | SNP (transversion) | 30.90%         | ##### |          |          | hypothetical protein CDS | hypothetical protein | None         | KLI71769.1 |
| Variables: | VaAres1_A_FDSW210055060-2r         | A  | 193 | 193 | 1 | T -> A     | 124        | SNP (transversion) | 25.00%         | ##### | 2.20E-58 |          | hypothetical protein CDS | hypothetical protein | None         | KLI71769.1 |

|                                                                                                                                                                                                                                                                                                                                                                                                                                                                                                                                                                                                                                                                      |   |       |       |   |        |     |                    |        |          |        |                          |                          |              |            |
|----------------------------------------------------------------------------------------------------------------------------------------------------------------------------------------------------------------------------------------------------------------------------------------------------------------------------------------------------------------------------------------------------------------------------------------------------------------------------------------------------------------------------------------------------------------------------------------------------------------------------------------------------------------------|---|-------|-------|---|--------|-----|--------------------|--------|----------|--------|--------------------------|--------------------------|--------------|------------|
| Variants:<br>VaAres1_B_FDSW210055061-2r<br>Variants:<br>VaAres1_C_FDSW210055062-1r<br>Variants:<br>VaphiVaphiSt2_B_A_FDSW210055054-2r<br>Variants:<br>VaphiSt2_B_FDSW210055056-1r<br>Variants:<br>VaAphrodite_B_FDSW210055058-2r<br>Variants:<br>VaAphrodite_C_FDSW210055059-1r<br>Variants:<br>VaAres1_B_FDSW210055061-2r<br>Variants:<br>VaphiVaphiSt2_B_A_FDSW210055054-2r<br>Variants:<br>VaphiSt2_B_FDSW210055056-1r<br>Variants:<br>VaAphrodite_B_FDSW210055058-2r<br>Variants:<br>VaAres1_B_FDSW210055061-2r<br>Variants:<br>VaphiVaphiSt2_B_A_FDSW210055054-2r<br>Variants:<br>VaAres1_B_FDSW210055061-2r<br>Variants:<br>VaphiVaphiSt2_B_A_FDSW210055054-2r | A | 193   | 193   | 1 | T -> A | 151 | SNP (transversion) | 34.40% | #####    |        | hypothetical protein CDS | hypothetical protein     | None         | KLI71769.1 |
|                                                                                                                                                                                                                                                                                                                                                                                                                                                                                                                                                                                                                                                                      | A | 193   | 193   | 1 | T -> A | 179 | SNP (transversion) | 27.40% | 1.50E-93 |        | hypothetical protein CDS | hypothetical protein     | None         | KLI71769.1 |
|                                                                                                                                                                                                                                                                                                                                                                                                                                                                                                                                                                                                                                                                      | A | 193   | 193   | 1 | T -> A | 102 | SNP (transversion) | 40.20% | 6.60E-91 |        | hypothetical protein CDS | hypothetical protein     | None         | KLI71769.1 |
|                                                                                                                                                                                                                                                                                                                                                                                                                                                                                                                                                                                                                                                                      | A | 193   | 193   | 1 | T -> A | 244 | SNP (transversion) | 29.10% | #####    |        | hypothetical protein CDS | hypothetical protein     | None         | KLI71769.1 |
|                                                                                                                                                                                                                                                                                                                                                                                                                                                                                                                                                                                                                                                                      | C | 198   | 198   | 1 | T -> C | 135 | SNP (transition)   | 29.60% | 2.80E-82 | I -> V | hypothetical protein CDS | hypothetical protein     | Substitution | KLI71769.1 |
|                                                                                                                                                                                                                                                                                                                                                                                                                                                                                                                                                                                                                                                                      | C | 198   | 198   | 1 | T -> C | 175 | SNP (transition)   | 26.90% | #####    | I -> V | hypothetical protein CDS | hypothetical protein     | Substitution | KLI71769.1 |
|                                                                                                                                                                                                                                                                                                                                                                                                                                                                                                                                                                                                                                                                      | C | 198   | 198   | 1 | T -> C | 137 | SNP (transition)   | 31.40% | 2.60E-85 | I -> V | hypothetical protein CDS | hypothetical protein     | Substitution | KLI71769.1 |
|                                                                                                                                                                                                                                                                                                                                                                                                                                                                                                                                                                                                                                                                      | C | 198   | 198   | 1 | T -> C | 95  | SNP (transition)   | 33.70% | 4.50E-65 | I -> V | hypothetical protein CDS | hypothetical protein     | Substitution | KLI71769.1 |
|                                                                                                                                                                                                                                                                                                                                                                                                                                                                                                                                                                                                                                                                      | C | 198   | 198   | 1 | T -> C | 227 | SNP (transition)   | 27.30% | #####    | I -> V | hypothetical protein CDS | hypothetical protein     | Substitution | KLI71769.1 |
|                                                                                                                                                                                                                                                                                                                                                                                                                                                                                                                                                                                                                                                                      | C | 201   | 201   | 1 | T -> C | 126 | SNP (transition)   | 25.40% | 1.80E-60 | T -> A | hypothetical protein CDS | hypothetical protein     | Substitution | KLI71769.1 |
|                                                                                                                                                                                                                                                                                                                                                                                                                                                                                                                                                                                                                                                                      | C | 201   | 201   | 1 | T -> C | 126 | SNP (transition)   | 28.60% | 1.50E-73 | T -> A | hypothetical protein CDS | hypothetical protein     | Substitution | KLI71769.1 |
|                                                                                                                                                                                                                                                                                                                                                                                                                                                                                                                                                                                                                                                                      | C | 201   | 201   | 1 | T -> C | 92  | SNP (transition)   | 28.30% | 2.10E-53 | T -> A | hypothetical protein CDS | hypothetical protein     | Substitution | KLI71769.1 |
|                                                                                                                                                                                                                                                                                                                                                                                                                                                                                                                                                                                                                                                                      | A | 34442 | 34442 | 1 | C -> A | 51  | SNP (transversion) | 25.50% | 9.90E-07 |        |                          |                          |              |            |
|                                                                                                                                                                                                                                                                                                                                                                                                                                                                                                                                                                                                                                                                      | A | 45182 | 45182 | 1 | C -> A | 104 | SNP (transversion) | 26.00% | 5.10E-15 | M -> I | prpE CDS                 | propionyl-CoA synthetase | Substitution | KLI71805.1 |

## Contig 15

| Variant                                      | Name | Minimum | Maximum | Length | Change | Coverage | Polymorphism Type  | Variant Frequency | Variant P-Value (approximate) | Amino Acid Change | CDS                           | product                   | Protein Effect | protein_id |
|----------------------------------------------|------|---------|---------|--------|--------|----------|--------------------|-------------------|-------------------------------|-------------------|-------------------------------|---------------------------|----------------|------------|
| Variants: VaAres1_A_FDSW210055060-2r         | T    | 64122   | 64122   | 1      | G -> T | 120      | SNP (transversion) | 96.70%            | 0                             | Q -> H            | transcriptional regulator CDS | transcriptional regulator | Substitution   | KLI71554.1 |
| Variants: VaAres1_C_FDSW210055062-1r         | T    | 64122   | 64122   | 1      | G -> T | 190      | SNP (transversion) | 96.80%            | 0                             | Q -> H            | transcriptional regulator CDS | transcriptional regulator | Substitution   | KLI71554.1 |
| Variants: VaAres1_A_FDSW210055060-2r         | A    | 76493   | 76493   | 1      | C -> A | 103      | SNP (transversion) | 27.20%            | 5.40E-09                      |                   |                               |                           |                |            |
| Variants: VaphiVaphiSt2_B_A_FDSW210055054-2r | A    | 131308  | 131308  | 1      | T -> A | 104      | SNP (transversion) | 26.90%            | 5.80E-16                      | K -> N            | membrane protein CDS          | membrane protein          | Substitution   | KLI71610.1 |

## Contig 16

| Variant                                            | Name            | Minimum | Maximum | Length | Change | Coverage      | Polymorphism Type | Variant Frequency | Variant P-Value (approximate) | CDS                            | product                    | Protein Effect | protein_id     |
|----------------------------------------------------|-----------------|---------|---------|--------|--------|---------------|-------------------|-------------------|-------------------------------|--------------------------------|----------------------------|----------------|----------------|
| Variant:<br>VaphiVaphiSt2_B_A_FDSW21005505<br>4-2r | CTGACGTC<br>ATC | 48427   | 48426   | 0      | #NAME? | 154 -><br>158 | Insertion         | 100.00%           | 0                             | chemotaxis protein<br>CheY CDS | chemotaxis protein<br>CheY | Frame<br>Shift | KLI7147<br>8.1 |
| Variant:<br>VaphiSt2_B_FDSW210055056-1r            | CTGACGTC<br>ATC | 48427   | 48426   | 0      | #NAME? | 289           | Insertion         | 29.80%            | #####                         | chemotaxis protein<br>CheY CDS | chemotaxis protein<br>CheY | Frame<br>Shift | KLI7147<br>8.1 |



## Contig 17

| Variant                                     | Name | Minimum | Maximum | Length | Change  | Coverage   | Polymorphism Type | Variant Frequency | Variant P-Value (approximate) | CDS       | product              | Protein Effect   | protein_id | Amino Acid Change      |
|---------------------------------------------|------|---------|---------|--------|---------|------------|-------------------|-------------------|-------------------------------|-----------|----------------------|------------------|------------|------------------------|
| Variant: VaAphrodite_A_FDSW210055057-2r     | G    | 22      | 22      | 1      | A -> G  | 485        | SNP (transition)  | 38.10%            |                               | 0         |                      |                  |            |                        |
| Variant: VaAphrodite_B_FDSW210055058-2r     | G    | 22      | 22      | 1      | A -> G  | 422        | SNP (transition)  | 37.90%            |                               | 0         |                      |                  |            |                        |
| Variant: VaAphrodite_C_FDSW210055059-1r     | G    | 22      | 22      | 1      | A -> G  | 523        | SNP (transition)  | 39.00%            |                               | 0         |                      |                  |            |                        |
| Variant: VaAres1_A_FDSW210055060-2r         | G    | 22      | 22      | 1      | A -> G  | 261        | SNP (transition)  | 51.00%            | 2.00E-269                     |           |                      |                  |            |                        |
| Variant: VaAres1_B_FDSW210055061-2r         | G    | 22      | 22      | 1      | A -> G  | 289        | SNP (transition)  | 39.40%            | 8.20E-226                     |           |                      |                  |            |                        |
| Variant: VaAres1_C_FDSW210055062-1r         | G    | 22      | 22      | 1      | A -> G  | 382        | SNP (transition)  | 41.10%            |                               | 0         |                      |                  |            |                        |
| Variant: VaphiVaphiSt2_B_A_FDSW210055054-2r | G    | 22      | 22      | 1      | A -> G  | 318        | SNP (transition)  | 41.50%            | 3.00E-291                     |           |                      |                  |            |                        |
| Variant: VaphiSt2_B_FDSW210055056-1r        | G    | 22      | 22      | 1      | A -> G  | 591        | SNP (transition)  | 35.90%            |                               | 0         |                      |                  |            |                        |
| Variant: VaAphrodite_A_FDSW210055057-2r     | A    | 36      | 36      | 1      | G -> A  | 547        | SNP (transition)  | 31.10%            | 2.9E-314                      |           |                      |                  |            |                        |
| Variant: VaAphrodite_B_FDSW210055058-2r     | A    | 36      | 36      | 1      | G -> A  | 488        | SNP (transition)  | 34.40%            |                               | 0         |                      |                  |            |                        |
| Variant: VaAphrodite_C_FDSW210055059-1r     | A    | 36      | 36      | 1      | G -> A  | 575        | SNP (transition)  | 35.80%            |                               | 0         |                      |                  |            |                        |
| Variant: VaAres1_A_FDSW210055060-2r         | A    | 36      | 36      | 1      | G -> A  | 275        | SNP (transition)  | 40.40%            | 3.90E-177                     |           |                      |                  |            |                        |
| Variant: VaAres1_B_FDSW210055061-2r         | A    | 36      | 36      | 1      | G -> A  | 324        | SNP (transition)  | 39.50%            | 2.00E-253                     |           |                      |                  |            |                        |
| Variant: VaAres1_C_FDSW210055062-1r         | A    | 36      | 36      | 1      | G -> A  | 447        | SNP (transition)  | 37.60%            |                               | 0         |                      |                  |            |                        |
| Variant: VaphiVaphiSt2_B_A_FDSW210055054-2r | A    | 36      | 36      | 1      | G -> A  | 341        | SNP (transition)  | 38.10%            | 5.20E-216                     |           |                      |                  |            |                        |
| Variant: VaphiSt2_B_FDSW210055056-1r        | A    | 36      | 36      | 1      | G -> A  | 674        | SNP (transition)  | 35.50%            |                               | 0         |                      |                  |            |                        |
| Variant: VaAphrodite_A_FDSW210055057-2r     | C    | 72      | 73      | 2      | AT -> C | 587 -> 588 | Deletion          | 32.3% -> 32.4%    |                               | 3.40E-101 |                      |                  |            |                        |
| Variant: VaAphrodite_B_FDSW210055058-2r     | C    | 72      | 73      | 2      | AT -> C | 539 -> 543 | Deletion          | 28.4% -> 28.6%    |                               | 2.20E-78  |                      |                  |            |                        |
| Variant: VaAphrodite_C_FDSW210055059-1r     | C    | 72      | 73      | 2      | AT -> C | 639 -> 640 | Deletion          | 28.1% -> 28.2%    |                               | 9.10E-85  |                      |                  |            |                        |
| Variant: VaAres1_B_FDSW210055061-2r         | C    | 72      | 73      | 2      | AT -> C | 361 -> 364 | Deletion          | 31.3% -> 31.6%    |                               | 2.50E-61  |                      |                  |            |                        |
| Variant: VaAres1_C_FDSW210055062-1r         | C    | 72      | 73      | 2      | AT -> C | 502 -> 504 | Deletion          | 28.2% -> 28.3%    |                               | 8.10E-71  |                      |                  |            |                        |
| Variant: VaphiVaphiSt2_B_A_FDSW210055054-2r | C    | 72      | 73      | 2      | AT -> C | 376        | Deletion          | 29.80%            |                               | 1.10E-47  |                      |                  |            |                        |
| Variant: VaphiSt2_B_FDSW210055056-1r        | C    | 72      | 73      | 2      | AT -> C | 745 -> 749 | Deletion          | 32.0% -> 32.2%    |                               | 2.90E-128 |                      |                  |            |                        |
| Variant: VaAres1_A_FDSW210055060-2r         | T    | 77      | 77      | 1      | C -> T  | 221        | SNP (transition)  | 39.40%            |                               | 2.40E-181 |                      |                  |            |                        |
| Variant: VaAres1_B_FDSW210055061-2r         | T    | 77      | 77      | 1      | C -> T  | 368        | SNP (transition)  | 25.30%            |                               | 1.50E-181 |                      |                  |            |                        |
| Variant: VaAres1_C_FDSW210055062-1r         | T    | 77      | 77      | 1      | C -> T  | 514        | SNP (transition)  | 25.90%            |                               | 3.70E-247 |                      |                  |            |                        |
| Variant: VaphiVaphiSt2_B_A_FDSW210055054-2r | T    | 77      | 77      | 1      | C -> T  | 375        | SNP (transition)  | 25.10%            |                               | 2.00E-136 |                      |                  |            |                        |
| Variant: VaphiSt2_B_FDSW210055056-1r        |      | 17255   | 17266   | 12     | #NAME?  | 254 -> 258 | Deletion          | 64.3% -> 65.4%    |                               | 5.10E-212 | membrane protein CDS | membrane protein | Deletion   | KL1712 54.1 LTHTN -> H |

[illegible]

27

|                                    |   |       |       |   |        |     |              |        |          |   |
|------------------------------------|---|-------|-------|---|--------|-----|--------------|--------|----------|---|
| Variants:                          |   | 21710 | 21710 |   |        |     | SNP          |        |          |   |
| VaAres1_B_FDSW210055061-2r         | G | 9     | 9     | 1 | A -> G | 257 | (transition) | 56.80% |          | 0 |
| Variants:                          |   | 21710 | 21710 |   |        |     | SNP          |        |          |   |
| VaAres1_C_FDSW210055062-1r         | G | 9     | 9     | 1 | A -> G | 343 | (transition) | 55.70% |          | 0 |
| Variants:                          |   |       |       |   |        |     |              |        |          |   |
| VaphiVaphiSt2_B_A_FDSW210055054-2r | G | 21710 | 21710 |   |        |     | SNP          |        |          |   |
|                                    |   | 9     | 9     | 1 | A -> G | 184 | (transition) | 57.10% | 7.1E-315 |   |
| Variants:                          |   | 21710 | 21710 |   |        |     | SNP          |        |          |   |
| VaphiSt2_B_FDSW210055056-1r        | G | 9     | 9     | 1 | A -> G | 484 | (transition) | 60.70% |          | 0 |

## Contig 18

| Variant                                      | Name | Minimum | Maximum | Length | Change       | Coverage | Polymorphism Type        | Variant Frequency | Variant P-Value (approximate) |
|----------------------------------------------|------|---------|---------|--------|--------------|----------|--------------------------|-------------------|-------------------------------|
| Variants: VaphiVaphiSt2_B_A_FDSW210055054-2r | A    | 70559   | 70559   | 1      | C -> A       | 61       | SNP (transversion)       | 31.10%            | 7.70E-11                      |
| Variants: VaphiVaphiSt2_B_A_FDSW210055054-2r | T    | 70568   | 70568   | 1      | G -> T       | 63       | SNP (transversion)       | 30.20%            | 2.50E-07                      |
| Variants: VaphiSt2_B_FDSW210055056-1r        |      | 96521   | 96521   | 1      | (T)7 -> (T)6 | 177      | Deletion (tandem repeat) | 26.00%            | 7.30E-33                      |

## Contig 19

| Variant                                    | Name | Minimum | Maximum | Length | Change  | Coverage | Polymorphism Type  | Variant Frequency | Variant P-Value (approximate) | Amino Acid Change | CDS                                  | product                          | Protein Effect | protein_id |
|--------------------------------------------|------|---------|---------|--------|---------|----------|--------------------|-------------------|-------------------------------|-------------------|--------------------------------------|----------------------------------|----------------|------------|
| Variant:<br>VaAphrodite_A_FDSW210055057-2r | A    | 10530   | 10530   | 1      | G -> A  | 235      | SNP (transition)   | 29.80%            | 7.80E-185                     |                   | RNA polymerase sigma factor RpoS CDS | RNA polymerase sigma factor RpoS | Truncation     | KLI71089.1 |
| Variant:<br>VaAphrodite_B_FDSW210055058-2r |      | 10830   | 10831   | 2      | #NA ME? | 187      | Deletion           | 73.80%            | 1.60E-176                     |                   | RNA polymerase sigma factor RpoS CDS | RNA polymerase sigma factor RpoS | Frame Shift    | KLI71089.1 |
| Variant:<br>VaAres1_C_FDSW210055062-1r     | A    | 10548   | 10548   | 1      | T -> A  | 230      | SNP (transversion) | 98.70%            | 0                             | I -> F            | RNA polymerase sigma factor RpoS CDS | RNA polymerase sigma factor RpoS | Substitution   | KLI71089.1 |

## Contig 21

| Variant                                      | Name | Minimum | Maximum | Length | Change | Coverage | Polymorphism Type  | Variant Frequency | Variant P-Value (approximate) |
|----------------------------------------------|------|---------|---------|--------|--------|----------|--------------------|-------------------|-------------------------------|
| Variants: VaAphrodite_A_FDSW210055057-2r     | T    | 107595  | 107595  | 1      | A -> T | 115      | SNP (transversion) | 25.20%            | 1.80E-08                      |
| Variants: VaAphrodite_B_FDSW210055058-2r     | T    | 107591  | 107591  | 1      | G -> T | 104      | SNP (transversion) | 25.00%            | 4.30E-14                      |
| Variants: VaAphrodite_B_FDSW210055058-2r     | A    | 107604  | 107604  | 1      | C -> A | 107      | SNP (transversion) | 26.20%            | 1.00E-20                      |
| Variants: VaAres1_A_FDSW210055060-2r         | T    | 107601  | 107601  | 1      | G -> T | 99       | SNP (transversion) | 26.30%            | 3.40E-10                      |
| Variants: VaAres1_B_FDSW210055061-2r         | T    | 107585  | 107585  | 1      | G -> T | 99       | SNP (transversion) | 25.30%            | 5.90E-16                      |
| Variants: VaphiVaphiSt2_B_A_FDSW210055054-2r | T    | 107591  | 107591  | 1      | G -> T | 79       | SNP (transversion) | 27.80%            | 2.60E-19                      |
| Variants: VaphiVaphiSt2_B_A_FDSW210055054-2r | T    | 107601  | 107601  | 1      | G -> T | 79       | SNP (transversion) | 30.40%            | 4.80E-13                      |
| Variants: VaphiVaphiSt2_B_A_FDSW210055054-2r | A    | 107604  | 107604  | 1      | C -> A | 81       | SNP (transversion) | 25.90%            | 9.80E-07                      |

## Contig 22

| Variant                                        | Name | Minimum | Maximum | Length | Change | Coverage | Polymorphism Type  | Variant Frequency | Variant P-Value (approximate) | Amino Acid Change | CDS                      | product              | Protein Effect | protein_id  |
|------------------------------------------------|------|---------|---------|--------|--------|----------|--------------------|-------------------|-------------------------------|-------------------|--------------------------|----------------------|----------------|-------------|
| Variant:<br>VaAres1_A_FDSW210055060-2r         | A    | 13788   | 13788   | 1      | C -> A | 94       | SNP (transversion) | 27.70%            | 3.00E-15                      | R -> I            | hypothetical protein CDS | hypothetical protein | Substitution   | KLI7075 7.1 |
| Variant:<br>VaAres1_A_FDSW210055060-2r         | A    | 13803   | 13803   | 1      | C -> A | 101      | SNP (transversion) | 25.70%            | 3.70E-12                      | G -> V            | hypothetical protein CDS | hypothetical protein | Substitution   | KLI7075 7.1 |
| Variant:<br>VaphiVaphiSt2_B_A_FDSW210055054-2r | T    | 2133    | 2133    | 1      | G -> T | 73       | SNP (transversion) | 27.40%            | 3.20E-10                      | C -> F            | hypothetical protein CDS | hypothetical protein | Substitution   | KLI7075 0.1 |
| Variant:<br>VaphiVaphiSt2_B_A_FDSW210055054-2r | A    | 13788   | 13788   | 1      | C -> A | 82       | SNP (transversion) | 32.90%            | 4.40E-13                      | R -> I            | hypothetical protein CDS | hypothetical protein | Substitution   | KLI7075 7.1 |
| Variant:<br>VaphiVaphiSt2_B_A_FDSW210055054-2r | A    | 13803   | 13803   | 1      | C -> A | 80       | SNP (transversion) | 28.70%            | 4.70E-14                      | G -> V            | hypothetical protein CDS | hypothetical protein | Substitution   | KLI7075 7.1 |
| Variant:<br>VaphiVaphiSt2_B_A_FDSW210055054-2r | A    | 13810   | 13810   | 1      | T -> A | 82       | SNP (transversion) | 25.60%            | 2.70E-08                      | M -> L            | hypothetical protein CDS | hypothetical protein | Substitution   | KLI7075 7.1 |
| Variant:<br>VaphiVaphiSt2_B_A_FDSW210055054-2r | T    | 13822   | 13822   | 1      | G -> T | 84       | SNP (transversion) | 28.60%            | 1.00E-16                      | Q -> K            | hypothetical protein CDS | hypothetical protein | Substitution   | KLI7075 7.1 |



## Contig 23

| Variant                              | Name | Minimum | Maximum | Length | Change   | Coverage | Polymorphism Type  | Variant Frequency | Variant P-Value (approximate) |
|--------------------------------------|------|---------|---------|--------|----------|----------|--------------------|-------------------|-------------------------------|
| Variants: VaAres1_A_FDSW210055060-2r | CT   | 2       | 3       | 2      | TA -> CT | 127      | Substitution       | 34.60%            | 1.70E-111                     |
| Variants: VaAres1_A_FDSW210055060-2r | T    | 6       | 6       | 1      | G -> T   | 132      | SNP (transversion) | 34.80%            | 5.00E-112                     |

## Contig 24

| Variant                                            | Name         | Mini<br>mum | Maxi<br>mum | Le<br>ngt<br>h | Change                 | Cove<br>rage   | Polymorphis<br>m Type          | Variant<br>Freque<br>ncy | Variant P-Value<br>(approximate) | CDS                                                                   | product                                                           | Protein<br>Effect | protei<br>n_id     | Amino<br>Acid<br>Change |
|----------------------------------------------------|--------------|-------------|-------------|----------------|------------------------|----------------|--------------------------------|--------------------------|----------------------------------|-----------------------------------------------------------------------|-------------------------------------------------------------------|-------------------|--------------------|-------------------------|
| Variant:<br>VaAphrodite_A_FDSW210<br>055057-2r     | T            | 74          | 74          | 1              | C -> T                 | 586            | SNP<br>(transition)            | 47.80%                   | 0                                |                                                                       |                                                                   |                   |                    |                         |
| Variant:<br>VaAphrodite_A_FDSW210<br>055057-2r     | C            | 1998<br>75  | 1998<br>75  | 1              | A -> C                 | 214            | SNP<br>(transversion)          | 99.50%                   | 0                                | UDP-phosphate N-<br>acetylglucosaminyl 1-phosphate<br>transferase CDS | UDP-phosphate N-<br>acetylglucosaminyl 1-phosphate<br>transferase | Substit<br>ution  | KLI7<br>0639.<br>1 | M -> R                  |
| Variant:<br>VaAphrodite_B_FDSW210<br>055058-2r     | T            | 74          | 74          | 1              | C -> T                 | 530            | SNP<br>(transition)            | 50.60%                   | 0                                |                                                                       |                                                                   |                   |                    |                         |
| Variant:<br>VaAphrodite_B_FDSW210<br>055058-2r     | CGCA<br>TGAG | 2005<br>85  | 2005<br>84  | 0              | #NAME?                 | 236 -<br>> 240 | Insertion                      | 98.7% -><br>99.2%        | 0                                | UDP-phosphate N-<br>acetylglucosaminyl 1-phosphate<br>transferase CDS | UDP-phosphate N-<br>acetylglucosaminyl 1-phosphate<br>transferase | Frame<br>Shift    | KLI70639.1         |                         |
| Variant:<br>VaAphrodite_C_FDSW210<br>055059-1r     | T            | 74          | 74          | 1              | C -> T                 | 529            | SNP<br>(transition)            | 59.00%                   | 0                                |                                                                       |                                                                   |                   |                    |                         |
| Variant:<br>VaAphrodite_C_FDSW210055059-1r         |              | 1892<br>38  | 1892<br>41  | 4              | (AAAG)3 -<br>> (AAAG)2 | 222            | Deletion<br>(tandem<br>repeat) | 100.00%                  | 0                                | hypothetical protein CDS                                              | hypothetical protein                                              | Frame<br>Shift    | KLI70632.1         |                         |
| Variant:<br>VaAres1_A_FDSW210055<br>060-2r         | T            | 74          | 74          | 1              | C -> T                 | 360            | SNP<br>(transition)            | 49.70%                   | 2.90E-270                        |                                                                       |                                                                   |                   |                    |                         |
| Variant:<br>VaAres1_A_FDSW210055<br>060-2r         | A            | 7575<br>0   | 7575<br>0   | 1              | C -> A                 | 131            | SNP<br>(transversion)          | 26.70%                   | 1.90E-19                         |                                                                       |                                                                   |                   |                    |                         |
| Variant:<br>VaAres1_A_FDSW210055060-2r             |              | 1991<br>11  | 1991<br>12  | 2              | #NAME?                 | 122            | Deletion                       | 100.00%                  | 6.30E-196                        | hypothetical protein CDS                                              | hypothetical protein                                              | Frame<br>Shift    | KLI70638.1         |                         |
| Variant:<br>VaAres1_B_FDSW210055<br>061-2r         | T            | 74          | 74          | 1              | C -> T                 | 246            | SNP<br>(transition)            | 57.30%                   | 9.40E-282                        |                                                                       |                                                                   |                   |                    |                         |
| Variant:<br>VaAres1_B_FDSW210055<br>061-2r         | C            | 1998<br>78  | 1998<br>78  | 1              | T -> C                 | 177            | SNP<br>(transition)            | 100.00%                  | 0                                | UDP-phosphate N-<br>acetylglucosaminyl 1-phosphate<br>transferase CDS | UDP-phosphate N-<br>acetylglucosaminyl 1-phosphate<br>transferase | Substit<br>ution  | KLI7<br>0639.<br>1 | D -> G                  |
| Variant:<br>VaAres1_C_FDSW210055<br>062-1r         | T            | 74<br>1991  | 74<br>1991  | 1              | C -> T                 | 502            | SNP<br>(transition)            | 50.20%                   | 0                                |                                                                       |                                                                   |                   |                    |                         |
| Variant:<br>VaAres1_C_FDSW210055062-1r             |              | 11          | 12          | 2              | #NAME?                 | 155            | Deletion                       | 100.00%                  | 1.00E-248                        | hypothetical protein CDS                                              | hypothetical protein                                              | Frame<br>Shift    | KLI70638.1         |                         |
| Variant:<br>VaphiVaphiSt2_B_A_FDS<br>W210055054-2r | T            | 74          | 74          | 1              | C -> T                 | 330            | SNP<br>(transition)            | 48.20%                   | 7.10E-206                        |                                                                       |                                                                   |                   |                    |                         |
| Variant:<br>VaphiSt2_B_FDSW210055<br>056-1r        | T            | 74          | 74          | 1              | C -> T                 | 824            | SNP<br>(transition)            | 47.00%                   | 0                                |                                                                       |                                                                   |                   |                    |                         |

## Contig 25

| Variant<br>Name                                | Minimum | Maximum | Length | Change | Coverage        | Polymorphism<br>Type | Variant<br>Frequency         | Variant P-Value<br>(approximate) | CDS       | product                 | Protein<br>Effect    | protein_id     | Amino Acid<br>Change         |
|------------------------------------------------|---------|---------|--------|--------|-----------------|----------------------|------------------------------|----------------------------------|-----------|-------------------------|----------------------|----------------|------------------------------|
| Variant:<br>VaAphrodite_B_FDSW210055058-<br>2r | A       | 8289    | 8288   | 0      | (A)3 -><br>(A)4 | 185                  | Insertion (tandem<br>repeat) | 27.60%                           | 5.00E-128 | pheA CDS                | chorismate<br>mutase | Frame<br>Shift | KLI70447.1                   |
| Variant:<br>VaAphrodite_B_FDSW210055058-<br>2r | C       | 25651   | 25651  | 1      | T -> C          | 210                  | SNP (transition)             | 29.50%                           | 5.10E-176 | histidine kinase<br>CDS | histidine<br>kinase  | Substitution   | KLI7046<br>2.1<br><br>Y -> H |

## Contig 27

| Variant                                     | Name | Minimum | Maximum | Length | Change     | Coverage   | Polymorphism Type  | Variant Frequency | Variant P-Value (approximate) | CDS                      | product              | Protein Effect | protein_id  | Amino Acid Change |
|---------------------------------------------|------|---------|---------|--------|------------|------------|--------------------|-------------------|-------------------------------|--------------------------|----------------------|----------------|-------------|-------------------|
| Variant: VaAphrodite_A_FDSW210055057-2r     | AG   | 27267   | 27268   | 2      | TA -> AG   | 170 -> 186 | Substitution       | 24.7% -> 27.1%    | 1.40E-90                      | hypothetical protein CDS | hypothetical protein | Substitution   | KLI704 36.1 | L -> Q            |
| Variant: VaAphrodite_A_FDSW210055057-2r     | C    | 27269   | 27269   | 1      | A -> C     | 196        | SNP (transversion) | 37.80%            | 1.40E-167                     | hypothetical protein CDS | hypothetical protein | Substitution   | KLI704 36.1 | K -> Q            |
| Variant: VaAphrodite_B_FDSW210055058-2r     | AG   | 27267   | 27269   | 3      | TAA -> AGC | 145 -> 163 | Substitution       | 23.4% -> 33.1%    | 1.40E-79                      | hypothetical protein CDS | hypothetical protein | Substitution   | KLI704 36.1 | LK -> QQ          |
| Variant: VaAphrodite_C_FDSW210055059-1r     | C    | 27269   | 27269   | 1      | A -> C     | 263        | SNP (transversion) | 29.30%            | 5.10E-164                     | hypothetical protein CDS | hypothetical protein | Substitution   | KLI704 36.1 | K -> Q            |
| Variant: VaAres1_A_FDSW210055060-2r         | AG   | 27267   | 27269   | 3      | TAA -> AGC | 109 -> 127 | Substitution       | 21.1% -> 30.7%    | 4.90E-60                      | hypothetical protein CDS | hypothetical protein | Substitution   | KLI704 36.1 | LK -> QQ          |
| Variant: VaAres1_B_FDSW210055061-2r         | C    | 27269   | 27269   | 1      | A -> C     | 135        | SNP (transversion) | 33.30%            | 1.50E-126                     | hypothetical protein CDS | hypothetical protein | Substitution   | KLI704 36.1 | K -> Q            |
| Variant: VaAres1_C_FDSW210055062-1r         | C    | 27269   | 27269   | 1      | A -> C     | 170        | SNP (transversion) | 25.30%            | 4.70E-102                     | hypothetical protein CDS | hypothetical protein | Substitution   | KLI704 36.1 | K -> Q            |
| Variant: VaphiVaphiSt2_B_A_FDSW210055054-2r | C    | 27269   | 27269   | 1      | A -> C     | 142        | SNP (transversion) | 26.80%            | 1.90E-91                      | hypothetical protein CDS | hypothetical protein | Substitution   | KLI704 36.1 | K -> Q            |
| Variant: VaphiSt2_B_FDSW210055056-1r        | A    | 27267   | 27267   | 1      | T -> A     | 288        | SNP (transversion) | 25.70%            | 1.40E-167                     | hypothetical protein CDS | hypothetical protein | Substitution   | KLI704 36.1 | L -> Q            |
| Variant: VaphiSt2_B_FDSW210055056-1r        | C    | 27269   | 27269   | 1      | A -> C     | 333        | SNP (transversion) | 34.50%            | 6.50E-277                     | hypothetical protein CDS | hypothetical protein | Substitution   | KLI704 36.1 | K -> Q            |

## Contig 28

| Variant<br>Variants:                            | Name | Mini<br>mum | Maxi<br>mum | Len<br>gth | Change   | Coverag<br>e | Polymorphis<br>m Type | Variant<br>Frequency | Variant P-Value<br>(approximate) | CDS                         | product<br>calcium-binding protein | Protein<br>Effect | protein<br>_id | Amino Acid<br>Change |
|-------------------------------------------------|------|-------------|-------------|------------|----------|--------------|-----------------------|----------------------|----------------------------------|-----------------------------|------------------------------------|-------------------|----------------|----------------------|
| VaAphrodite_A_FDSW2100550<br>57-2r<br>Variants: | C    | 10111       | 10111       | 1          | T -> C   | 244          | SNP<br>(transition)   | 27.00%               | 1.20E-47                         | calcium-binding protein CDS | calcium-binding protein            | None              | KLI70416.1     |                      |
| VaAphrodite_A_FDSW2100550<br>57-2r<br>Variants: | C    | 10129       | 10129       | 1          | G -> C   | 311          | SNP<br>(transversion) | 39.50%               | 3.90E-146                        | calcium-binding protein CDS | calcium-binding protein            | None              | KLI70416.1     |                      |
| VaAphrodite_A_FDSW2100550<br>57-2r<br>Variants: | T    | 10145       | 10145       | 1          | C -> T   | 361          | SNP<br>(transition)   | 35.70%               | 7.00E-210                        | calcium-binding protein CDS | calcium-binding protein            | None              | KLI70416.1     |                      |
| VaAphrodite_A_FDSW2100550<br>57-2r<br>Variants: | C    | 10153       | 10153       | 1          | T -> C   | 375          | SNP<br>(transition)   | 33.60%               | 1.50E-238                        | calcium-binding protein CDS | calcium-binding protein            | None              | KLI70416.1     |                      |
| VaAphrodite_A_FDSW2100550<br>57-2r<br>Variants: | T    | 10159       | 10159       | 1          | C -> T   | 390          | SNP<br>(transition)   | 37.20%               | 1.70E-296                        | calcium-binding protein CDS | calcium-binding protein            | None              | KLI70416.1     |                      |
| VaAphrodite_A_FDSW2100550<br>57-2r<br>Variants: | A    | 10204       | 10204       | 1          | C -> A   | 556          | SNP<br>(transversion) | 39.00%               | 0                                | calcium-binding protein CDS | calcium-binding protein            | None              | KLI70416.1     |                      |
| VaAphrodite_A_FDSW2100550<br>57-2r<br>Variants: | TG   | 10255       | 10256       | 2          | GA -> TG | 721          | Substitution          | 35.90%               | 2.10E-292                        | calcium-binding protein CDS | calcium-binding protein            | Substitution      | KLI70416.1     | VT -> VA             |
| VaAphrodite_A_FDSW2100550<br>57-2r<br>Variants: | C    | 10273       | 10273       | 1          | T -> C   | 722          | SNP<br>(transition)   | 41.60%               | 0                                | calcium-binding protein CDS | calcium-binding protein            | None              | KLI70416.1     |                      |
| VaAphrodite_A_FDSW2100550<br>57-2r<br>Variants: | G    | 10282       | 10282       | 1          | C -> G   | 733          | SNP<br>(transversion) | 41.60%               | 0                                | calcium-binding protein CDS | calcium-binding protein            | None              | KLI70416.1     |                      |
| VaAphrodite_A_FDSW2100550<br>57-2r<br>Variants: | A    | 10288       | 10288       | 1          | G -> A   | 750          | SNP<br>(transition)   | 37.50%               | 0                                | calcium-binding protein CDS | calcium-binding protein            | None              | KLI70416.1     |                      |
| VaAphrodite_A_FDSW2100550<br>57-2r<br>Variants: | T    | 10315       | 10315       | 1          | C -> T   | 905          | SNP<br>(transition)   | 26.10%               | 0                                | calcium-binding protein CDS | calcium-binding protein            | None              | KLI70416.1     |                      |
| VaAphrodite_A_FDSW2100550<br>57-2r<br>Variants: | T    | 10322       | 10322       | 1          | G -> T   | 927          | SNP<br>(transversion) | 51.00%               | 0                                | calcium-binding protein CDS | calcium-binding protein            | Substitution      | KLI70416.1     | A -> S               |
| VaAphrodite_A_FDSW2100550<br>57-2r<br>Variants: | C    | 10333       | 10333       | 1          | T -> C   | 984          | SNP<br>(transition)   | 33.60%               | 0                                | calcium-binding protein CDS | calcium-binding protein            | None              | KLI70416.1     |                      |
| VaAphrodite_A_FDSW2100550<br>57-2r<br>Variants: | T    | 10351       | 10351       | 1          | A -> T   | 1055         | SNP<br>(transversion) | 31.70%               | 0                                | calcium-binding protein CDS | calcium-binding protein            | None              | KLI70416.1     |                      |
| VaAphrodite_A_FDSW2100550<br>57-2r<br>Variants: | A    | 10369       | 10369       | 1          | G -> A   | 1123         | SNP<br>(transition)   | 34.80%               | 0                                | calcium-binding protein CDS | calcium-binding protein            | None              | KLI70416.1     |                      |
| VaAphrodite_A_FDSW2100550<br>57-2r<br>Variants: | A    | 10387       | 10387       | 1          | G -> A   | 1175         | SNP<br>(transition)   | 46.40%               | 0                                | calcium-binding protein CDS | calcium-binding protein            | None              | KLI70416.1     |                      |
| VaAphrodite_A_FDSW2100550<br>57-2r<br>Variants: | C    | 10396       | 10396       | 1          | T -> C   | 1189         | SNP<br>(transition)   | 33.70%               | 0                                | calcium-binding protein CDS | calcium-binding protein            | None              | KLI70416.1     |                      |
| VaAphrodite_A_FDSW2100550<br>57-2r<br>Variants: | G    | 10405       | 10405       | 1          | C -> G   | 1209         | SNP<br>(transversion) | 50.20%               | 0                                | calcium-binding protein CDS | calcium-binding protein            | None              | KLI70416.1     |                      |
| VaAphrodite_A_FDSW2100550<br>57-2r<br>Variants: | G    | 10414       | 10414       | 1          | A -> G   | 1215         | SNP<br>(transition)   | 26.30%               | 0                                | calcium-binding protein CDS | calcium-binding protein            | None              | KLI70416.1     |                      |
| VaAphrodite_A_FDSW2100550<br>57-2r              | T    | 10429       | 10429       | 1          | C -> T   | 1229         | SNP<br>(transition)   | 29.70%               | 0                                | calcium-binding protein CDS | calcium-binding protein            | None              | KLI70416.1     |                      |

|                                                  |                |       |       |   |                             |                 |                                                  |                   |           |                                |                                |                  |                                    |
|--------------------------------------------------|----------------|-------|-------|---|-----------------------------|-----------------|--------------------------------------------------|-------------------|-----------|--------------------------------|--------------------------------|------------------|------------------------------------|
| Variables:<br>VaAphrodite_A_FDSW2100550<br>57-2r | T              | 10435 | 10435 | 1 | G -> T                      | 1207            | SNP<br>(transversio<br>n)                        | 25.70%            | 0         | calcium-binding<br>protein CDS | calcium-<br>binding<br>protein | None             | KLI70416.1                         |
| Variables:<br>VaAphrodite_A_FDSW2100550<br>57-2r | G              | 10441 | 10441 | 1 | A -> G                      | 1180            | SNP<br>(transition)<br>SNP<br>(transversio<br>n) | 47.80%            | 0         | calcium-binding<br>protein CDS | calcium-<br>binding<br>protein | None             | KLI70416.1                         |
| Variables:<br>VaAphrodite_A_FDSW2100550<br>57-2r | C              | 10444 | 10444 | 1 | A -> C                      | 1164            | SNP<br>(transversio<br>n)                        | 42.40%            | 0         | calcium-binding<br>protein CDS | calcium-<br>binding<br>protein | None             | KLI70416.1                         |
| Variables:<br>VaAphrodite_A_FDSW2100550<br>57-2r | ACC            | 10481 | 10483 | 2 | TCA -> ACC                  | 1064 -><br>1075 | Substitution                                     | 29.6% -><br>29.9% | 0         | calcium-binding<br>protein CDS | calcium-<br>binding<br>protein | Substitu<br>tion | KLI70<br>416.1      S -> T         |
| Variables:<br>VaAphrodite_A_FDSW2100550<br>57-2r | A              | 10534 | 10534 | 1 | G -> A                      | 951             | SNP<br>(transition)                              | 91.60%            | 0         | calcium-binding<br>protein CDS | calcium-<br>binding<br>protein | None             | KLI70416.1                         |
| Variables:<br>VaAphrodite_A_FDSW2100550<br>57-2r | C              | 10540 | 10540 | 1 | T -> C                      | 944             | SNP<br>(transition)<br>SNP<br>(transversio<br>n) | 95.40%            | 0         | calcium-binding<br>protein CDS | calcium-<br>binding<br>protein | None             | KLI70416.1                         |
| Variables:<br>VaAphrodite_A_FDSW2100550<br>57-2r | G              | 10543 | 10543 | 1 | C -> G                      | 923             | SNP<br>(transversio<br>n)                        | 30.10%            | 0         | calcium-binding<br>protein CDS | calcium-<br>binding<br>protein | None             | KLI70416.1                         |
| Variables:<br>VaAphrodite_A_FDSW2100550<br>57-2r | T              | 10546 | 10546 | 1 | C -> T                      | 922             | SNP<br>(transition)                              | 96.40%            | 0         | calcium-binding<br>protein CDS | calcium-<br>binding<br>protein | None             | KLI70416.1                         |
| Variables:<br>VaAphrodite_A_FDSW2100550<br>57-2r | AGCGGA<br>AACG | 10549 | 10558 | 9 | GTCCACTGTT -><br>AGCGGAAACG | 899 -><br>916   | Substitution<br>SNP<br>(transversio<br>n)        | 90.7% -><br>95.1% | 0         | calcium-binding<br>protein CDS | calcium-<br>binding<br>protein | Substitu<br>tion | KLI70<br>416.1      ESTV -<br>EAET |
| Variables:<br>VaAphrodite_A_FDSW2100550<br>57-2r | A              | 10564 | 10564 | 1 | C -> A                      | 889             | SNP<br>(transversio<br>n)                        | 75.00%            | 0         | calcium-binding<br>protein CDS | calcium-<br>binding<br>protein | None             | KLI70416.1                         |
| Variables:<br>VaAphrodite_A_FDSW2100550<br>57-2r | TTG            | 10568 | 10570 | 2 | CTA -> TTG                  | 872 -><br>878   | Substitution                                     | 97.8% -><br>97.9% | 0         | calcium-binding<br>protein CDS | calcium-<br>binding<br>protein | None             | KLI70416.1                         |
| Variables:<br>VaAphrodite_A_FDSW2100550<br>57-2r | T              | 10573 | 10573 | 1 | C -> T                      | 857             | SNP<br>(transition)<br>SNP<br>(transversio<br>n) | 98.70%            | 0         | calcium-binding<br>protein CDS | calcium-<br>binding<br>protein | None             | KLI70416.1                         |
| Variables:<br>VaAphrodite_A_FDSW2100550<br>57-2r | T              | 10576 | 10576 | 1 | G -> T                      | 848             | SNP<br>(transversio<br>n)                        | 98.50%            | 0         | calcium-binding<br>protein CDS | calcium-<br>binding<br>protein | None             | KLI70416.1                         |
| Variables:<br>VaAphrodite_A_FDSW2100550<br>57-2r | TCTC           | 10579 | 10582 | 3 | CTTG -> TCTC                | 817 -><br>829   | Substitution                                     | 98.4% -><br>98.5% | 0         | calcium-binding<br>protein CDS | calcium-<br>binding<br>protein | None             | KLI70416.1                         |
| Variables:<br>VaAphrodite_A_FDSW2100550<br>57-2r | T              | 10596 | 10596 | 1 | C -> T                      | 753             | SNP<br>(transition)                              | 99.10%            | 0         | calcium-binding<br>protein CDS | calcium-<br>binding<br>protein | Substitu<br>tion | KLI70<br>416.1      A -> V         |
| Variables:<br>VaAphrodite_A_FDSW2100550<br>57-2r | C              | 10609 | 10609 | 1 | T -> C                      | 670             | SNP<br>(transition)                              | 98.80%            | 0         | calcium-binding<br>protein CDS | calcium-<br>binding<br>protein | None             | KLI70416.1                         |
| Variables:<br>VaAphrodite_A_FDSW2100550<br>57-2r | A              | 10615 | 10615 | 1 | G -> A                      | 639             | SNP<br>(transition)<br>SNP<br>(transversio<br>n) | 98.70%            | 0         | calcium-binding<br>protein CDS | calcium-<br>binding<br>protein | None             | KLI70416.1                         |
| Variables:<br>VaAphrodite_B_FDSW2100550<br>58-2r | C              | 10129 | 10129 | 1 | G -> C                      | 237             | SNP<br>(transversio<br>n)                        | 37.10%            | 9.60E-111 | calcium-binding<br>protein CDS | calcium-<br>binding<br>protein | None             | KLI70416.1                         |
| Variables:<br>VaAphrodite_B_FDSW2100550<br>58-2r | T              | 10145 | 10145 | 1 | C -> T                      | 268             | SNP<br>(transition)                              | 28.70%            | 5.90E-125 | calcium-binding<br>protein CDS | calcium-<br>binding<br>protein | None             | KLI70416.1                         |
| Variables:<br>VaAphrodite_B_FDSW2100550<br>58-2r | C              | 10153 | 10153 | 1 | T -> C                      | 285             | SNP<br>(transition)                              | 32.30%            | 9.70E-173 | calcium-binding<br>protein CDS | calcium-<br>binding<br>protein | None             | KLI70416.1                         |
| Variables:<br>VaAphrodite_B_FDSW2100550<br>58-2r | T              | 10159 | 10159 | 1 | C -> T                      | 296             | SNP<br>(transition)<br>SNP<br>(transversio<br>n) | 34.50%            | 5.60E-205 | calcium-binding<br>protein CDS | calcium-<br>binding<br>protein | None             | KLI70416.1                         |
| Variables:<br>VaAphrodite_B_FDSW2100550<br>58-2r | A              | 10204 | 10204 | 1 | C -> A                      | 343             | SNP<br>(transversio<br>n)                        | 38.50%            | 0         | calcium-binding<br>protein CDS | calcium-<br>binding<br>protein | None             | KLI70416.1                         |

|                                                  |    |       |       |   |          |               |                    |                   |           |                             |                         |              |            |          |
|--------------------------------------------------|----|-------|-------|---|----------|---------------|--------------------|-------------------|-----------|-----------------------------|-------------------------|--------------|------------|----------|
| Variables:<br>VaAphrodite_B_FDSW2100550<br>58-2r | TG | 10255 | 10256 | 2 | GA -> TG | 431 -><br>432 |                    | 30.2% -><br>30.3% | 1.90E-112 | calcium-binding protein CDS | calcium-binding protein | Substitution | KLI70416.1 | VT -> VA |
| Variables:<br>VaAphrodite_B_FDSW2100550<br>58-2r | C  | 10273 | 10273 | 1 | T -> C   | 445           | SNP (transition)   | 41.30%            | 7.40E-295 | calcium-binding protein CDS | calcium-binding protein | None         | KLI70416.1 |          |
| Variables:<br>VaAphrodite_B_FDSW2100550<br>58-2r | G  | 10282 | 10282 | 1 | C -> G   | 446           | SNP (transversion) | 40.40%            | 4.40E-286 | calcium-binding protein CDS | calcium-binding protein | None         | KLI70416.1 |          |
| Variables:<br>VaAphrodite_B_FDSW2100550<br>58-2r | A  | 10288 | 10288 | 1 | G -> A   | 469           | SNP (transition)   | 36.90%            | 1.70E-181 | calcium-binding protein CDS | calcium-binding protein | None         | KLI70416.1 |          |
| Variables:<br>VaAphrodite_B_FDSW2100550<br>58-2r | T  | 10315 | 10315 | 1 | C -> T   | 592           | SNP (transition)   | 28.90%            | 5.70E-225 | calcium-binding protein CDS | calcium-binding protein | None         | KLI70416.1 |          |
| Variables:<br>VaAphrodite_B_FDSW2100550<br>58-2r | T  | 10318 | 10318 | 1 | C -> T   | 613           | SNP (transition)   | 25.10%            | 4.40E-162 | calcium-binding protein CDS | calcium-binding protein | None         | KLI70416.1 |          |
| Variables:<br>VaAphrodite_B_FDSW2100550<br>58-2r | T  | 10322 | 10322 | 1 | G -> T   | 639           | SNP (transversion) | 53.40%            | 0         | calcium-binding protein CDS | calcium-binding protein | Substitution | KLI70416.1 | A -> S   |
| Variables:<br>VaAphrodite_B_FDSW2100550<br>58-2r | C  | 10333 | 10333 | 1 | T -> C   | 702           | SNP (transition)   | 39.50%            | 0         | calcium-binding protein CDS | calcium-binding protein | None         | KLI70416.1 |          |
| Variables:<br>VaAphrodite_B_FDSW2100550<br>58-2r | T  | 10351 | 10351 | 1 | A -> T   | 769           | SNP (transversion) | 29.10%            | 0         | calcium-binding protein CDS | calcium-binding protein | None         | KLI70416.1 |          |
| Variables:<br>VaAphrodite_B_FDSW2100550<br>58-2r | A  | 10369 | 10369 | 1 | G -> A   | 821           | SNP (transition)   | 33.40%            | 0         | calcium-binding protein CDS | calcium-binding protein | None         | KLI70416.1 |          |
| Variables:<br>VaAphrodite_B_FDSW2100550<br>58-2r | A  | 10387 | 10387 | 1 | G -> A   | 857           | SNP (transition)   | 45.70%            | 0         | calcium-binding protein CDS | calcium-binding protein | None         | KLI70416.1 |          |
| Variables:<br>VaAphrodite_B_FDSW2100550<br>58-2r | C  | 10396 | 10396 | 1 | T -> C   | 869           | SNP (transition)   | 28.90%            | 0         | calcium-binding protein CDS | calcium-binding protein | None         | KLI70416.1 |          |
| Variables:<br>VaAphrodite_B_FDSW2100550<br>58-2r | G  | 10405 | 10405 | 1 | C -> G   | 884           | SNP (transversion) | 45.10%            | 0         | calcium-binding protein CDS | calcium-binding protein | None         | KLI70416.1 |          |
| Variables:<br>VaAphrodite_B_FDSW2100550<br>58-2r | T  | 10429 | 10429 | 1 | C -> T   | 901           | SNP (transition)   | 25.30%            | 0         | calcium-binding protein CDS | calcium-binding protein | None         | KLI70416.1 |          |
| Variables:<br>VaAphrodite_B_FDSW2100550<br>58-2r | GT | 10434 | 10435 | 2 | CG -> GT | 910 -><br>913 | Substitution       | 25.6% -><br>25.7% | 5.70E-295 | calcium-binding protein CDS | calcium-binding protein | Substitution | KLI70416.1 | T -> S   |
| Variables:<br>VaAphrodite_B_FDSW2100550<br>58-2r | G  | 10441 | 10441 | 1 | A -> G   | 913           | SNP (transition)   | 40.40%            | 0         | calcium-binding protein CDS | calcium-binding protein | None         | KLI70416.1 |          |
| Variables:<br>VaAphrodite_B_FDSW2100550<br>58-2r | C  | 10444 | 10444 | 1 | A -> C   | 910           | SNP (transversion) | 45.90%            | 0         | calcium-binding protein CDS | calcium-binding protein | None         | KLI70416.1 |          |
| Variables:<br>VaAphrodite_B_FDSW2100550<br>58-2r | G  | 10468 | 10468 | 1 | A -> G   | 920           | SNP (transition)   | 28.30%            | 0         | calcium-binding protein CDS | calcium-binding protein | None         | KLI70416.1 |          |
| Variables:<br>VaAphrodite_B_FDSW2100550<br>58-2r | AT | 10470 | 10471 | 2 | GC -> AT | 915 -><br>920 | Substitution       | 27.7% -><br>27.8% | 0         | calcium-binding protein CDS | calcium-binding protein | Substitution | KLI70416.1 | S -> N   |
| Variables:<br>VaAphrodite_B_FDSW2100550<br>58-2r | A  | 10481 | 10481 | 1 | T -> A   | 922           | SNP (transversion) | 47.30%            | 0         | calcium-binding protein CDS | calcium-binding protein | Substitution | KLI70416.1 | S -> T   |
| Variables:<br>VaAphrodite_B_FDSW2100550<br>58-2r | C  | 10486 | 10486 | 1 | T -> C   | 916           | SNP (transition)   | 34.50%            | 0         | calcium-binding protein CDS | calcium-binding protein | None         | KLI70416.1 |          |
| Variables:<br>VaAphrodite_B_FDSW2100550<br>58-2r | C  | 10498 | 10498 | 1 | T -> C   | 932           | SNP (transition)   | 41.70%            | 0         | calcium-binding protein CDS | calcium-binding protein | None         | KLI70416.1 |          |

|                                                  |                |       |       |   |                             |               |                                       |                   |           |                                |                            |              |                |                 |
|--------------------------------------------------|----------------|-------|-------|---|-----------------------------|---------------|---------------------------------------|-------------------|-----------|--------------------------------|----------------------------|--------------|----------------|-----------------|
| Variables:<br>VaAphrodite_B_FDSW2100550<br>58-2r | A              | 10534 | 10534 | 1 | G -> A                      | 975           | SNP<br>(transition)                   | 93.70%            | 0         | calcium-binding<br>protein CDS | calcium-binding<br>protein | None         | KLI70416.1     |                 |
| Variables:<br>VaAphrodite_B_FDSW2100550<br>58-2r | C              | 10540 | 10540 | 1 | T -> C                      | 972           | SNP<br>(transition)                   | 97.10%            | 0         | calcium-binding<br>protein CDS | calcium-binding<br>protein | None         | KLI70416.1     |                 |
| Variables:<br>VaAphrodite_B_FDSW2100550<br>58-2r | G              | 10543 | 10543 | 1 | C -> G                      | 961           | SNP<br>(transversion)                 | 48.80%            | 0         | calcium-binding<br>protein CDS | calcium-binding<br>protein | None         | KLI70416.1     |                 |
| Variables:<br>VaAphrodite_B_FDSW2100550<br>58-2r | T              | 10546 | 10546 | 1 | C -> T                      | 963           | SNP<br>(transition)                   | 97.20%            | 0         | calcium-binding<br>protein CDS | calcium-binding<br>protein | None         | KLI70416.1     |                 |
| Variables:<br>VaAphrodite_B_FDSW2100550<br>58-2r | AGCGGA<br>AACG | 10549 | 10558 | 9 | GTCCACTGTT -><br>AGCGGAAACG | 952 -><br>963 | Substitution<br>SNP<br>(transversion) | 94.2% -><br>96.3% | 0         | calcium-binding<br>protein CDS | calcium-binding<br>protein | Substitution | KLI70<br>416.1 | ESTV -><br>EAET |
| Variables:<br>VaAphrodite_B_FDSW2100550<br>58-2r | A              | 10564 | 10564 | 1 | C -> A                      | 944           | SNP<br>(transversion)                 | 57.70%            | 0         | calcium-binding<br>protein CDS | calcium-binding<br>protein | None         | KLI70416.1     |                 |
| Variables:<br>VaAphrodite_B_FDSW2100550<br>58-2r | G              | 10564 | 10564 | 1 | C -> G                      | 944           | SNP<br>(transversion)                 | 39.90%            | 0         | calcium-binding<br>protein CDS | calcium-binding<br>protein | None         | KLI70416.1     |                 |
| Variables:<br>VaAphrodite_B_FDSW2100550<br>58-2r | A              | 10567 | 10567 | 1 | G -> A                      | 952           | SNP<br>(transition)                   | 39.20%            | 0         | calcium-binding<br>protein CDS | calcium-binding<br>protein | None         | KLI70416.1     |                 |
| Variables:<br>VaAphrodite_B_FDSW2100550<br>58-2r | TTG            | 10568 | 10570 | 2 | CTA -> TTG                  | 936 -><br>950 | Substitution                          | 96.80%            | 0         | calcium-binding<br>protein CDS | calcium-binding<br>protein | None         | KLI70416.1     |                 |
| Variables:<br>VaAphrodite_B_FDSW2100550<br>58-2r | T              | 10573 | 10573 | 1 | C -> T                      | 933           | SNP<br>(transition)                   | 98.40%            | 0         | calcium-binding<br>protein CDS | calcium-binding<br>protein | None         | KLI70416.1     |                 |
| Variables:<br>VaAphrodite_B_FDSW2100550<br>58-2r | T              | 10576 | 10576 | 1 | G -> T                      | 925           | SNP<br>(transversion)                 | 98.40%            | 0         | calcium-binding<br>protein CDS | calcium-binding<br>protein | None         | KLI70416.1     |                 |
| Variables:<br>VaAphrodite_B_FDSW2100550<br>58-2r | TCTC           | 10579 | 10582 | 3 | CTTG -> TCTC                | 922 -><br>925 | Substitution                          | 69.8% -><br>70.6% | 0         | calcium-binding<br>protein CDS | calcium-binding<br>protein | None         | KLI70416.1     |                 |
| Variables:<br>VaAphrodite_B_FDSW2100550<br>58-2r | TCTT           | 10579 | 10582 | 3 | CTTG -> TCTT                | 922 -><br>925 | Substitution                          | 25.8% -><br>25.9% | 0         | calcium-binding<br>protein CDS | calcium-binding<br>protein | None         | KLI70416.1     |                 |
| Variables:<br>VaAphrodite_B_FDSW2100550<br>58-2r | T              | 10596 | 10596 | 1 | C -> T                      | 890           | SNP<br>(transition)                   | 97.30%            | 0         | calcium-binding<br>protein CDS | calcium-binding<br>protein | Substitution | KLI70<br>416.1 | A -> V          |
| Variables:<br>VaAphrodite_B_FDSW2100550<br>58-2r | C              | 10609 | 10609 | 1 | T -> C                      | 812           | SNP<br>(transition)                   | 95.90%            | 0         | calcium-binding<br>protein CDS | calcium-binding<br>protein | None         | KLI70416.1     |                 |
| Variables:<br>VaAphrodite_B_FDSW2100550<br>58-2r | A              | 10615 | 10615 | 1 | G -> A                      | 774           | SNP<br>(transition)                   | 96.10%            | 0         | calcium-binding<br>protein CDS | calcium-binding<br>protein | None         | KLI70416.1     |                 |
| Variables:<br>VaAphrodite_C_FDSW2100550<br>59-1r | C              | 10129 | 10129 | 1 | G -> C                      | 307           | SNP<br>(transversion)                 | 43.30%            | 9.70E-191 | calcium-binding<br>protein CDS | calcium-binding<br>protein | None         | KLI70416.1     |                 |
| Variables:<br>VaAphrodite_C_FDSW2100550<br>59-1r | T              | 10145 | 10145 | 1 | C -> T                      | 365           | SNP<br>(transition)                   | 37.50%            | 5.20E-240 | calcium-binding<br>protein CDS | calcium-binding<br>protein | None         | KLI70416.1     |                 |
| Variables:<br>VaAphrodite_C_FDSW2100550<br>59-1r | C              | 10153 | 10153 | 1 | T -> C                      | 394           | SNP<br>(transition)                   | 38.30%            | 3.5E-311  | calcium-binding<br>protein CDS | calcium-binding<br>protein | None         | KLI70416.1     |                 |
| Variables:<br>VaAphrodite_C_FDSW2100550<br>59-1r | T              | 10159 | 10159 | 1 | C -> T                      | 411           | SNP<br>(transition)                   | 41.10%            | 0         | calcium-binding<br>protein CDS | calcium-binding<br>protein | None         | KLI70416.1     |                 |
| Variables:<br>VaAphrodite_C_FDSW2100550<br>59-1r | A              | 10204 | 10204 | 1 | C -> A                      | 505           | SNP<br>(transversion)                 | 44.00%            | 0         | calcium-binding<br>protein CDS | calcium-binding<br>protein | None         | KLI70416.1     |                 |
| Variables:<br>VaAphrodite_C_FDSW2100550<br>59-1r | TG             | 10255 | 10256 | 2 | GA -> TG                    | 633 -><br>639 | Substitution                          | 26.2% -><br>26.8% | 1.70E-131 | calcium-binding<br>protein CDS | calcium-binding<br>protein | Substitution | KLI70<br>416.1 | VT -> VA        |



|                                 |            |               |             |              |                      |                                 |                       |                |                             |                         |              |            |        |
|---------------------------------|------------|---------------|-------------|--------------|----------------------|---------------------------------|-----------------------|----------------|-----------------------------|-------------------------|--------------|------------|--------|
| SNP ID                          | Chromosome | Position (kb) | RefSeq Gene | Variant Type | Allele Frequency (%) | Phylogenetic Conservation Score | Conservation Category | Protein Domain | Protein Function            | Pathway                 |              |            |        |
| VaAphrodite_C_FDSW2100550-59-1r | C          | 10273         | 10273       | T -> C       | 654                  | SNP (transition)                | 36.90%                | 0              | calcium-binding protein CDS | calcium-binding protein | None         | KLI70416.1 |        |
| VaAphrodite_C_FDSW2100550-59-1r | G          | 10282         | 10282       | C -> G       | 671                  | SNP (transversion)              | 36.80%                | 0              | calcium-binding protein CDS | calcium-binding protein | None         | KLI70416.1 |        |
| VaAphrodite_C_FDSW2100550-59-1r | A          | 10288         | 10288       | G -> A       | 694                  | SNP (transition)                | 32.60%                | 4.70E-266      | calcium-binding protein CDS | calcium-binding protein | None         | KLI70416.1 |        |
| VaAphrodite_C_FDSW2100550-59-1r | T          | 10315         | 10315       | C -> T       | 900                  | SNP (transition)                | 27.80%                | 0              | calcium-binding protein CDS | calcium-binding protein | None         | KLI70416.1 |        |
| VaAphrodite_C_FDSW2100550-59-1r | T          | 10322         | 10322       | G -> T       | 957                  | SNP (transversion)              | 48.20%                | 0              | calcium-binding protein CDS | calcium-binding protein | Substitution | KLI70416.1 | A -> S |
| VaAphrodite_C_FDSW2100550-59-1r | C          | 10333         | 10333       | T -> C       | 1025                 | SNP (transition)                | 32.90%                | 0              | calcium-binding protein CDS | calcium-binding protein | None         | KLI70416.1 |        |
| VaAphrodite_C_FDSW2100550-59-1r | T          | 10351         | 10351       | A -> T       | 1134                 | SNP (transversion)              | 35.40%                | 0              | calcium-binding protein CDS | calcium-binding protein | None         | KLI70416.1 |        |
| VaAphrodite_C_FDSW2100550-59-1r | A          | 10369         | 10369       | G -> A       | 1218                 | SNP (transition)                | 34.70%                | 0              | calcium-binding protein CDS | calcium-binding protein | None         | KLI70416.1 |        |
| VaAphrodite_C_FDSW2100550-59-1r | A          | 10387         | 10387       | G -> A       | 1258                 | SNP (transition)                | 45.90%                | 0              | calcium-binding protein CDS | calcium-binding protein | None         | KLI70416.1 |        |
| VaAphrodite_C_FDSW2100550-59-1r | C          | 10396         | 10396       | T -> C       | 1291                 | SNP (transition)                | 35.20%                | 0              | calcium-binding protein CDS | calcium-binding protein | None         | KLI70416.1 |        |
| VaAphrodite_C_FDSW2100550-59-1r | G          | 10405         | 10405       | C -> G       | 1322                 | SNP (transversion)              | 52.60%                | 0              | calcium-binding protein CDS | calcium-binding protein | None         | KLI70416.1 |        |
| VaAphrodite_C_FDSW2100550-59-1r | G          | 10414         | 10414       | A -> G       | 1338                 | SNP (transition)                | 26.00%                | 0              | calcium-binding protein CDS | calcium-binding protein | None         | KLI70416.1 |        |
| VaAphrodite_C_FDSW2100550-59-1r | T          | 10429         | 10429       | C -> T       | 1364                 | SNP (transition)                | 28.40%                | 0              | calcium-binding protein CDS | calcium-binding protein | None         | KLI70416.1 |        |
| VaAphrodite_C_FDSW2100550-59-1r | T          | 10435         | 10435       | G -> T       | 1358                 | SNP (transversion)              | 26.10%                | 0              | calcium-binding protein CDS | calcium-binding protein | None         | KLI70416.1 |        |
| VaAphrodite_C_FDSW2100550-59-1r | G          | 10441         | 10441       | A -> G       | 1320                 | SNP (transition)                | 43.90%                | 0              | calcium-binding protein CDS | calcium-binding protein | None         | KLI70416.1 |        |
| VaAphrodite_C_FDSW2100550-59-1r | C          | 10444         | 10444       | A -> C       | 1326                 | SNP (transversion)              | 46.50%                | 0              | calcium-binding protein CDS | calcium-binding protein | None         | KLI70416.1 |        |
| VaAphrodite_C_FDSW2100550-59-1r | G          | 10468         | 10468       | A -> G       | 1297                 | SNP (transition)                | 26.90%                | 0              | calcium-binding protein CDS | calcium-binding protein | None         | KLI70416.1 |        |
| VaAphrodite_C_FDSW2100550-59-1r | AT         | 10470         | 10471       | GC -> AT     | 1302 -> 1304         | Substitution SNP (transversion) | 26.5% -> 26.6%        | 0              | calcium-binding protein CDS | calcium-binding protein | Substitution | KLI70416.1 | S -> N |
| VaAphrodite_C_FDSW2100550-59-1r | A          | 10481         | 10481       | T -> A       | 1290                 | SNP (transversion)              | 44.30%                | 0              | calcium-binding protein CDS | calcium-binding protein | Substitution | KLI70416.1 | S -> T |
| VaAphrodite_C_FDSW2100550-59-1r | C          | 10486         | 10486       | T -> C       | 1306                 | SNP (transition)                | 32.70%                | 0              | calcium-binding protein CDS | calcium-binding protein | None         | KLI70416.1 |        |
| VaAphrodite_C_FDSW2100550-59-1r | C          | 10498         | 10498       | T -> C       | 1322                 | SNP (transition)                | 42.20%                | 0              | calcium-binding protein CDS | calcium-binding protein | None         | KLI70416.1 |        |
| VaAphrodite_C_FDSW2100550-59-1r | A          | 10534         | 10534       | G -> A       | 1362                 | SNP (transition)                | 93.10%                | 0              | calcium-binding protein CDS | calcium-binding protein | None         | KLI70416.1 |        |

|                                                 |                |       |       |   |                             |                 |                                                  |                   |           |                                |                                |                  |                |                 |
|-------------------------------------------------|----------------|-------|-------|---|-----------------------------|-----------------|--------------------------------------------------|-------------------|-----------|--------------------------------|--------------------------------|------------------|----------------|-----------------|
| Variants:<br>VaAphrodite_C_FDSW2100550<br>59-1r | C              | 10540 | 10540 | 1 | T -> C                      | 1347            | SNP<br>(transition)                              | 95.80%            | 0         | calcium-binding<br>protein CDS | calcium-<br>binding<br>protein | None             | KLI70416.1     |                 |
| Variants:<br>VaAphrodite_C_FDSW2100550<br>59-1r | G              | 10543 | 10543 | 1 | C -> G                      | 1343            | SNP<br>(transversio<br>n)                        | 50.10%            | 0         | calcium-binding<br>protein CDS | calcium-<br>binding<br>protein | None             | KLI70416.1     |                 |
| Variants:<br>VaAphrodite_C_FDSW2100550<br>59-1r | T              | 10546 | 10546 | 1 | C -> T                      | 1330            | SNP<br>(transition)                              | 96.20%            | 0         | calcium-binding<br>protein CDS | calcium-<br>binding<br>protein | None             | KLI70416.1     |                 |
| Variants:<br>VaAphrodite_C_FDSW2100550<br>59-1r | AGCGGA<br>AACG | 10549 | 10558 | 9 | GTCCACTGTT -><br>AGCGGAAACG | 1307 -><br>1325 | Substitution<br>SNP<br>(transversio<br>n)        | 93.8% -><br>96.0% | 0         | calcium-binding<br>protein CDS | calcium-<br>binding<br>protein | Substitu<br>tion | KLI70<br>416.1 | ESTV -><br>EAET |
| Variants:<br>VaAphrodite_C_FDSW2100550<br>59-1r | A              | 10564 | 10564 | 1 | C -> A                      | 1302            | SNP<br>(transversio<br>n)                        | 55.90%            | 0         | calcium-binding<br>protein CDS | calcium-<br>binding<br>protein | None             | KLI70416.1     |                 |
| Variants:<br>VaAphrodite_C_FDSW2100550<br>59-1r | G              | 10564 | 10564 | 1 | C -> G                      | 1302            | SNP<br>(transversio<br>n)                        | 41.90%            | 0         | calcium-binding<br>protein CDS | calcium-<br>binding<br>protein | None             | KLI70416.1     |                 |
| Variants:<br>VaAphrodite_C_FDSW2100550<br>59-1r | A              | 10567 | 10567 | 1 | G -> A                      | 1294            | SNP<br>(transition)                              | 40.80%            | 0         | calcium-binding<br>protein CDS | calcium-<br>binding<br>protein | None             | KLI70416.1     |                 |
| Variants:<br>VaAphrodite_C_FDSW2100550<br>59-1r | TTG            | 10568 | 10570 | 2 | CTA -> TTG                  | 1280 -><br>1289 | Substitution                                     | 97.7% -><br>97.8% | 0         | calcium-binding<br>protein CDS | calcium-<br>binding<br>protein | None             | KLI70416.1     |                 |
| Variants:<br>VaAphrodite_C_FDSW2100550<br>59-1r | T              | 10573 | 10573 | 1 | C -> T                      | 1284            | SNP<br>(transition)<br>SNP<br>(transversio<br>n) | 97.50%            | 0         | calcium-binding<br>protein CDS | calcium-<br>binding<br>protein | None             | KLI70416.1     |                 |
| Variants:<br>VaAphrodite_C_FDSW2100550<br>59-1r | T              | 10576 | 10576 | 1 | G -> T                      | 1288            | SNP<br>(transversio<br>n)                        | 98.10%            | 0         | calcium-binding<br>protein CDS | calcium-<br>binding<br>protein | None             | KLI70416.1     |                 |
| Variants:<br>VaAphrodite_C_FDSW2100550<br>59-1r | TC             | 10579 | 10580 | 2 | CT -> TC                    | 1276 -><br>1281 | Substitution                                     | 25.4% -><br>26.1% | 0         | calcium-binding<br>protein CDS | calcium-<br>binding<br>protein | None             | KLI70416.1     |                 |
| Variants:<br>VaAphrodite_C_FDSW2100550<br>59-1r | TCTC           | 10579 | 10582 | 3 | CTTG -> TCTC                | 1276 -><br>1285 | Substitution                                     | 71.6% -><br>72.3% | 0         | calcium-binding<br>protein CDS | calcium-<br>binding<br>protein | None             | KLI70416.1     |                 |
| Variants:<br>VaAphrodite_C_FDSW2100550<br>59-1r | T              | 10596 | 10596 | 1 | C -> T                      | 1222            | SNP<br>(transition)                              | 97.50%            | 0         | calcium-binding<br>protein CDS | calcium-<br>binding<br>protein | Substitu<br>tion | KLI70<br>416.1 | A -> V          |
| Variants:<br>VaAphrodite_C_FDSW2100550<br>59-1r | C              | 10609 | 10609 | 1 | T -> C                      | 1077            | SNP<br>(transition)                              | 98.10%            | 0         | calcium-binding<br>protein CDS | calcium-<br>binding<br>protein | None             | KLI70416.1     |                 |
| Variants:<br>VaAphrodite_C_FDSW2100550<br>59-1r | A              | 10615 | 10615 | 1 | G -> A                      | 1022            | SNP<br>(transition)                              | 97.90%            | 0         | calcium-binding<br>protein CDS | calcium-<br>binding<br>protein | None             | KLI70416.1     |                 |
| Variants:<br>VaAphrodite_C_FDSW2100550<br>59-1r | AAG            | 10630 | 10632 | 3 | CTC -> AAG                  | 869 -><br>888   | Substitution<br>SNP<br>(transversio<br>n)        | 27.3% -><br>27.7% | 0         | calcium-binding<br>protein CDS | calcium-<br>binding<br>protein | None             | KLI70416.1     |                 |
| Variants:<br>VaAres1_A_FDSW210055060-<br>2r     | C              | 10129 | 10129 | 1 | G -> C                      | 169             | SNP<br>(transition)                              | 42.00%            | 2.00E-94  | calcium-binding<br>protein CDS | calcium-<br>binding<br>protein | None             | KLI70416.1     |                 |
| Variants:<br>VaAres1_A_FDSW210055060-<br>2r     | T              | 10145 | 10145 | 1 | C -> T                      | 193             | SNP<br>(transition)                              | 34.70%            | 1.70E-115 | calcium-binding<br>protein CDS | calcium-<br>binding<br>protein | None             | KLI70416.1     |                 |
| Variants:<br>VaAres1_A_FDSW210055060-<br>2r     | C              | 10153 | 10153 | 1 | T -> C                      | 212             | SNP<br>(transition)                              | 40.10%            | 1.50E-186 | calcium-binding<br>protein CDS | calcium-<br>binding<br>protein | None             | KLI70416.1     |                 |
| Variants:<br>VaAres1_A_FDSW210055060-<br>2r     | T              | 10159 | 10159 | 1 | C -> T                      | 223             | SNP<br>(transition)<br>SNP<br>(transversio<br>n) | 43.50%            | 4.70E-217 | calcium-binding<br>protein CDS | calcium-<br>binding<br>protein | None             | KLI70416.1     |                 |
| Variants:<br>VaAres1_A_FDSW210055060-<br>2r     | A              | 10204 | 10204 | 1 | C -> A                      | 298             | SNP<br>(transversio<br>n)                        | 46.00%            | 0         | calcium-binding<br>protein CDS | calcium-<br>binding<br>protein | None             | KLI70416.1     |                 |
| Variants:<br>VaAres1_A_FDSW210055060-<br>2r     | TG             | 10255 | 10256 | 2 | GA -> TG                    | 418 -><br>420   | Substitution                                     | 29.9% -><br>30.0% | 2.10E-106 | calcium-binding<br>protein CDS | calcium-<br>binding<br>protein | Substitu<br>tion | KLI70<br>416.1 | VT -> VA        |

|                                          |                |       |       |   |                          |            |                    |                |           |                             |                         |              |            |
|------------------------------------------|----------------|-------|-------|---|--------------------------|------------|--------------------|----------------|-----------|-----------------------------|-------------------------|--------------|------------|
| Variables:<br>VaAres1_A_FDSW210055060-2r | C              | 10273 | 10273 | 1 | T -> C                   | 425        | SNP (transition)   | 36.70%         | 3.60E-240 | calcium-binding protein CDS | calcium-binding protein | None         | KLI70416.1 |
| Variables:<br>VaAres1_A_FDSW210055060-2r | G              | 10282 | 10282 | 1 | C -> G                   | 429        | SNP (transversion) | 35.90%         | 2.70E-235 | calcium-binding protein CDS | calcium-binding protein | None         | KLI70416.1 |
| Variables:<br>VaAres1_A_FDSW210055060-2r | A              | 10288 | 10288 | 1 | G -> A                   | 450        | SNP (transition)   | 33.60%         | 1.00E-180 | calcium-binding protein CDS | calcium-binding protein | None         | KLI70416.1 |
| Variables:<br>VaAres1_A_FDSW210055060-2r | T              | 10315 | 10315 | 1 | C -> T                   | 555        | SNP (transition)   | 28.30%         | 1.30E-251 | calcium-binding protein CDS | calcium-binding protein | None         | KLI70416.1 |
| Variables:<br>VaAres1_A_FDSW210055060-2r | T              | 10322 | 10322 | 1 | G -> T                   | 583        | SNP (transversion) | 47.00%         | 0         | calcium-binding protein CDS | calcium-binding protein | Substitution | KLI70416.1 |
| Variables:<br>VaAres1_A_FDSW210055060-2r | C              | 10333 | 10333 | 1 | T -> C                   | 613        | SNP (transition)   | 30.80%         | 4.40E-236 | calcium-binding protein CDS | calcium-binding protein | None         | KLI70416.1 |
| Variables:<br>VaAres1_A_FDSW210055060-2r | T              | 10351 | 10351 | 1 | A -> T                   | 681        | SNP (transversion) | 31.60%         | 0         | calcium-binding protein CDS | calcium-binding protein | None         | KLI70416.1 |
| Variables:<br>VaAres1_A_FDSW210055060-2r | A              | 10369 | 10369 | 1 | G -> A                   | 693        | SNP (transition)   | 36.20%         | 0         | calcium-binding protein CDS | calcium-binding protein | None         | KLI70416.1 |
| Variables:<br>VaAres1_A_FDSW210055060-2r | A              | 10387 | 10387 | 1 | G -> A                   | 722        | SNP (transition)   | 41.60%         | 0         | calcium-binding protein CDS | calcium-binding protein | None         | KLI70416.1 |
| Variables:<br>VaAres1_A_FDSW210055060-2r | C              | 10396 | 10396 | 1 | T -> C                   | 741        | SNP (transition)   | 33.20%         | 0         | calcium-binding protein CDS | calcium-binding protein | None         | KLI70416.1 |
| Variables:<br>VaAres1_A_FDSW210055060-2r | G              | 10405 | 10405 | 1 | C -> G                   | 745        | SNP (transversion) | 50.60%         | 0         | calcium-binding protein CDS | calcium-binding protein | None         | KLI70416.1 |
| Variables:<br>VaAres1_A_FDSW210055060-2r | G              | 10414 | 10414 | 1 | A -> G                   | 751        | SNP (transition)   | 26.00%         | 1.10E-303 | calcium-binding protein CDS | calcium-binding protein | None         | KLI70416.1 |
| Variables:<br>VaAres1_A_FDSW210055060-2r | T              | 10429 | 10429 | 1 | C -> T                   | 758        | SNP (transition)   | 29.60%         | 0         | calcium-binding protein CDS | calcium-binding protein | None         | KLI70416.1 |
| Variables:<br>VaAres1_A_FDSW210055060-2r | G              | 10441 | 10441 | 1 | A -> G                   | 738        | SNP (transition)   | 46.30%         | 0         | calcium-binding protein CDS | calcium-binding protein | None         | KLI70416.1 |
| Variables:<br>VaAres1_A_FDSW210055060-2r | C              | 10444 | 10444 | 1 | A -> C                   | 730        | SNP (transversion) | 39.90%         | 0         | calcium-binding protein CDS | calcium-binding protein | None         | KLI70416.1 |
| Variables:<br>VaAres1_A_FDSW210055060-2r | ACC            | 10481 | 10483 | 2 | TCA -> ACC               | 673 -> 675 | Substitution       | 27.6% -> 27.9% | 0         | calcium-binding protein CDS | calcium-binding protein | Substitution | KLI70416.1 |
| Variables:<br>VaAres1_A_FDSW210055060-2r | A              | 10534 | 10534 | 1 | G -> A                   | 603        | SNP (transition)   | 90.50%         | 0         | calcium-binding protein CDS | calcium-binding protein | None         | KLI70416.1 |
| Variables:<br>VaAres1_A_FDSW210055060-2r | C              | 10540 | 10540 | 1 | T -> C                   | 601        | SNP (transition)   | 93.70%         | 0         | calcium-binding protein CDS | calcium-binding protein | None         | KLI70416.1 |
| Variables:<br>VaAres1_A_FDSW210055060-2r | G              | 10543 | 10543 | 1 | C -> G                   | 596        | SNP (transversion) | 29.90%         | 0         | calcium-binding protein CDS | calcium-binding protein | None         | KLI70416.1 |
| Variables:<br>VaAres1_A_FDSW210055060-2r | T              | 10546 | 10546 | 1 | C -> T                   | 598        | SNP (transition)   | 94.10%         | 0         | calcium-binding protein CDS | calcium-binding protein | None         | KLI70416.1 |
| Variables:<br>VaAres1_A_FDSW210055060-2r | AGCGGA<br>AACG | 10549 | 10558 | 9 | GTCCACTGTT -> AGCGGAAACG | 588 -> 599 | Substitution       | 94.0% -> 94.8% | 0         | calcium-binding protein CDS | calcium-binding protein | Substitution | KLI70416.1 |
| Variables:<br>VaAres1_A_FDSW210055060-2r | A              | 10564 | 10564 | 1 | C -> A                   | 589        | SNP (transversion) | 73.70%         | 0         | calcium-binding protein CDS | calcium-binding protein | None         | KLI70416.1 |

[illegible]

|                                             |                |       |       |   |                             |               |      |                                           |  |                   |  |           |                                |                                |                  |                |                 |
|---------------------------------------------|----------------|-------|-------|---|-----------------------------|---------------|------|-------------------------------------------|--|-------------------|--|-----------|--------------------------------|--------------------------------|------------------|----------------|-----------------|
| Variants:<br>VaAres1_B_FDSW210055061-<br>2r | G              | 10405 | 10405 | 1 | C -> G                      |               | 989  | SNP<br>(transversio<br>n)                 |  | 51.40%            |  | 0         | calcium-binding<br>protein CDS | calcium-<br>binding<br>protein | None             | KLI70416.1     |                 |
| Variants:<br>VaAres1_B_FDSW210055061-<br>2r | T              | 10429 | 10429 | 1 | C -> T                      |               | 1007 | SNP<br>(transition)                       |  | 31.30%            |  | 0         | calcium-binding<br>protein CDS | calcium-<br>binding<br>protein | None             | KLI70416.1     |                 |
| Variants:<br>VaAres1_B_FDSW210055061-<br>2r | G              | 10441 | 10441 | 1 | A -> G                      |               | 975  | SNP<br>(transition)                       |  | 47.10%            |  | 0         | calcium-binding<br>protein CDS | calcium-<br>binding<br>protein | None             | KLI70416.1     |                 |
| Variants:<br>VaAres1_B_FDSW210055061-<br>2r | C              | 10444 | 10444 | 1 | A -> C                      |               | 956  | SNP<br>(transversio<br>n)                 |  | 43.10%            |  | 0         | calcium-binding<br>protein CDS | calcium-<br>binding<br>protein | None             | KLI70416.1     |                 |
| Variants:<br>VaAres1_B_FDSW210055061-<br>2r | ACC            | 10481 | 10483 | 2 | TCA -> ACC                  | 916 -><br>919 |      | Substitution                              |  | 29.3% -><br>29.4% |  | 0         | calcium-binding<br>protein CDS | calcium-<br>binding<br>protein | Substitu<br>tion | KLI70<br>416.1 | S -> T          |
| Variants:<br>VaAres1_B_FDSW210055061-<br>2r | C              | 10498 | 10498 | 1 | T -> C                      |               | 884  | SNP<br>(transition)                       |  | 29.10%            |  | 0         | calcium-binding<br>protein CDS | calcium-<br>binding<br>protein | None             | KLI70416.1     |                 |
| Variants:<br>VaAres1_B_FDSW210055061-<br>2r | A              | 10534 | 10534 | 1 | G -> A                      |               | 823  | SNP<br>(transition)                       |  | 89.80%            |  | 0         | calcium-binding<br>protein CDS | calcium-<br>binding<br>protein | None             | KLI70416.1     |                 |
| Variants:<br>VaAres1_B_FDSW210055061-<br>2r | C              | 10540 | 10540 | 1 | T -> C                      |               | 827  | SNP<br>(transition)                       |  | 94.90%            |  | 0         | calcium-binding<br>protein CDS | calcium-<br>binding<br>protein | None             | KLI70416.1     |                 |
| Variants:<br>VaAres1_B_FDSW210055061-<br>2r | G              | 10543 | 10543 | 1 | C -> G                      |               | 817  | SNP<br>(transversio<br>n)                 |  | 35.10%            |  | 0         | calcium-binding<br>protein CDS | calcium-<br>binding<br>protein | None             | KLI70416.1     |                 |
| Variants:<br>VaAres1_B_FDSW210055061-<br>2r | T              | 10546 | 10546 | 1 | C -> T                      |               | 799  | SNP<br>(transition)                       |  | 94.90%            |  | 0         | calcium-binding<br>protein CDS | calcium-<br>binding<br>protein | None             | KLI70416.1     |                 |
| Variants:<br>VaAres1_B_FDSW210055061-<br>2r | AGCGGA<br>AACG | 10549 | 10558 | 9 | GTCCACTGTT -><br>AGCGGAAACG | 740 -><br>756 |      | Substitution<br>SNP<br>(transversio<br>n) |  | 90.7% -><br>93.5% |  | 0         | calcium-binding<br>protein CDS | calcium-<br>binding<br>protein | Substitu<br>tion | KLI70<br>416.1 | ESTV -><br>EAET |
| Variants:<br>VaAres1_B_FDSW210055061-<br>2r | A              | 10564 | 10564 | 1 | C -> A                      |               | 744  |                                           |  | 72.60%            |  | 0         | calcium-binding<br>protein CDS | calcium-<br>binding<br>protein | None             | KLI70416.1     |                 |
| Variants:<br>VaAres1_B_FDSW210055061-<br>2r | TTG            | 10568 | 10570 | 2 | CTA -> TTG                  | 741 -><br>742 |      | Substitution                              |  | 96.4% -><br>96.5% |  | 0         | calcium-binding<br>protein CDS | calcium-<br>binding<br>protein | None             | KLI70416.1     |                 |
| Variants:<br>VaAres1_B_FDSW210055061-<br>2r | T              | 10573 | 10573 | 1 | C -> T                      |               | 743  | SNP<br>(transition)                       |  | 97.30%            |  | 0         | calcium-binding<br>protein CDS | calcium-<br>binding<br>protein | None             | KLI70416.1     |                 |
| Variants:<br>VaAres1_B_FDSW210055061-<br>2r | T              | 10576 | 10576 | 1 | G -> T                      |               | 733  | SNP<br>(transversio<br>n)                 |  | 97.50%            |  | 0         | calcium-binding<br>protein CDS | calcium-<br>binding<br>protein | None             | KLI70416.1     |                 |
| Variants:<br>VaAres1_B_FDSW210055061-<br>2r | TCTC           | 10579 | 10582 | 3 | CTTG -> TCTC                | 734 -><br>740 |      | Substitution                              |  | 96.2% -><br>96.6% |  | 0         | calcium-binding<br>protein CDS | calcium-<br>binding<br>protein | None             | KLI70416.1     |                 |
| Variants:<br>VaAres1_B_FDSW210055061-<br>2r | T              | 10596 | 10596 | 1 | C -> T                      |               | 737  | SNP<br>(transition)                       |  | 97.80%            |  | 0         | calcium-binding<br>protein CDS | calcium-<br>binding<br>protein | Substitu<br>tion | KLI70<br>416.1 | A -> V          |
| Variants:<br>VaAres1_B_FDSW210055061-<br>2r | C              | 10609 | 10609 | 1 | T -> C                      |               | 710  | SNP<br>(transition)                       |  | 98.30%            |  | 0         | calcium-binding<br>protein CDS | calcium-<br>binding<br>protein | None             | KLI70416.1     |                 |
| Variants:<br>VaAres1_B_FDSW210055061-<br>2r | A              | 10615 | 10615 | 1 | G -> A                      |               | 676  | SNP<br>(transition)                       |  | 98.50%            |  | 0         | calcium-binding<br>protein CDS | calcium-<br>binding<br>protein | None             | KLI70416.1     |                 |
| Variants:<br>VaAres1_C_FDSW210055062-<br>1r | CATC           | 10108 | 10111 | 3 | GGTT -> CATC                | 235 -><br>245 |      | Substitution<br>SNP<br>(transversio<br>n) |  | 25.5% -><br>26.7% |  | 1.00E-48  | calcium-binding<br>protein CDS | calcium-<br>binding<br>protein | Substitu<br>tion | KLI70<br>416.1 | TV -> TI        |
| Variants:<br>VaAres1_C_FDSW210055062-<br>1r | C              | 10129 | 10129 | 1 | G -> C                      |               | 322  |                                           |  | 43.80%            |  | 6.40E-217 | calcium-binding<br>protein CDS | calcium-<br>binding<br>protein | None             | KLI70416.1     |                 |
| Variants:<br>VaAres1_C_FDSW210055062-<br>1r | T              | 10145 | 10145 | 1 | C -> T                      |               | 372  | SNP<br>(transition)                       |  | 37.10%            |  | 2.40E-268 | calcium-binding<br>protein CDS | calcium-<br>binding<br>protein | None             | KLI70416.1     |                 |

|                                          |    |       |       |   |          |              |                    |                |           |                             |                         |              |            |
|------------------------------------------|----|-------|-------|---|----------|--------------|--------------------|----------------|-----------|-----------------------------|-------------------------|--------------|------------|
| Variables:<br>VaAres1_C_FDSW210055062-1r | C  | 10153 | 10153 | 1 | T -> C   | 387          | SNP (transition)   | 38.80%         | 0         | calcium-binding protein CDS | calcium-binding protein | None         | KLI70416.1 |
| Variables:<br>VaAres1_C_FDSW210055062-1r | T  | 10159 | 10159 | 1 | C -> T   | 397          | SNP (transition)   | 40.30%         | 0         | calcium-binding protein CDS | calcium-binding protein | None         | KLI70416.1 |
| Variables:<br>VaAres1_C_FDSW210055062-1r | A  | 10204 | 10204 | 1 | C -> A   | 543          | SNP (transversion) | 38.50%         | 0         | calcium-binding protein CDS | calcium-binding protein | None         | KLI70416.1 |
| Variables:<br>VaAres1_C_FDSW210055062-1r | TG | 10255 | 10256 | 2 | GA -> TG | 737 -> 742   | Substitution       | 31.10%         | 1.40E-155 | calcium-binding protein CDS | calcium-binding protein | Substitution | KLI70416.1 |
| Variables:<br>VaAres1_C_FDSW210055062-1r | C  | 10273 | 10273 | 1 | T -> C   | 757          | SNP (transition)   | 40.30%         | 0         | calcium-binding protein CDS | calcium-binding protein | None         | KLI70416.1 |
| Variables:<br>VaAres1_C_FDSW210055062-1r | G  | 10282 | 10282 | 1 | C -> G   | 788          | SNP (transversion) | 41.80%         | 0         | calcium-binding protein CDS | calcium-binding protein | None         | KLI70416.1 |
| Variables:<br>VaAres1_C_FDSW210055062-1r | A  | 10288 | 10288 | 1 | G -> A   | 814          | SNP (transition)   | 35.50%         | 4.9E-324  | calcium-binding protein CDS | calcium-binding protein | None         | KLI70416.1 |
| Variables:<br>VaAres1_C_FDSW210055062-1r | T  | 10322 | 10322 | 1 | G -> T   | 1036         | SNP (transversion) | 47.60%         | 0         | calcium-binding protein CDS | calcium-binding protein | Substitution | KLI70416.1 |
| Variables:<br>VaAres1_C_FDSW210055062-1r | C  | 10333 | 10333 | 1 | T -> C   | 1108         | SNP (transition)   | 34.80%         | 0         | calcium-binding protein CDS | calcium-binding protein | None         | KLI70416.1 |
| Variables:<br>VaAres1_C_FDSW210055062-1r | T  | 10351 | 10351 | 1 | A -> T   | 1206         | SNP (transversion) | 32.30%         | 0         | calcium-binding protein CDS | calcium-binding protein | None         | KLI70416.1 |
| Variables:<br>VaAres1_C_FDSW210055062-1r | A  | 10369 | 10369 | 1 | G -> A   | 1233         | SNP (transition)   | 32.80%         | 0         | calcium-binding protein CDS | calcium-binding protein | None         | KLI70416.1 |
| Variables:<br>VaAres1_C_FDSW210055062-1r | A  | 10387 | 10387 | 1 | G -> A   | 1227         | SNP (transition)   | 46.40%         | 0         | calcium-binding protein CDS | calcium-binding protein | None         | KLI70416.1 |
| Variables:<br>VaAres1_C_FDSW210055062-1r | C  | 10396 | 10396 | 1 | T -> C   | 1256         | SNP (transition)   | 33.90%         | 0         | calcium-binding protein CDS | calcium-binding protein | None         | KLI70416.1 |
| Variables:<br>VaAres1_C_FDSW210055062-1r | G  | 10405 | 10405 | 1 | C -> G   | 1269         | SNP (transversion) | 50.00%         | 0         | calcium-binding protein CDS | calcium-binding protein | None         | KLI70416.1 |
| Variables:<br>VaAres1_C_FDSW210055062-1r | G  | 10414 | 10414 | 1 | A -> G   | 1275         | SNP (transition)   | 25.60%         | 0         | calcium-binding protein CDS | calcium-binding protein | None         | KLI70416.1 |
| Variables:<br>VaAres1_C_FDSW210055062-1r | T  | 10429 | 10429 | 1 | C -> T   | 1277         | SNP (transition)   | 28.80%         | 0         | calcium-binding protein CDS | calcium-binding protein | None         | KLI70416.1 |
| Variables:<br>VaAres1_C_FDSW210055062-1r | GT | 10434 | 10435 | 2 | CG -> GT | 1292 -> 1293 | Substitution       | 25.1% -> 25.6% | 0         | calcium-binding protein CDS | calcium-binding protein | Substitution | KLI70416.1 |
| Variables:<br>VaAres1_C_FDSW210055062-1r | G  | 10441 | 10441 | 1 | A -> G   | 1268         | SNP (transition)   | 45.00%         | 0         | calcium-binding protein CDS | calcium-binding protein | None         | KLI70416.1 |
| Variables:<br>VaAres1_C_FDSW210055062-1r | C  | 10444 | 10444 | 1 | A -> C   | 1287         | SNP (transversion) | 47.10%         | 0         | calcium-binding protein CDS | calcium-binding protein | None         | KLI70416.1 |
| Variables:<br>VaAres1_C_FDSW210055062-1r | G  | 10468 | 10468 | 1 | A -> G   | 1314         | SNP (transition)   | 27.20%         | 0         | calcium-binding protein CDS | calcium-binding protein | None         | KLI70416.1 |
| Variables:<br>VaAres1_C_FDSW210055062-1r | AT | 10470 | 10471 | 2 | GC -> AT | 1318 -> 1328 | Substitution       | 27.3% -> 27.4% | 0         | calcium-binding protein CDS | calcium-binding protein | Substitution | KLI70416.1 |
| Variables:<br>VaAres1_C_FDSW210055062-1r | A  | 10481 | 10481 | 1 | T -> A   | 1328         | SNP (transversion) | 48.10%         | 0         | calcium-binding protein CDS | calcium-binding protein | Substitution | KLI70416.1 |

|                                                 |                |       |       |   |                             |                 |      |                                       |                   |           |   |                                |                            |              |                |                 |
|-------------------------------------------------|----------------|-------|-------|---|-----------------------------|-----------------|------|---------------------------------------|-------------------|-----------|---|--------------------------------|----------------------------|--------------|----------------|-----------------|
| Variants:<br>VaAres1_C_FDSW210055062-1r         | C              | 10486 | 10486 | 1 | T -> C                      |                 | 1335 | SNP<br>(transition)                   | 34.30%            |           | 0 | calcium-binding<br>protein CDS | calcium-binding<br>protein | None         | KLI70416.1     |                 |
| Variants:<br>VaAres1_C_FDSW210055062-1r         | C              | 10498 | 10498 | 1 | T -> C                      |                 | 1317 | SNP<br>(transition)                   | 42.90%            |           | 0 | calcium-binding<br>protein CDS | calcium-binding<br>protein | None         | KLI70416.1     |                 |
| Variants:<br>VaAres1_C_FDSW210055062-1r         | A              | 10534 | 10534 | 1 | G -> A                      |                 | 1358 | SNP<br>(transition)                   | 93.30%            |           | 0 | calcium-binding<br>protein CDS | calcium-binding<br>protein | None         | KLI70416.1     |                 |
| Variants:<br>VaAres1_C_FDSW210055062-1r         | C              | 10540 | 10540 | 1 | T -> C                      |                 | 1355 | SNP<br>(transition)                   | 96.20%            |           | 0 | calcium-binding<br>protein CDS | calcium-binding<br>protein | None         | KLI70416.1     |                 |
| Variants:<br>VaAres1_C_FDSW210055062-1r         | G              | 10543 | 10543 | 1 | C -> G                      |                 | 1343 | SNP<br>(transversion)                 | 52.50%            |           | 0 | calcium-binding<br>protein CDS | calcium-binding<br>protein | None         | KLI70416.1     |                 |
| Variants:<br>VaAres1_C_FDSW210055062-1r         | T              | 10546 | 10546 | 1 | C -> T                      |                 | 1330 | SNP<br>(transition)                   | 96.90%            |           | 0 | calcium-binding<br>protein CDS | calcium-binding<br>protein | None         | KLI70416.1     |                 |
| Variants:<br>VaAres1_C_FDSW210055062-1r         | AGCGGA<br>AACG | 10549 | 10558 | 9 | GTCCACTGTT -><br>AGCGGAAACG | 1315 -><br>1328 |      | Substitution<br>SNP<br>(transversion) | 93.2% -><br>94.7% |           | 0 | calcium-binding<br>protein CDS | calcium-binding<br>protein | Substitution | KLI70<br>416.1 | ESTV -><br>EAET |
| Variants:<br>VaAres1_C_FDSW210055062-1r         | A              | 10564 | 10564 | 1 | C -> A                      |                 | 1313 | SNP<br>(transversion)                 | 57.70%            |           | 0 | calcium-binding<br>protein CDS | calcium-binding<br>protein | None         | KLI70416.1     |                 |
| Variants:<br>VaAres1_C_FDSW210055062-1r         | G              | 10564 | 10564 | 1 | C -> G                      |                 | 1313 | SNP<br>(transversion)                 | 40.50%            |           | 0 | calcium-binding<br>protein CDS | calcium-binding<br>protein | None         | KLI70416.1     |                 |
| Variants:<br>VaAres1_C_FDSW210055062-1r         | A              | 10567 | 10567 | 1 | G -> A                      |                 | 1317 | SNP<br>(transition)                   | 38.70%            |           | 0 | calcium-binding<br>protein CDS | calcium-binding<br>protein | None         | KLI70416.1     |                 |
| Variants:<br>VaAres1_C_FDSW210055062-1r         | TTG            | 10568 | 10570 | 2 | CTA -> TTG                  | 1305 -><br>1310 |      | Substitution                          | 97.7% -><br>98.0% |           | 0 | calcium-binding<br>protein CDS | calcium-binding<br>protein | None         | KLI70416.1     |                 |
| Variants:<br>VaAres1_C_FDSW210055062-1r         | T              | 10573 | 10573 | 1 | C -> T                      |                 | 1287 | SNP<br>(transition)                   | 98.40%            |           | 0 | calcium-binding<br>protein CDS | calcium-binding<br>protein | None         | KLI70416.1     |                 |
| Variants:<br>VaAres1_C_FDSW210055062-1r         | T              | 10576 | 10576 | 1 | G -> T                      |                 | 1286 | SNP<br>(transversion)                 | 98.80%            |           | 0 | calcium-binding<br>protein CDS | calcium-binding<br>protein | None         | KLI70416.1     |                 |
| Variants:<br>VaAres1_C_FDSW210055062-1r         | TCTC           | 10579 | 10582 | 3 | CTTG -> TCTC                | 1274 -><br>1287 |      | Substitution                          | 70.6% -><br>71.7% |           | 0 | calcium-binding<br>protein CDS | calcium-binding<br>protein | None         | KLI70416.1     |                 |
| Variants:<br>VaAres1_C_FDSW210055062-1r         | TCTT           | 10579 | 10582 | 3 | CTTG -> TCTT                | 1274 -><br>1287 |      | Substitution                          | 25.5% -><br>25.7% |           | 0 | calcium-binding<br>protein CDS | calcium-binding<br>protein | None         | KLI70416.1     |                 |
| Variants:<br>VaAres1_C_FDSW210055062-1r         | T              | 10596 | 10596 | 1 | C -> T                      |                 | 1134 | SNP<br>(transition)                   | 74.30%            |           | 0 | calcium-binding<br>protein CDS | calcium-binding<br>protein | Substitution | KLI70<br>416.1 | A -> V          |
| Variants:<br>VaAres1_C_FDSW210055062-1r         | A              | 10600 | 10600 | 1 | T -> A                      |                 | 1099 | SNP<br>(transversion)                 | 25.80%            |           | 0 | calcium-binding<br>protein CDS | calcium-binding<br>protein | None         | KLI70416.1     |                 |
| Variants:<br>VaAres1_C_FDSW210055062-1r         | C              | 10609 | 10609 | 1 | T -> C                      |                 | 1006 | SNP<br>(transition)                   | 99.60%            |           | 0 | calcium-binding<br>protein CDS | calcium-binding<br>protein | None         | KLI70416.1     |                 |
| Variants:<br>VaAres1_C_FDSW210055062-1r         | A              | 10615 | 10615 | 1 | G -> A                      |                 | 912  | SNP<br>(transition)                   | 99.20%            |           | 0 | calcium-binding<br>protein CDS | calcium-binding<br>protein | None         | KLI70416.1     |                 |
| Variants:<br>VaAres1_C_FDSW210055062-1r         | AAG            | 10630 | 10632 | 3 | CTC -> AAG                  | 740 -><br>765   |      | Substitution                          | 29.6% -><br>30.5% |           | 0 | calcium-binding<br>protein CDS | calcium-binding<br>protein | None         | KLI70416.1     |                 |
| Variants:<br>VaphiVaphiSt2_B_A_FDSW210055054-2r | CATC           | 10108 | 10111 | 3 | GGTT -> CATC                | 113 -><br>121   |      | Substitution<br>SNP<br>(transversion) | 25.7% -><br>30.6% | 3.40E-32  |   | calcium-binding<br>protein CDS | calcium-binding<br>protein | Substitution | KLI70<br>416.1 | TV -> TI        |
| Variants:<br>VaphiVaphiSt2_B_A_FDSW210055054-2r | C              | 10129 | 10129 | 1 | G -> C                      |                 | 154  | SNP<br>(transition)                   | 46.80%            | 1.20E-128 |   | calcium-binding<br>protein CDS | calcium-binding<br>protein | None         | KLI70416.1     |                 |

|                                                      |     |       |       |   |            |               |                       |                   |           |                                |                            |              |            |        |
|------------------------------------------------------|-----|-------|-------|---|------------|---------------|-----------------------|-------------------|-----------|--------------------------------|----------------------------|--------------|------------|--------|
| Variables:<br>VaphiVaphiSt2_B_A_FDSW210<br>055054-2r | T   | 10145 | 10145 | 1 | C -> T     | 196           | SNP<br>(transition)   | 40.30%            | 1.30E-181 | calcium-binding<br>protein CDS | calcium-binding<br>protein | None         | KLI70416.1 |        |
| Variables:<br>VaphiVaphiSt2_B_A_FDSW210<br>055054-2r | C   | 10153 | 10153 | 1 | T -> C     | 216           | SNP<br>(transition)   | 44.00%            | 1.10E-241 | calcium-binding<br>protein CDS | calcium-binding<br>protein | None         | KLI70416.1 |        |
| Variables:<br>VaphiVaphiSt2_B_A_FDSW210<br>055054-2r | T   | 10159 | 10159 | 1 | C -> T     | 236           | SNP<br>(transition)   | 49.60%            | 4.3E-317  | calcium-binding<br>protein CDS | calcium-binding<br>protein | None         | KLI70416.1 |        |
| Variables:<br>VaphiVaphiSt2_B_A_FDSW210<br>055054-2r | A   | 10204 | 10204 | 1 | C -> A     | 309           | SNP<br>(transversion) | 44.30%            | 0         | calcium-binding<br>protein CDS | calcium-binding<br>protein | None         | KLI70416.1 |        |
| Variables:<br>VaphiVaphiSt2_B_A_FDSW210<br>055054-2r | C   | 10273 | 10273 | 1 | T -> C     | 381           | SNP<br>(transition)   | 34.10%            | 5.00E-273 | calcium-binding<br>protein CDS | calcium-binding<br>protein | None         | KLI70416.1 |        |
| Variables:<br>VaphiVaphiSt2_B_A_FDSW210<br>055054-2r | G   | 10282 | 10282 | 1 | C -> G     | 396           | SNP<br>(transversion) | 31.60%            | 1.70E-257 | calcium-binding<br>protein CDS | calcium-binding<br>protein | None         | KLI70416.1 |        |
| Variables:<br>VaphiVaphiSt2_B_A_FDSW210<br>055054-2r | A   | 10288 | 10288 | 1 | G -> A     | 411           | SNP<br>(transition)   | 25.10%            | 6.60E-109 | calcium-binding<br>protein CDS | calcium-binding<br>protein | None         | KLI70416.1 |        |
| Variables:<br>VaphiVaphiSt2_B_A_FDSW210<br>055054-2r | T   | 10315 | 10315 | 1 | C -> T     | 492           | SNP<br>(transition)   | 25.60%            | 3.90E-171 | calcium-binding<br>protein CDS | calcium-binding<br>protein | None         | KLI70416.1 |        |
| Variables:<br>VaphiVaphiSt2_B_A_FDSW210<br>055054-2r | T   | 10322 | 10322 | 1 | G -> T     | 520           | SNP<br>(transversion) | 43.50%            | 3.5E-323  | calcium-binding<br>protein CDS | calcium-binding<br>protein | Substitution | KLI70416.1 | A -> S |
| Variables:<br>VaphiVaphiSt2_B_A_FDSW210<br>055054-2r | C   | 10333 | 10333 | 1 | T -> C     | 537           | SNP<br>(transition)   | 26.60%            | 9.90E-197 | calcium-binding<br>protein CDS | calcium-binding<br>protein | None         | KLI70416.1 |        |
| Variables:<br>VaphiVaphiSt2_B_A_FDSW210<br>055054-2r | T   | 10351 | 10351 | 1 | A -> T     | 591           | SNP<br>(transversion) | 33.70%            | 0         | calcium-binding<br>protein CDS | calcium-binding<br>protein | None         | KLI70416.1 |        |
| Variables:<br>VaphiVaphiSt2_B_A_FDSW210<br>055054-2r | A   | 10369 | 10369 | 1 | G -> A     | 625           | SNP<br>(transition)   | 35.20%            | 0         | calcium-binding<br>protein CDS | calcium-binding<br>protein | None         | KLI70416.1 |        |
| Variables:<br>VaphiVaphiSt2_B_A_FDSW210<br>055054-2r | A   | 10387 | 10387 | 1 | G -> A     | 675           | SNP<br>(transition)   | 43.30%            | 0         | calcium-binding<br>protein CDS | calcium-binding<br>protein | None         | KLI70416.1 |        |
| Variables:<br>VaphiVaphiSt2_B_A_FDSW210<br>055054-2r | C   | 10396 | 10396 | 1 | T -> C     | 692           | SNP<br>(transition)   | 37.00%            | 0         | calcium-binding<br>protein CDS | calcium-binding<br>protein | None         | KLI70416.1 |        |
| Variables:<br>VaphiVaphiSt2_B_A_FDSW210<br>055054-2r | G   | 10405 | 10405 | 1 | C -> G     | 709           | SNP<br>(transversion) | 54.20%            | 0         | calcium-binding<br>protein CDS | calcium-binding<br>protein | None         | KLI70416.1 |        |
| Variables:<br>VaphiVaphiSt2_B_A_FDSW210<br>055054-2r | G   | 10414 | 10414 | 1 | A -> G     | 707           | SNP<br>(transition)   | 26.60%            | 0         | calcium-binding<br>protein CDS | calcium-binding<br>protein | None         | KLI70416.1 |        |
| Variables:<br>VaphiVaphiSt2_B_A_FDSW210<br>055054-2r | T   | 10429 | 10429 | 1 | C -> T     | 697           | SNP<br>(transition)   | 33.40%            | 0         | calcium-binding<br>protein CDS | calcium-binding<br>protein | None         | KLI70416.1 |        |
| Variables:<br>VaphiVaphiSt2_B_A_FDSW210<br>055054-2r | G   | 10441 | 10441 | 1 | A -> G     | 656           | SNP<br>(transition)   | 50.60%            | 0         | calcium-binding<br>protein CDS | calcium-binding<br>protein | None         | KLI70416.1 |        |
| Variables:<br>VaphiVaphiSt2_B_A_FDSW210<br>055054-2r | C   | 10444 | 10444 | 1 | A -> C     | 656           | SNP<br>(transversion) | 43.80%            | 0         | calcium-binding<br>protein CDS | calcium-binding<br>protein | None         | KLI70416.1 |        |
| Variables:<br>VaphiVaphiSt2_B_A_FDSW210<br>055054-2r | ACC | 10481 | 10483 | 2 | TCA -> ACC | 570 -><br>571 | Substitution          | 32.4% -><br>32.8% | 0         | calcium-binding<br>protein CDS | calcium-binding<br>protein | Substitution | KLI70416.1 | S -> T |
| Variables:<br>VaphiVaphiSt2_B_A_FDSW210<br>055054-2r | A   | 10534 | 10534 | 1 | G -> A     | 510           | SNP<br>(transition)   | 89.40%            | 0         | calcium-binding<br>protein CDS | calcium-binding<br>protein | None         | KLI70416.1 |        |
| Variables:<br>VaphiVaphiSt2_B_A_FDSW210<br>055054-2r | C   | 10540 | 10540 | 1 | T -> C     | 488           | SNP<br>(transition)   | 94.30%            | 0         | calcium-binding<br>protein CDS | calcium-binding<br>protein | None         | KLI70416.1 |        |



|                                                  |                |       |       |   |                            |            |                                 |                |           |                             |                         |              |                         |
|--------------------------------------------------|----------------|-------|-------|---|----------------------------|------------|---------------------------------|----------------|-----------|-----------------------------|-------------------------|--------------|-------------------------|
| Variables:<br>VaphiVaphiSt2_B_A_FDSW210055054-2r | G              | 10543 | 10543 | 1 | C -> G                     | 473        | SNP (transversion)              | 31.10%         | 0         | calcium-binding protein CDS | calcium-binding protein | None         | KLI70416.1              |
| Variables:<br>VaphiVaphiSt2_B_A_FDSW210055054-2r | T              | 10546 | 10546 | 1 | C -> T                     | 466        | SNP (transition)                | 95.10%         | 0         | calcium-binding protein CDS | calcium-binding protein | None         | KLI70416.1              |
| Variables:<br>VaphiVaphiSt2_B_A_FDSW210055054-2r | AGCGGA<br>AACG | 10549 | 10558 | 9 | GTCCACTGTGTT -> AGCGGAAACG | 421 -> 460 | Substitution SNP (transversion) | 92.2% -> 93.6% | 0         | calcium-binding protein CDS | calcium-binding protein | Substitution | KLI70416.1 ESTV -> EAET |
| Variables:<br>VaphiVaphiSt2_B_A_FDSW210055054-2r | A              | 10564 | 10564 | 1 | C -> A                     | 403        |                                 | 73.90%         | 0         | calcium-binding protein CDS | calcium-binding protein | None         | KLI70416.1              |
| Variables:<br>VaphiVaphiSt2_B_A_FDSW210055054-2r | TTG            | 10568 | 10570 | 2 | CTA -> TTG                 | 389 -> 394 | Substitution                    | 95.7% -> 96.1% | 0         | calcium-binding protein CDS | calcium-binding protein | None         | KLI70416.1              |
| Variables:<br>VaphiVaphiSt2_B_A_FDSW210055054-2r | T              | 10573 | 10573 | 1 | C -> T                     | 382        | SNP (transition)                | 97.60%         | 0         | calcium-binding protein CDS | calcium-binding protein | None         | KLI70416.1              |
| Variables:<br>VaphiVaphiSt2_B_A_FDSW210055054-2r | T              | 10576 | 10576 | 1 | G -> T                     | 376        | SNP (transversion)              | 97.90%         | 0         | calcium-binding protein CDS | calcium-binding protein | None         | KLI70416.1              |
| Variables:<br>VaphiVaphiSt2_B_A_FDSW210055054-2r | TCTC           | 10579 | 10582 | 3 | CTTG -> TCTC               | 358 -> 371 | Substitution                    | 96.5% -> 97.2% | 0         | calcium-binding protein CDS | calcium-binding protein | None         | KLI70416.1              |
| Variables:<br>VaphiVaphiSt2_B_A_FDSW210055054-2r | T              | 10596 | 10596 | 1 | C -> T                     | 325        | SNP (transition)                | 97.80%         | 0         | calcium-binding protein CDS | calcium-binding protein | Substitution | KLI70416.1 A -> V       |
| Variables:<br>VaphiVaphiSt2_B_A_FDSW210055054-2r | C              | 10609 | 10609 | 1 | T -> C                     | 290        | SNP (transition)                | 99.00%         | 0         | calcium-binding protein CDS | calcium-binding protein | None         | KLI70416.1              |
| Variables:<br>VaphiVaphiSt2_B_A_FDSW210055054-2r | A              | 10615 | 10615 | 1 | G -> A                     | 267        | SNP (transition)                | 99.30%         | 0         | calcium-binding protein CDS | calcium-binding protein | None         | KLI70416.1              |
| Variables:<br>VaphiSt2_B_FDSW210055056-1r        | C              | 10129 | 10129 | 1 | G -> C                     | 299        | SNP (transversion)              | 33.80%         | 5.70E-112 | calcium-binding protein CDS | calcium-binding protein | None         | KLI70416.1              |
| Variables:<br>VaphiSt2_B_FDSW210055056-1r        | T              | 10145 | 10145 | 1 | C -> T                     | 343        | SNP (transition)                | 30.60%         | 4.00E-173 | calcium-binding protein CDS | calcium-binding protein | None         | KLI70416.1              |
| Variables:<br>VaphiSt2_B_FDSW210055056-1r        | C              | 10153 | 10153 | 1 | T -> C                     | 375        | SNP (transition)                | 29.10%         | 2.70E-209 | calcium-binding protein CDS | calcium-binding protein | None         | KLI70416.1              |
| Variables:<br>VaphiSt2_B_FDSW210055056-1r        | T              | 10159 | 10159 | 1 | C -> T                     | 396        | SNP (transition)                | 33.10%         | 5.60E-273 | calcium-binding protein CDS | calcium-binding protein | None         | KLI70416.1              |
| Variables:<br>VaphiSt2_B_FDSW210055056-1r        | A              | 10204 | 10204 | 1 | C -> A                     | 516        | SNP (transversion)              | 36.40%         | 0         | calcium-binding protein CDS | calcium-binding protein | None         | KLI70416.1              |
| Variables:<br>VaphiSt2_B_FDSW210055056-1r        | TG             | 10255 | 10256 | 2 | GA -> TG                   | 738 -> 739 | Substitution                    | 37.3% -> 37.5% | 4.50E-265 | calcium-binding protein CDS | calcium-binding protein | Substitution | KLI70416.1 VT -> VA     |
| Variables:<br>VaphiSt2_B_FDSW210055056-1r        | C              | 10273 | 10273 | 1 | T -> C                     | 730        | SNP (transition)                | 40.30%         | 0         | calcium-binding protein CDS | calcium-binding protein | None         | KLI70416.1              |
| Variables:<br>VaphiSt2_B_FDSW210055056-1r        | G              | 10282 | 10282 | 1 | C -> G                     | 756        | SNP (transversion)              | 39.60%         | 0         | calcium-binding protein CDS | calcium-binding protein | None         | KLI70416.1              |
| Variables:<br>VaphiSt2_B_FDSW210055056-1r        | A              | 10288 | 10288 | 1 | G -> A                     | 769        | SNP (transition)                | 38.80%         | 0         | calcium-binding protein CDS | calcium-binding protein | None         | KLI70416.1              |
| Variables:<br>VaphiSt2_B_FDSW210055056-1r        | T              | 10315 | 10315 | 1 | C -> T                     | 940        | SNP (transition)                | 26.80%         | 0         | calcium-binding protein CDS | calcium-binding protein | None         | KLI70416.1              |
| Variables:<br>VaphiSt2_B_FDSW210055056-1r        | T              | 10322 | 10322 | 1 | G -> T                     | 997        | SNP (transversion)              | 51.10%         | 0         | calcium-binding protein CDS | calcium-binding protein | Substitution | KLI70416.1 A -> S       |

|                    |                |   |                             |                             |              |                         |
|--------------------|----------------|---|-----------------------------|-----------------------------|--------------|-------------------------|
| SNP (transition)   | 35.40%         | 0 | calcium-binding protein CDS | calcium-binding protein CDS | None         | KLI70416.1              |
| SNP (transversion) | 30.90%         | 0 | calcium-binding protein CDS | calcium-binding protein CDS | None         | KLI70416.1              |
| SNP (transition)   | 35.60%         | 0 | calcium-binding protein CDS | calcium-binding protein CDS | None         | KLI70416.1              |
| SNP (transition)   | 42.10%         | 0 | calcium-binding protein CDS | calcium-binding protein CDS | None         | KLI70416.1              |
| SNP (transition)   | 32.30%         | 0 | calcium-binding protein CDS | calcium-binding protein CDS | None         | KLI70416.1              |
| SNP (transversion) | 50.30%         | 0 | calcium-binding protein CDS | calcium-binding protein CDS | None         | KLI70416.1              |
| SNP (transition)   | 26.70%         | 0 | calcium-binding protein CDS | calcium-binding protein CDS | None         | KLI70416.1              |
| SNP (transition)   | 29.20%         | 0 | calcium-binding protein CDS | calcium-binding protein CDS | None         | KLI70416.1              |
| SNP (transversion) | 25.20%         | 0 | calcium-binding protein CDS | calcium-binding protein CDS | None         | KLI70416.1              |
| SNP (transition)   | 46.90%         | 0 | calcium-binding protein CDS | calcium-binding protein CDS | None         | KLI70416.1              |
| SNP (transversion) | 44.50%         | 0 | calcium-binding protein CDS | calcium-binding protein CDS | None         | KLI70416.1              |
| 1126 -> 1140       | 30.4% -> 30.8% | 0 | calcium-binding protein CDS | calcium-binding protein CDS | Substitution | KLI70416.1 S -> T       |
| SNP (transition)   | 90.00%         | 0 | calcium-binding protein CDS | calcium-binding protein CDS | None         | KLI70416.1              |
| SNP (transition)   | 93.30%         | 0 | calcium-binding protein CDS | calcium-binding protein CDS | None         | KLI70416.1              |
| SNP (transversion) | 31.80%         | 0 | calcium-binding protein CDS | calcium-binding protein CDS | None         | KLI70416.1              |
| SNP (transition)   | 94.60%         | 0 | calcium-binding protein CDS | calcium-binding protein CDS | None         | KLI70416.1              |
| 1000 -> 1017       | 90.6% -> 92.9% | 0 | calcium-binding protein CDS | calcium-binding protein CDS | Substitution | KLI70416.1 ESTV -> EAET |
| SNP (transversion) | 74.70%         | 0 | calcium-binding protein CDS | calcium-binding protein CDS | None         | KLI70416.1              |
| 996 -> 1003        | 96.5% -> 96.6% | 0 | calcium-binding protein CDS | calcium-binding protein CDS | None         | KLI70416.1              |
| SNP (transition)   | 96.40%         | 0 | calcium-binding protein CDS | calcium-binding protein CDS | None         | KLI70416.1              |
| SNP (transversion) | 96.50%         | 0 | calcium-binding protein CDS | calcium-binding protein CDS | None         | KLI70416.1              |
| 938 -> 956         | 95.4% -> 95.5% | 0 | calcium-binding protein CDS | calcium-binding protein CDS | None         | KLI70416.1              |

|                                                                                                                                  |   |       |       |   |        |     |                  |        |   |                             |                                                                         |              |            |        |
|----------------------------------------------------------------------------------------------------------------------------------|---|-------|-------|---|--------|-----|------------------|--------|---|-----------------------------|-------------------------------------------------------------------------|--------------|------------|--------|
| Variants:<br>VaphiSt2_B_FDSW210055056-1r<br>Variants:<br>VaphiSt2_B_FDSW210055056-1r<br>Variants:<br>VaphiSt2_B_FDSW210055056-1r | T | 10596 | 10596 | 1 | C -> T | 867 | SNP (transition) | 97.80% | 0 | calcium-binding protein CDS | calcium-binding protein calcium-binding protein calcium-binding protein | Substitution | KL170416.1 | A -> V |
|                                                                                                                                  | C | 10609 | 10609 | 1 | T -> C | 782 | SNP (transition) | 98.50% | 0 | calcium-binding protein CDS |                                                                         | None         | KL170416.1 |        |
|                                                                                                                                  | A | 10615 | 10615 | 1 | G -> A | 734 | SNP (transition) | 98.80% | 0 | calcium-binding protein CDS |                                                                         | None         | KL170416.1 |        |

## Contig 29

| Variant                                      | Name | Minimum | Maximum | Length | Change | Coverage | Polymorphism Type  | Variant Frequency | Variant P-Value (approximate) |
|----------------------------------------------|------|---------|---------|--------|--------|----------|--------------------|-------------------|-------------------------------|
| Variants: VaphiVaphiSt2_B_A_FDSW210055054-2r | G    | 21      | 21      | 1      | A -> G | 207      | SNP (transition)   | 32.40%            | 2.30E-126                     |
| Variants: VaphiVaphiSt2_B_A_FDSW210055054-2r | T    | 23      | 23      | 1      | A -> T | 205      | SNP (transversion) | 27.30%            | 4.70E-101                     |

## Contig 34

| Variant                                     | Name | Minimum | Maximum | Length | Change   | Coverage   | Polymorphism Type               | Variant Frequency | Variant P-Value (approximate) | Amino Acid Change | CDS                     | product             | Protein Effect | protein_id |
|---------------------------------------------|------|---------|---------|--------|----------|------------|---------------------------------|-------------------|-------------------------------|-------------------|-------------------------|---------------------|----------------|------------|
| Variant: VaAphrodite_A_FDSW210055057-2r     | C    | 3880    | 3880    | 1      | T -> C   | 120        | SNP (transition)                | 27.50%            | 1.60E-50                      |                   | nucleoside permease CDS | nucleoside permease | None           | KLI70272.1 |
| Variant: VaAphrodite_A_FDSW210055057-2r     | G    | 3957    | 3957    | 1      | A -> G   | 175        | SNP (transition)                | 45.10%            | 1.90E-202                     |                   | nucleoside permease CDS | nucleoside permease | None           | KLI70272.1 |
| Variant: VaAphrodite_A_FDSW210055057-2r     | AT   | 3996    | 3997    | 2      | AT       | 184 -> 185 | Substitution SNP (transversion) | 45.9% -> 46.2%    | 8.20E-236                     | RH -> RY          | nucleoside permease CDS | nucleoside permease | Substitution   | KLI70272.1 |
| Variant: VaAphrodite_A_FDSW210055057-2r     | G    | 4024    | 4024    | 1      | T -> G   | 178        | SNP (transversion)              | 45.50%            | 4.30E-224                     | E -> D            | nucleoside permease CDS | nucleoside permease | Substitution   | KLI70272.1 |
| Variant: VaAphrodite_B_FDSW210055058-2r     | GC   | 2       | 3       | 2      | TG -> GC | 64 -> 65   | Substitution SNP (transition)   | 25.0% -> 27.7%    | 3.10E-45                      |                   | nucleoside permease CDS | nucleoside permease | None           | KLI70272.1 |
| Variant: VaAphrodite_B_FDSW210055058-2r     | G    | 3957    | 3957    | 1      | A -> G   | 188        | SNP (transition)                | 29.80%            | 1.30E-142                     |                   | nucleoside permease CDS | nucleoside permease | None           | KLI70272.1 |
| Variant: VaAphrodite_B_FDSW210055058-2r     | AT   | 3996    | 3997    | 2      | AT       | 207 -> 208 | Substitution SNP (transversion) | 31.9% -> 32.2%    | 2.60E-166                     | RH -> RY          | nucleoside permease CDS | nucleoside permease | Substitution   | KLI70272.1 |
| Variant: VaAphrodite_B_FDSW210055058-2r     | G    | 4024    | 4024    | 1      | T -> G   | 205        | SNP (transversion)              | 33.20%            | 5.00E-163                     | E -> D            | nucleoside permease CDS | nucleoside permease | Substitution   | KLI70272.1 |
| Variant: VaAphrodite_C_FDSW210055059-1r     | GC   | 2       | 3       | 2      | TG -> GC | 107 -> 108 | Substitution SNP (transition)   | 27.1% -> 27.8%    | 3.80E-76                      |                   | nucleoside permease CDS | nucleoside permease | None           | KLI70272.1 |
| Variant: VaAphrodite_C_FDSW210055059-1r     | G    | 3957    | 3957    | 1      | A -> G   | 284        | SNP (transition)                | 35.90%            | 2.50E-268                     |                   | nucleoside permease CDS | nucleoside permease | None           | KLI70272.1 |
| Variant: VaAphrodite_C_FDSW210055059-1r     | AT   | 3996    | 3997    | 2      | AT       | 280 -> 283 | Substitution SNP (transversion) | 35.3% -> 35.7%    | 3.10E-262                     | RH -> RY          | nucleoside permease CDS | nucleoside permease | Substitution   | KLI70272.1 |
| Variant: VaAphrodite_C_FDSW210055059-1r     | G    | 4024    | 4024    | 1      | T -> G   | 287        | SNP (transversion)              | 38.00%            | 5.10E-279                     | E -> D            | nucleoside permease CDS | nucleoside permease | Substitution   | KLI70272.1 |
| Variant: VaAres1_A_FDSW210055060-2r         | G    | 3957    | 3957    | 1      | A -> G   | 128        | SNP (transition)                | 48.40%            | 8.60E-162                     |                   | nucleoside permease CDS | nucleoside permease | None           | KLI70272.1 |
| Variant: VaAres1_A_FDSW210055060-2r         | AT   | 3996    | 3997    | 2      | AT       | 131 -> 132 | Substitution SNP (transversion) | 51.5% -> 51.9%    | 4.20E-180                     | RH -> RY          | nucleoside permease CDS | nucleoside permease | Substitution   | KLI70272.1 |
| Variant: VaAres1_A_FDSW210055060-2r         | G    | 4024    | 4024    | 1      | T -> G   | 132        | SNP (transversion)              | 47.00%            | 4.60E-173                     | E -> D            | nucleoside permease CDS | nucleoside permease | Substitution   | KLI70272.1 |
| Variant: VaAres1_B_FDSW210055061-2r         | G    | 3957    | 3957    | 1      | A -> G   | 142        | SNP (transition)                | 34.50%            | 9.30E-129                     |                   | nucleoside permease CDS | nucleoside permease | None           | KLI70272.1 |
| Variant: VaAres1_B_FDSW210055061-2r         | AT   | 3996    | 3997    | 2      | AT       | 154 -> 155 | Substitution SNP (transversion) | 29.0% -> 29.2%    | 2.40E-114                     | RH -> RY          | nucleoside permease CDS | nucleoside permease | Substitution   | KLI70272.1 |
| Variant: VaAres1_B_FDSW210055061-2r         | G    | 4024    | 4024    | 1      | T -> G   | 161        | SNP (transversion)              | 28.60%            | 1.80E-116                     | E -> D            | nucleoside permease CDS | nucleoside permease | Substitution   | KLI70272.1 |
| Variant: VaAres1_C_FDSW210055062-1r         | GC   | 2       | 3       | 2      | TG -> GC | 64 -> 65   | Substitution SNP (transition)   | 26.2% -> 28.1%    | 2.30E-48                      |                   | nucleoside permease CDS | nucleoside permease | None           | KLI70272.1 |
| Variant: VaAres1_C_FDSW210055062-1r         | G    | 3957    | 3957    | 1      | A -> G   | 187        | SNP (transition)                | 44.40%            | 2.10E-228                     |                   | nucleoside permease CDS | nucleoside permease | None           | KLI70272.1 |
| Variant: VaAres1_C_FDSW210055062-1r         | AT   | 3996    | 3997    | 2      | AT       | 190        | Substitution SNP (transversion) | 41.60%            | 1.50E-214                     | RH -> RY          | nucleoside permease CDS | nucleoside permease | Substitution   | KLI70272.1 |
| Variant: VaAres1_C_FDSW210055062-1r         | G    | 4024    | 4024    | 1      | T -> G   | 199        | SNP (transversion)              | 38.70%            | 2.10E-198                     | E -> D            | nucleoside permease CDS | nucleoside permease | Substitution   | KLI70272.1 |
| Variant: VaphiVaphiSt2_B_A_FDSW210055054-2r | GC   | 2       | 3       | 2      | TG -> GC | 71         | Substitution                    | 25.40%            | 1.20E-43                      |                   | nucleoside permease CDS | nucleoside permease | None           | KLI70272.1 |
| Variant: VaphiVaphiSt2_B_A_FDSW210055054-2r | G    | 3957    | 3957    | 1      | A -> G   | 159        | SNP (transition)                | 40.90%            | 3.20E-176                     |                   | nucleoside permease CDS | nucleoside permease | None           | KLI70272.1 |
| Variant: VaphiVaphiSt2_B_A_FDSW210055054-2r | AT   | 3996    | 3997    | 2      | AT       | 170 -> 171 | Substitution                    | 37.4% -> 37.6%    | 1.20E-170                     | RH -> RY          | nucleoside permease CDS | nucleoside permease | Substitution   | KLI70272.1 |
| Variant: VaphiVaphiSt2_B_A_FDSW210055054-2r | G    | 4024    | 4024    | 1      | T -> G   | 164        | SNP (transversion)              | 39.60%            | 4.10E-175                     | E -> D            | nucleoside permease CDS | nucleoside permease | Substitution   | KLI70272.1 |
| Variant: VaphiSt2_B_FDSW210055056-1r        | GC   | 2       | 3       | 2      | TG -> GC | 135 -> 136 | Substitution                    | 27.4% -> 28.7%    | 4.50E-99                      |                   | nucleoside permease CDS | nucleoside permease | None           | KLI70272.1 |
| Variant: VaphiSt2_B_FDSW210055056-1r        | G    | 3957    | 3957    | 1      | A -> G   | 291        | SNP (transition)                | 34.40%            | 9.30E-251                     |                   | nucleoside permease CDS | nucleoside permease | None           | KLI70272.1 |

|                                                                                      |    |      |      |   |          |            |                                       |                |           |          |                                                          |                                                  |                                      |                                  |
|--------------------------------------------------------------------------------------|----|------|------|---|----------|------------|---------------------------------------|----------------|-----------|----------|----------------------------------------------------------|--------------------------------------------------|--------------------------------------|----------------------------------|
| Variants:<br>VaphiSt2_B_FDSW210055056-1r<br>Variants:<br>VaphiSt2_B_FDSW210055056-1r | AT | 3996 | 3997 | 2 | GC -> AT | 307 -> 308 | Substitution<br>SNP<br>(transversion) | 33.4% -> 33.6% | 6.40E-257 | RH -> RY | nucleoside<br>permease CDS<br>nucleoside<br>permease CDS | nucleoside<br>permease<br>nucleoside<br>permease | Substituti<br>on<br>Substituti<br>on | KLI702<br>72.1<br>KLI702<br>72.1 |
|                                                                                      | G  | 4024 | 4024 | 1 | T -> G   |            |                                       | 34.10%         | 3.00E-273 | E -> D   |                                                          |                                                  |                                      |                                  |

## Contig 40

| Variant                                      | Name | Minimum | Maximum | Length | Change | Coverage | Polymorphism Type  | Variant Frequency | Variant P-Value (approximate) |
|----------------------------------------------|------|---------|---------|--------|--------|----------|--------------------|-------------------|-------------------------------|
| Variants: VaAphrodite_A_FDSW210055057-2r     | C    | 66081   | 66081   | 1      | G -> C | 448      | SNP (transversion) | 39.70%            | 0                             |
| Variants: VaAphrodite_A_FDSW210055057-2r     | G    | 66087   | 66087   | 1      | A -> G | 460      | SNP (transition)   | 38.90%            | 0                             |
| Variants: VaAphrodite_A_FDSW210055057-2r     | A    | 66092   | 66092   | 1      | G -> A | 463      | SNP (transition)   | 39.30%            | 0                             |
| Variants: VaAphrodite_A_FDSW210055057-2r     | T    | 66114   | 66114   | 1      | C -> T | 498      | SNP (transition)   | 44.20%            | 0                             |
| Variants: VaAphrodite_B_FDSW210055058-2r     | C    | 66081   | 66081   | 1      | G -> C | 350      | SNP (transversion) | 42.00%            | 0                             |
| Variants: VaAphrodite_B_FDSW210055058-2r     | G    | 66087   | 66087   | 1      | A -> G | 373      | SNP (transition)   | 42.60%            | 0                             |
| Variants: VaAphrodite_B_FDSW210055058-2r     | A    | 66092   | 66092   | 1      | G -> A | 375      | SNP (transition)   | 43.20%            | 0                             |
| Variants: VaAphrodite_B_FDSW210055058-2r     | T    | 66114   | 66114   | 1      | C -> T | 432      | SNP (transition)   | 45.60%            | 0                             |
| Variants: VaAphrodite_C_FDSW210055059-1r     | C    | 66081   | 66081   | 1      | G -> C | 497      | SNP (transversion) | 44.30%            | 0                             |
| Variants: VaAphrodite_C_FDSW210055059-1r     | G    | 66087   | 66087   | 1      | A -> G | 513      | SNP (transition)   | 44.60%            | 0                             |
| Variants: VaAphrodite_C_FDSW210055059-1r     | A    | 66092   | 66092   | 1      | G -> A | 519      | SNP (transition)   | 45.90%            | 0                             |
| Variants: VaAphrodite_C_FDSW210055059-1r     | T    | 66114   | 66114   | 1      | C -> T | 562      | SNP (transition)   | 47.50%            | 0                             |
| Variants: VaAres1_A_FDSW210055060-2r         | C    | 66081   | 66081   | 1      | G -> C | 303      | SNP (transversion) | 43.90%            | 4.9E-324                      |
| Variants: VaAres1_A_FDSW210055060-2r         | G    | 66087   | 66087   | 1      | A -> G | 304      | SNP (transition)   | 45.10%            | 0                             |
| Variants: VaAres1_A_FDSW210055060-2r         | A    | 66092   | 66092   | 1      | G -> A | 307      | SNP (transition)   | 46.60%            | 0                             |
| Variants: VaAres1_A_FDSW210055060-2r         | T    | 66114   | 66114   | 1      | C -> T | 320      | SNP (transition)   | 49.10%            | 0                             |
| Variants: VaAres1_B_FDSW210055061-2r         | C    | 66081   | 66081   | 1      | G -> C | 393      | SNP (transversion) | 39.70%            | 0                             |
| Variants: VaAres1_B_FDSW210055061-2r         | G    | 66087   | 66087   | 1      | A -> G | 400      | SNP (transition)   | 40.00%            | 0                             |
| Variants: VaAres1_B_FDSW210055061-2r         | A    | 66092   | 66092   | 1      | G -> A | 405      | SNP (transition)   | 40.70%            | 0                             |
| Variants: VaAres1_B_FDSW210055061-2r         | T    | 66114   | 66114   | 1      | C -> T | 423      | SNP (transition)   | 42.80%            | 0                             |
| Variants: VaAres1_C_FDSW210055062-1r         | C    | 66081   | 66081   | 1      | G -> C | 464      | SNP (transversion) | 38.10%            | 0                             |
| Variants: VaAres1_C_FDSW210055062-1r         | G    | 66087   | 66087   | 1      | A -> G | 480      | SNP (transition)   | 39.20%            | 0                             |
| Variants: VaAres1_C_FDSW210055062-1r         | A    | 66092   | 66092   | 1      | G -> A | 486      | SNP (transition)   | 39.70%            | 0                             |
| Variants: VaAres1_C_FDSW210055062-1r         | T    | 66114   | 66114   | 1      | C -> T | 520      | SNP (transition)   | 40.80%            | 0                             |
| Variants: VaphiVaphiSt2_B_A_FDSW210055054-2r | C    | 66081   | 66081   | 1      | G -> C | 252      | SNP (transversion) | 41.70%            | 3.20E-274                     |
| Variants: VaphiVaphiSt2_B_A_FDSW210055054-2r | G    | 66087   | 66087   | 1      | A -> G | 269      | SNP (transition)   | 42.80%            | 8.00E-302                     |
| Variants: VaphiVaphiSt2_B_A_FDSW210055054-2r | A    | 66092   | 66092   | 1      | G -> A | 274      | SNP (transition)   | 42.30%            | 3.30E-292                     |
| Variants: VaphiVaphiSt2_B_A_FDSW210055054-2r | T    | 66114   | 66114   | 1      | C -> T | 298      | SNP (transition)   | 48.70%            | 0                             |
| Variants: VaphiSt2_B_FDSW210055056-1r        | C    | 66081   | 66081   | 1      | G -> C | 537      | SNP (transversion) | 38.90%            | 0                             |

|                                       |   |       |       |   |        |     |                  |        |   |
|---------------------------------------|---|-------|-------|---|--------|-----|------------------|--------|---|
| Variants: VaphiSt2_B_FDSW210055056-1r | G | 66087 | 66087 | 1 | A -> G | 555 | SNP (transition) | 40.40% | 0 |
| Variants: VaphiSt2_B_FDSW210055056-1r | A | 66092 | 66092 | 1 | G -> A | 568 | SNP (transition) | 40.70% | 0 |
| Variants: VaphiSt2_B_FDSW210055056-1r | T | 66114 | 66114 | 1 | C -> T | 598 | SNP (transition) | 44.10% | 0 |



## Contig 46

| Variant                                      | Name | Minimum | Maximum | Length | Change | Coverage | Polymorphism Type  | Variant Frequency | Variant P-Value (approximate) |
|----------------------------------------------|------|---------|---------|--------|--------|----------|--------------------|-------------------|-------------------------------|
| Variants: VaAphrodite_A_FDSW210055057-2r     | G    | 1920    | 1920    | 1      | A -> G | 162      | SNP (transition)   | 30.90%            | 1.70E-98                      |
| Variants: VaAphrodite_A_FDSW210055057-2r     | A    | 1999    | 1999    | 1      | C -> A | 181      | SNP (transversion) | 34.80%            | 8.60E-109                     |
| Variants: VaAphrodite_A_FDSW210055057-2r     | G    | 2012    | 2012    | 1      | A -> G | 177      | SNP (transition)   | 31.10%            | 6.00E-92                      |
| Variants: VaAphrodite_B_FDSW210055058-2r     | G    | 1920    | 1920    | 1      | A -> G | 157      | SNP (transition)   | 31.80%            | 2.90E-114                     |
| Variants: VaAphrodite_B_FDSW210055058-2r     | A    | 1999    | 1999    | 1      | C -> A | 177      | SNP (transversion) | 28.80%            | 2.00E-83                      |
| Variants: VaAres1_A_FDSW210055060-2r         | G    | 1920    | 1920    | 1      | A -> G | 95       | SNP (transition)   | 31.60%            | 4.30E-60                      |
| Variants: VaAres1_A_FDSW210055060-2r         | A    | 1999    | 1999    | 1      | C -> A | 97       | SNP (transversion) | 32.00%            | 2.50E-65                      |
| Variants: VaAres1_B_FDSW210055061-2r         | A    | 1890    | 1890    | 1      | G -> A | 106      | SNP (transition)   | 27.40%            | 1.40E-67                      |
| Variants: VaAres1_B_FDSW210055061-2r         | G    | 1920    | 1920    | 1      | A -> G | 122      | SNP (transition)   | 36.90%            | 1.80E-124                     |
| Variants: VaAres1_B_FDSW210055061-2r         | A    | 1999    | 1999    | 1      | C -> A | 138      | SNP (transversion) | 34.80%            | 5.50E-112                     |
| Variants: VaAres1_B_FDSW210055061-2r         | G    | 2012    | 2012    | 1      | A -> G | 127      | SNP (transition)   | 29.10%            | 6.60E-76                      |
| Variants: VaAres1_C_FDSW210055062-1r         | G    | 1920    | 1920    | 1      | A -> G | 167      | SNP (transition)   | 31.70%            | 8.30E-137                     |
| Variants: VaAres1_C_FDSW210055062-1r         | A    | 1999    | 1999    | 1      | C -> A | 182      | SNP (transversion) | 39.60%            | 3.30E-136                     |
| Variants: VaAres1_C_FDSW210055062-1r         | G    | 2012    | 2012    | 1      | A -> G | 175      | SNP (transition)   | 33.10%            | 2.70E-87                      |
| Variants: VaphiVaphiSt2_B_A_FDSW210055054-2r | A    | 1999    | 1999    | 1      | C -> A | 122      | SNP (transversion) | 34.40%            | 3.30E-81                      |
| Variants: VaphiSt2_B_FDSW210055056-1r        | G    | 1920    | 1920    | 1      | A -> G | 249      | SNP (transition)   | 25.30%            | 7.10E-130                     |
| Variants: VaphiSt2_B_FDSW210055056-1r        | A    | 1999    | 1999    | 1      | C -> A | 275      | SNP (transversion) | 37.80%            | 1.60E-224                     |
| Variants: VaphiSt2_B_FDSW210055056-1r        | G    | 2012    | 2012    | 1      | A -> G | 269      | SNP (transition)   | 30.50%            | 1.00E-151                     |

## Contig 49

| Variant                                 | Name | Minimum | Maximum | Length | Change     | Coverage   | Polymorphism Type  | Variant Frequency | Variant P-Value (approximate) | Amino Acid Change | CDS    | product                  | Protein Effect       | protein_id   |             |
|-----------------------------------------|------|---------|---------|--------|------------|------------|--------------------|-------------------|-------------------------------|-------------------|--------|--------------------------|----------------------|--------------|-------------|
| Variant: VaAphrodite_A_FDSW210055057-2r | C    | 2       | 2       | 1      | A -> C     | 781        | SNP (transversion) | 61.50%            |                               | 0                 |        | hypothetical protein CDS | hypothetical protein | None         | KLI700 43.1 |
| Variant: VaAphrodite_A_FDSW210055057-2r | C    | 8       | 8       | 1      | G -> C     | 767        | SNP (transversion) | 60.20%            |                               | 0                 | D -> E | hypothetical protein CDS | hypothetical protein | Substitution | KLI700 43.1 |
| Variant: VaAphrodite_A_FDSW210055057-2r | A    | 47      | 47      | 1      | G -> A     | 604        | SNP (transition)   | 58.80%            |                               | 0                 |        | hypothetical protein CDS | hypothetical protein | None         | KLI700 43.1 |
| Variant: VaAphrodite_A_FDSW210055057-2r | A    | 53      | 53      | 1      | G -> A     | 589        | SNP (transition)   | 60.60%            |                               | 0                 |        | hypothetical protein CDS | hypothetical protein | None         | KLI700 43.1 |
| Variant: VaAphrodite_A_FDSW210055057-2r | A    | 56      | 56      | 1      | G -> A     | 579        | SNP (transition)   | 67.90%            |                               | 0                 |        | hypothetical protein CDS | hypothetical protein | None         | KLI700 43.1 |
| Variant: VaAphrodite_A_FDSW210055057-2r | G    | 59      | 59      | 1      | A -> G     | 559        | SNP (transition)   | 70.30%            |                               | 0                 |        | hypothetical protein CDS | hypothetical protein | None         | KLI700 43.1 |
| Variant: VaAphrodite_A_FDSW210055057-2r | G    | 62      | 62      | 1      | A -> G     | 541        | SNP (transition)   | 69.50%            |                               | 0                 |        | hypothetical protein CDS | hypothetical protein | None         | KLI700 43.1 |
| Variant: VaAphrodite_A_FDSW210055057-2r | G    | 73      | 73      | 1      | A -> G     | 491        | SNP (transition)   | 67.20%            |                               | 0                 |        | hypothetical protein CDS | hypothetical protein | None         | KLI700 43.1 |
| Variant: VaAphrodite_A_FDSW210055057-2r | G    | 101     | 101     | 1      | A -> G     | 369        | SNP (transition)   | 55.80%            |                               | 0                 |        | hypothetical protein CDS | hypothetical protein | None         | KLI700 43.1 |
| Variant: VaAphrodite_A_FDSW210055057-2r | CG   | 109     | 110     | 2      | TC -> CG   | 322 -> 328 | Substitution       | 46.9% -> 47.3%    | 4.30E-195                     | AI -> AV          |        | hypothetical protein CDS | hypothetical protein | Substitution | KLI700 43.1 |
| Variant: VaAphrodite_A_FDSW210055057-2r | AT   | 113     | 114     | 2      | CG -> AT   | 301 -> 307 | Substitution       | 42.5% -> 44.3%    | 4.50E-121                     | T -> N            |        | hypothetical protein CDS | hypothetical protein | Substitution | KLI700 43.1 |
| Variant: VaAphrodite_A_FDSW210055057-2r | G    | 341     | 341     | 1      | A -> G     | 200        | SNP (transition)   | 32.50%            | 3.40E-168                     |                   |        | hypothetical protein CDS | hypothetical protein | None         | KLI700 43.1 |
| Variant: VaAphrodite_A_FDSW210055057-2r | T    | 348     | 348     | 1      | C -> T     | 246        | SNP (transition)   | 34.60%            | 1.20E-230                     | G -> D            |        | hypothetical protein CDS | hypothetical protein | Substitution | KLI700 43.1 |
| Variant: VaAphrodite_A_FDSW210055057-2r | G    | 359     | 359     | 1      | A -> G     | 327        | SNP (transition)   | 30.60%            | 1.20E-264                     |                   |        | hypothetical protein CDS | hypothetical protein | None         | KLI700 43.1 |
| Variant: VaAphrodite_A_FDSW210055057-2r | T    | 371     | 371     | 1      | C -> T     | 430        | SNP (transition)   | 26.00%            | 3.30E-298                     |                   |        | hypothetical protein CDS | hypothetical protein | None         | KLI700 43.1 |
| Variant: VaAphrodite_A_FDSW210055057-2r | A    | 374     | 374     | 1      | G -> A     | 461        | SNP (transition)   | 42.70%            |                               | 0                 |        | hypothetical protein CDS | hypothetical protein | None         | KLI700 43.1 |
| Variant: VaAphrodite_A_FDSW210055057-2r | C    | 386     | 386     | 1      | T -> C     | 590        | SNP (transition)   | 76.60%            |                               | 0                 |        | hypothetical protein CDS | hypothetical protein | None         | KLI700 43.1 |
| Variant: VaAphrodite_A_FDSW210055057-2r | T    | 392     | 392     | 1      | G -> T     | 641        | SNP (transversion) | 74.60%            |                               | 0                 | N -> K | hypothetical protein CDS | hypothetical protein | Substitution | KLI700 43.1 |
| Variant: VaAphrodite_A_FDSW210055057-2r | A    | 395     | 395     | 1      | G -> A     | 670        | SNP (transition)   | 63.30%            |                               | 0                 |        | hypothetical protein CDS | hypothetical protein | None         | KLI700 43.1 |
| Variant: VaAphrodite_A_FDSW210055057-2r | A    | 407     | 407     | 1      | G -> A     | 758        | SNP (transition)   | 37.50%            |                               | 0                 |        | hypothetical protein CDS | hypothetical protein | None         | KLI700 43.1 |
| Variant: VaAphrodite_A_FDSW210055057-2r | C    | 413     | 413     | 1      | T -> C     | 815        | SNP (transition)   | 82.10%            |                               | 0                 |        | hypothetical protein CDS | hypothetical protein | None         | KLI700 43.1 |
| Variant: VaAphrodite_A_FDSW210055057-2r | T    | 416     | 416     | 1      | A -> T     | 840        | SNP (transversion) | 65.50%            |                               | 0                 |        | hypothetical protein CDS | hypothetical protein | None         | KLI700 43.1 |
| Variant: VaAphrodite_A_FDSW210055057-2r | CG   | 419     | 421     | 2      | GGT -> CGC | 858 -> 875 | Substitution       | 39.5% -> 40.3%    |                               | 0                 | T -> A | hypothetical protein CDS | hypothetical protein | Substitution | KLI700 43.1 |
| Variant: VaAphrodite_A_FDSW210055057-2r | C    | 421     | 421     | 1      | T -> C     | 875        | SNP (transition)   | 32.30%            |                               | 0                 | T -> A | hypothetical protein CDS | hypothetical protein | Substitution | KLI700 43.1 |
| Variant: VaAphrodite_A_FDSW210055057-2r | T    | 422     | 422     | 1      | A -> T     | 885        | SNP (transversion) | 74.70%            |                               | 0                 |        | hypothetical protein CDS | hypothetical protein | None         | KLI700 43.1 |
| Variant: VaAphrodite_A_FDSW210055057-2r | T    | 425     | 425     | 1      | C -> T     | 919        | SNP (transition)   | 56.60%            |                               | 0                 |        | hypothetical protein CDS | hypothetical protein | None         | KLI700 43.1 |
| Variant: VaAphrodite_A_FDSW210055057-2r | G    | 428     | 428     | 1      | A -> G     | 936        | SNP (transition)   | 80.00%            |                               | 0                 |        | hypothetical protein CDS | hypothetical protein | None         | KLI700 43.1 |
| Variant: VaAphrodite_A_FDSW210055057-2r | C    | 452     | 452     | 1      | T -> C     | 1184       | SNP (transition)   | 46.50%            |                               | 0                 |        | hypothetical protein CDS | hypothetical protein | None         | KLI700 43.1 |
| Variant: VaAphrodite_A_FDSW210055057-2r | A    | 455     | 455     | 1      | G -> A     | 1220       | SNP (transition)   | 40.60%            |                               | 0                 |        | hypothetical protein CDS | hypothetical protein | None         | KLI700 43.1 |

|            |              |                |           |                          |                      |              |             |
|------------|--------------|----------------|-----------|--------------------------|----------------------|--------------|-------------|
| SNP        | 1359         | 38.30%         | 0         | hypothetical protein CDS | hypothetical protein | None         | KLI700 43.1 |
| SNP        | 1389         | 51.10%         | 0         | hypothetical protein CDS | hypothetical protein | None         | KLI700 43.1 |
| SNP        | 1451         | 60.90%         | 0         | hypothetical protein CDS | hypothetical protein | None         | KLI700 43.1 |
| CAA -> TAG | 1467 -> 1490 | 26.2% -> 26.7% | 0         | hypothetical protein CDS | hypothetical protein | None         | KLI700 43.1 |
| SNP        | 1490         | 28.40%         | 0         | hypothetical protein CDS | hypothetical protein | None         | KLI700 43.1 |
| CGC -> GGT | 1494 -> 1508 | 27.4% -> 27.5% | 0         | hypothetical protein CDS | hypothetical protein | Substitution | KLI700 43.1 |
| SNP        | 1549         | 28.00%         | 0         | hypothetical protein CDS | hypothetical protein | None         | KLI700 43.1 |
| SNP        | 1586         | 56.00%         | 0         | hypothetical protein CDS | hypothetical protein | None         | KLI700 43.1 |
| SNP        | 1669         | 36.40%         | 0         | hypothetical protein CDS | hypothetical protein | None         | KLI700 43.1 |
| SNP        | 1735         | 32.60%         | 0         | hypothetical protein CDS | hypothetical protein | None         | KLI700 43.1 |
| SNP        | 1837         | 43.20%         | 0         | hypothetical protein CDS | hypothetical protein | None         | KLI700 43.1 |
| SNP        | 1845         | 35.00%         | 0         | hypothetical protein CDS | hypothetical protein | None         | KLI700 43.1 |
| SNP        | 1828         | 28.70%         | 0         | hypothetical protein CDS | hypothetical protein | None         | KLI700 43.1 |
| SNP        | 1811         | 44.10%         | 0         | hypothetical protein CDS | hypothetical protein | Substitution | KLI700 43.1 |
| SNP        | 1784         | 25.40%         | 0         | hypothetical protein CDS | hypothetical protein | None         | KLI700 43.1 |
| SNP        | 1698         | 30.90%         | 0         | hypothetical protein CDS | hypothetical protein | None         | KLI700 43.1 |
| SNP        | 1679         | 28.50%         | 0         | hypothetical protein CDS | hypothetical protein | Substitution | KLI700 43.1 |
| SNP        | 1642         | 40.30%         | 0         | hypothetical protein CDS | hypothetical protein | None         | KLI700 43.1 |
| SNP        | 1405         | 30.00%         | 0         | hypothetical protein CDS | hypothetical protein | None         | KLI700 43.1 |
| SNP        | 1357         | 26.20%         | 0         | hypothetical protein CDS | hypothetical protein | None         | KLI700 43.1 |
| SNP        | 1273         | 70.20%         | 0         | hypothetical protein CDS | hypothetical protein | None         | KLI700 43.1 |
| SNP        | 1206         | 26.70%         | 0         | hypothetical protein CDS | hypothetical protein | Substitution | KLI700 43.1 |
| SNP        | 1183         | 26.60%         | 0         | hypothetical protein CDS | hypothetical protein | None         | KLI700 43.1 |
| SNP        | 1156         | 32.30%         | 0         | hypothetical protein CDS | hypothetical protein | None         | KLI700 43.1 |
| SNP        | 1030         | 27.40%         | 0         | hypothetical protein CDS | hypothetical protein | None         | KLI700 43.1 |
| SNP        | 881          | 73.10%         | 0         | hypothetical protein CDS | hypothetical protein | None         | KLI700 43.1 |
| SNP        | 854          | 58.40%         | 0         | hypothetical protein CDS | hypothetical protein | Substitution | KLI700 43.1 |
| SNP        | 826          | 57.30%         | 0         | hypothetical protein CDS | hypothetical protein | Substitution | KLI700 43.1 |
| SNP        | 802          | 71.90%         | 0         | hypothetical protein CDS | hypothetical protein | Substitution | KLI700 43.1 |
| SNP        | 812          | 64.50%         | 0         | hypothetical protein CDS | hypothetical protein | None         | KLI700 43.1 |
| GG -> CA   | 813 -> 815   | 29.8% -> 30.1% | 0         | hypothetical protein CDS | hypothetical protein | Substitution | KLI700 43.1 |
| SNP        | 812          | 26.00%         | 1.30E-307 | hypothetical protein CDS | hypothetical protein | None         | KLI700 43.1 |

|              |            |                |           |                          |                      |        |        |
|--------------|------------|----------------|-----------|--------------------------|----------------------|--------|--------|
| SNP          | 817        | 44.80%         | 0         | hypothetical protein CDS | hypothetical protein | None   | KLI700 |
| SNP          | 829        | 79.00%         | 0         | hypothetical protein CDS | hypothetical protein | None   | KLI700 |
| SNP          | 829        | 27.30%         | 2.0E-312  | hypothetical protein CDS | hypothetical protein | None   | KLI700 |
| SNP          | 851        | 79.90%         | 0         | hypothetical protein CDS | hypothetical protein | None   | KLI700 |
| SNP          | 880        | 30.50%         | 0         | hypothetical protein CDS | hypothetical protein | None   | KLI700 |
| Substitution | 973 -> 974 | 27.00%         | 0         | I -> V                   | Substituti on        | KLI700 | 43.1   |
| SNP          | 974        | 55.50%         | 0         | I -> V                   | Substituti on        | KLI700 | 43.1   |
| SNP          | 979        | 52.90%         | 0         |                          | None                 | KLI700 | 43.1   |
| SNP          | 979        | 29.90%         | 0         |                          | None                 | KLI700 | 43.1   |
| SNP          | 984        | 52.60%         | 0         |                          | None                 | KLI700 | 43.1   |
| Substitution | 984 -> 993 | 29.4% -> 29.7% | 4.30E-303 | T -> N                   | Substituti on        | KLI700 | 43.1   |
| SNP          | 1000       | 52.80%         | 0         |                          | None                 | KLI700 | 43.1   |
| Substitution | 997 -> 999 | 52.10%         | 0         | TN -> KD                 | Substituti on        | KLI700 | 43.1   |
| SNP          | 997        | 51.80%         | 0         |                          | None                 | KLI700 | 43.1   |
| SNP          | 1011       | 37.70%         | 0         |                          | None                 | KLI700 | 43.1   |
| SNP          | 1013       | 25.30%         | 7.7E-319  |                          | None                 | KLI700 | 43.1   |
| SNP          | 1027       | 48.60%         | 0         |                          | None                 | KLI700 | 43.1   |
| SNP          | 1055       | 68.40%         | 0         |                          | None                 | KLI700 | 43.1   |
| SNP          | 1064       | 68.80%         | 0         |                          | None                 | KLI700 | 43.1   |
| SNP          | 1137       | 31.90%         | 0         |                          | None                 | KLI700 | 43.1   |
| SNP          | 1191       | 43.00%         | 0         |                          | None                 | KLI700 | 43.1   |
| SNP          | 1191       | 34.20%         | 0         |                          | None                 | KLI700 | 43.1   |
| SNP          | 1192       | 29.40%         | 0         |                          | None                 | KLI700 | 43.1   |
| SNP          | 1250       | 57.30%         | 0         | A -> T                   | Substituti on        | KLI700 | 43.1   |
| SNP          | 1251       | 32.10%         | 0         |                          | None                 | KLI700 | 43.1   |
| SNP          | 1251       | 39.20%         | 0         |                          | None                 | KLI700 | 43.1   |
| SNP          | 1256       | 54.00%         | 0         | Y -> F                   | Substituti on        | KLI700 | 43.1   |
| SNP          | 638        | 56.40%         | 0         |                          | None                 | KLI700 | 43.1   |
| SNP          | 621        | 55.20%         | 0         | D -> E                   | Substituti on        | KLI700 | 43.1   |
| SNP          | 478        | 52.50%         | 0         |                          | None                 | KLI700 | 43.1   |
| SNP          | 459        | 56.40%         | 0         |                          | None                 | KLI700 | 43.1   |
| SNP          | 452        | 66.60%         | 0         |                          | None                 | KLI700 | 43.1   |

|                    |            |                |           |                          |                          |             |        |
|--------------------|------------|----------------|-----------|--------------------------|--------------------------|-------------|--------|
| SNP                | 441        | 70.10%         | 0         | hypothetical protein CDS | hypothetical protein     | None        | KLI700 |
| SNP (transition)   | 423        | 69.50%         | 0         | hypothetical protein CDS | hypothetical protein     | None        | KLI700 |
| SNP (transition)   | 380        | 67.10%         | 0         | hypothetical protein CDS | hypothetical protein     | None        | KLI700 |
| SNP (transition)   | 288        | 54.20%         | 7.10E-275 | hypothetical protein CDS | hypothetical protein     | None        | KLI700 |
| SNP (transition)   | 259        | 49.80%         | 2.10E-195 | I -> V                   | hypothetical protein CDS | Substituted | KLI700 |
| SNP (transversion) | 255        | 42.00%         | 1.70E-162 | hypothetical protein CDS | hypothetical protein     | None        | KLI700 |
| CG -> AT           | 244 -> 245 | 38.4% -> 38.9% | 2.80E-112 | T -> N                   | hypothetical protein CDS | Substituted | KLI700 |
| Substitution       | 229        | 44.10%         | 2.00E-186 | hypothetical protein CDS | hypothetical protein     | None        | KLI700 |
| SNP (transition)   | 248        | 26.60%         | 1.20E-137 | hypothetical protein CDS | hypothetical protein     | None        | KLI700 |
| SNP (transversion) | 272        | 49.60%         | 9.7E-312  | T -> A                   | hypothetical protein CDS | Substituted | KLI700 |
| SNP (transversion) | 282        | 41.80%         | 1.60E-237 | hypothetical protein CDS | hypothetical protein     | None        | KLI700 |
| SNP (transition)   | 298        | 27.20%         | 4.00E-137 | hypothetical protein CDS | hypothetical protein     | None        | KLI700 |
| SNP (transition)   | 326        | 52.50%         | 0         | hypothetical protein CDS | hypothetical protein     | None        | KLI700 |
| SNP (transition)   | 475        | 32.00%         | 0         | hypothetical protein CDS | hypothetical protein     | None        | KLI700 |
| SNP (transition)   | 485        | 38.80%         | 0         | hypothetical protein CDS | hypothetical protein     | None        | KLI700 |
| SNP (transition)   | 583        | 27.40%         | 0         | hypothetical protein CDS | hypothetical protein     | None        | KLI700 |
| SNP (transversion) | 607        | 52.40%         | 0         | hypothetical protein CDS | hypothetical protein     | None        | KLI700 |
| SNP (transversion) | 661        | 64.10%         | 0         | hypothetical protein CDS | hypothetical protein     | None        | KLI700 |
| CAA -> TAG         | 678 -> 699 | 27.3% -> 28.2% | 0         | hypothetical protein CDS | hypothetical protein     | None        | KLI700 |
| CGC -> GGT         | 702 -> 718 | 27.9% -> 28.5% | 0         | A -> T                   | hypothetical protein CDS | Substituted | KLI700 |
| Substitution       | 804        | 29.00%         | 0         | hypothetical protein CDS | hypothetical protein     | None        | KLI700 |
| SNP (transition)   | 895        | 52.00%         | 0         | hypothetical protein CDS | hypothetical protein     | None        | KLI700 |
| SNP (transversion) | 1083       | 39.00%         | 0         | hypothetical protein CDS | hypothetical protein     | None        | KLI700 |
| SNP (transition)   | 1266       | 32.90%         | 0         | hypothetical protein CDS | hypothetical protein     | None        | KLI700 |
| CA -> GG           | 1288       | 25.30%         | 0         | V -> A                   | hypothetical protein CDS | Substituted | KLI700 |
| Substitution       | 1276       | 39.70%         | 0         | hypothetical protein CDS | hypothetical protein     | None        | KLI700 |
| SNP (transition)   | 1271       | 33.00%         | 0         | hypothetical protein CDS | hypothetical protein     | None        | KLI700 |
| SNP (transition)   | 1232       | 38.40%         | 0         | N -> D                   | hypothetical protein CDS | Substituted | KLI700 |
| SNP (transition)   | 1175       | 25.70%         | 0         | hypothetical protein CDS | hypothetical protein     | None        | KLI700 |
| SNP (transition)   | 1126       | 28.60%         | 0         | S -> N                   | hypothetical protein CDS | Substituted | KLI700 |
| SNP (transition)   | 1101       | 46.10%         | 0         | hypothetical protein CDS | hypothetical protein     | None        | KLI700 |
| SNP (transition)   | 968        | 30.10%         | 0         | hypothetical protein CDS | hypothetical protein     | None        | KLI700 |

|     |  |  |  |  |  |  |  |  |  |  |  |  |  |  |  |  |  |  |  |  |  |  |  |  |  |  |  |  |  |  |  |  |  |  |  |  |  |  |  |  |  |  |  |  |  |  |  |  |  |  |  |  |  |  |  |  |  |  |  |  |  |  |  |  |  |  |  |  |  |  |  |  |  |  |  |  |  |  |  |  |  |  |  |  |  |  |  |  |  |  |  |  |  |  |  |  |  |  |  |  |  |  |  |  |  |  |  |  |  |  |  |  |  |  |  |  |  |  |  |  |  |  |  |  |  |  |  |  |  |  |  |  |  |  |  |  |  |  |  |  |  |  |  |  |  |  |  |  |  |  |  |  |  |  |  |  |  |  |  |  |  |  |  |  |  |  |  |  |  |  |  |  |  |  |  |  |  |  |  |  |  |  |  |  |  |  |  |  |  |  |  |  |  |  |  |  |  |  |  |  |  |  |  |  |  |  |  |  |  |  |  |  |  |  |  |  |  |  |  |  |  |  |  |  |  |  |  |  |  |  |  |  |  |  |  |  |  |  |  |  |  |  |  |  |  |  |  |  |  |  |  |  |  |  |  |  |  |  |  |  |  |  |  |  |  |  |  |  |  |  |  |  |  |  |  |  |  |  |  |  |  |  |  |  |  |  |  |  |  |  |  |  |  |  |  |  |  |  |  |  |  |  |  |  |  |  |  |  |  |  |  |  |  |  |  |  |  |  |  |  |  |  |  |  |  |  |  |  |  |  |  |  |  |  |  |  |  |  |  |  |  |  |  |  |  |  |  |  |  |  |  |  |  |  |  |  |  |  |  |  |  |  |  |  |  |  |  |  |  |  |  |  |  |  |  |  |  |  |  |  |  |  |  |  |  |  |  |  |  |  |  |  |  |  |  |  |  |  |  |  |  |  |  |  |  |  |  |  |  |  |  |  |  |  |  |  |  |  |  |  |  |  |  |  |  |  |  |  |  |  |  |  |  |  |  |  |  |  |  |  |  |  |  |  |  |  |  |  |  |  |  |  |  |  |  |  |  |  |  |  |  |  |  |  |  |  |  |  |  |  |  |  |  |  |  |  |  |  |  |  |  |  |  |  |  |  |  |  |  |  |  |  |  |  |  |  |  |  |  |  |  |  |  |  |  |  |  |  |  |  |  |  |  |  |  |  |  |  |  |  |  |  |  |  |  |  |  |  |  |  |  |  |  |  |  |  |  |  |  |  |  |  |  |  |  |  |  |  |  |  |  |  |  |  |  |  |  |  |  |  |  |  |  |  |  |  |  |  |  |  |  |  |  |  |  |  |  |  |  |  |  |  |  |  |  |  |  |  |  |  |  |  |  |  |  |  |  |  |  |  |  |  |  |  |  |  |  |  |  |  |  |  |  |  |  |  |  |  |  |  |  |  |  |  |  |  |  |  |  |  |  |  |  |  |  |  |  |  |  |  |  |  |  |  |  |  |  |  |  |  |  |  |  |  |  |  |  |  |  |  |  |  |  |  |  |  |  |  |  |  |  |  |  |  |  |  |  |  |  |  |  |  |  |  |  |  |  |  |  |  |  |  |  |  |  |  |  |  |  |  |  |  |  |  |  |  |  |  |  |  |  |  |  |  |  |  |  |  |  |  |  |  |  |  |  |  |  |  |  |  |  |  |  |  |  |  |  |  |  |  |  |  |  |  |  |  |  |  |  |  |  |  |  |  |  |  |  |  |  |  |  |  |  |  |  |  |  |  |  |  |  |  |  |  |  |  |  |  |  |  |  |  |  |  |  |  |  |  |  |  |  |  |  |  |  |  |  |  |  |  |  |  |  |  |  |  |  |  |  |  |  |  |  |  |  |  |  |  |  |  |  |  |  |  |  |  |  |  |  |  |  |  |  |  |  |  |  |  |  |  |  |  |  |  |  |  |  |  |  |  |  |  |  |  |  |  |  |  |  |  |  |  |  |  |  |  |  |  |  |  |  |  |  |  |  |  |  |  |  |  |  |  |  |  |  |  |  |  |  |  |  |  |  |  |  |  |  |  |  |  |  |  |  |  |  |  |  |  |  |  |  |  |  |  |  |  |  |  |  |  |  |  |  |  |  |  |  |  |  |  |  |  |  |  |  |  |  |  |  |  |  |  |  |  |  |  |  |  |  |  |  |  |  |  |  |  |  |  |  |  |  |  |  |  |  |  |  |  |  |  |  |  |  |  |  |  |  |  |  |  |  |  |  |  |  |  |  |  |  |  |  |  |  |  |  |  |  |  |  |  |  |  |  |  |  |  |  |  |  |  |  |  |  |  |  |  |  |  |  |  |  |  |  |  |  |  |  |  |  |  |  |  |  |  |  |  |  |  |  |  |  |  |  |  |  |  |  |  |  |  |  |  |  |  |  |  |  |  |  |  |  |  |  |  |  |  |  |  |  |  |  |  |  |  |  |  |  |  |  |  |  |  |  |  |  |  |  |  |  |  |  |  |  |  |  |  |  |  |  |  |  |  |  |  |  |  |  |  |  |  |  |  |  |  |  |  |  |  |  |  |  |  |  |  |  |  |  |  |  |  |  |  |  |  |  |  |  |  |  |  |  |  |  |  |  |  |  |  |  |  |  |  |  |  |  |  |  |  |  |  |  |  |  |  |  |  |  |  |  |  |  |  |  |  |  |  |  |  |  |  |  |  |  |  |  |  |  |  |  |  |  |  |  |  |  |  |  |  |  |  |  |  |  |  |  |  |  |  |  |  |  |  |  |  |  |  |  |  |  |  |  |  |  |  |  |  |  |  |  |  |  |  |  |  |  |  |  |  |  |  |  |  |  |  |  |  |  |  |  |  |  |  |  |  |  |  |  |  |  |  |  |  |  |  |  |  |  |  |  |  |  |  |  |  |  |  |  |  |  |  |  |  |  |  |  |  |  |  |  |  |  |  |  |  |  |  |  |  |  |  |  |  |  |  |  |  |  |  |  |  |  |  |  |  |  |  |  |  |  |  |  |  |  |  |  |  |  |  |  |  |  |  |  |  |  |  |  |  |  |  |  |  |  |  |  |  |  |  |  |  |  |  |  |  |  |  |  |  |  |  |  |  |  |  |  |  |  |  |  |  |  |  |  |  |  |  |  |  |  |  |  |    |
|-----|--|--|--|--|--|--|--|--|--|--|--|--|--|--|--|--|--|--|--|--|--|--|--|--|--|--|--|--|--|--|--|--|--|--|--|--|--|--|--|--|--|--|--|--|--|--|--|--|--|--|--|--|--|--|--|--|--|--|--|--|--|--|--|--|--|--|--|--|--|--|--|--|--|--|--|--|--|--|--|--|--|--|--|--|--|--|--|--|--|--|--|--|--|--|--|--|--|--|--|--|--|--|--|--|--|--|--|--|--|--|--|--|--|--|--|--|--|--|--|--|--|--|--|--|--|--|--|--|--|--|--|--|--|--|--|--|--|--|--|--|--|--|--|--|--|--|--|--|--|--|--|--|--|--|--|--|--|--|--|--|--|--|--|--|--|--|--|--|--|--|--|--|--|--|--|--|--|--|--|--|--|--|--|--|--|--|--|--|--|--|--|--|--|--|--|--|--|--|--|--|--|--|--|--|--|--|--|--|--|--|--|--|--|--|--|--|--|--|--|--|--|--|--|--|--|--|--|--|--|--|--|--|--|--|--|--|--|--|--|--|--|--|--|--|--|--|--|--|--|--|--|--|--|--|--|--|--|--|--|--|--|--|--|--|--|--|--|--|--|--|--|--|--|--|--|--|--|--|--|--|--|--|--|--|--|--|--|--|--|--|--|--|--|--|--|--|--|--|--|--|--|--|--|--|--|--|--|--|--|--|--|--|--|--|--|--|--|--|--|--|--|--|--|--|--|--|--|--|--|--|--|--|--|--|--|--|--|--|--|--|--|--|--|--|--|--|--|--|--|--|--|--|--|--|--|--|--|--|--|--|--|--|--|--|--|--|--|--|--|--|--|--|--|--|--|--|--|--|--|--|--|--|--|--|--|--|--|--|--|--|--|--|--|--|--|--|--|--|--|--|--|--|--|--|--|--|--|--|--|--|--|--|--|--|--|--|--|--|--|--|--|--|--|--|--|--|--|--|--|--|--|--|--|--|--|--|--|--|--|--|--|--|--|--|--|--|--|--|--|--|--|--|--|--|--|--|--|--|--|--|--|--|--|--|--|--|--|--|--|--|--|--|--|--|--|--|--|--|--|--|--|--|--|--|--|--|--|--|--|--|--|--|--|--|--|--|--|--|--|--|--|--|--|--|--|--|--|--|--|--|--|--|--|--|--|--|--|--|--|--|--|--|--|--|--|--|--|--|--|--|--|--|--|--|--|--|--|--|--|--|--|--|--|--|--|--|--|--|--|--|--|--|--|--|--|--|--|--|--|--|--|--|--|--|--|--|--|--|--|--|--|--|--|--|--|--|--|--|--|--|--|--|--|--|--|--|--|--|--|--|--|--|--|--|--|--|--|--|--|--|--|--|--|--|--|--|--|--|--|--|--|--|--|--|--|--|--|--|--|--|--|--|--|--|--|--|--|--|--|--|--|--|--|--|--|--|--|--|--|--|--|--|--|--|--|--|--|--|--|--|--|--|--|--|--|--|--|--|--|--|--|--|--|--|--|--|--|--|--|--|--|--|--|--|--|--|--|--|--|--|--|--|--|--|--|--|--|--|--|--|--|--|--|--|--|--|--|--|--|--|--|--|--|--|--|--|--|--|--|--|--|--|--|--|--|--|--|--|--|--|--|--|--|--|--|--|--|--|--|--|--|--|--|--|--|--|--|--|--|--|--|--|--|--|--|--|--|--|--|--|--|--|--|--|--|--|--|--|--|--|--|--|--|--|--|--|--|--|--|--|--|--|--|--|--|--|--|--|--|--|--|--|--|--|--|--|--|--|--|--|--|--|--|--|--|--|--|--|--|--|--|--|--|--|--|--|--|--|--|--|--|--|--|--|--|--|--|--|--|--|--|--|--|--|--|--|--|--|--|--|--|--|--|--|--|--|--|--|--|--|--|--|--|--|--|--|--|--|--|--|--|--|--|--|--|--|--|--|--|--|--|--|--|--|--|--|--|--|--|--|--|--|--|--|--|--|--|--|--|--|--|--|--|--|--|--|--|--|--|--|--|--|--|--|--|--|--|--|--|--|--|--|--|--|--|--|--|--|--|--|--|--|--|--|--|--|--|--|--|--|--|--|--|--|--|--|--|--|--|--|--|--|--|--|--|--|--|--|--|--|--|--|--|--|--|--|--|--|--|--|--|--|--|--|--|--|--|--|--|--|--|--|--|--|--|--|--|--|--|--|--|--|--|--|--|--|--|--|--|--|--|--|--|--|--|--|--|--|--|--|--|--|--|--|--|--|--|--|--|--|--|--|--|--|--|--|--|--|--|--|--|--|--|--|--|--|--|--|--|--|--|--|--|--|--|--|--|--|--|--|--|--|--|--|--|--|--|--|--|--|--|--|--|--|--|--|--|--|--|--|--|--|--|--|--|--|--|--|--|--|--|--|--|--|--|--|--|--|--|--|--|--|--|--|--|--|--|--|--|--|--|--|--|--|--|--|--|--|--|--|--|--|--|--|--|--|--|--|--|--|--|--|--|--|--|--|--|--|--|--|--|--|--|--|--|--|--|--|--|--|--|--|--|--|--|--|--|--|--|--|--|--|--|--|--|--|--|--|--|--|--|--|--|--|--|--|--|--|--|--|--|--|--|--|--|--|--|--|--|--|--|--|--|--|--|--|--|--|--|--|--|--|--|--|--|--|--|--|--|--|--|--|--|--|--|--|--|--|--|--|--|--|--|--|--|--|--|--|--|--|--|--|--|--|--|--|--|--|--|--|--|--|--|--|--|--|--|--|--|--|--|--|--|--|--|--|--|--|--|--|--|--|--|--|--|--|--|--|--|--|--|--|--|--|--|--|--|--|--|--|--|--|--|--|--|--|--|--|--|--|--|--|--|--|--|--|--|--|--|--|--|--|--|--|--|--|--|--|--|--|--|--|--|--|--|--|--|--|--|--|--|--|--|--|--|--|--|--|--|--|--|--|--|--|--|--|--|--|--|--|--|--|--|--|--|--|--|--|--|--|--|--|--|--|--|--|--|--|--|--|--|--|--|--|--|--|--|--|--|--|--|--|--|--|--|--|--|--|--|--|--|--|--|--|--|--|--|--|--|--|--|--|--|--|--|--|--|--|--|--|--|--|--|--|--|--|--|--|--|--|--|----|
| SNP |  |  |  |  |  |  |  |  |  |  |  |  |  |  |  |  |  |  |  |  |  |  |  |  |  |  |  |  |  |  |  |  |  |  |  |  |  |  |  |  |  |  |  |  |  |  |  |  |  |  |  |  |  |  |  |  |  |  |  |  |  |  |  |  |  |  |  |  |  |  |  |  |  |  |  |  |  |  |  |  |  |  |  |  |  |  |  |  |  |  |  |  |  |  |  |  |  |  |  |  |  |  |  |  |  |  |  |  |  |  |  |  |  |  |  |  |  |  |  |  |  |  |  |  |  |  |  |  |  |  |  |  |  |  |  |  |  |  |  |  |  |  |  |  |  |  |  |  |  |  |  |  |  |  |  |  |  |  |  |  |  |  |  |  |  |  |  |  |  |  |  |  |  |  |  |  |  |  |  |  |  |  |  |  |  |  |  |  |  |  |  |  |  |  |  |  |  |  |  |  |  |  |  |  |  |  |  |  |  |  |  |  |  |  |  |  |  |  |  |  |  |  |  |  |  |  |  |  |  |  |  |  |  |  |  |  |  |  |  |  |  |  |  |  |  |  |  |  |  |  |  |  |  |  |  |  |  |  |  |  |  |  |  |  |  |  |  |  |  |  |  |  |  |  |  |  |  |  |  |  |  |  |  |  |  |  |  |  |  |  |  |  |  |  |  |  |  |  |  |  |  |  |  |  |  |  |  |  |  |  |  |  |  |  |  |  |  |  |  |  |  |  |  |  |  |  |  |  |  |  |  |  |  |  |  |  |  |  |  |  |  |  |  |  |  |  |  |  |  |  |  |  |  |  |  |  |  |  |  |  |  |  |  |  |  |  |  |  |  |  |  |  |  |  |  |  |  |  |  |  |  |  |  |  |  |  |  |  |  |  |  |  |  |  |  |  |  |  |  |  |  |  |  |  |  |  |  |  |  |  |  |  |  |  |  |  |  |  |  |  |  |  |  |  |  |  |  |  |  |  |  |  |  |  |  |  |  |  |  |  |  |  |  |  |  |  |  |  |  |  |  |  |  |  |  |  |  |  |  |  |  |  |  |  |  |  |  |  |  |  |  |  |  |  |  |  |  |  |  |  |  |  |  |  |  |  |  |  |  |  |  |  |  |  |  |  |  |  |  |  |  |  |  |  |  |  |  |  |  |  |  |  |  |  |  |  |  |  |  |  |  |  |  |  |  |  |  |  |  |  |  |  |  |  |  |  |  |  |  |  |  |  |  |  |  |  |  |  |  |  |  |  |  |  |  |  |  |  |  |  |  |  |  |  |  |  |  |  |  |  |  |  |  |  |  |  |  |  |  |  |  |  |  |  |  |  |  |  |  |  |  |  |  |  |  |  |  |  |  |  |  |  |  |  |  |  |  |  |  |  |  |  |  |  |  |  |  |  |  |  |  |  |  |  |  |  |  |  |  |  |  |  |  |  |  |  |  |  |  |  |  |  |  |  |  |  |  |  |  |  |  |  |  |  |  |  |  |  |  |  |  |  |  |  |  |  |  |  |  |  |  |  |  |  |  |  |  |  |  |  |  |  |  |  |  |  |  |  |  |  |  |  |  |  |  |  |  |  |  |  |  |  |  |  |  |  |  |  |  |  |  |  |  |  |  |  |  |  |  |  |  |  |  |  |  |  |  |  |  |  |  |  |  |  |  |  |  |  |  |  |  |  |  |  |  |  |  |  |  |  |  |  |  |  |  |  |  |  |  |  |  |  |  |  |  |  |  |  |  |  |  |  |  |  |  |  |  |  |  |  |  |  |  |  |  |  |  |  |  |  |  |  |  |  |  |  |  |  |  |  |  |  |  |  |  |  |  |  |  |  |  |  |  |  |  |  |  |  |  |  |  |  |  |  |  |  |  |  |  |  |  |  |  |  |  |  |  |  |  |  |  |  |  |  |  |  |  |  |  |  |  |  |  |  |  |  |  |  |  |  |  |  |  |  |  |  |  |  |  |  |  |  |  |  |  |  |  |  |  |  |  |  |  |  |  |  |  |  |  |  |  |  |  |  |  |  |  |  |  |  |  |  |  |  |  |  |  |  |  |  |  |  |  |  |  |  |  |  |  |  |  |  |  |  |  |  |  |  |  |  |  |  |  |  |  |  |  |  |  |  |  |  |  |  |  |  |  |  |  |  |  |  |  |  |  |  |  |  |  |  |  |  |  |  |  |  |  |  |  |  |  |  |  |  |  |  |  |  |  |  |  |  |  |  |  |  |  |  |  |  |  |  |  |  |  |  |  |  |  |  |  |  |  |  |  |  |  |  |  |  |  |  |  |  |  |  |  |  |  |  |  |  |  |  |  |  |  |  |  |  |  |  |  |  |  |  |  |  |  |  |  |  |  |  |  |  |  |  |  |  |  |  |  |  |  |  |  |  |  |  |  |  |  |  |  |  |  |  |  |  |  |  |  |  |  |  |  |  |  |  |  |  |  |  |  |  |  |  |  |  |  |  |  |  |  |  |  |  |  |  |  |  |  |  |  |  |  |  |  |  |  |  |  |  |  |  |  |  |  |  |  |  |  |  |  |  |  |  |  |  |  |  |  |  |  |  |  |  |  |  |  |  |  |  |  |  |  |  |  |  |  |  |  |  |  |  |  |  |  |  |  |  |  |  |  |  |  |  |  |  |  |  |  |  |  |  |  |  |  |  |  |  |  |  |  |  |  |  |  |  |  |  |  |  |  |  |  |  |  |  |  |  |  |  |  |  |  |  |  |  |  |  |  |  |  |  |  |  |  |  |  |  |  |  |  |  |  |  |  |  |  |  |  |  |  |  |  |  |  |  |  |  |  |  |  |  |  |  |  |  |  |  |  |  |  |  |  |  |  |  |  |  |  |  |  |  |  |  |  |  |  |  |  |  |  |  |  |  |  |  |  |  |  |  |  |  |  |  |  |  |  |  |  |  |  |  |  |  |  |  |  |  |  |  |  |  |  |  |  |  |  |  |  |  |  |  |  |  |  |  |  |  |  |  |  |  |  |  |  |  |  |  |  |  |  |  |  |  |  |  |  |  |  |  |  |  |  |  |  |  |  |  |  |  |  |  |  |  |  |  |  |  |  |  |  |  |  |  |  |  |  |  |  |  |  |  |  |  |  |  |  | </ |
|-----|--|--|--|--|--|--|--|--|--|--|--|--|--|--|--|--|--|--|--|--|--|--|--|--|--|--|--|--|--|--|--|--|--|--|--|--|--|--|--|--|--|--|--|--|--|--|--|--|--|--|--|--|--|--|--|--|--|--|--|--|--|--|--|--|--|--|--|--|--|--|--|--|--|--|--|--|--|--|--|--|--|--|--|--|--|--|--|--|--|--|--|--|--|--|--|--|--|--|--|--|--|--|--|--|--|--|--|--|--|--|--|--|--|--|--|--|--|--|--|--|--|--|--|--|--|--|--|--|--|--|--|--|--|--|--|--|--|--|--|--|--|--|--|--|--|--|--|--|--|--|--|--|--|--|--|--|--|--|--|--|--|--|--|--|--|--|--|--|--|--|--|--|--|--|--|--|--|--|--|--|--|--|--|--|--|--|--|--|--|--|--|--|--|--|--|--|--|--|--|--|--|--|--|--|--|--|--|--|--|--|--|--|--|--|--|--|--|--|--|--|--|--|--|--|--|--|--|--|--|--|--|--|--|--|--|--|--|--|--|--|--|--|--|--|--|--|--|--|--|--|--|--|--|--|--|--|--|--|--|--|--|--|--|--|--|--|--|--|--|--|--|--|--|--|--|--|--|--|--|--|--|--|--|--|--|--|--|--|--|--|--|--|--|--|--|--|--|--|--|--|--|--|--|--|--|--|--|--|--|--|--|--|--|--|--|--|--|--|--|--|--|--|--|--|--|--|--|--|--|--|--|--|--|--|--|--|--|--|--|--|--|--|--|--|--|--|--|--|--|--|--|--|--|--|--|--|--|--|--|--|--|--|--|--|--|--|--|--|--|--|--|--|--|--|--|--|--|--|--|--|--|--|--|--|--|--|--|--|--|--|--|--|--|--|--|--|--|--|--|--|--|--|--|--|--|--|--|--|--|--|--|--|--|--|--|--|--|--|--|--|--|--|--|--|--|--|--|--|--|--|--|--|--|--|--|--|--|--|--|--|--|--|--|--|--|--|--|--|--|--|--|--|--|--|--|--|--|--|--|--|--|--|--|--|--|--|--|--|--|--|--|--|--|--|--|--|--|--|--|--|--|--|--|--|--|--|--|--|--|--|--|--|--|--|--|--|--|--|--|--|--|--|--|--|--|--|--|--|--|--|--|--|--|--|--|--|--|--|--|--|--|--|--|--|--|--|--|--|--|--|--|--|--|--|--|--|--|--|--|--|--|--|--|--|--|--|--|--|--|--|--|--|--|--|--|--|--|--|--|--|--|--|--|--|--|--|--|--|--|--|--|--|--|--|--|--|--|--|--|--|--|--|--|--|--|--|--|--|--|--|--|--|--|--|--|--|--|--|--|--|--|--|--|--|--|--|--|--|--|--|--|--|--|--|--|--|--|--|--|--|--|--|--|--|--|--|--|--|--|--|--|--|--|--|--|--|--|--|--|--|--|--|--|--|--|--|--|--|--|--|--|--|--|--|--|--|--|--|--|--|--|--|--|--|--|--|--|--|--|--|--|--|--|--|--|--|--|--|--|--|--|--|--|--|--|--|--|--|--|--|--|--|--|--|--|--|--|--|--|--|--|--|--|--|--|--|--|--|--|--|--|--|--|--|--|--|--|--|--|--|--|--|--|--|--|--|--|--|--|--|--|--|--|--|--|--|--|--|--|--|--|--|--|--|--|--|--|--|--|--|--|--|--|--|--|--|--|--|--|--|--|--|--|--|--|--|--|--|--|--|--|--|--|--|--|--|--|--|--|--|--|--|--|--|--|--|--|--|--|--|--|--|--|--|--|--|--|--|--|--|--|--|--|--|--|--|--|--|--|--|--|--|--|--|--|--|--|--|--|--|--|--|--|--|--|--|--|--|--|--|--|--|--|--|--|--|--|--|--|--|--|--|--|--|--|--|--|--|--|--|--|--|--|--|--|--|--|--|--|--|--|--|--|--|--|--|--|--|--|--|--|--|--|--|--|--|--|--|--|--|--|--|--|--|--|--|--|--|--|--|--|--|--|--|--|--|--|--|--|--|--|--|--|--|--|--|--|--|--|--|--|--|--|--|--|--|--|--|--|--|--|--|--|--|--|--|--|--|--|--|--|--|--|--|--|--|--|--|--|--|--|--|--|--|--|--|--|--|--|--|--|--|--|--|--|--|--|--|--|--|--|--|--|--|--|--|--|--|--|--|--|--|--|--|--|--|--|--|--|--|--|--|--|--|--|--|--|--|--|--|--|--|--|--|--|--|--|--|--|--|--|--|--|--|--|--|--|--|--|--|--|--|--|--|--|--|--|--|--|--|--|--|--|--|--|--|--|--|--|--|--|--|--|--|--|--|--|--|--|--|--|--|--|--|--|--|--|--|--|--|--|--|--|--|--|--|--|--|--|--|--|--|--|--|--|--|--|--|--|--|--|--|--|--|--|--|--|--|--|--|--|--|--|--|--|--|--|--|--|--|--|--|--|--|--|--|--|--|--|--|--|--|--|--|--|--|--|--|--|--|--|--|--|--|--|--|--|--|--|--|--|--|--|--|--|--|--|--|--|--|--|--|--|--|--|--|--|--|--|--|--|--|--|--|--|--|--|--|--|--|--|--|--|--|--|--|--|--|--|--|--|--|--|--|--|--|--|--|--|--|--|--|--|--|--|--|--|--|--|--|--|--|--|--|--|--|--|--|--|--|--|--|--|--|--|--|--|--|--|--|--|--|--|--|--|--|--|--|--|--|--|--|--|--|--|--|--|--|--|--|--|--|--|--|--|--|--|--|--|--|--|--|--|--|--|--|--|--|--|--|--|--|--|--|--|--|--|--|--|--|--|--|--|--|--|--|--|--|--|--|--|--|--|--|--|--|--|--|--|--|--|--|--|--|--|--|--|--|--|--|--|--|--|--|--|--|--|--|--|--|--|--|--|--|--|--|--|--|--|--|--|--|--|--|--|--|--|--|--|--|--|--|--|--|--|--|--|--|--|--|--|--|--|--|--|--|--|--|--|--|--|--|--|--|--|--|--|--|--|--|--|--|--|--|--|--|--|--|--|--|--|--|--|--|--|--|--|--|--|--|--|--|--|--|--|--|--|--|--|--|--|--|--|--|--|--|--|--|--|--|--|----|

|                    |                |           |                          |                          |              |             |
|--------------------|----------------|-----------|--------------------------|--------------------------|--------------|-------------|
| SNP                | 48.20%         | 0         | hypothetical protein CDS | hypothetical protein     | None         | KLI700 43.1 |
| SNP (transversion) | 29.40%         | 8.60E-218 | hypothetical protein CDS | hypothetical protein     | None         | KLI700 43.1 |
| SNP (transition)   | 31.30%         | 0         | hypothetical protein CDS | hypothetical protein     | None         | KLI700 43.1 |
| SNP (transversion) | 58.70%         | 0         | SNP (transition)         | hypothetical protein CDS | Substitution | KLI700 43.1 |
| SNP (transversion) | 37.10%         | 0         | SNP (transversion)       | hypothetical protein CDS | None         | KLI700 43.1 |
| SNP (transversion) | 37.30%         | 0         | SNP (transversion)       | hypothetical protein CDS | None         | KLI700 43.1 |
| SNP (transversion) | 53.20%         | 0         | SNP (transversion)       | hypothetical protein CDS | Substitution | KLI700 43.1 |
| SNP (transversion) | 53.50%         | 0         | SNP (transversion)       | hypothetical protein CDS | None         | KLI700 43.1 |
| SNP (transversion) | 54.10%         | 0         | SNP (transversion)       | hypothetical protein CDS | Substitution | KLI700 43.1 |
| SNP (transition)   | 52.20%         | 0         | SNP (transition)         | hypothetical protein CDS | None         | KLI700 43.1 |
| SNP (transition)   | 58.00%         | 0         | SNP (transition)         | hypothetical protein CDS | None         | KLI700 43.1 |
| SNP (transition)   | 65.40%         | 0         | SNP (transition)         | hypothetical protein CDS | None         | KLI700 43.1 |
| SNP (transition)   | 71.50%         | 0         | SNP (transition)         | hypothetical protein CDS | None         | KLI700 43.1 |
| SNP (transition)   | 70.60%         | 0         | SNP (transition)         | hypothetical protein CDS | None         | KLI700 43.1 |
| SNP (transition)   | 67.50%         | 0         | SNP (transition)         | hypothetical protein CDS | None         | KLI700 43.1 |
| SNP (transition)   | 58.80%         | 0         | SNP (transition)         | hypothetical protein CDS | None         | KLI700 43.1 |
| SNP (transition)   | 57.20%         | 0         | SNP (transition)         | hypothetical protein CDS | Substitution | KLI700 43.1 |
| SNP (transversion) | 46.50%         | 5.0E-322  | SNP (transversion)       | hypothetical protein CDS | None         | KLI700 43.1 |
| CG -> AT           | 43.0% -> 43.9% | 2.30E-244 | Substitution             | hypothetical protein CDS | Substitution | KLI700 43.1 |
| SNP (transversion) | 41.20%         | 2.00E-167 | SNP (transversion)       | hypothetical protein CDS | Substitution | KLI700 43.1 |
| SNP (transition)   | 30.70%         | 2.60E-166 | SNP (transition)         | hypothetical protein CDS | None         | KLI700 43.1 |
| SNP (transition)   | 66.30%         | 0         | SNP (transition)         | hypothetical protein CDS | None         | KLI700 43.1 |
| SNP (transversion) | 47.20%         | 0         | SNP (transversion)       | hypothetical protein CDS | None         | KLI700 43.1 |
| GGT -> CGC         | 30.3% -> 31.3% | 0         | Substitution             | hypothetical protein CDS | Substitution | KLI700 43.1 |
| SNP (transition)   | 33.10%         | 0         | SNP (transition)         | hypothetical protein CDS | Substitution | KLI700 43.1 |
| SNP (transversion) | 57.10%         | 0         | SNP (transversion)       | hypothetical protein CDS | None         | KLI700 43.1 |
| SNP (transition)   | 45.50%         | 0         | SNP (transition)         | hypothetical protein CDS | None         | KLI700 43.1 |
| SNP (transition)   | 67.10%         | 0         | SNP (transition)         | hypothetical protein CDS | None         | KLI700 43.1 |
| SNP (transition)   | 42.50%         | 0         | SNP (transition)         | hypothetical protein CDS | None         | KLI700 43.1 |
| SNP (transition)   | 37.60%         | 0         | SNP (transition)         | hypothetical protein CDS | None         | KLI700 43.1 |
| SNP (transition)   | 32.90%         | 0         | SNP (transition)         | hypothetical protein CDS | None         | KLI700 43.1 |
| SNP (transversion) | 51.50%         | 0         | SNP (transversion)       | hypothetical protein CDS | None         | KLI700 43.1 |

|                    |          |           |                          |                      |             |             |
|--------------------|----------|-----------|--------------------------|----------------------|-------------|-------------|
| SNP                | 62.20%   | 0         | hypothetical protein CDS | hypothetical protein | None        | KLI700 43.1 |
| Substitution       | 29.7% -> | 0         | hypothetical protein CDS | hypothetical protein | None        | KLI700 43.1 |
| Substitution       | 30.7% -> | 0         | hypothetical protein CDS | hypothetical protein | Substituted | KLI700 43.1 |
| Substitution       | 30.8%    | 0         | hypothetical protein CDS | hypothetical protein | on          | KLI700 43.1 |
| SNP (transition)   | 31.50%   | 0         | hypothetical protein CDS | hypothetical protein | None        | KLI700 43.1 |
| SNP (transversion) | 57.70%   | 0         | hypothetical protein CDS | hypothetical protein | None        | KLI700 43.1 |
| SNP (transversion) | 36.50%   | 0         | hypothetical protein CDS | hypothetical protein | None        | KLI700 43.1 |
| SNP (transition)   | 36.20%   | 0         | hypothetical protein CDS | hypothetical protein | None        | KLI700 43.1 |
| SNP (transition)   | 39.50%   | 0         | hypothetical protein CDS | hypothetical protein | None        | KLI700 43.1 |
| SNP (transition)   | 30.00%   | 0         | hypothetical protein CDS | hypothetical protein | None        | KLI700 43.1 |
| SNP (transition)   | 38.50%   | 0         | hypothetical protein CDS | hypothetical protein | Substituted | KLI700 43.1 |
| SNP (transition)   | 29.00%   | 0         | hypothetical protein CDS | hypothetical protein | None        | KLI700 43.1 |
| SNP (transition)   | 25.50%   | 0         | hypothetical protein CDS | hypothetical protein | None        | KLI700 43.1 |
| SNP (transition)   | 32.40%   | 0         | hypothetical protein CDS | hypothetical protein | Substituted | KLI700 43.1 |
| SNP (transition)   | 42.50%   | 0         | hypothetical protein CDS | hypothetical protein | None        | KLI700 43.1 |
| SNP (transition)   | 29.70%   | 0         | hypothetical protein CDS | hypothetical protein | None        | KLI700 43.1 |
| SNP (transition)   | 28.10%   | 0         | hypothetical protein CDS | hypothetical protein | None        | KLI700 43.1 |
| SNP (transition)   | 70.40%   | 0         | hypothetical protein CDS | hypothetical protein | None        | KLI700 43.1 |
| SNP (transversion) | 28.80%   | 0         | hypothetical protein CDS | hypothetical protein | Substituted | KLI700 43.1 |
| SNP (transversion) | 30.20%   | 0         | hypothetical protein CDS | hypothetical protein | None        | KLI700 43.1 |
| SNP (transversion) | 33.40%   | 0         | hypothetical protein CDS | hypothetical protein | None        | KLI700 43.1 |
| SNP (transition)   | 26.90%   | 0         | hypothetical protein CDS | hypothetical protein | None        | KLI700 43.1 |
| SNP (transversion) | 75.30%   | 0         | hypothetical protein CDS | hypothetical protein | None        | KLI700 43.1 |
| SNP (transition)   | 58.40%   | 0         | hypothetical protein CDS | hypothetical protein | Substituted | KLI700 43.1 |
| SNP (transversion) | 58.00%   | 0         | hypothetical protein CDS | hypothetical protein | Substituted | KLI700 43.1 |
| SNP (transition)   | 73.70%   | 0         | hypothetical protein CDS | hypothetical protein | Substituted | KLI700 43.1 |
| SNP (transition)   | 64.00%   | 0         | hypothetical protein CDS | hypothetical protein | None        | KLI700 43.1 |
| GG ->              | 29.3% -> | 0         | hypothetical protein CDS | hypothetical protein | Substituted | KLI700 43.1 |
| Substitution       | 29.5%    | 0         | hypothetical protein CDS | hypothetical protein | on          | KLI700 43.1 |
| SNP (transition)   | 25.30%   | 3.80E-289 | hypothetical protein CDS | hypothetical protein | None        | KLI700 43.1 |
| SNP (transition)   | 46.30%   | 0         | hypothetical protein CDS | hypothetical protein | None        | KLI700 43.1 |
| SNP (transition)   | 79.00%   | 0         | hypothetical protein CDS | hypothetical protein | None        | KLI700 43.1 |
| SNP (transition)   | 79.40%   | 0         | hypothetical protein CDS | hypothetical protein | None        | KLI700 43.1 |
| SNP (transition)   | 27.90%   | 9.0E-316  | hypothetical protein CDS | hypothetical protein | None        | KLI700 43.1 |



|                                |    |      |      |   |        |         |                |          |           |          |  |              |              |            |        |
|--------------------------------|----|------|------|---|--------|---------|----------------|----------|-----------|----------|--|--------------|--------------|------------|--------|
| Variants:                      | GA |      |      |   | AAT -> | 984 ->  |                | 29.9% -> |           |          |  | hypothetical | hypothetical | Substituti | KLI700 |
| VaAphrodite_C_FDSW210055059-1r | C  | 941  | 943  | 2 | GAC    | 996     | Substitution   | 30.2%    | 0         | I -> V   |  | protein CDS  | protein      | on         | 43.1   |
| Variants:                      |    |      |      |   |        |         | SNP            |          |           |          |  | hypothetical | hypothetical | Substituti | KLI700 |
| VaAphrodite_C_FDSW210055059-1r | C  | 943  | 943  | 1 | T -> C | 984     | (transition)   | 53.20%   | 0         | I -> V   |  | protein CDS  | protein      | on         | 43.1   |
| Variants:                      |    |      |      |   |        |         | SNP            |          |           |          |  | hypothetical | hypothetical |            | KLI700 |
| VaAphrodite_C_FDSW210055059-1r | A  | 944  | 944  | 1 | C -> A | 986     | (transversion) | 54.90%   | 0         |          |  | protein CDS  | protein      | None       | 43.1   |
| Variants:                      |    |      |      |   |        |         | SNP            |          |           |          |  | hypothetical | hypothetical |            | KLI700 |
| VaAphrodite_C_FDSW210055059-1r | G  | 944  | 944  | 1 | C -> G | 986     | (transversion) | 28.30%   | 2.90E-254 |          |  | protein CDS  | protein      | None       | 43.1   |
| Variants:                      |    |      |      |   |        |         | SNP            |          |           |          |  | hypothetical | hypothetical |            | KLI700 |
| VaAphrodite_C_FDSW210055059-1r | G  | 947  | 947  | 1 | C -> G | 998     | (transversion) | 54.20%   | 0         |          |  | protein CDS  | protein      | None       | 43.1   |
| Variants:                      |    |      |      |   | CG ->  | 998 ->  |                | 28.5% -> |           |          |  | hypothetical | hypothetical | Substituti | KLI700 |
| VaAphrodite_C_FDSW210055059-1r | AT | 947  | 948  | 2 | AT     | 999     | Substitution   | 28.6%    | 1.50E-235 | T -> N   |  | protein CDS  | protein      | on         | 43.1   |
| Variants:                      |    |      |      |   |        |         | SNP            |          |           |          |  | hypothetical | hypothetical |            | KLI700 |
| VaAphrodite_C_FDSW210055059-1r | A  | 950  | 950  | 1 | G -> A | 1011    | (transition)   | 54.60%   | 0         |          |  | protein CDS  | protein      | None       | 43.1   |
| Variants:                      | CT |      |      |   | TGG -> | 1025 -> |                | 53.4% -> |           |          |  | hypothetical | hypothetical | Substituti | KLI700 |
| VaAphrodite_C_FDSW210055059-1r | T  | 955  | 957  | 3 | CTT    | 1028    | Substitution   | 53.7%    | 0         | TN -> KD |  | protein CDS  | protein      | on         | 43.1   |
| Variants:                      |    |      |      |   |        |         | SNP            |          |           |          |  | hypothetical | hypothetical |            | KLI700 |
| VaAphrodite_C_FDSW210055059-1r | T  | 959  | 959  | 1 | C -> T | 1035    | (transition)   | 53.10%   | 0         |          |  | protein CDS  | protein      | None       | 43.1   |
| Variants:                      |    |      |      |   |        |         | SNP            |          |           |          |  | hypothetical | hypothetical |            | KLI700 |
| VaAphrodite_C_FDSW210055059-1r | G  | 971  | 971  | 1 | A -> G | 1034    | (transition)   | 40.80%   | 0         |          |  | protein CDS  | protein      | None       | 43.1   |
| Variants:                      |    |      |      |   |        |         | SNP            |          |           |          |  | hypothetical | hypothetical |            | KLI700 |
| VaAphrodite_C_FDSW210055059-1r | C  | 977  | 977  | 1 | G -> C | 1049    | (transversion) | 48.00%   | 0         |          |  | protein CDS  | protein      | None       | 43.1   |
| Variants:                      |    |      |      |   |        |         | SNP            |          |           |          |  | hypothetical | hypothetical |            | KLI700 |
| VaAphrodite_C_FDSW210055059-1r | C  | 983  | 983  | 1 | T -> C | 1018    | (transition)   | 67.80%   | 0         |          |  | protein CDS  | protein      | None       | 43.1   |
| Variants:                      |    |      |      |   |        |         | SNP            |          |           |          |  | hypothetical | hypothetical |            | KLI700 |
| VaAphrodite_C_FDSW210055059-1r | C  | 986  | 986  | 1 | G -> C | 1022    | (transversion) | 66.90%   | 0         |          |  | protein CDS  | protein      | None       | 43.1   |
| Variants:                      |    |      |      |   |        |         | SNP            |          |           |          |  | hypothetical | hypothetical |            | KLI700 |
| VaAphrodite_C_FDSW210055059-1r | G  | 1025 | 1025 | 1 | C -> G | 1078    | (transversion) | 51.50%   | 0         |          |  | protein CDS  | protein      | None       | 43.1   |
| Variants:                      |    |      |      |   |        |         | SNP            |          |           |          |  | hypothetical | hypothetical |            | KLI700 |
| VaAphrodite_C_FDSW210055059-1r | T  | 1025 | 1025 | 1 | C -> T | 1078    | (transition)   | 25.10%   | 8.30E-284 |          |  | protein CDS  | protein      | None       | 43.1   |
| Variants:                      |    |      |      |   |        |         | SNP            |          |           |          |  | hypothetical | hypothetical |            | KLI700 |
| VaAphrodite_C_FDSW210055059-1r | G  | 1028 | 1028 | 1 | C -> G | 1078    | (transversion) | 34.00%   | 0         |          |  | protein CDS  | protein      | None       | 43.1   |
| Variants:                      |    |      |      |   |        |         | SNP            |          |           |          |  | hypothetical | hypothetical | Substituti | KLI700 |
| VaAphrodite_C_FDSW210055059-1r | T  | 1054 | 1054 | 1 | C -> T | 1165    | (transition)   | 58.70%   | 0         | A -> T   |  | protein CDS  | protein      | on         | 43.1   |
| Variants:                      |    |      |      |   |        |         | SNP            |          |           |          |  | hypothetical | hypothetical |            | KLI700 |
| VaAphrodite_C_FDSW210055059-1r | A  | 1055 | 1055 | 1 | C -> A | 1164    | (transversion) | 34.40%   | 0         |          |  | protein CDS  | protein      | None       | 43.1   |
| Variants:                      |    |      |      |   |        |         | SNP            |          |           |          |  | hypothetical | hypothetical |            | KLI700 |
| VaAphrodite_C_FDSW210055059-1r | G  | 1055 | 1055 | 1 | C -> G | 1164    | (transversion) | 36.30%   | 0         |          |  | protein CDS  | protein      | None       | 43.1   |
| Variants:                      |    |      |      |   |        |         | SNP            |          |           |          |  | hypothetical | hypothetical | Substituti | KLI700 |
| VaAphrodite_C_FDSW210055059-1r | A  | 1062 | 1062 | 1 | T -> A | 1173    | (transversion) | 53.70%   | 0         | Y -> F   |  | protein CDS  | protein      | on         | 43.1   |
| Variants:                      |    |      |      |   |        |         | SNP            |          |           |          |  | hypothetical | hypothetical |            | KLI700 |
| VaAres1_A_FDSW210055060-2r     | C  | 2    | 2    | 1 | A -> C | 559     | (transversion) | 63.70%   | 0         |          |  | protein CDS  | protein      | None       | 43.1   |
| Variants:                      |    |      |      |   |        |         | SNP            |          |           |          |  | hypothetical | hypothetical | Substituti | KLI700 |
| VaAres1_A_FDSW210055060-2r     | C  | 8    | 8    | 1 | G -> C | 545     | (transversion) | 62.40%   | 0         | D -> E   |  | protein CDS  | protein      | on         | 43.1   |
| Variants:                      |    |      |      |   |        |         | SNP            |          |           |          |  | hypothetical | hypothetical |            | KLI700 |
| VaAres1_A_FDSW210055060-2r     | A  | 47   | 47   | 1 | G -> A | 447     | (transition)   | 60.90%   | 0         |          |  | protein CDS  | protein      | None       | 43.1   |
| Variants:                      |    |      |      |   |        |         | SNP            |          |           |          |  | hypothetical | hypothetical |            | KLI700 |
| VaAres1_A_FDSW210055060-2r     | A  | 53   | 53   | 1 | G -> A | 426     | (transition)   | 63.40%   | 0         |          |  | protein CDS  | protein      | None       | 43.1   |
| Variants:                      |    |      |      |   |        |         | SNP            |          |           |          |  | hypothetical | hypothetical |            | KLI700 |
| VaAres1_A_FDSW210055060-2r     | A  | 56   | 56   | 1 | G -> A | 416     | (transition)   | 74.00%   | 0         |          |  | protein CDS  | protein      | None       | 43.1   |
| Variants:                      |    |      |      |   |        |         | SNP            |          |           |          |  | hypothetical | hypothetical |            | KLI700 |
| VaAres1_A_FDSW210055060-2r     | G  | 59   | 59   | 1 | A -> G | 403     | (transition)   | 78.20%   | 0         |          |  | protein CDS  | protein      | None       | 43.1   |
| Variants:                      |    |      |      |   |        |         | SNP            |          |           |          |  | hypothetical | hypothetical |            | KLI700 |
| VaAres1_A_FDSW210055060-2r     | G  | 62   | 62   | 1 | A -> G | 397     | (transition)   | 77.80%   | 0         |          |  | protein CDS  | protein      | None       | 43.1   |
| Variants:                      |    |      |      |   |        |         | SNP            |          |           |          |  | hypothetical | hypothetical |            | KLI700 |
| VaAres1_A_FDSW210055060-2r     | G  | 73   | 73   | 1 | A -> G | 361     | (transition)   | 75.90%   | 0         |          |  | protein CDS  | protein      | None       | 43.1   |
| Variants:                      |    |      |      |   |        |         | SNP            |          |           |          |  | hypothetical | hypothetical |            | KLI700 |
| VaAres1_A_FDSW210055060-2r     | G  | 101  | 101  | 1 | A -> G | 269     | (transition)   | 68.40%   | 8.0E-316  |          |  | protein CDS  | protein      | None       | 43.1   |
| Variants:                      |    |      |      |   | TC ->  | 231 ->  |                | 55.0% -> |           |          |  | hypothetical | hypothetical | Substituti | KLI700 |
| VaAres1_A_FDSW210055060-2r     | CG | 109  | 110  | 2 | CG     | 233     | Substitution   | 56.7%    | 2.80E-162 | AI -> AV |  | protein CDS  | protein      | on         | 43.1   |
| Variants:                      |    |      |      |   | CG ->  | 213 ->  |                | 50.2% -> |           |          |  | hypothetical | hypothetical | Substituti | KLI700 |
| VaAres1_A_FDSW210055060-2r     | AT | 113  | 114  | 2 | AT     | 218     | Substitution   | 51.4%    | 7.90E-112 | T -> N   |  | protein CDS  | protein      | on         | 43.1   |
| Variants:                      |    |      |      |   |        |         | SNP            |          |           |          |  | hypothetical | hypothetical |            | KLI700 |
| VaAres1_A_FDSW210055060-2r     | C  | 386  | 386  | 1 | T -> C | 238     | (transition)   | 48.70%   | 5.20E-209 |          |  | protein CDS  | protein      | None       | 43.1   |

|                               |                |           |        |                          |                      |              |        |
|-------------------------------|----------------|-----------|--------|--------------------------|----------------------|--------------|--------|
| SNP (transversion)            | 51.00%         | 2.30E-252 | N -> K | hypothetical protein CDS | hypothetical protein | Substitution | KLI700 |
| SNP (transition)              | 40.70%         | 4.10E-196 |        | hypothetical protein CDS | hypothetical protein | None         | KLI700 |
| SNP (transition)              | 66.70%         | 0         |        | hypothetical protein CDS | hypothetical protein | None         | KLI700 |
| SNP (transversion)            | 48.50%         | 0         |        | hypothetical protein CDS | hypothetical protein | None         | KLI700 |
| GGT -> CGC                    | 30.7% -> 31.8% | 1.10E-267 | T -> A | hypothetical protein CDS | hypothetical protein | Substitution | KLI700 |
| Substitution SNP (transition) | 37.80%         | 0         | T -> A | hypothetical protein CDS | hypothetical protein | Substitution | KLI700 |
| SNP (transversion)            | 58.00%         | 0         |        | hypothetical protein CDS | hypothetical protein | None         | KLI700 |
| SNP (transition)              | 35.60%         | 4.9E-324  |        | hypothetical protein CDS | hypothetical protein | None         | KLI700 |
| SNP (transition)              | 65.70%         | 0         |        | hypothetical protein CDS | hypothetical protein | None         | KLI700 |
| SNP (transition)              | 34.50%         | 0         |        | hypothetical protein CDS | hypothetical protein | None         | KLI700 |
| SNP (transition)              | 43.10%         | 0         |        | hypothetical protein CDS | hypothetical protein | None         | KLI700 |
| SNP (transition)              | 30.90%         | 0         |        | hypothetical protein CDS | hypothetical protein | None         | KLI700 |
| SNP (transition)              | 29.10%         | 0         |        | hypothetical protein CDS | hypothetical protein | None         | KLI700 |
| SNP (transversion)            | 53.10%         | 0         |        | hypothetical protein CDS | hypothetical protein | None         | KLI700 |
| SNP (transversion)            | 58.80%         | 0         |        | hypothetical protein CDS | hypothetical protein | None         | KLI700 |
| SNP (transition)              | 25.30%         | 0         |        | hypothetical protein CDS | hypothetical protein | None         | KLI700 |
| SNP (transition)              | 25.70%         | 0         |        | hypothetical protein CDS | hypothetical protein | None         | KLI700 |
| SNP (transversion)            | 48.00%         | 0         |        | hypothetical protein CDS | hypothetical protein | None         | KLI700 |
| SNP (transversion)            | 36.60%         | 0         |        | hypothetical protein CDS | hypothetical protein | None         | KLI700 |
| SNP (transition)              | 32.80%         | 0         |        | hypothetical protein CDS | hypothetical protein | None         | KLI700 |
| SNP (transition)              | 44.40%         | 0         |        | hypothetical protein CDS | hypothetical protein | None         | KLI700 |
| SNP (transition)              | 35.60%         | 0         |        | hypothetical protein CDS | hypothetical protein | None         | KLI700 |
| SNP (transition)              | 28.40%         | 0         |        | hypothetical protein CDS | hypothetical protein | None         | KLI700 |
| SNP (transition)              | 44.70%         | 0         | N -> D | hypothetical protein CDS | hypothetical protein | Substitution | KLI700 |
| SNP (transition)              | 27.40%         | 0         |        | hypothetical protein CDS | hypothetical protein | None         | KLI700 |
| SNP (transition)              | 32.10%         | 0         |        | hypothetical protein CDS | hypothetical protein | None         | KLI700 |
| SNP (transition)              | 30.90%         | 0         | S -> N | hypothetical protein CDS | hypothetical protein | Substitution | KLI700 |
| SNP (transition)              | 37.30%         | 0         |        | hypothetical protein CDS | hypothetical protein | None         | KLI700 |
| SNP (transition)              | 27.50%         | 0         |        | hypothetical protein CDS | hypothetical protein | None         | KLI700 |
| SNP (transition)              | 29.70%         | 0         |        | hypothetical protein CDS | hypothetical protein | None         | KLI700 |
| SNP (transition)              | 72.40%         | 0         |        | hypothetical protein CDS | hypothetical protein | None         | KLI700 |
| SNP (transversion)            | 27.30%         | 0         | A -> S | hypothetical protein CDS | hypothetical protein | Substitution | KLI700 |

|                    |                |                   |                          |                      |              |             |
|--------------------|----------------|-------------------|--------------------------|----------------------|--------------|-------------|
| SNP (transversion) | 27.80%         | 0                 | hypothetical protein CDS | hypothetical protein | None         | KLI700 43.1 |
| SNP (transversion) | 33.60%         | 0                 | hypothetical protein CDS | hypothetical protein | None         | KLI700 43.1 |
| SNP (transition)   | 28.20%         | 0                 | hypothetical protein CDS | hypothetical protein | None         | KLI700 43.1 |
| SNP (transversion) | 74.10%         | 0                 | hypothetical protein CDS | hypothetical protein | None         | KLI700 43.1 |
| SNP (transition)   | 60.30%         | 0 I -> V          | hypothetical protein CDS | hypothetical protein | Substitution | KLI700 43.1 |
| SNP (transversion) | 55.80%         | 0 T -> K          | hypothetical protein CDS | hypothetical protein | Substitution | KLI700 43.1 |
| SNP (transition)   | 74.50%         | 0 T -> A          | hypothetical protein CDS | hypothetical protein | Substitution | KLI700 43.1 |
| SNP (transition)   | 65.90%         | 0                 | hypothetical protein CDS | hypothetical protein | None         | KLI700 43.1 |
| Substitution       | 30.90%         | 6.8E-311 IQ -> IE | hypothetical protein CDS | hypothetical protein | Substitution | KLI700 43.1 |
| SNP (transition)   | 27.40%         | 3.10E-248         | hypothetical protein CDS | hypothetical protein | None         | KLI700 43.1 |
| SNP (transition)   | 43.10%         | 0                 | hypothetical protein CDS | hypothetical protein | None         | KLI700 43.1 |
| SNP (transition)   | 80.20%         | 0                 | hypothetical protein CDS | hypothetical protein | None         | KLI700 43.1 |
| SNP (transition)   | 27.80%         | 1.40E-221         | hypothetical protein CDS | hypothetical protein | None         | KLI700 43.1 |
| SNP (transition)   | 80.10%         | 0                 | hypothetical protein CDS | hypothetical protein | None         | KLI700 43.1 |
| SNP (transition)   | 32.50%         | 1.50E-296         | hypothetical protein CDS | hypothetical protein | None         | KLI700 43.1 |
| Substitution       | 28.5% -> 28.8% | 0 I -> V          | hypothetical protein CDS | hypothetical protein | Substitution | KLI700 43.1 |
| SNP (transition)   | 56.40%         | 0 I -> V          | hypothetical protein CDS | hypothetical protein | Substitution | KLI700 43.1 |
| SNP (transversion) | 57.60%         | 0                 | hypothetical protein CDS | hypothetical protein | None         | KLI700 43.1 |
| SNP (transversion) | 27.80%         | 5.50E-224         | hypothetical protein CDS | hypothetical protein | None         | KLI700 43.1 |
| SNP (transversion) | 57.10%         | 0                 | hypothetical protein CDS | hypothetical protein | None         | KLI700 43.1 |
| Substitution       | 28.0% -> 28.5% | 6.90E-210 T -> N  | hypothetical protein CDS | hypothetical protein | Substitution | KLI700 43.1 |
| SNP (transition)   | 56.80%         | 0                 | hypothetical protein CDS | hypothetical protein | None         | KLI700 43.1 |
| Substitution       | 54.9% -> 55.5% | 0 TN -> KD        | hypothetical protein CDS | hypothetical protein | Substitution | KLI700 43.1 |
| SNP (transition)   | 54.80%         | 0                 | hypothetical protein CDS | hypothetical protein | None         | KLI700 43.1 |
| SNP (transition)   | 40.50%         | 0                 | hypothetical protein CDS | hypothetical protein | None         | KLI700 43.1 |
| SNP (transversion) | 49.00%         | 0                 | hypothetical protein CDS | hypothetical protein | None         | KLI700 43.1 |
| SNP (transition)   | 68.80%         | 0                 | hypothetical protein CDS | hypothetical protein | None         | KLI700 43.1 |
| SNP (transversion) | 68.80%         | 0                 | hypothetical protein CDS | hypothetical protein | None         | KLI700 43.1 |
| SNP (transition)   | 28.30%         | 1.20E-250         | hypothetical protein CDS | hypothetical protein | None         | KLI700 43.1 |
| SNP (transversion) | 44.80%         | 0                 | hypothetical protein CDS | hypothetical protein | None         | KLI700 43.1 |
| SNP (transition)   | 30.60%         | 1.60E-283         | hypothetical protein CDS | hypothetical protein | None         | KLI700 43.1 |
| SNP (transversion) | 27.60%         | 3.70E-248         | hypothetical protein CDS | hypothetical protein | None         | KLI700 43.1 |

|                    |            |                |           |          |                          |                      |              |        |
|--------------------|------------|----------------|-----------|----------|--------------------------|----------------------|--------------|--------|
| SNP                | 763        | 26.30%         | 0         |          | hypothetical protein CDS | hypothetical protein | None         | KLI700 |
| SNP (transition)   | 763        | 26.30%         | 0         |          | hypothetical protein CDS | hypothetical protein | Substitution | KLI700 |
| SNP (transition)   | 798        | 64.20%         | 0         | A -> T   | hypothetical protein CDS | hypothetical protein | None         | KLI700 |
| SNP (transversion) | 797        | 36.00%         | 0         |          | hypothetical protein CDS | hypothetical protein | None         | KLI700 |
| SNP (transversion) | 797        | 40.90%         | 0         |          | hypothetical protein CDS | hypothetical protein | None         | KLI700 |
| SNP (transversion) | 814        | 57.10%         | 0         | Y -> F   | hypothetical protein CDS | hypothetical protein | Substitution | KLI700 |
| SNP (transversion) | 681        | 60.50%         | 0         |          | hypothetical protein CDS | hypothetical protein | None         | KLI700 |
| SNP (transversion) | 670        | 58.80%         | 0         | D -> E   | hypothetical protein CDS | hypothetical protein | Substitution | KLI700 |
| SNP (transition)   | 542        | 58.10%         | 0         |          | hypothetical protein CDS | hypothetical protein | None         | KLI700 |
| SNP (transition)   | 521        | 61.60%         | 0         |          | hypothetical protein CDS | hypothetical protein | None         | KLI700 |
| SNP (transition)   | 505        | 71.10%         | 0         |          | hypothetical protein CDS | hypothetical protein | None         | KLI700 |
| SNP (transition)   | 497        | 74.20%         | 0         |          | hypothetical protein CDS | hypothetical protein | None         | KLI700 |
| SNP (transition)   | 488        | 73.60%         | 0         |          | hypothetical protein CDS | hypothetical protein | None         | KLI700 |
| SNP (transition)   | 452        | 70.60%         | 0         |          | hypothetical protein CDS | hypothetical protein | None         | KLI700 |
| SNP (transition)   | 317        | 59.00%         | 0         |          | hypothetical protein CDS | hypothetical protein | None         | KLI700 |
| TC -> CG           | 289 -> 294 | 47.8% -> 48.6% | 1.70E-205 | AI -> AV | hypothetical protein CDS | hypothetical protein | Substitution | KLI700 |
| CG -> AT           | 259 -> 265 | 42.5% -> 43.8% | 2.30E-124 | T -> N   | hypothetical protein CDS | hypothetical protein | Substitution | KLI700 |
| SNP (transition)   | 306        | 43.10%         | 1.8E-320  |          | hypothetical protein CDS | hypothetical protein | None         | KLI700 |
| SNP (transition)   | 408        | 67.20%         | 0         |          | hypothetical protein CDS | hypothetical protein | None         | KLI700 |
| SNP (transversion) | 445        | 67.20%         | 0         | N -> K   | hypothetical protein CDS | hypothetical protein | Substitution | KLI700 |
| SNP (transition)   | 463        | 54.20%         | 0         |          | hypothetical protein CDS | hypothetical protein | None         | KLI700 |
| SNP (transition)   | 521        | 29.60%         | 0         |          | hypothetical protein CDS | hypothetical protein | None         | KLI700 |
| SNP (transition)   | 562        | 77.20%         | 0         |          | hypothetical protein CDS | hypothetical protein | None         | KLI700 |
| SNP (transversion) | 582        | 58.60%         | 0         |          | hypothetical protein CDS | hypothetical protein | None         | KLI700 |
| GGT -> CGC         | 608 -> 619 | 38.9% -> 39.6% | 0         | T -> A   | hypothetical protein CDS | hypothetical protein | Substitution | KLI700 |
| SNP (transition)   | 619        | 35.50%         | 0         | T -> A   | hypothetical protein CDS | hypothetical protein | Substitution | KLI700 |
| SNP (transversion) | 624        | 70.40%         | 0         |          | hypothetical protein CDS | hypothetical protein | None         | KLI700 |
| SNP (transition)   | 667        | 51.00%         | 0         |          | hypothetical protein CDS | hypothetical protein | None         | KLI700 |
| SNP (transition)   | 676        | 76.30%         | 0         |          | hypothetical protein CDS | hypothetical protein | None         | KLI700 |
| SNP (transition)   | 814        | 43.00%         | 0         |          | hypothetical protein CDS | hypothetical protein | None         | KLI700 |
| SNP (transition)   | 826        | 41.50%         | 0         |          | hypothetical protein CDS | hypothetical protein | None         | KLI700 |
| SNP (transition)   | 931        | 40.40%         | 0         |          | hypothetical protein CDS | hypothetical protein | None         | KLI700 |
| SNP (transversion) | 943        | 47.00%         | 0         |          | hypothetical protein CDS | hypothetical protein | None         | KLI700 |

|                    |                |           |                          |                      |              |             |
|--------------------|----------------|-----------|--------------------------|----------------------|--------------|-------------|
| SNP (transversion) | 58.00%         | 0         | hypothetical protein CDS | hypothetical protein | None         | KLI700 43.1 |
| SNP (transition)   | 29.30%         | 0         | hypothetical protein CDS | hypothetical protein | None         | KLI700 43.1 |
| SNP (transition)   | 25.00%         | 0         | hypothetical protein CDS | hypothetical protein | None         | KLI700 43.1 |
| SNP (transversion) | 54.40%         | 0         | hypothetical protein CDS | hypothetical protein | None         | KLI700 43.1 |
| SNP (transversion) | 37.80%         | 0         | hypothetical protein CDS | hypothetical protein | None         | KLI700 43.1 |
| SNP (transition)   | 34.10%         | 0         | hypothetical protein CDS | hypothetical protein | None         | KLI700 43.1 |
| SNP (transition)   | 43.70%         | 0         | hypothetical protein CDS | hypothetical protein | None         | KLI700 43.1 |
| SNP (transition)   | 34.10%         | 0         | hypothetical protein CDS | hypothetical protein | None         | KLI700 43.1 |
| SNP (transition)   | 28.30%         | 0         | hypothetical protein CDS | hypothetical protein | None         | KLI700 43.1 |
| SNP (transition)   | 44.30%         | 0         | hypothetical protein CDS | hypothetical protein | Substitution | KLI700 43.1 |
| SNP (transition)   | 26.50%         | 0         | hypothetical protein CDS | hypothetical protein | None         | KLI700 43.1 |
| SNP (transition)   | 35.70%         | 0         | hypothetical protein CDS | hypothetical protein | None         | KLI700 43.1 |
| SNP (transition)   | 28.90%         | 0         | hypothetical protein CDS | hypothetical protein | Substitution | KLI700 43.1 |
| SNP (transition)   | 37.20%         | 0         | hypothetical protein CDS | hypothetical protein | None         | KLI700 43.1 |
| SNP (transition)   | 27.50%         | 0         | hypothetical protein CDS | hypothetical protein | None         | KLI700 43.1 |
| SNP (transition)   | 29.10%         | 0         | hypothetical protein CDS | hypothetical protein | None         | KLI700 43.1 |
| SNP (transition)   | 72.20%         | 0         | hypothetical protein CDS | hypothetical protein | None         | KLI700 43.1 |
| SNP (transversion) | 40.30%         | 0         | hypothetical protein CDS | hypothetical protein | None         | KLI700 43.1 |
| SNP (transition)   | 35.00%         | 0         | hypothetical protein CDS | hypothetical protein | None         | KLI700 43.1 |
| SNP (transition)   | 30.00%         | 0         | hypothetical protein CDS | hypothetical protein | None         | KLI700 43.1 |
| SNP (transition)   | 29.60%         | 0         | hypothetical protein CDS | hypothetical protein | None         | KLI700 43.1 |
| SNP (transversion) | 72.40%         | 0         | hypothetical protein CDS | hypothetical protein | None         | KLI700 43.1 |
| SNP (transition)   | 59.60%         | 0         | hypothetical protein CDS | hypothetical protein | Substitution | KLI700 43.1 |
| SNP (transversion) | 58.00%         | 0         | hypothetical protein CDS | hypothetical protein | Substitution | KLI700 43.1 |
| SNP (transition)   | 74.00%         | 0         | hypothetical protein CDS | hypothetical protein | Substitution | KLI700 43.1 |
| SNP (transition)   | 65.70%         | 0         | hypothetical protein CDS | hypothetical protein | None         | KLI700 43.1 |
| Substitution       | 26.3% -> 26.4% | 3.40E-225 | hypothetical protein CDS | hypothetical protein | Substitution | KLI700 43.1 |
| SNP (transition)   | 48.40%         | 0         | hypothetical protein CDS | hypothetical protein | None         | KLI700 43.1 |
| SNP (transition)   | 78.40%         | 0         | hypothetical protein CDS | hypothetical protein | None         | KLI700 43.1 |
| SNP (transition)   | 25.60%         | 3.70E-191 | hypothetical protein CDS | hypothetical protein | None         | KLI700 43.1 |
| SNP (transition)   | 78.50%         | 0         | hypothetical protein CDS | hypothetical protein | None         | KLI700 43.1 |
| SNP (transition)   | 31.80%         | 1.60E-275 | hypothetical protein CDS | hypothetical protein | None         | KLI700 43.1 |

70

|                                       |    |     |     |   |            |              |                    |                |           |        |                          |                      |               |        |
|---------------------------------------|----|-----|-----|---|------------|--------------|--------------------|----------------|-----------|--------|--------------------------|----------------------|---------------|--------|
| Variables: VaAres1_C_FDSW210055062-1r | C  | 413 | 413 | 1 | T -> C     | 367          | SNP (transition)   | 49.00%         | 0         |        | hypothetical protein CDS | hypothetical protein | None          | KLI700 |
| Variables: VaAres1_C_FDSW210055062-1r | T  | 416 | 416 | 1 | A -> T     | 398          | SNP (transversion) | 31.70%         | 1.80E-297 |        | hypothetical protein CDS | hypothetical protein | None          | KLI700 |
| Variables: VaAres1_C_FDSW210055062-1r | CG |     |     |   | GGT -> CGC | 413 -> 422   |                    | 26.8% -> 27.4% |           |        | hypothetical protein CDS | hypothetical protein | Substituti on | KLI700 |
| Variables: VaAres1_C_FDSW210055062-1r | C  | 419 | 421 | 2 |            |              | Substitution       |                | 1.10E-256 | T -> A | hypothetical protein CDS | hypothetical protein |               | 43.1   |
| Variables: VaAres1_C_FDSW210055062-1r | T  | 422 | 422 | 1 | A -> T     | 441          | SNP (transversion) | 42.20%         | 0         |        | hypothetical protein CDS | hypothetical protein | None          | KLI700 |
| Variables: VaAres1_C_FDSW210055062-1r | T  | 425 | 425 | 1 | C -> T     | 483          | SNP (transition)   | 34.00%         | 0         |        | hypothetical protein CDS | hypothetical protein | None          | KLI700 |
| Variables: VaAres1_C_FDSW210055062-1r | G  | 428 | 428 | 1 | A -> G     | 504          | SNP (transition)   | 54.60%         | 0         |        | hypothetical protein CDS | hypothetical protein | None          | KLI700 |
| Variables: VaAres1_C_FDSW210055062-1r | C  | 452 | 452 | 1 | T -> C     | 704          | SNP (transition)   | 35.20%         | 0         |        | hypothetical protein CDS | hypothetical protein | None          | KLI700 |
| Variables: VaAres1_C_FDSW210055062-1r | A  | 455 | 455 | 1 | G -> A     | 728          | SNP (transition)   | 37.50%         | 0         |        | hypothetical protein CDS | hypothetical protein | None          | KLI700 |
| Variables: VaAres1_C_FDSW210055062-1r | G  | 473 | 473 | 1 | C -> G     | 891          | SNP (transversion) | 55.40%         | 0         |        | hypothetical protein CDS | hypothetical protein | None          | KLI700 |
| Variables: VaAres1_C_FDSW210055062-1r | G  | 479 | 479 | 1 | C -> G     | 944          | SNP (transversion) | 57.90%         | 0         |        | hypothetical protein CDS | hypothetical protein | None          | KLI700 |
| Variables: VaAres1_C_FDSW210055062-1r | TA |     |     |   | CAA -> TAG | 973 -> 999   |                    | 31.4% -> 32.3% | 0         |        | hypothetical protein CDS | hypothetical protein | None          | KLI700 |
| Variables: VaAres1_C_FDSW210055062-1r | GG | 482 | 484 | 2 | CGC -> GGT | 1009 -> 1028 | Substitution       | 32.3% -> 32.9% | 0         | A -> T | hypothetical protein CDS | hypothetical protein | Substituti on | KLI700 |
| Variables: VaAres1_C_FDSW210055062-1r | T  | 485 | 487 | 2 |            |              | Substitution       |                | 0         |        | hypothetical protein CDS | hypothetical protein |               | 43.1   |
| Variables: VaAres1_C_FDSW210055062-1r | A  | 497 | 497 | 1 | G -> A     | 1141         | SNP (transition)   | 33.60%         | 0         |        | hypothetical protein CDS | hypothetical protein | None          | KLI700 |
| Variables: VaAres1_C_FDSW210055062-1r | C  | 509 | 509 | 1 | G -> C     | 1256         | SNP (transversion) | 49.50%         | 0         |        | hypothetical protein CDS | hypothetical protein | None          | KLI700 |
| Variables: VaAres1_C_FDSW210055062-1r | G  | 530 | 530 | 1 | C -> G     | 1534         | SNP (transversion) | 31.90%         | 0         |        | hypothetical protein CDS | hypothetical protein | None          | KLI700 |
| Variables: VaAres1_C_FDSW210055062-1r | A  | 563 | 563 | 1 | G -> A     | 1747         | SNP (transition)   | 31.80%         | 0         |        | hypothetical protein CDS | hypothetical protein | None          | KLI700 |
| Variables: VaAres1_C_FDSW210055062-1r | A  | 608 | 608 | 1 | G -> A     | 1908         | SNP (transition)   | 45.20%         | 0         |        | hypothetical protein CDS | hypothetical protein | None          | KLI700 |
| Variables: VaAres1_C_FDSW210055062-1r | G  | 614 | 614 | 1 | A -> G     | 1907         | SNP (transition)   | 36.10%         | 0         |        | hypothetical protein CDS | hypothetical protein | None          | KLI700 |
| Variables: VaAres1_C_FDSW210055062-1r | T  | 623 | 623 | 1 | C -> T     | 1907         | SNP (transition)   | 27.90%         | 0         |        | hypothetical protein CDS | hypothetical protein | None          | KLI700 |
| Variables: VaAres1_C_FDSW210055062-1r | C  | 628 | 628 | 1 | T -> C     | 1912         | SNP (transition)   | 43.40%         | 0         | N -> D | hypothetical protein CDS | hypothetical protein | Substituti on | KLI700 |
| Variables: VaAres1_C_FDSW210055062-1r | A  | 644 | 644 | 1 | G -> A     | 1883         | SNP (transition)   | 27.00%         | 0         |        | hypothetical protein CDS | hypothetical protein | None          | KLI700 |
| Variables: VaAres1_C_FDSW210055062-1r | G  | 671 | 671 | 1 | A -> G     | 1781         | SNP (transition)   | 28.50%         | 0         |        | hypothetical protein CDS | hypothetical protein | None          | KLI700 |
| Variables: VaAres1_C_FDSW210055062-1r | T  | 675 | 675 | 1 | C -> T     | 1741         | SNP (transition)   | 30.30%         | 0         | S -> N | hypothetical protein CDS | hypothetical protein | Substituti on | KLI700 |
| Variables: VaAres1_C_FDSW210055062-1r | A  | 677 | 677 | 1 | G -> A     | 1692         | SNP (transition)   | 40.70%         | 0         |        | hypothetical protein CDS | hypothetical protein | None          | KLI700 |
| Variables: VaAres1_C_FDSW210055062-1r | A  | 722 | 722 | 1 | G -> A     | 1454         | SNP (transition)   | 28.80%         | 0         |        | hypothetical protein CDS | hypothetical protein | None          | KLI700 |
| Variables: VaAres1_C_FDSW210055062-1r | T  | 728 | 728 | 1 | C -> T     | 1397         | SNP (transition)   | 27.10%         | 0         |        | hypothetical protein CDS | hypothetical protein | None          | KLI700 |
| Variables: VaAres1_C_FDSW210055062-1r | A  | 737 | 737 | 1 | G -> A     | 1305         | SNP (transition)   | 71.00%         | 0         |        | hypothetical protein CDS | hypothetical protein | None          | KLI700 |
| Variables: VaAres1_C_FDSW210055062-1r | A  | 745 | 745 | 1 | C -> A     | 1238         | SNP (transversion) | 28.80%         | 0         | A -> S | hypothetical protein CDS | hypothetical protein | Substituti on | KLI700 |
| Variables: VaAres1_C_FDSW210055062-1r | C  | 752 | 752 | 1 | G -> C     | 1180         | SNP (transversion) | 29.50%         | 0         |        | hypothetical protein CDS | hypothetical protein | None          | KLI700 |
| Variables: VaAres1_C_FDSW210055062-1r | A  | 755 | 755 | 1 | C -> A     | 1156         | SNP (transversion) | 32.70%         | 0         |        | hypothetical protein CDS | hypothetical protein | None          | KLI700 |
| Variables: VaAres1_C_FDSW210055062-1r | A  | 767 | 767 | 1 | G -> A     | 1083         | SNP (transition)   | 25.60%         | 0         |        | hypothetical protein CDS | hypothetical protein | None          | KLI700 |
| Variables: VaAres1_C_FDSW210055062-1r | G  | 806 | 806 | 1 | C -> G     | 911          | SNP (transversion) | 75.50%         | 0         |        | hypothetical protein CDS | hypothetical protein | None          | KLI700 |

|                    |              |                |           |          |                          |                      |             |        |
|--------------------|--------------|----------------|-----------|----------|--------------------------|----------------------|-------------|--------|
| SNP (transition)   | 871          | 62.50%         | 0         | I -> V   | hypothetical protein CDS | hypothetical protein | Substituted | KLI700 |
| SNP (transversion) | 847          | 58.00%         | 0         | T -> K   | hypothetical protein CDS | hypothetical protein | Substituted | KLI700 |
| SNP (transition)   | 825          | 74.10%         | 0         | T -> A   | hypothetical protein CDS | hypothetical protein | Substituted | KLI700 |
| SNP (transition)   | 832          | 66.60%         | 0         |          | hypothetical protein CDS | hypothetical protein | None        | KLI700 |
| Substitution       | 831 -> 833   | 31.0% -> 31.2% | 0         | IQ -> IE | hypothetical protein CDS | hypothetical protein | Substituted | KLI700 |
| SNP (transition)   | 852          | 26.40%         | 1.70E-307 |          | hypothetical protein CDS | hypothetical protein | None        | KLI700 |
| SNP (transition)   | 869          | 47.40%         | 0         |          | hypothetical protein CDS | hypothetical protein | None        | KLI700 |
| SNP (transition)   | 874          | 81.20%         | 0         |          | hypothetical protein CDS | hypothetical protein | None        | KLI700 |
| SNP (transition)   | 886          | 28.30%         | 0         |          | hypothetical protein CDS | hypothetical protein | None        | KLI700 |
| SNP (transition)   | 883          | 81.50%         | 0         |          | hypothetical protein CDS | hypothetical protein | None        | KLI700 |
| SNP (transition)   | 939          | 32.80%         | 0         |          | hypothetical protein CDS | hypothetical protein | None        | KLI700 |
| Substitution       | 1031 -> 1033 | 26.6% -> 27.2% | 0         | I -> V   | hypothetical protein CDS | hypothetical protein | Substituted | KLI700 |
| SNP (transition)   | 1033         | 55.40%         | 0         | I -> V   | hypothetical protein CDS | hypothetical protein | Substituted | KLI700 |
| SNP (transversion) | 1036         | 50.10%         | 0         |          | hypothetical protein CDS | hypothetical protein | None        | KLI700 |
| SNP (transversion) | 1036         | 31.90%         | 0         |          | hypothetical protein CDS | hypothetical protein | None        | KLI700 |
| SNP (transversion) | 1046         | 49.90%         | 0         |          | hypothetical protein CDS | hypothetical protein | None        | KLI700 |
| Substitution       | 1046 -> 1054 | 32.1% -> 32.3% | 0         | T -> N   | hypothetical protein CDS | hypothetical protein | Substituted | KLI700 |
| SNP (transition)   | 1058         | 49.30%         | 0         |          | hypothetical protein CDS | hypothetical protein | None        | KLI700 |
| Substitution       | 1083 -> 1094 | 48.4% -> 48.5% | 0         | TN -> KD | hypothetical protein CDS | hypothetical protein | Substituted | KLI700 |
| SNP (transition)   | 1092         | 47.70%         | 0         |          | hypothetical protein CDS | hypothetical protein | None        | KLI700 |
| SNP (transition)   | 1093         | 38.00%         | 0         |          | hypothetical protein CDS | hypothetical protein | None        | KLI700 |
| SNP (transversion) | 1102         | 48.30%         | 0         |          | hypothetical protein CDS | hypothetical protein | None        | KLI700 |
| SNP (transition)   | 1104         | 66.00%         | 0         |          | hypothetical protein CDS | hypothetical protein | None        | KLI700 |
| SNP (transversion) | 1114         | 66.20%         | 0         |          | hypothetical protein CDS | hypothetical protein | None        | KLI700 |
| SNP (transition)   | 1144         | 25.20%         | 7.50E-274 |          | hypothetical protein CDS | hypothetical protein | None        | KLI700 |
| SNP (transversion) | 1141         | 47.00%         | 0         |          | hypothetical protein CDS | hypothetical protein | None        | KLI700 |
| SNP (transition)   | 1141         | 27.60%         | 2.3E-313  |          | hypothetical protein CDS | hypothetical protein | None        | KLI700 |
| SNP (transversion) | 1144         | 31.60%         | 0         |          | hypothetical protein CDS | hypothetical protein | None        | KLI700 |
| SNP (transition)   | 1248         | 54.50%         | 0         | A -> T   | hypothetical protein CDS | hypothetical protein | Substituted | KLI700 |
| SNP (transversion) | 1243         | 33.50%         | 0         |          | hypothetical protein CDS | hypothetical protein | None        | KLI700 |
| SNP (transversion) | 1243         | 36.40%         | 0         |          | hypothetical protein CDS | hypothetical protein | None        | KLI700 |
| SNP (transversion) | 1250         | 50.30%         | 0         | Y -> F   | hypothetical protein CDS | hypothetical protein | Substituted | KLI700 |



|                                                     |         |     |     |   |               |               |                       |                   |           |          |                             |                         |                  |                |
|-----------------------------------------------------|---------|-----|-----|---|---------------|---------------|-----------------------|-------------------|-----------|----------|-----------------------------|-------------------------|------------------|----------------|
| Variants:<br>VaphiVaphiSt2_B_A_FDSW2100550<br>54-2r | C       | 2   | 2   | 1 | A -> C        | 451           | SNP<br>(transversion) | 63.40%            | 0         |          | hypothetical<br>protein CDS | hypothetical<br>protein | None             | KLI700<br>43.1 |
| Variants:<br>VaphiVaphiSt2_B_A_FDSW2100550<br>54-2r | C       | 8   | 8   | 1 | G -> C        | 447           | SNP<br>(transversion) | 62.90%            | 0         | D -> E   | hypothetical<br>protein CDS | hypothetical<br>protein | Substituti<br>on | KLI700<br>43.1 |
| Variants:<br>VaphiVaphiSt2_B_A_FDSW2100550<br>54-2r | A       | 47  | 47  | 1 | G -> A        | 360           | SNP<br>(transition)   | 59.70%            | 0         |          | hypothetical<br>protein CDS | hypothetical<br>protein | None             | KLI700<br>43.1 |
| Variants:<br>VaphiVaphiSt2_B_A_FDSW2100550<br>54-2r | A       | 53  | 53  | 1 | G -> A        | 331           | SNP<br>(transition)   | 62.50%            | 0         |          | hypothetical<br>protein CDS | hypothetical<br>protein | None             | KLI700<br>43.1 |
| Variants:<br>VaphiVaphiSt2_B_A_FDSW2100550<br>54-2r | A       | 56  | 56  | 1 | G -> A        | 322           | SNP<br>(transition)   | 71.70%            | 0         |          | hypothetical<br>protein CDS | hypothetical<br>protein | None             | KLI700<br>43.1 |
| Variants:<br>VaphiVaphiSt2_B_A_FDSW2100550<br>54-2r | G       | 59  | 59  | 1 | A -> G        | 317           | SNP<br>(transition)   | 74.10%            | 0         |          | hypothetical<br>protein CDS | hypothetical<br>protein | None             | KLI700<br>43.1 |
| Variants:<br>VaphiVaphiSt2_B_A_FDSW2100550<br>54-2r | G       | 62  | 62  | 1 | A -> G        | 309           | SNP<br>(transition)   | 73.50%            | 0         |          | hypothetical<br>protein CDS | hypothetical<br>protein | None             | KLI700<br>43.1 |
| Variants:<br>VaphiVaphiSt2_B_A_FDSW2100550<br>54-2r | G       | 73  | 73  | 1 | A -> G        | 292           | SNP<br>(transition)   | 72.60%            | 0         |          | hypothetical<br>protein CDS | hypothetical<br>protein | None             | KLI700<br>43.1 |
| Variants:<br>VaphiVaphiSt2_B_A_FDSW2100550<br>54-2r | G       | 101 | 101 | 1 | A -> G        | 217           | SNP<br>(transition)   | 58.10%            | 2.40E-215 |          | hypothetical<br>protein CDS | hypothetical<br>protein | None             | KLI700<br>43.1 |
| Variants:<br>VaphiVaphiSt2_B_A_FDSW2100550<br>54-2r | CG      | 109 | 110 | 2 | TC -><br>CG   | 186 -><br>188 | Substitution          | 45.7% -><br>46.3% | 2.60E-108 | AI -> AV | hypothetical<br>protein CDS | hypothetical<br>protein | Substituti<br>on | KLI700<br>43.1 |
| Variants:<br>VaphiVaphiSt2_B_A_FDSW2100550<br>54-2r | AT      | 113 | 114 | 2 | CG -><br>AT   | 178 -><br>181 | Substitution          | 41.6% -><br>42.0% | 3.70E-76  | T -> N   | hypothetical<br>protein CDS | hypothetical<br>protein | Substituti<br>on | KLI700<br>43.1 |
| Variants:<br>VaphiVaphiSt2_B_A_FDSW2100550<br>54-2r | T       | 392 | 392 | 1 | G -> T        | 109           | SNP<br>(transversion) | 25.70%            | 9.30E-26  | N -> K   | hypothetical<br>protein CDS | hypothetical<br>protein | Substituti<br>on | KLI700<br>43.1 |
| Variants:<br>VaphiVaphiSt2_B_A_FDSW2100550<br>54-2r | C       | 413 | 413 | 1 | T -> C        | 184           | SNP<br>(transition)   | 59.80%            | 3.90E-278 |          | hypothetical<br>protein CDS | hypothetical<br>protein | None             | KLI700<br>43.1 |
| Variants:<br>VaphiVaphiSt2_B_A_FDSW2100550<br>54-2r | T       | 416 | 416 | 1 | A -> T        | 198           | SNP<br>(transversion) | 43.40%            | 9.50E-210 |          | hypothetical<br>protein CDS | hypothetical<br>protein | None             | KLI700<br>43.1 |
| Variants:<br>VaphiVaphiSt2_B_A_FDSW2100550<br>54-2r | CG<br>C | 419 | 421 | 2 | GGT -><br>CGC | 207 -><br>214 | Substitution          | 30.8% -><br>31.9% | 5.40E-168 | T -> A   | hypothetical<br>protein CDS | hypothetical<br>protein | Substituti<br>on | KLI700<br>43.1 |
| Variants:<br>VaphiVaphiSt2_B_A_FDSW2100550<br>54-2r | C       | 421 | 421 | 1 | T -> C        | 214           | SNP<br>(transition)   | 31.80%            | 2.70E-181 | T -> A   | hypothetical<br>protein CDS | hypothetical<br>protein | Substituti<br>on | KLI700<br>43.1 |
| Variants:<br>VaphiVaphiSt2_B_A_FDSW2100550<br>54-2r | T       | 422 | 422 | 1 | A -> T        | 220           | SNP<br>(transversion) | 51.80%            | 7.10E-278 |          | hypothetical<br>protein CDS | hypothetical<br>protein | None             | KLI700<br>43.1 |
| Variants:<br>VaphiVaphiSt2_B_A_FDSW2100550<br>54-2r | T       | 425 | 425 | 1 | C -> T        | 232           | SNP<br>(transition)   | 37.50%            | 8.90E-214 |          | hypothetical<br>protein CDS | hypothetical<br>protein | None             | KLI700<br>43.1 |
| Variants:<br>VaphiVaphiSt2_B_A_FDSW2100550<br>54-2r | G       | 428 | 428 | 1 | A -> G        | 250           | SNP<br>(transition)   | 62.00%            | 0         |          | hypothetical<br>protein CDS | hypothetical<br>protein | None             | KLI700<br>43.1 |
| Variants:<br>VaphiVaphiSt2_B_A_FDSW2100550<br>54-2r | C       | 452 | 452 | 1 | T -> C        | 345           | SNP<br>(transition)   | 40.60%            | 0         |          | hypothetical<br>protein CDS | hypothetical<br>protein | None             | KLI700<br>43.1 |
| Variants:<br>VaphiVaphiSt2_B_A_FDSW2100550<br>54-2r | A       | 455 | 455 | 1 | G -> A        | 356           | SNP<br>(transition)   | 37.90%            | 0         |          | hypothetical<br>protein CDS | hypothetical<br>protein | None             | KLI700<br>43.1 |
| Variants:<br>VaphiVaphiSt2_B_A_FDSW2100550<br>54-2r | G       | 473 | 473 | 1 | C -> G        | 445           | SNP<br>(transversion) | 59.10%            | 0         |          | hypothetical<br>protein CDS | hypothetical<br>protein | None             | KLI700<br>43.1 |

|                                                     |         |     |     |   |               |               |                       |                   |   |        |                             |                         |                  |                |
|-----------------------------------------------------|---------|-----|-----|---|---------------|---------------|-----------------------|-------------------|---|--------|-----------------------------|-------------------------|------------------|----------------|
| Variants:<br>VaphiVaphiSt2_B_A_FDSW2100550<br>54-2r | G       | 479 | 479 | 1 | C -> G        | 480           | SNP<br>(transversion) | 60.60%            | 0 |        | hypothetical<br>protein CDS | hypothetical<br>protein | None             | KLI700<br>43.1 |
| Variants:<br>VaphiVaphiSt2_B_A_FDSW2100550<br>54-2r | TA<br>G | 482 | 484 | 2 | CAA -><br>TAG | 500 -><br>510 | Substitution          | 34.3% -><br>35.0% | 0 |        | hypothetical<br>protein CDS | hypothetical<br>protein | None             | KLI700<br>43.1 |
| Variants:<br>VaphiVaphiSt2_B_A_FDSW2100550<br>54-2r | GG<br>T | 485 | 487 | 2 | CGC -><br>GGT | 521 -><br>529 | Substitution          | 34.4% -><br>34.9% | 0 | A -> T | hypothetical<br>protein CDS | hypothetical<br>protein | Substituti<br>on | KLI700<br>43.1 |
| Variants:<br>VaphiVaphiSt2_B_A_FDSW2100550<br>54-2r | A       | 497 | 497 | 1 | G -> A        | 590           | SNP<br>(transition)   | 35.60%            | 0 |        | hypothetical<br>protein CDS | hypothetical<br>protein | None             | KLI700<br>43.1 |
| Variants:<br>VaphiVaphiSt2_B_A_FDSW2100550<br>54-2r | C       | 509 | 509 | 1 | G -> C        | 660           | SNP<br>(transversion) | 51.20%            | 0 |        | hypothetical<br>protein CDS | hypothetical<br>protein | None             | KLI700<br>43.1 |
| Variants:<br>VaphiVaphiSt2_B_A_FDSW2100550<br>54-2r | G       | 530 | 530 | 1 | C -> G        | 773           | SNP<br>(transversion) | 31.00%            | 0 |        | hypothetical<br>protein CDS | hypothetical<br>protein | None             | KLI700<br>43.1 |
| Variants:<br>VaphiVaphiSt2_B_A_FDSW2100550<br>54-2r | A       | 563 | 563 | 1 | G -> A        | 891           | SNP<br>(transition)   | 30.30%            | 0 |        | hypothetical<br>protein CDS | hypothetical<br>protein | None             | KLI700<br>43.1 |
| Variants:<br>VaphiVaphiSt2_B_A_FDSW2100550<br>54-2r | A       | 608 | 608 | 1 | G -> A        | 1044          | SNP<br>(transition)   | 46.30%            | 0 |        | hypothetical<br>protein CDS | hypothetical<br>protein | None             | KLI700<br>43.1 |
| Variants:<br>VaphiVaphiSt2_B_A_FDSW2100550<br>54-2r | G       | 614 | 614 | 1 | A -> G        | 1063          | SNP<br>(transition)   | 36.10%            | 0 |        | hypothetical<br>protein CDS | hypothetical<br>protein | None             | KLI700<br>43.1 |
| Variants:<br>VaphiVaphiSt2_B_A_FDSW2100550<br>54-2r | T       | 623 | 623 | 1 | C -> T        | 1076          | SNP<br>(transition)   | 28.10%            | 0 |        | hypothetical<br>protein CDS | hypothetical<br>protein | None             | KLI700<br>43.1 |
| Variants:<br>VaphiVaphiSt2_B_A_FDSW2100550<br>54-2r | C       | 628 | 628 | 1 | T -> C        | 1076          | SNP<br>(transition)   | 44.20%            | 0 | N -> D | hypothetical<br>protein CDS | hypothetical<br>protein | Substituti<br>on | KLI700<br>43.1 |
| Variants:<br>VaphiVaphiSt2_B_A_FDSW2100550<br>54-2r | A       | 644 | 644 | 1 | G -> A        | 1051          | SNP<br>(transition)   | 27.60%            | 0 |        | hypothetical<br>protein CDS | hypothetical<br>protein | None             | KLI700<br>43.1 |
| Variants:<br>VaphiVaphiSt2_B_A_FDSW2100550<br>54-2r | G       | 671 | 671 | 1 | A -> G        | 1012          | SNP<br>(transition)   | 30.60%            | 0 |        | hypothetical<br>protein CDS | hypothetical<br>protein | None             | KLI700<br>43.1 |
| Variants:<br>VaphiVaphiSt2_B_A_FDSW2100550<br>54-2r | T       | 675 | 675 | 1 | C -> T        | 1000          | SNP<br>(transition)   | 30.10%            | 0 | S -> N | hypothetical<br>protein CDS | hypothetical<br>protein | Substituti<br>on | KLI700<br>43.1 |
| Variants:<br>VaphiVaphiSt2_B_A_FDSW2100550<br>54-2r | A       | 677 | 677 | 1 | G -> A        | 990           | SNP<br>(transition)   | 38.90%            | 0 |        | hypothetical<br>protein CDS | hypothetical<br>protein | None             | KLI700<br>43.1 |
| Variants:<br>VaphiVaphiSt2_B_A_FDSW2100550<br>54-2r | A       | 722 | 722 | 1 | G -> A        | 858           | SNP<br>(transition)   | 28.70%            | 0 |        | hypothetical<br>protein CDS | hypothetical<br>protein | None             | KLI700<br>43.1 |
| Variants:<br>VaphiVaphiSt2_B_A_FDSW2100550<br>54-2r | T       | 728 | 728 | 1 | C -> T        | 816           | SNP<br>(transition)   | 26.00%            | 0 |        | hypothetical<br>protein CDS | hypothetical<br>protein | None             | KLI700<br>43.1 |
| Variants:<br>VaphiVaphiSt2_B_A_FDSW2100550<br>54-2r | A       | 737 | 737 | 1 | G -> A        | 757           | SNP<br>(transition)   | 71.50%            | 0 |        | hypothetical<br>protein CDS | hypothetical<br>protein | None             | KLI700<br>43.1 |
| Variants:<br>VaphiVaphiSt2_B_A_FDSW2100550<br>54-2r | A       | 745 | 745 | 1 | C -> A        | 724           | SNP<br>(transversion) | 27.30%            | 0 | A -> S | hypothetical<br>protein CDS | hypothetical<br>protein | Substituti<br>on | KLI700<br>43.1 |
| Variants:<br>VaphiVaphiSt2_B_A_FDSW2100550<br>54-2r | C       | 752 | 752 | 1 | G -> C        | 706           | SNP<br>(transversion) | 28.00%            | 0 |        | hypothetical<br>protein CDS | hypothetical<br>protein | None             | KLI700<br>43.1 |
| Variants:<br>VaphiVaphiSt2_B_A_FDSW2100550<br>54-2r | A       | 755 | 755 | 1 | C -> A        | 688           | SNP<br>(transversion) | 35.00%            | 0 |        | hypothetical<br>protein CDS | hypothetical<br>protein | None             | KLI700<br>43.1 |
| Variants:<br>VaphiVaphiSt2_B_A_FDSW2100550<br>54-2r | A       | 767 | 767 | 1 | G -> A        | 633           | SNP<br>(transition)   | 25.30%            | 0 |        | hypothetical<br>protein CDS | hypothetical<br>protein | None             | KLI700<br>43.1 |

|                                                      |         |     |     |   |               |               |                       |                   |           |          |                             |                         |                  |                |
|------------------------------------------------------|---------|-----|-----|---|---------------|---------------|-----------------------|-------------------|-----------|----------|-----------------------------|-------------------------|------------------|----------------|
| Variables:<br>VaphiVaphiSt2_B_A_FDSW2100550<br>54-2r | G       | 776 | 776 | 1 | A -> G        | 588           | SNP<br>(transition)   | 27.40%            | 0         |          | hypothetical<br>protein CDS | hypothetical<br>protein | None             | KLI700<br>43.1 |
| Variables:<br>VaphiVaphiSt2_B_A_FDSW2100550<br>54-2r | A       | 779 | 779 | 1 | G -> A        | 582           | SNP<br>(transition)   | 26.80%            | 2.0E-323  |          | hypothetical<br>protein CDS | hypothetical<br>protein | None             | KLI700<br>43.1 |
| Variables:<br>VaphiVaphiSt2_B_A_FDSW2100550<br>54-2r | G       | 806 | 806 | 1 | C -> G        | 537           | SNP<br>(transversion) | 77.10%            | 0         |          | hypothetical<br>protein CDS | hypothetical<br>protein | None             | KLI700<br>43.1 |
| Variables:<br>VaphiVaphiSt2_B_A_FDSW2100550<br>54-2r | C       | 823 | 823 | 1 | T -> C        | 518           | SNP<br>(transition)   | 62.50%            | 0         | I -> V   | hypothetical<br>protein CDS | hypothetical<br>protein | Substituti<br>on | KLI700<br>43.1 |
| Variables:<br>VaphiVaphiSt2_B_A_FDSW2100550<br>54-2r | T       | 834 | 834 | 1 | G -> T        | 496           | SNP<br>(transversion) | 59.30%            | 0         | T -> K   | hypothetical<br>protein CDS | hypothetical<br>protein | Substituti<br>on | KLI700<br>43.1 |
| Variables:<br>VaphiVaphiSt2_B_A_FDSW2100550<br>54-2r | C       | 844 | 844 | 1 | T -> C        | 478           | SNP<br>(transition)   | 78.20%            | 0         | T -> A   | hypothetical<br>protein CDS | hypothetical<br>protein | Substituti<br>on | KLI700<br>43.1 |
| Variables:<br>VaphiVaphiSt2_B_A_FDSW2100550<br>54-2r | A       | 854 | 854 | 1 | G -> A        | 475           | SNP<br>(transition)   | 68.60%            | 0         |          | hypothetical<br>protein CDS | hypothetical<br>protein | None             | KLI700<br>43.1 |
| Variables:<br>VaphiVaphiSt2_B_A_FDSW2100550<br>54-2r | CA      | 865 | 866 | 2 | GG -><br>CA   | 470 -><br>473 | Substitution          | 32.3% -><br>32.6% | 2.90E-245 | IQ -> IE | hypothetical<br>protein CDS | hypothetical<br>protein | Substituti<br>on | KLI700<br>43.1 |
| Variables:<br>VaphiVaphiSt2_B_A_FDSW2100550<br>54-2r | A       | 874 | 874 | 1 | G -> A        | 472           | SNP<br>(transition)   | 29.00%            | 5.10E-208 |          | hypothetical<br>protein CDS | hypothetical<br>protein | None             | KLI700<br>43.1 |
| Variables:<br>VaphiVaphiSt2_B_A_FDSW2100550<br>54-2r | A       | 881 | 881 | 1 | G -> A        | 486           | SNP<br>(transition)   | 45.70%            | 0         |          | hypothetical<br>protein CDS | hypothetical<br>protein | None             | KLI700<br>43.1 |
| Variables:<br>VaphiVaphiSt2_B_A_FDSW2100550<br>54-2r | A       | 887 | 887 | 1 | G -> A        | 493           | SNP<br>(transition)   | 81.10%            | 0         |          | hypothetical<br>protein CDS | hypothetical<br>protein | None             | KLI700<br>43.1 |
| Variables:<br>VaphiVaphiSt2_B_A_FDSW2100550<br>54-2r | A       | 890 | 890 | 1 | G -> A        | 492           | SNP<br>(transition)   | 27.00%            | 5.90E-158 |          | hypothetical<br>protein CDS | hypothetical<br>protein | None             | KLI700<br>43.1 |
| Variables:<br>VaphiVaphiSt2_B_A_FDSW2100550<br>54-2r | G       | 896 | 896 | 1 | A -> G        | 489           | SNP<br>(transition)   | 82.60%            | 0         |          | hypothetical<br>protein CDS | hypothetical<br>protein | None             | KLI700<br>43.1 |
| Variables:<br>VaphiVaphiSt2_B_A_FDSW2100550<br>54-2r | G       | 908 | 908 | 1 | A -> G        | 504           | SNP<br>(transition)   | 34.50%            | 8.50E-245 |          | hypothetical<br>protein CDS | hypothetical<br>protein | None             | KLI700<br>43.1 |
| Variables:<br>VaphiVaphiSt2_B_A_FDSW2100550<br>54-2r | GA<br>C | 941 | 943 | 2 | AAT -><br>GAC | 542           | Substitution          | 28.00%            | 2.10E-291 | I -> V   | hypothetical<br>protein CDS | hypothetical<br>protein | Substituti<br>on | KLI700<br>43.1 |
| Variables:<br>VaphiVaphiSt2_B_A_FDSW2100550<br>54-2r | C       | 943 | 943 | 1 | T -> C        | 542           | SNP<br>(transition)   | 55.20%            | 0         | I -> V   | hypothetical<br>protein CDS | hypothetical<br>protein | Substituti<br>on | KLI700<br>43.1 |
| Variables:<br>VaphiVaphiSt2_B_A_FDSW2100550<br>54-2r | A       | 944 | 944 | 1 | C -> A        | 546           | SNP<br>(transversion) | 51.80%            | 0         |          | hypothetical<br>protein CDS | hypothetical<br>protein | None             | KLI700<br>43.1 |
| Variables:<br>VaphiVaphiSt2_B_A_FDSW2100550<br>54-2r | G       | 944 | 944 | 1 | C -> G        | 546           | SNP<br>(transversion) | 31.90%            | 2.20E-186 |          | hypothetical<br>protein CDS | hypothetical<br>protein | None             | KLI700<br>43.1 |
| Variables:<br>VaphiVaphiSt2_B_A_FDSW2100550<br>54-2r | G       | 947 | 947 | 1 | C -> G        | 551           | SNP<br>(transversion) | 51.70%            | 0         |          | hypothetical<br>protein CDS | hypothetical<br>protein | None             | KLI700<br>43.1 |
| Variables:<br>VaphiVaphiSt2_B_A_FDSW2100550<br>54-2r | AT      | 947 | 948 | 2 | CG -><br>AT   | 546 -><br>551 | Substitution          | 31.8% -><br>32.1% | 1.20E-170 | T -> N   | hypothetical<br>protein CDS | hypothetical<br>protein | Substituti<br>on | KLI700<br>43.1 |
| Variables:<br>VaphiVaphiSt2_B_A_FDSW2100550<br>54-2r | A       | 950 | 950 | 1 | G -> A        | 546           | SNP<br>(transition)   | 50.40%            | 0         |          | hypothetical<br>protein CDS | hypothetical<br>protein | None             | KLI700<br>43.1 |
| Variables:<br>VaphiVaphiSt2_B_A_FDSW2100550<br>54-2r | CT<br>T | 955 | 957 | 3 | TGG -><br>CTT | 558 -><br>562 | Substitution          | 49.5% -><br>50.2% | 0         | TN -> KD | hypothetical<br>protein CDS | hypothetical<br>protein | Substituti<br>on | KLI700<br>43.1 |

|                                                      |    |      |      |   |             |               |                       |                   |           |        |                             |                         |                  |                |
|------------------------------------------------------|----|------|------|---|-------------|---------------|-----------------------|-------------------|-----------|--------|-----------------------------|-------------------------|------------------|----------------|
| Variables:<br>VaphiVaphiSt2_B_A_FDSW2100550<br>54-2r | T  | 959  | 959  | 1 | C -> T      | 559           | SNP<br>(transition)   | 49.60%            | 0         |        | hypothetical<br>protein CDS | hypothetical<br>protein | None             | KLI700<br>43.1 |
| Variables:<br>VaphiVaphiSt2_B_A_FDSW2100550<br>54-2r | G  | 971  | 971  | 1 | A -> G      | 557           | SNP<br>(transition)   | 38.60%            | 0         |        | hypothetical<br>protein CDS | hypothetical<br>protein | None             | KLI700<br>43.1 |
| Variables:<br>VaphiVaphiSt2_B_A_FDSW2100550<br>54-2r | G  | 974  | 974  | 1 | A -> G      | 551           | SNP<br>(transition)   | 25.20%            | 2.50E-133 |        | hypothetical<br>protein CDS | hypothetical<br>protein | None             | KLI700<br>43.1 |
| Variables:<br>VaphiVaphiSt2_B_A_FDSW2100550<br>54-2r | C  | 977  | 977  | 1 | G -> C      | 553           | SNP<br>(transversion) | 50.30%            | 0         |        | hypothetical<br>protein CDS | hypothetical<br>protein | None             | KLI700<br>43.1 |
| Variables:<br>VaphiVaphiSt2_B_A_FDSW2100550<br>54-2r | C  | 983  | 983  | 1 | T -> C      | 545           | SNP<br>(transition)   | 69.90%            | 0         |        | hypothetical<br>protein CDS | hypothetical<br>protein | None             | KLI700<br>43.1 |
| Variables:<br>VaphiVaphiSt2_B_A_FDSW2100550<br>54-2r | C  | 986  | 986  | 1 | G -> C      | 544           | SNP<br>(transversion) | 69.90%            | 0         |        | hypothetical<br>protein CDS | hypothetical<br>protein | None             | KLI700<br>43.1 |
| Variables:<br>VaphiVaphiSt2_B_A_FDSW2100550<br>54-2r | T  | 1013 | 1013 | 1 | C -> T      | 587           | SNP<br>(transition)   | 25.60%            | 3.70E-159 |        | hypothetical<br>protein CDS | hypothetical<br>protein | None             | KLI700<br>43.1 |
| Variables:<br>VaphiVaphiSt2_B_A_FDSW2100550<br>54-2r | G  | 1025 | 1025 | 1 | C -> G      | 610           | SNP<br>(transversion) | 48.20%            | 0         |        | hypothetical<br>protein CDS | hypothetical<br>protein | None             | KLI700<br>43.1 |
| Variables:<br>VaphiVaphiSt2_B_A_FDSW2100550<br>54-2r | T  | 1025 | 1025 | 1 | C -> T      | 610           | SNP<br>(transition)   | 29.00%            | 8.30E-216 |        | hypothetical<br>protein CDS | hypothetical<br>protein | None             | KLI700<br>43.1 |
| Variables:<br>VaphiVaphiSt2_B_A_FDSW2100550<br>54-2r | G  | 1028 | 1028 | 1 | C -> G      | 612           | SNP<br>(transversion) | 34.30%            | 2.30E-294 |        | hypothetical<br>protein CDS | hypothetical<br>protein | None             | KLI700<br>43.1 |
| Variables:<br>VaphiVaphiSt2_B_A_FDSW2100550<br>54-2r | T  | 1054 | 1054 | 1 | C -> T      | 645           | SNP<br>(transition)   | 62.30%            | 0         | A -> T | hypothetical<br>protein CDS | hypothetical<br>protein | Substituti<br>on | KLI700<br>43.1 |
| Variables:<br>VaphiVaphiSt2_B_A_FDSW2100550<br>54-2r | A  | 1055 | 1055 | 1 | C -> A      | 644           | SNP<br>(transversion) | 29.80%            | 0         |        | hypothetical<br>protein CDS | hypothetical<br>protein | None             | KLI700<br>43.1 |
| Variables:<br>VaphiVaphiSt2_B_A_FDSW2100550<br>54-2r | G  | 1055 | 1055 | 1 | C -> G      | 644           | SNP<br>(transversion) | 43.20%            | 0         |        | hypothetical<br>protein CDS | hypothetical<br>protein | None             | KLI700<br>43.1 |
| Variables:<br>VaphiVaphiSt2_B_A_FDSW2100550<br>54-2r | A  | 1062 | 1062 | 1 | T -> A      | 643           | SNP<br>(transversion) | 57.20%            | 0         | Y -> F | hypothetical<br>protein CDS | hypothetical<br>protein | Substituti<br>on | KLI700<br>43.1 |
| Variables:<br>VaphiSt2_B_FDSW210055056-1r            | C  | 2    | 2    | 1 | A -> C      | 1058          | SNP<br>(transversion) | 57.20%            | 0         |        | hypothetical<br>protein CDS | hypothetical<br>protein | None             | KLI700<br>43.1 |
| Variables:<br>VaphiSt2_B_FDSW210055056-1r            | C  | 8    | 8    | 1 | G -> C      | 1046          | SNP<br>(transversion) | 56.40%            | 0         | D -> E | hypothetical<br>protein CDS | hypothetical<br>protein | Substituti<br>on | KLI700<br>43.1 |
| Variables:<br>VaphiSt2_B_FDSW210055056-1r            | A  | 47   | 47   | 1 | G -> A      | 850           | SNP<br>(transition)   | 52.60%            | 0         |        | hypothetical<br>protein CDS | hypothetical<br>protein | None             | KLI700<br>43.1 |
| Variables:<br>VaphiSt2_B_FDSW210055056-1r            | A  | 53   | 53   | 1 | G -> A      | 822           | SNP<br>(transition)   | 58.30%            | 0         |        | hypothetical<br>protein CDS | hypothetical<br>protein | None             | KLI700<br>43.1 |
| Variables:<br>VaphiSt2_B_FDSW210055056-1r            | A  | 56   | 56   | 1 | G -> A      | 811           | SNP<br>(transition)   | 65.60%            | 0         |        | hypothetical<br>protein CDS | hypothetical<br>protein | None             | KLI700<br>43.1 |
| Variables:<br>VaphiSt2_B_FDSW210055056-1r            | G  | 59   | 59   | 1 | A -> G      | 790           | SNP<br>(transition)   | 71.40%            | 0         |        | hypothetical<br>protein CDS | hypothetical<br>protein | None             | KLI700<br>43.1 |
| Variables:<br>VaphiSt2_B_FDSW210055056-1r            | G  | 62   | 62   | 1 | A -> G      | 773           | SNP<br>(transition)   | 71.40%            | 0         |        | hypothetical<br>protein CDS | hypothetical<br>protein | None             | KLI700<br>43.1 |
| Variables:<br>VaphiSt2_B_FDSW210055056-1r            | G  | 73   | 73   | 1 | A -> G      | 713           | SNP<br>(transition)   | 68.20%            | 0         |        | hypothetical<br>protein CDS | hypothetical<br>protein | None             | KLI700<br>43.1 |
| Variables:<br>VaphiSt2_B_FDSW210055056-1r            | G  | 101  | 101  | 1 | A -> G      | 521           | SNP<br>(transition)   | 59.70%            | 0         |        | hypothetical<br>protein CDS | hypothetical<br>protein | None             | KLI700<br>43.1 |
| Variables:<br>VaphiSt2_B_FDSW210055056-1r            | C  | 109  | 109  | 1 | T -> C      | 477           | SNP<br>(transition)   | 56.80%            | 0         | I -> V | hypothetical<br>protein CDS | hypothetical<br>protein | Substituti<br>on | KLI700<br>43.1 |
| Variables:<br>VaphiSt2_B_FDSW210055056-1r            | G  | 110  | 110  | 1 | C -> G      | 464           | SNP<br>(transversion) | 44.60%            | 9.4E-320  |        | hypothetical<br>protein CDS | hypothetical<br>protein | None             | KLI700<br>43.1 |
| Variables:<br>VaphiSt2_B_FDSW210055056-1r            | AT | 113  | 114  | 2 | CG -><br>AT | 446 -><br>450 | Substitution          | 42.6% -><br>42.9% | 7.20E-255 | T -> N | hypothetical<br>protein CDS | hypothetical<br>protein | Substituti<br>on | KLI700<br>43.1 |

|                    |                |           |                          |                      |             |             |
|--------------------|----------------|-----------|--------------------------|----------------------|-------------|-------------|
| SNP (transition)   | 41.60%         | 1.50E-282 | hypothetical protein CDS | hypothetical protein | None        | KLI700 43.1 |
| SNP (transversion) | 44.00%         | 0         | hypothetical protein CDS | hypothetical protein | Substituted | KLI700 43.1 |
| SNP (transition)   | 46.00%         | 0         | hypothetical protein CDS | hypothetical protein | None        | KLI700 43.1 |
| SNP (transition)   | 27.50%         | 0.00E+00  | hypothetical protein CDS | hypothetical protein | None        | KLI700 43.1 |
| SNP (transition)   | 69.00%         | 0         | hypothetical protein CDS | hypothetical protein | None        | KLI700 43.1 |
| SNP (transversion) | 55.30%         | 0         | hypothetical protein CDS | hypothetical protein | None        | KLI700 43.1 |
| Substitution       | 31.1% -> 32.0% | 0         | hypothetical protein CDS | hypothetical protein | Substituted | KLI700 43.1 |
| SNP (transition)   | 31.00%         | 0         | hypothetical protein CDS | hypothetical protein | Substituted | KLI700 43.1 |
| SNP (transversion) | 58.30%         | 0         | hypothetical protein CDS | hypothetical protein | None        | KLI700 43.1 |
| SNP (transition)   | 38.00%         | 0         | hypothetical protein CDS | hypothetical protein | None        | KLI700 43.1 |
| SNP (transition)   | 67.20%         | 0         | hypothetical protein CDS | hypothetical protein | None        | KLI700 43.1 |
| SNP (transition)   | 42.20%         | 0         | hypothetical protein CDS | hypothetical protein | None        | KLI700 43.1 |
| SNP (transition)   | 38.60%         | 0         | hypothetical protein CDS | hypothetical protein | None        | KLI700 43.1 |
| SNP (transition)   | 25.40%         | 0         | hypothetical protein CDS | hypothetical protein | None        | KLI700 43.1 |
| SNP (transition)   | 26.00%         | 0         | hypothetical protein CDS | hypothetical protein | None        | KLI700 43.1 |
| SNP (transversion) | 58.30%         | 0         | hypothetical protein CDS | hypothetical protein | None        | KLI700 43.1 |
| SNP (transversion) | 64.80%         | 0         | hypothetical protein CDS | hypothetical protein | None        | KLI700 43.1 |
| Substitution       | 33.4% -> 33.7% | 0         | hypothetical protein CDS | hypothetical protein | None        | KLI700 43.1 |
| Substitution       | 33.2% -> 34.0% | 0         | hypothetical protein CDS | hypothetical protein | Substituted | KLI700 43.1 |
| SNP (transition)   | 33.00%         | 0         | hypothetical protein CDS | hypothetical protein | None        | KLI700 43.1 |
| SNP (transversion) | 53.20%         | 0         | hypothetical protein CDS | hypothetical protein | None        | KLI700 43.1 |
| SNP (transversion) | 35.60%         | 0         | hypothetical protein CDS | hypothetical protein | None        | KLI700 43.1 |
| SNP (transition)   | 36.20%         | 0         | hypothetical protein CDS | hypothetical protein | None        | KLI700 43.1 |
| Substitution       | 25.00%         | 0         | hypothetical protein CDS | hypothetical protein | Substituted | KLI700 43.1 |
| SNP (transition)   | 43.80%         | 0         | hypothetical protein CDS | hypothetical protein | None        | KLI700 43.1 |
| SNP (transition)   | 35.60%         | 0         | hypothetical protein CDS | hypothetical protein | None        | KLI700 43.1 |
| SNP (transition)   | 28.00%         | 0         | hypothetical protein CDS | hypothetical protein | None        | KLI700 43.1 |
| SNP (transition)   | 44.00%         | 0         | hypothetical protein CDS | hypothetical protein | Substituted | KLI700 43.1 |
| SNP (transition)   | 26.20%         | 0         | hypothetical protein CDS | hypothetical protein | None        | KLI700 43.1 |
| SNP (transition)   | 30.30%         | 0         | hypothetical protein CDS | hypothetical protein | None        | KLI700 43.1 |
| SNP (transition)   | 30.20%         | 0         | hypothetical protein CDS | hypothetical protein | Substituted | KLI700 43.1 |
| SNP (transition)   | 39.60%         | 0         | hypothetical protein CDS | hypothetical protein | None        | KLI700 43.1 |

|            |              |                |   |          |                          |                      |              |             |
|------------|--------------|----------------|---|----------|--------------------------|----------------------|--------------|-------------|
| SNP        | 1844         | 29.00%         | 0 |          | hypothetical protein CDS | hypothetical protein | None         | KLI700 43.1 |
| SNP        | 1788         | 25.40%         | 0 |          | hypothetical protein CDS | hypothetical protein | None         | KLI700 43.1 |
| SNP        | 1695         | 71.50%         | 0 |          | hypothetical protein CDS | hypothetical protein | None         | KLI700 43.1 |
| SNP        | 1608         | 27.90%         | 0 | A -> S   | hypothetical protein CDS | hypothetical protein | Substitution | KLI700 43.1 |
| SNP        | 1555         | 27.70%         | 0 |          | hypothetical protein CDS | hypothetical protein | None         | KLI700 43.1 |
| SNP        | 1518         | 34.80%         | 0 |          | hypothetical protein CDS | hypothetical protein | None         | KLI700 43.1 |
| SNP        | 1343         | 27.30%         | 0 |          | hypothetical protein CDS | hypothetical protein | None         | KLI700 43.1 |
| SNP        | 1121         | 77.40%         | 0 |          | hypothetical protein CDS | hypothetical protein | None         | KLI700 43.1 |
| SNP        | 1089         | 62.50%         | 0 | I -> V   | hypothetical protein CDS | hypothetical protein | Substitution | KLI700 43.1 |
| SNP        | 1097         | 58.80%         | 0 | T -> K   | hypothetical protein CDS | hypothetical protein | Substitution | KLI700 43.1 |
| SNP        | 1041         | 77.20%         | 0 | T -> A   | hypothetical protein CDS | hypothetical protein | Substitution | KLI700 43.1 |
| SNP        | 1051         | 67.60%         | 0 |          | hypothetical protein CDS | hypothetical protein | None         | KLI700 43.1 |
| GG -> CA   | 1076 -> 1082 | 32.7% -> 33.0% | 0 | IQ -> IE | hypothetical protein CDS | hypothetical protein | Substitution | KLI700 43.1 |
| SNP        | 1098         | 27.00%         | 0 |          | hypothetical protein CDS | hypothetical protein | None         | KLI700 43.1 |
| SNP        | 1099         | 50.40%         | 0 |          | hypothetical protein CDS | hypothetical protein | None         | KLI700 43.1 |
| SNP        | 1109         | 83.90%         | 0 |          | hypothetical protein CDS | hypothetical protein | None         | KLI700 43.1 |
| SNP        | 1118         | 27.40%         | 0 |          | hypothetical protein CDS | hypothetical protein | None         | KLI700 43.1 |
| SNP        | 1116         | 83.60%         | 0 |          | hypothetical protein CDS | hypothetical protein | None         | KLI700 43.1 |
| SNP        | 1152         | 32.60%         | 0 |          | hypothetical protein CDS | hypothetical protein | None         | KLI700 43.1 |
| AAT -> GAC | 1257 -> 1266 | 27.5% -> 27.9% | 0 | I -> V   | hypothetical protein CDS | hypothetical protein | Substitution | KLI700 43.1 |
| SNP        | 1266         | 58.10%         | 0 | I -> V   | hypothetical protein CDS | hypothetical protein | Substitution | KLI700 43.1 |
| SNP        | 1271         | 53.60%         | 0 |          | hypothetical protein CDS | hypothetical protein | None         | KLI700 43.1 |
| SNP        | 1271         | 32.30%         | 0 |          | hypothetical protein CDS | hypothetical protein | None         | KLI700 43.1 |
| SNP        | 1282         | 53.10%         | 0 |          | hypothetical protein CDS | hypothetical protein | None         | KLI700 43.1 |
| CG -> AT   | 1282 -> 1289 | 32.0% -> 32.2% | 0 | T -> N   | hypothetical protein CDS | hypothetical protein | Substitution | KLI700 43.1 |
| SNP        | 1292         | 51.90%         | 0 |          | hypothetical protein CDS | hypothetical protein | None         | KLI700 43.1 |
| TGG -> CTT | 1298 -> 1299 | 50.9% -> 51.2% | 0 | TN -> KD | hypothetical protein CDS | hypothetical protein | Substitution | KLI700 43.1 |
| SNP        | 1302         | 50.80%         | 0 |          | hypothetical protein CDS | hypothetical protein | None         | KLI700 43.1 |
| SNP        | 1332         | 38.30%         | 0 |          | hypothetical protein CDS | hypothetical protein | None         | KLI700 43.1 |
| SNP        | 1345         | 26.20%         | 0 |          | hypothetical protein CDS | hypothetical protein | None         | KLI700 43.1 |
| SNP        | 1350         | 49.00%         | 0 |          | hypothetical protein CDS | hypothetical protein | None         | KLI700 43.1 |
| SNP        | 1344         | 70.90%         | 0 |          | hypothetical protein CDS | hypothetical protein | None         | KLI700 43.1 |

|                                        |   |      |      |   |        |      |                    |        |   |        |                          |                      |             |             |
|----------------------------------------|---|------|------|---|--------|------|--------------------|--------|---|--------|--------------------------|----------------------|-------------|-------------|
| Variables: VaphiSt2_B_FDSW210055056-1r | C | 986  | 986  | 1 | G -> C | 1365 | SNP (transversion) | 70.80% | 0 |        | hypothetical protein CDS | hypothetical protein | None        | KLI700 43.1 |
| Variables: VaphiSt2_B_FDSW210055056-1r | T | 1013 | 1013 | 1 | C -> T | 1449 | SNP (transition)   | 34.80% | 0 |        | hypothetical protein CDS | hypothetical protein | None        | KLI700 43.1 |
| Variables: VaphiSt2_B_FDSW210055056-1r | G | 1025 | 1025 | 1 | C -> G | 1455 | SNP (transversion) | 41.00% | 0 |        | hypothetical protein CDS | hypothetical protein | None        | KLI700 43.1 |
| Variables: VaphiSt2_B_FDSW210055056-1r | T | 1025 | 1025 | 1 | C -> T | 1455 | SNP (transition)   | 38.00% | 0 |        | hypothetical protein CDS | hypothetical protein | None        | KLI700 43.1 |
| Variables: VaphiSt2_B_FDSW210055056-1r | G | 1028 | 1028 | 1 | C -> G | 1488 | SNP (transversion) | 27.10% | 0 |        | hypothetical protein CDS | hypothetical protein | None        | KLI700 43.1 |
| Variables: VaphiSt2_B_FDSW210055056-1r | T | 1054 | 1054 | 1 | C -> T | 1578 | SNP (transition)   | 62.70% | 0 | A -> T | hypothetical protein CDS | hypothetical protein | Substituted | KLI700 43.1 |
| Variables: VaphiSt2_B_FDSW210055056-1r | A | 1055 | 1055 | 1 | C -> A | 1573 | SNP (transversion) | 31.40% | 0 |        | hypothetical protein CDS | hypothetical protein | None        | KLI700 43.1 |
| Variables: VaphiSt2_B_FDSW210055056-1r | G | 1055 | 1055 | 1 | C -> G | 1573 | SNP (transversion) | 44.50% | 0 |        | hypothetical protein CDS | hypothetical protein | None        | KLI700 43.1 |
| Variables: VaphiSt2_B_FDSW210055056-1r | A | 1062 | 1062 | 1 | T -> A | 1577 | SNP (transversion) | 57.30% | 0 | Y -> F | hypothetical protein CDS | hypothetical protein | Substituted | KLI700 43.1 |

## Contig 52

| Variant                                      | Name | Minimum | Maximum | Length | Change   | Coverage   | Polymorphism Type  | Variant Frequency | Variant P-Value (approximate) |
|----------------------------------------------|------|---------|---------|--------|----------|------------|--------------------|-------------------|-------------------------------|
| Variants: VaAphrodite_B_FDSW210055058-2r     | T    | 18      | 18      | 1      | C -> T   | 180        | SNP (transition)   | 32.80%            | 2.60E-141                     |
| Variants: VaAphrodite_B_FDSW210055058-2r     | G    | 25      | 25      | 1      | A -> G   | 183        | SNP (transition)   | 31.70%            | 6.40E-138                     |
| Variants: VaAphrodite_B_FDSW210055058-2r     | AG   | 35      | 36      | 2      | GA -> AG | 168 -> 169 | Substitution       | 29.6% -> 29.8%    | 2.30E-117                     |
| Variants: VaAphrodite_C_FDSW210055059-1r     | T    | 18      | 18      | 1      | C -> T   | 235        | SNP (transition)   | 31.10%            | 5.70E-187                     |
| Variants: VaAphrodite_C_FDSW210055059-1r     | G    | 25      | 25      | 1      | A -> G   | 233        | SNP (transition)   | 28.80%            | 2.20E-162                     |
| Variants: VaAres1_A_FDSW210055060-2r         | T    | 18      | 18      | 1      | C -> T   | 109        | SNP (transition)   | 26.60%            | 2.70E-64                      |
| Variants: VaAres1_A_FDSW210055060-2r         | G    | 25      | 25      | 1      | A -> G   | 109        | SNP (transition)   | 26.60%            | 2.70E-64                      |
| Variants: VaAres1_B_FDSW210055061-2r         | A    | 1519    | 1519    | 1      | C -> A   | 56         | SNP (transversion) | 28.60%            | 2.60E-46                      |
| Variants: VaAres1_B_FDSW210055061-2r         | G    | 1520    | 1520    | 1      | A -> G   | 74         | SNP (transition)   | 27.00%            | 5.80E-53                      |
| Variants: VaAres1_B_FDSW210055061-2r         | G    | 1521    | 1521    | 1      | C -> G   | 94         | SNP (transversion) | 25.50%            | 5.70E-65                      |
| Variants: VaAres1_C_FDSW210055062-1r         | T    | 18      | 18      | 1      | C -> T   | 173        | SNP (transition)   | 27.20%            | 4.50E-113                     |
| Variants: VaAres1_C_FDSW210055062-1r         | G    | 25      | 25      | 1      | A -> G   | 178        | SNP (transition)   | 25.80%            | 1.50E-109                     |
| Variants: VaAres1_C_FDSW210055062-1r         | A    | 35      | 35      | 1      | G -> A   | 170        | SNP (transition)   | 25.30%            | 4.70E-102                     |
| Variants: VaphiVaphiSt2_B_A_FDSW210055054-2r | T    | 18      | 18      | 1      | C -> T   | 143        | SNP (transition)   | 25.20%            | 5.00E-82                      |
| Variants: VaphiSt2_B_FDSW210055056-1r        | T    | 18      | 18      | 1      | C -> T   | 262        | SNP (transition)   | 27.50%            | 6.50E-180                     |
| Variants: VaphiSt2_B_FDSW210055056-1r        | G    | 25      | 25      | 1      | A -> G   | 262        | SNP (transition)   | 26.70%            | 5.60E-167                     |



## Contig 53

| Variant                                  | Name | Minimum | Maximum | Length | Change       | Coverage | Polymorphism Type        | Variant Frequency | Variant P-Value (approximate) |
|------------------------------------------|------|---------|---------|--------|--------------|----------|--------------------------|-------------------|-------------------------------|
| Variants: VaAphrodite_A_FDSW210055057-2r | A    | 36      | 36      | 1      | G -> A       | 2079     | SNP (transition)         | 26.20%            | 0                             |
| Variants: VaAphrodite_A_FDSW210055057-2r | T    | 856     | 856     | 1      | A -> T       | 3958     | SNP (transversion)       | 25.80%            | 0                             |
| Variants: VaAphrodite_A_FDSW210055057-2r | C    | 1196    | 1196    | 1      | A -> C       | 3835     | SNP (transversion)       | 49.80%            | 0                             |
| Variants: VaAphrodite_A_FDSW210055057-2r |      | 2519    | 2519    | 1      | (A)3 -> (A)2 | 3773     | Deletion (tandem repeat) | 25.00%            | 0                             |
| Variants: VaAphrodite_A_FDSW210055057-2r | A    | 2748    | 2748    | 1      | C -> A       | 3679     | SNP (transversion)       | 30.90%            | 0                             |
| Variants: VaAphrodite_A_FDSW210055057-2r | A    | 2757    | 2757    | 1      | G -> A       | 3649     | SNP (transition)         | 30.70%            | 0                             |
| Variants: VaAphrodite_A_FDSW210055057-2r | C    | 2759    | 2759    | 1      | T -> C       | 3650     | SNP (transition)         | 30.80%            | 0                             |
| Variants: VaAphrodite_B_FDSW210055058-2r | A    | 36      | 36      | 1      | G -> A       | 1555     | SNP (transition)         | 31.70%            | 0                             |
| Variants: VaAphrodite_B_FDSW210055058-2r | T    | 856     | 856     | 1      | A -> T       | 2920     | SNP (transversion)       | 25.50%            | 0                             |
| Variants: VaAphrodite_B_FDSW210055058-2r | C    | 1196    | 1196    | 1      | A -> C       | 2826     | SNP (transversion)       | 49.90%            | 0                             |
| Variants: VaAphrodite_B_FDSW210055058-2r | A    | 2748    | 2748    | 1      | C -> A       | 2843     | SNP (transversion)       | 32.10%            | 0                             |
| Variants: VaAphrodite_B_FDSW210055058-2r | A    | 2757    | 2757    | 1      | G -> A       | 2844     | SNP (transition)         | 32.10%            | 0                             |
| Variants: VaAphrodite_B_FDSW210055058-2r | C    | 2759    | 2759    | 1      | T -> C       | 2849     | SNP (transition)         | 32.10%            | 0                             |
| Variants: VaAphrodite_C_FDSW210055059-1r | T    | 856     | 856     | 1      | A -> T       | 3639     | SNP (transversion)       | 25.40%            | 0                             |
| Variants: VaAphrodite_C_FDSW210055059-1r | C    | 1196    | 1196    | 1      | A -> C       | 3480     | SNP (transversion)       | 50.30%            | 0                             |
| Variants: VaAphrodite_C_FDSW210055059-1r | A    | 2748    | 2748    | 1      | C -> A       | 3688     | SNP (transversion)       | 31.10%            | 0                             |
| Variants: VaAphrodite_C_FDSW210055059-1r | A    | 2757    | 2757    | 1      | G -> A       | 3661     | SNP (transition)         | 31.30%            | 0                             |
| Variants: VaAphrodite_C_FDSW210055059-1r | C    | 2759    | 2759    | 1      | T -> C       | 3647     | SNP (transition)         | 31.10%            | 0                             |
| Variants: VaAres1_A_FDSW210055060-2r     | A    | 36      | 36      | 1      | G -> A       | 1223     | SNP (transition)         | 30.10%            | 0                             |
| Variants: VaAres1_A_FDSW210055060-2r     | C    | 1196    | 1196    | 1      | A -> C       | 2336     | SNP (transversion)       | 47.80%            | 0                             |
| Variants: VaAres1_A_FDSW210055060-2r     | A    | 2748    | 2748    | 1      | C -> A       | 2434     | SNP (transversion)       | 31.70%            | 0                             |
| Variants: VaAres1_A_FDSW210055060-2r     | A    | 2757    | 2757    | 1      | G -> A       | 2442     | SNP (transition)         | 30.80%            | 0                             |
| Variants: VaAres1_A_FDSW210055060-2r     | C    | 2759    | 2759    | 1      | T -> C       | 2440     | SNP (transition)         | 30.80%            | 0                             |
| Variants: VaAres1_B_FDSW210055061-2r     | A    | 36      | 36      | 1      | G -> A       | 1771     | SNP (transition)         | 25.60%            | 0                             |
| Variants: VaAres1_B_FDSW210055061-2r     | T    | 856     | 856     | 1      | A -> T       | 3122     | SNP (transversion)       | 25.70%            | 0                             |
| Variants: VaAres1_B_FDSW210055061-2r     | C    | 1196    | 1196    | 1      | A -> C       | 3354     | SNP (transversion)       | 47.80%            | 0                             |
| Variants: VaAres1_B_FDSW210055061-2r     | A    | 2748    | 2748    | 1      | C -> A       | 3046     | SNP (transversion)       | 31.30%            | 0                             |
| Variants: VaAres1_B_FDSW210055061-2r     | A    | 2757    | 2757    | 1      | G -> A       | 2968     | SNP (transition)         | 30.20%            | 0                             |
| Variants: VaAres1_B_FDSW210055061-2r     | C    | 2759    | 2759    | 1      | T -> C       | 2948     | SNP (transition)         | 30.40%            | 0                             |

|                                              |   |      |      |   |        |      |                    |        |   |
|----------------------------------------------|---|------|------|---|--------|------|--------------------|--------|---|
| Variants: VaAres1_C_FDSW210055062-1r         | A | 36   | 36   | 1 | G -> A | 2038 | SNP (transition)   | 28.20% | 0 |
| Variants: VaAres1_C_FDSW210055062-1r         | T | 856  | 856  | 1 | A -> T | 4120 | SNP (transversion) | 27.10% | 0 |
| Variants: VaAres1_C_FDSW210055062-1r         | C | 1196 | 1196 | 1 | A -> C | 3833 | SNP (transversion) | 52.10% | 0 |
| Variants: VaAres1_C_FDSW210055062-1r         | A | 2748 | 2748 | 1 | C -> A | 3752 | SNP (transversion) | 33.20% | 0 |
| Variants: VaAres1_C_FDSW210055062-1r         | A | 2757 | 2757 | 1 | G -> A | 3723 | SNP (transition)   | 33.00% | 0 |
| Variants: VaAres1_C_FDSW210055062-1r         | C | 2759 | 2759 | 1 | T -> C | 3734 | SNP (transition)   | 32.90% | 0 |
| Variants: VaphiVaphiSt2_B_A_FDSW210055054-2r | A | 36   | 36   | 1 | G -> A | 1134 | SNP (transition)   | 27.60% | 0 |
| Variants: VaphiVaphiSt2_B_A_FDSW210055054-2r | T | 856  | 856  | 1 | A -> T | 2187 | SNP (transversion) | 25.50% | 0 |
| Variants: VaphiVaphiSt2_B_A_FDSW210055054-2r | C | 1196 | 1196 | 1 | A -> C | 2260 | SNP (transversion) | 46.90% | 0 |
| Variants: VaphiVaphiSt2_B_A_FDSW210055054-2r | A | 2748 | 2748 | 1 | C -> A | 2039 | SNP (transversion) | 28.80% | 0 |
| Variants: VaphiVaphiSt2_B_A_FDSW210055054-2r | A | 2757 | 2757 | 1 | G -> A | 2009 | SNP (transition)   | 28.70% | 0 |
| Variants: VaphiVaphiSt2_B_A_FDSW210055054-2r | C | 2759 | 2759 | 1 | T -> C | 2004 | SNP (transition)   | 28.60% | 0 |
| Variants: VaphiSt2_B_FDSW210055056-1r        | A | 36   | 36   | 1 | G -> A | 2116 | SNP (transition)   | 31.80% | 0 |
| Variants: VaphiSt2_B_FDSW210055056-1r        | C | 1196 | 1196 | 1 | A -> C | 3860 | SNP (transversion) | 48.20% | 0 |
| Variants: VaphiSt2_B_FDSW210055056-1r        | A | 2748 | 2748 | 1 | C -> A | 4007 | SNP (transversion) | 30.70% | 0 |
| Variants: VaphiSt2_B_FDSW210055056-1r        | A | 2757 | 2757 | 1 | G -> A | 3993 | SNP (transition)   | 30.90% | 0 |
| Variants: VaphiSt2_B_FDSW210055056-1r        | C | 2759 | 2759 | 1 | T -> C | 4008 | SNP (transition)   | 30.90% | 0 |

## Contig 54

| Variant                                  | Name | Minimum | Maximum | Length | Change       | Coverage     | Polymorphism Type         | Variant Frequency | Variant P-Value (approximate) |
|------------------------------------------|------|---------|---------|--------|--------------|--------------|---------------------------|-------------------|-------------------------------|
| Variants: VaAphrodite_A_FDSW210055057-2r | C    | 38      | 38      | 1      | T -> C       | 1399         | SNP (transition)          | 27.10%            | 0                             |
| Variants: VaAphrodite_A_FDSW210055057-2r | G    | 61      | 61      | 1      | A -> G       | 1641         | SNP (transition)          | 28.30%            | 0                             |
| Variants: VaAphrodite_A_FDSW210055057-2r | T    | 72      | 72      | 1      | C -> T       | 1803         | SNP (transition)          | 27.60%            | 0                             |
| Variants: VaAphrodite_A_FDSW210055057-2r | G    | 1153    | 1153    | 1      | A -> G       | 3861         | SNP (transition)          | 32.00%            | 0                             |
| Variants: VaAphrodite_A_FDSW210055057-2r | T    | 1172    | 1172    | 1      | C -> T       | 3877         | SNP (transition)          | 36.50%            | 0                             |
| Variants: VaAphrodite_A_FDSW210055057-2r | C    | 1173    | 1173    | 1      | T -> C       | 3886         | SNP (transition)          | 39.70%            | 0                             |
| Variants: VaAphrodite_A_FDSW210055057-2r | G    | 1550    | 1550    | 1      | A -> G       | 3360         | SNP (transition)          | 28.40%            | 0                             |
| Variants: VaAphrodite_A_FDSW210055057-2r | A    | 1679    | 1678    | 0      | (A)2 -> (A)3 | 2389         | Insertion (tandem repeat) | 46.20%            | 0                             |
| Variants: VaAphrodite_A_FDSW210055057-2r | CGAA | 1707    | 1710    | 4      | TTTC -> CGAA | 2038 -> 2081 | Substitution              | 33.9% -> 34.7%    | 0                             |
| Variants: VaAphrodite_B_FDSW210055058-2r | C    | 38      | 38      | 1      | T -> C       | 1137         | SNP (transition)          | 27.40%            | 0                             |
| Variants: VaAphrodite_B_FDSW210055058-2r | A    | 46      | 46      | 1      | G -> A       | 1241         | SNP (transition)          | 26.10%            | 0                             |
| Variants: VaAphrodite_B_FDSW210055058-2r | G    | 61      | 61      | 1      | A -> G       | 1477         | SNP (transition)          | 32.80%            | 0                             |
| Variants: VaAphrodite_B_FDSW210055058-2r | T    | 72      | 72      | 1      | C -> T       | 1573         | SNP (transition)          | 31.20%            | 0                             |
| Variants: VaAphrodite_B_FDSW210055058-2r | G    | 1153    | 1153    | 1      | A -> G       | 2982         | SNP (transition)          | 30.00%            | 0                             |
| Variants: VaAphrodite_B_FDSW210055058-2r | T    | 1172    | 1172    | 1      | C -> T       | 2962         | SNP (transition)          | 36.50%            | 0                             |
| Variants: VaAphrodite_B_FDSW210055058-2r | C    | 1173    | 1173    | 1      | T -> C       | 2977         | SNP (transition)          | 38.80%            | 0                             |
| Variants: VaAphrodite_B_FDSW210055058-2r | G    | 1550    | 1550    | 1      | A -> G       | 2753         | SNP (transition)          | 25.50%            | 0                             |
| Variants: VaAphrodite_B_FDSW210055058-2r | A    | 1679    | 1678    | 0      | (A)2 -> (A)3 | 2058         | Insertion (tandem repeat) | 48.10%            | 0                             |
| Variants: VaAphrodite_B_FDSW210055058-2r | CGAA | 1707    | 1710    | 4      | TTTC -> CGAA | 1737 -> 1783 | Substitution              | 36.6% -> 37.2%    | 0                             |
| Variants: VaAphrodite_C_FDSW210055059-1r | C    | 38      | 38      | 1      | T -> C       | 1411         | SNP (transition)          | 25.70%            | 0                             |
| Variants: VaAphrodite_C_FDSW210055059-1r | A    | 46      | 46      | 1      | G -> A       | 1480         | SNP (transition)          | 28.90%            | 0                             |
| Variants: VaAphrodite_C_FDSW210055059-1r | G    | 61      | 61      | 1      | A -> G       | 1755         | SNP (transition)          | 34.60%            | 0                             |
| Variants: VaAphrodite_C_FDSW210055059-1r | T    | 72      | 72      | 1      | C -> T       | 1903         | SNP (transition)          | 33.70%            | 0                             |
| Variants: VaAphrodite_C_FDSW210055059-1r | G    | 1153    | 1153    | 1      | A -> G       | 3637         | SNP (transition)          | 31.50%            | 0                             |
| Variants: VaAphrodite_C_FDSW210055059-1r | T    | 1172    | 1172    | 1      | C -> T       | 3679         | SNP (transition)          | 35.50%            | 0                             |
| Variants: VaAphrodite_C_FDSW210055059-1r | C    | 1173    | 1173    | 1      | T -> C       | 3671         | SNP (transition)          | 39.00%            | 0                             |
| Variants: VaAphrodite_C_FDSW210055059-1r | G    | 1550    | 1550    | 1      | A -> G       | 3445         | SNP (transition)          | 27.60%            | 0                             |
| Variants: VaAphrodite_C_FDSW210055059-1r | A    | 1679    | 1678    | 0      | (A)2 -> (A)3 | 2599         | Insertion (tandem repeat) | 46.70%            | 0                             |
| Variants: VaAphrodite_C_FDSW210055059-1r | CGAA | 1707    | 1710    | 4      | TTTC -> CGAA | 2086 -> 2127 | Substitution              | 34.7% -> 35.2%    | 0                             |

|                                              |      |      |      |   |              |              |                           |                |   |
|----------------------------------------------|------|------|------|---|--------------|--------------|---------------------------|----------------|---|
| Variants: VaAres1_A_FDSW210055060-2r         | C    | 38   | 38   | 1 | T -> C       | 880          | SNP (transition)          | 25.70%         | 0 |
| Variants: VaAres1_A_FDSW210055060-2r         | G    | 61   | 61   | 1 | A -> G       | 1064         | SNP (transition)          | 30.30%         | 0 |
| Variants: VaAres1_A_FDSW210055060-2r         | T    | 72   | 72   | 1 | C -> T       | 1151         | SNP (transition)          | 29.50%         | 0 |
| Variants: VaAres1_A_FDSW210055060-2r         | G    | 1153 | 1153 | 1 | A -> G       | 2445         | SNP (transition)          | 31.80%         | 0 |
| Variants: VaAres1_A_FDSW210055060-2r         | T    | 1172 | 1172 | 1 | C -> T       | 2428         | SNP (transition)          | 34.40%         | 0 |
| Variants: VaAres1_A_FDSW210055060-2r         | C    | 1173 | 1173 | 1 | T -> C       | 2435         | SNP (transition)          | 40.70%         | 0 |
| Variants: VaAres1_A_FDSW210055060-2r         | G    | 1550 | 1550 | 1 | A -> G       | 2065         | SNP (transition)          | 26.00%         | 0 |
| Variants: VaAres1_A_FDSW210055060-2r         | A    | 1679 | 1678 | 0 | (A)2 -> (A)3 | 1489         | Insertion (tandem repeat) | 42.80%         | 0 |
| Variants: VaAres1_A_FDSW210055060-2r         | CGAA | 1707 | 1710 | 4 | TTTC -> CGAA | 1312 -> 1333 | Substitution              | 34.4% -> 35.0% | 0 |
| Variants: VaAres1_B_FDSW210055061-2r         | G    | 61   | 61   | 1 | A -> G       | 1310         | SNP (transition)          | 29.40%         | 0 |
| Variants: VaAres1_B_FDSW210055061-2r         | T    | 72   | 72   | 1 | C -> T       | 1385         | SNP (transition)          | 29.20%         | 0 |
| Variants: VaAres1_B_FDSW210055061-2r         | G    | 1153 | 1153 | 1 | A -> G       | 3109         | SNP (transition)          | 30.60%         | 0 |
| Variants: VaAres1_B_FDSW210055061-2r         | T    | 1172 | 1172 | 1 | C -> T       | 3098         | SNP (transition)          | 36.10%         | 0 |
| Variants: VaAres1_B_FDSW210055061-2r         | C    | 1173 | 1173 | 1 | T -> C       | 3106         | SNP (transition)          | 41.40%         | 0 |
| Variants: VaAres1_B_FDSW210055061-2r         | G    | 1550 | 1550 | 1 | A -> G       | 2425         | SNP (transition)          | 25.20%         | 0 |
| Variants: VaAres1_B_FDSW210055061-2r         | A    | 1679 | 1678 | 0 | (A)2 -> (A)3 | 1828         | Insertion (tandem repeat) | 44.70%         | 0 |
| Variants: VaAres1_B_FDSW210055061-2r         | CGAA | 1707 | 1710 | 4 | TTTC -> CGAA | 1651 -> 1677 | Substitution              | 31.6% -> 32.8% | 0 |
| Variants: VaAres1_C_FDSW210055062-1r         | G    | 61   | 61   | 1 | A -> G       | 1793         | SNP (transition)          | 30.50%         | 0 |
| Variants: VaAres1_C_FDSW210055062-1r         | T    | 72   | 72   | 1 | C -> T       | 1934         | SNP (transition)          | 29.60%         | 0 |
| Variants: VaAres1_C_FDSW210055062-1r         | G    | 1153 | 1153 | 1 | A -> G       | 4064         | SNP (transition)          | 31.40%         | 0 |
| Variants: VaAres1_C_FDSW210055062-1r         | T    | 1172 | 1172 | 1 | C -> T       | 4067         | SNP (transition)          | 33.30%         | 0 |
| Variants: VaAres1_C_FDSW210055062-1r         | C    | 1173 | 1173 | 1 | T -> C       | 4077         | SNP (transition)          | 40.10%         | 0 |
| Variants: VaAres1_C_FDSW210055062-1r         | G    | 1550 | 1550 | 1 | A -> G       | 3380         | SNP (transition)          | 26.90%         | 0 |
| Variants: VaAres1_C_FDSW210055062-1r         | A    | 1679 | 1678 | 0 | (A)2 -> (A)3 | 2261         | Insertion (tandem repeat) | 45.90%         | 0 |
| Variants: VaAres1_C_FDSW210055062-1r         | CGAA | 1707 | 1710 | 4 | TTTC -> CGAA | 1938 -> 1990 | Substitution              | 33.7% -> 34.5% | 0 |
| Variants: VaphiVaphiSt2_B_A_FDSW210055054-2r | C    | 38   | 38   | 1 | T -> C       | 754          | SNP (transition)          | 25.20%         | 0 |
| Variants: VaphiVaphiSt2_B_A_FDSW210055054-2r | A    | 46   | 46   | 1 | G -> A       | 815          | SNP (transition)          | 25.60%         | 0 |
| Variants: VaphiVaphiSt2_B_A_FDSW210055054-2r | G    | 61   | 61   | 1 | A -> G       | 916          | SNP (transition)          | 33.10%         | 0 |
| Variants: VaphiVaphiSt2_B_A_FDSW210055054-2r | T    | 72   | 72   | 1 | C -> T       | 1002         | SNP (transition)          | 32.30%         | 0 |
| Variants: VaphiVaphiSt2_B_A_FDSW210055054-2r | G    | 1153 | 1153 | 1 | A -> G       | 2272         | SNP (transition)          | 32.20%         | 0 |
| Variants: VaphiVaphiSt2_B_A_FDSW210055054-2r | T    | 1172 | 1172 | 1 | C -> T       | 2260         | SNP (transition)          | 35.00%         | 0 |
| Variants: VaphiVaphiSt2_B_A_FDSW210055054-2r | C    | 1173 | 1173 | 1 | T -> C       | 2268         | SNP (transition)          | 41.30%         | 0 |

|                                              |      |      |      |   |              |              |                           |                |   |
|----------------------------------------------|------|------|------|---|--------------|--------------|---------------------------|----------------|---|
| Variants: VaphiVaphiSt2_B_A_FDSW210055054-2r | G    | 1550 | 1550 | 1 | A -> G       | 1916         | SNP (transition)          | 25.50%         | 0 |
| Variants: VaphiVaphiSt2_B_A_FDSW210055054-2r | A    | 1679 | 1678 | 0 | (A)2 -> (A)3 | 1372         | Insertion (tandem repeat) | 45.30%         | 0 |
| Variants: VaphiVaphiSt2_B_A_FDSW210055054-2r | CGAA | 1707 | 1710 | 4 | TTTC -> CGAA | 1189 -> 1203 | Substitution              | 33.1% -> 33.5% | 0 |
| Variants: VaphiSt2_B_FDSW210055056-1r        | C    | 38   | 38   | 1 | T -> C       | 1557         | SNP (transition)          | 27.10%         | 0 |
| Variants: VaphiSt2_B_FDSW210055056-1r        | A    | 46   | 46   | 1 | G -> A       | 1706         | SNP (transition)          | 26.70%         | 0 |
| Variants: VaphiSt2_B_FDSW210055056-1r        | G    | 61   | 61   | 1 | A -> G       | 1982         | SNP (transition)          | 33.10%         | 0 |
| Variants: VaphiSt2_B_FDSW210055056-1r        | T    | 72   | 72   | 1 | C -> T       | 2178         | SNP (transition)          | 31.30%         | 0 |
| Variants: VaphiSt2_B_FDSW210055056-1r        | G    | 1153 | 1153 | 1 | A -> G       | 4230         | SNP (transition)          | 30.60%         | 0 |
| Variants: VaphiSt2_B_FDSW210055056-1r        | T    | 1172 | 1172 | 1 | C -> T       | 4223         | SNP (transition)          | 37.10%         | 0 |
| Variants: VaphiSt2_B_FDSW210055056-1r        | C    | 1173 | 1173 | 1 | T -> C       | 4226         | SNP (transition)          | 39.70%         | 0 |
| Variants: VaphiSt2_B_FDSW210055056-1r        | G    | 1550 | 1550 | 1 | A -> G       | 3845         | SNP (transition)          | 26.60%         | 0 |
| Variants: VaphiSt2_B_FDSW210055056-1r        | A    | 1679 | 1678 | 0 | (A)2 -> (A)3 | 2638         | Insertion (tandem repeat) | 46.10%         | 0 |
| Variants: VaphiSt2_B_FDSW210055056-1r        | CGAA | 1707 | 1710 | 4 | TTTC -> CGAA | 2226 -> 2270 | Substitution              | 32.6% -> 33.3% | 0 |

## Contig 57

| Variant                        | Name | Minimum | Maximum | Length | Change | Coverage | Polymorphism Type  | Variant Frequency | Variant P-Value (approximate) | Amino Acid Change | CDS           | product       | Protein Effect | protein_id  |
|--------------------------------|------|---------|---------|--------|--------|----------|--------------------|-------------------|-------------------------------|-------------------|---------------|---------------|----------------|-------------|
| VaAphrodite_A_FDSW210055057-2r | G    | 159     | 159     | 1      | T -> G | 283      | SNP (transversion) | 44.90%            |                               | 0                 | RTX toxin CDS | RTX toxin     | None           | KLI6996.8.1 |
| VaAphrodite_A_FDSW210055057-2r | G    | 173     | 173     | 1      | A -> G | 295      | SNP (transition)   | 45.40%            |                               | 0                 | D -> G        | RTX toxin CDS | Substitution   | KLI6996.8.1 |
| VaAphrodite_A_FDSW210055057-2r | A    | 201     | 201     | 1      | G -> A | 304      | SNP (transition)   | 53.60%            |                               | 0                 |               | RTX toxin CDS | None           | KLI6996.8.1 |
| VaAphrodite_A_FDSW210055057-2r | G    | 363     | 363     | 1      | A -> G | 292      | SNP (transition)   | 56.20%            |                               | 0                 |               | RTX toxin CDS | None           | KLI6996.8.1 |
| VaAphrodite_A_FDSW210055057-2r | G    | 427     | 427     | 1      | A -> G | 288      | SNP (transition)   | 53.50%            |                               | 0                 | I -> V        | RTX toxin CDS | Substitution   | KLI6996.8.1 |
| VaAphrodite_A_FDSW210055057-2r | C    | 437     | 437     | 1      | T -> C | 294      | SNP (transition)   | 53.70%            |                               | 0                 | L -> S        | RTX toxin CDS | Substitution   | KLI6996.8.1 |
| VaAphrodite_A_FDSW210055057-2r | G    | 723     | 723     | 1      | A -> G | 296      | SNP (transition)   | 51.00%            |                               | 0                 |               | RTX toxin CDS | None           | KLI6996.8.1 |
| VaAphrodite_A_FDSW210055057-2r | G    | 728     | 728     | 1      | T -> G | 295      | SNP (transversion) | 51.50%            |                               | 0                 | V -> G        | RTX toxin CDS | Substitution   | KLI6996.8.1 |
| VaAphrodite_A_FDSW210055057-2r | A    | 745     | 745     | 1      | G -> A | 285      | SNP (transition)   | 50.90%            |                               | 0                 | A -> T        | RTX toxin CDS | Substitution   | KLI6996.8.1 |
| VaAphrodite_A_FDSW210055057-2r | A    | 840     | 840     | 1      | G -> A | 282      | SNP (transition)   | 52.10%            |                               | 0                 |               | RTX toxin CDS | None           | KLI6996.8.1 |
| VaAphrodite_A_FDSW210055057-2r | C    | 986     | 986     | 1      | T -> C | 278      | SNP (transition)   | 46.80%            |                               | 0                 | I -> T        | RTX toxin CDS | Substitution   | KLI6996.8.1 |
| VaAphrodite_A_FDSW210055057-2r | T    | 1019    | 1019    | 1      | C -> T | 259      | SNP (transition)   | 46.70%            |                               | 0                 | T -> M        | RTX toxin CDS | Substitution   | KLI6996.8.1 |
| VaAphrodite_A_FDSW210055057-2r | C    | 1122    | 1122    | 1      | A -> C | 258      | SNP (transversion) | 56.60%            |                               | 0                 |               | RTX toxin CDS | None           | KLI6996.8.1 |
| VaAphrodite_A_FDSW210055057-2r | A    | 1159    | 1159    | 1      | G -> A | 261      | SNP (transition)   | 54.40%            |                               | 0                 | A -> T        | RTX toxin CDS | Substitution   | KLI6996.8.1 |
| VaAphrodite_A_FDSW210055057-2r | G    | 1191    | 1191    | 1      | A -> G | 258      | SNP (transition)   | 51.20%            |                               | 0                 |               | RTX toxin CDS | None           | KLI6996.8.1 |
| VaAphrodite_A_FDSW210055057-2r | T    | 1323    | 1323    | 1      | C -> T | 250      | SNP (transition)   | 54.00%            |                               | 0                 |               | RTX toxin CDS | None           | KLI6996.8.1 |
| VaAphrodite_A_FDSW210055057-2r | C    | 1353    | 1353    | 1      | T -> C | 232      | SNP (transition)   | 55.20%            |                               | 0                 |               | RTX toxin CDS | None           | KLI6996.8.1 |
| VaAphrodite_A_FDSW210055057-2r | T    | 1418    | 1418    | 1      | C -> T | 223      | SNP (transition)   | 39.50%            | #####                         |                   | S -> L        | RTX toxin CDS | Substitution   | KLI6996.8.1 |
| VaAphrodite_A_FDSW210055057-2r | G    | 1425    | 1425    | 1      | A -> G | 216      | SNP (transition)   | 37.00%            | #####                         |                   |               | RTX toxin CDS | None           | KLI6996.8.1 |
| VaAphrodite_B_FDSW210055058-2r | G    | 159     | 159     | 1      | T -> G | 227      | SNP (transversion) | 44.90%            | #####                         |                   |               | RTX toxin CDS | None           | KLI6996.8.1 |
| VaAphrodite_B_FDSW210055058-2r | G    | 173     | 173     | 1      | A -> G | 238      | SNP (transition)   | 45.40%            | 0.00E+00                      |                   | D -> G        | RTX toxin CDS | Substitution   | KLI6996.8.1 |
| VaAphrodite_B_FDSW210055058-2r | A    | 201     | 201     | 1      | G -> A | 247      | SNP (transition)   | 53.40%            |                               | 0                 |               | RTX toxin CDS | None           | KLI6996.8.1 |
| VaAphrodite_B_FDSW210055058-2r | G    | 363     | 363     | 1      | A -> G | 279      | SNP (transition)   | 45.50%            |                               | 0                 |               | RTX toxin CDS | None           | KLI6996.8.1 |
| VaAphrodite_B_FDSW210055058-2r | G    | 427     | 427     | 1      | A -> G | 278      | SNP (transition)   | 50.70%            |                               | 0                 | I -> V        | RTX toxin CDS | Substitution   | KLI6996.8.1 |
| VaAphrodite_B_FDSW210055058-2r | C    | 437     | 437     | 1      | T -> C | 282      | SNP (transition)   | 50.40%            |                               | 0                 | L -> S        | RTX toxin CDS | Substitution   | KLI6996.8.1 |
| VaAphrodite_B_FDSW210055058-2r | G    | 723     | 723     | 1      | A -> G | 237      | SNP (transition)   | 53.20%            |                               | 0                 |               | RTX toxin CDS | None           | KLI6996.8.1 |
| VaAphrodite_B_FDSW210055058-2r | G    | 728     | 728     | 1      | T -> G | 233      | SNP (transversion) | 52.40%            |                               | 0                 | V -> G        | RTX toxin CDS | Substitution   | KLI6996.8.1 |
| VaAphrodite_B_FDSW210055058-2r | A    | 745     | 745     | 1      | G -> A | 240      | SNP (transition)   | 54.20%            |                               | 0                 | A -> T        | RTX toxin CDS | Substitution   | KLI6996.8.1 |
| VaAphrodite_B_FDSW210055058-2r | A    | 840     | 840     | 1      | G -> A | 200      | SNP (transition)   | 55.00%            |                               | 0                 |               | RTX toxin CDS | None           | KLI6996.8.1 |

|                                          |   |      |      |   |        |     |                    |        |          |        |                  |           |              |                |
|------------------------------------------|---|------|------|---|--------|-----|--------------------|--------|----------|--------|------------------|-----------|--------------|----------------|
| Variants: VaAphrodite_B_FDSW210055058-2r | C | 986  | 986  | 1 | T -> C | 221 | SNP (transition)   | 42.10% | #####    | I -> T | RTX toxin<br>CDS | RTX toxin | Substitution | KLI6996<br>8.1 |
| Variants: VaAphrodite_B_FDSW210055058-2r | T | 1019 | 1019 | 1 | C -> T | 228 | SNP (transition)   | 42.10% | #####    | T -> M | RTX toxin<br>CDS | RTX toxin | Substitution | KLI6996<br>8.1 |
| Variants: VaAphrodite_B_FDSW210055058-2r | C | 1122 | 1122 | 1 | A -> C | 249 | SNP (transversion) | 55.00% |          | 0      | RTX toxin<br>CDS | RTX toxin | None         | KLI6996<br>8.1 |
| Variants: VaAphrodite_B_FDSW210055058-2r | A | 1159 | 1159 | 1 | G -> A | 258 | SNP (transition)   | 57.40% |          | 0      | RTX toxin<br>CDS | RTX toxin | Substitution | KLI6996<br>8.1 |
| Variants: VaAphrodite_B_FDSW210055058-2r | G | 1191 | 1191 | 1 | A -> G | 245 | SNP (transition)   | 52.70% |          | 0      | RTX toxin<br>CDS | RTX toxin | None         | KLI6996<br>8.1 |
| Variants: VaAphrodite_B_FDSW210055058-2r | T | 1323 | 1323 | 1 | C -> T | 274 | SNP (transition)   | 53.30% |          | 0      | RTX toxin<br>CDS | RTX toxin | None         | KLI6996<br>8.1 |
| Variants: VaAphrodite_B_FDSW210055058-2r | C | 1353 | 1353 | 1 | T -> C | 260 | SNP (transition)   | 51.90% |          | 0      | RTX toxin<br>CDS | RTX toxin | None         | KLI6996<br>8.1 |
| Variants: VaAphrodite_B_FDSW210055058-2r | T | 1418 | 1418 | 1 | C -> T | 227 | SNP (transition)   | 40.10% | #####    | S -> L | RTX toxin<br>CDS | RTX toxin | Substitution | KLI6996<br>8.1 |
| Variants: VaAphrodite_B_FDSW210055058-2r | G | 1425 | 1425 | 1 | A -> G | 218 | SNP (transition)   | 37.60% | #####    |        | RTX toxin<br>CDS | RTX toxin | None         | KLI6996<br>8.1 |
| Variants: VaAphrodite_C_FDSW210055059-1r | G | 159  | 159  | 1 | T -> G | 338 | SNP (transversion) | 51.20% |          | 0      | RTX toxin<br>CDS | RTX toxin | None         | KLI6996<br>8.1 |
| Variants: VaAphrodite_C_FDSW210055059-1r | G | 173  | 173  | 1 | A -> G | 333 | SNP (transition)   | 51.40% |          | 0      | RTX toxin<br>CDS | RTX toxin | Substitution | KLI6996<br>8.1 |
| Variants: VaAphrodite_C_FDSW210055059-1r | A | 201  | 201  | 1 | G -> A | 334 | SNP (transition)   | 47.60% |          | 0      | RTX toxin<br>CDS | RTX toxin | None         | KLI6996<br>8.1 |
| Variants: VaAphrodite_C_FDSW210055059-1r | G | 363  | 363  | 1 | A -> G | 392 | SNP (transition)   | 49.70% |          | 0      | RTX toxin<br>CDS | RTX toxin | None         | KLI6996<br>8.1 |
| Variants: VaAphrodite_C_FDSW210055059-1r | G | 427  | 427  | 1 | A -> G | 384 | SNP (transition)   | 48.20% |          | 0      | RTX toxin<br>CDS | RTX toxin | Substitution | KLI6996<br>8.1 |
| Variants: VaAphrodite_C_FDSW210055059-1r | C | 437  | 437  | 1 | T -> C | 390 | SNP (transition)   | 47.70% |          | 0      | RTX toxin<br>CDS | RTX toxin | Substitution | KLI6996<br>8.1 |
| Variants: VaAphrodite_C_FDSW210055059-1r | G | 723  | 723  | 1 | A -> G | 397 | SNP (transition)   | 51.40% |          | 0      | RTX toxin<br>CDS | RTX toxin | None         | KLI6996<br>8.1 |
| Variants: VaAphrodite_C_FDSW210055059-1r | G | 728  | 728  | 1 | T -> G | 391 | SNP (transversion) | 51.70% |          | 0      | RTX toxin<br>CDS | RTX toxin | Substitution | KLI6996<br>8.1 |
| Variants: VaAphrodite_C_FDSW210055059-1r | A | 745  | 745  | 1 | G -> A | 391 | SNP (transition)   | 52.20% |          | 0      | RTX toxin<br>CDS | RTX toxin | Substitution | KLI6996<br>8.1 |
| Variants: VaAphrodite_C_FDSW210055059-1r | A | 840  | 840  | 1 | G -> A | 383 | SNP (transition)   | 54.30% |          | 0      | RTX toxin<br>CDS | RTX toxin | None         | KLI6996<br>8.1 |
| Variants: VaAphrodite_C_FDSW210055059-1r | C | 986  | 986  | 1 | T -> C | 349 | SNP (transition)   | 50.10% |          | 0      | RTX toxin<br>CDS | RTX toxin | Substitution | KLI6996<br>8.1 |
| Variants: VaAphrodite_C_FDSW210055059-1r | T | 1019 | 1019 | 1 | C -> T | 333 | SNP (transition)   | 51.70% |          | 0      | RTX toxin<br>CDS | RTX toxin | Substitution | KLI6996<br>8.1 |
| Variants: VaAphrodite_C_FDSW210055059-1r | C | 1122 | 1122 | 1 | A -> C | 328 | SNP (transversion) | 47.00% |          | 0      | RTX toxin<br>CDS | RTX toxin | None         | KLI6996<br>8.1 |
| Variants: VaAphrodite_C_FDSW210055059-1r | A | 1159 | 1159 | 1 | G -> A | 348 | SNP (transition)   | 47.70% |          | 0      | RTX toxin<br>CDS | RTX toxin | Substitution | KLI6996<br>8.1 |
| Variants: VaAphrodite_C_FDSW210055059-1r | G | 1191 | 1191 | 1 | A -> G | 368 | SNP (transition)   | 45.70% |          | 0      | RTX toxin<br>CDS | RTX toxin | None         | KLI6996<br>8.1 |
| Variants: VaAphrodite_C_FDSW210055059-1r | T | 1323 | 1323 | 1 | C -> T | 360 | SNP (transition)   | 53.90% |          | 0      | RTX toxin<br>CDS | RTX toxin | None         | KLI6996<br>8.1 |
| Variants: VaAphrodite_C_FDSW210055059-1r | C | 1353 | 1353 | 1 | T -> C | 365 | SNP (transition)   | 52.10% |          | 0      | RTX toxin<br>CDS | RTX toxin | None         | KLI6996<br>8.1 |
| Variants: VaAphrodite_C_FDSW210055059-1r | T | 1418 | 1418 | 1 | C -> T | 322 | SNP (transition)   | 42.90% | 1.2E-320 | S -> L | RTX toxin<br>CDS | RTX toxin | Substitution | KLI6996<br>8.1 |
| Variants: VaAphrodite_C_FDSW210055059-1r | G | 1425 | 1425 | 1 | A -> G | 313 | SNP (transition)   | 41.20% | #####    |        | RTX toxin<br>CDS | RTX toxin | None         | KLI6996<br>8.1 |
| Variants: VaAres1_A_FDSW210055060-2r     | G | 159  | 159  | 1 | T -> G | 204 | SNP (transversion) | 47.10% | #####    |        | RTX toxin<br>CDS | RTX toxin | None         | KLI6996<br>8.1 |
| Variants: VaAres1_A_FDSW210055060-2r     | G | 173  | 173  | 1 | A -> G | 201 | SNP (transition)   | 45.80% | #####    | D -> G | RTX toxin<br>CDS | RTX toxin | Substitution | KLI6996<br>8.1 |
| Variants: VaAres1_A_FDSW210055060-2r     | A | 201  | 201  | 1 | G -> A | 202 | SNP (transition)   | 55.00% |          | 0      | RTX toxin<br>CDS | RTX toxin | None         | KLI6996<br>8.1 |
| Variants: VaAres1_A_FDSW210055060-2r     | G | 363  | 363  | 1 | A -> G | 211 | SNP (transition)   | 52.10% | 1.5E-323 |        | RTX toxin<br>CDS | RTX toxin | None         | KLI6996<br>8.1 |

|                                      |   |      |      |   |        |     |                    |        |          |        |               |               |              |              |             |
|--------------------------------------|---|------|------|---|--------|-----|--------------------|--------|----------|--------|---------------|---------------|--------------|--------------|-------------|
| Variants: VaAres1_A_FDSW210055060-2r | G | 427  | 427  | 1 | A -> G | 204 | SNP (transition)   | 53.40% | 2.7E-322 | I -> V | RTX toxin CDS | RTX toxin     | Substitution | KLI6996 8.1  |             |
| Variants: VaAres1_A_FDSW210055060-2r | C | 437  | 437  | 1 | T -> C | 206 | SNP (transition)   | 55.30% |          | 0      | L -> S        | RTX toxin CDS | RTX toxin    | Substitution | KLI6996 8.1 |
| Variants: VaAres1_A_FDSW210055060-2r | G | 723  | 723  | 1 | A -> G | 203 | SNP (transition)   | 55.70% |          | 0      |               | RTX toxin CDS | RTX toxin    | None         | KLI6996 8.1 |
| Variants: VaAres1_A_FDSW210055060-2r | G | 728  | 728  | 1 | T -> G | 203 | SNP (transversion) | 54.20% |          | 0      | V -> G        | RTX toxin CDS | RTX toxin    | Substitution | KLI6996 8.1 |
| Variants: VaAres1_A_FDSW210055060-2r | A | 745  | 745  | 1 | G -> A | 206 | SNP (transition)   | 50.00% | #####    |        | A -> T        | RTX toxin CDS | RTX toxin    | Substitution | KLI6996 8.1 |
| Variants: VaAres1_A_FDSW210055060-2r | A | 840  | 840  | 1 | G -> A | 192 | SNP (transition)   | 50.00% | #####    |        |               | RTX toxin CDS | RTX toxin    | None         | KLI6996 8.1 |
| Variants: VaAres1_A_FDSW210055060-2r | C | 986  | 986  | 1 | T -> C | 190 | SNP (transition)   | 49.50% | #####    |        | I -> T        | RTX toxin CDS | RTX toxin    | Substitution | KLI6996 8.1 |
| Variants: VaAres1_A_FDSW210055060-2r | T | 1019 | 1019 | 1 | C -> T | 195 | SNP (transition)   | 48.20% | #####    |        | T -> M        | RTX toxin CDS | RTX toxin    | Substitution | KLI6996 8.1 |
| Variants: VaAres1_A_FDSW210055060-2r | C | 1122 | 1122 | 1 | A -> C | 208 | SNP (transversion) | 51.40% |          | 0      |               | RTX toxin CDS | RTX toxin    | None         | KLI6996 8.1 |
| Variants: VaAres1_A_FDSW210055060-2r | A | 1159 | 1159 | 1 | G -> A | 205 | SNP (transition)   | 50.70% | 1.1E-314 |        | A -> T        | RTX toxin CDS | RTX toxin    | Substitution | KLI6996 8.1 |
| Variants: VaAres1_A_FDSW210055060-2r | G | 1191 | 1191 | 1 | A -> G | 200 | SNP (transition)   | 47.50% | #####    |        |               | RTX toxin CDS | RTX toxin    | None         | KLI6996 8.1 |
| Variants: VaAres1_A_FDSW210055060-2r | T | 1323 | 1323 | 1 | C -> T | 193 | SNP (transition)   | 51.80% | #####    |        |               | RTX toxin CDS | RTX toxin    | None         | KLI6996 8.1 |
| Variants: VaAres1_A_FDSW210055060-2r | C | 1353 | 1353 | 1 | T -> C | 188 | SNP (transition)   | 49.50% | #####    |        |               | RTX toxin CDS | RTX toxin    | None         | KLI6996 8.1 |
| Variants: VaAres1_A_FDSW210055060-2r | T | 1418 | 1418 | 1 | C -> T | 164 | SNP (transition)   | 43.90% | #####    |        | S -> L        | RTX toxin CDS | RTX toxin    | Substitution | KLI6996 8.1 |
| Variants: VaAres1_A_FDSW210055060-2r | G | 1425 | 1425 | 1 | A -> G | 163 | SNP (transition)   | 41.70% | #####    |        |               | RTX toxin CDS | RTX toxin    | None         | KLI6996 8.1 |
| Variants: VaAres1_B_FDSW210055061-2r | G | 159  | 159  | 1 | T -> G | 230 | SNP (transversion) | 47.80% |          | 0      |               | RTX toxin CDS | RTX toxin    | None         | KLI6996 8.1 |
| Variants: VaAres1_B_FDSW210055061-2r | G | 173  | 173  | 1 | A -> G | 213 | SNP (transition)   | 46.50% | #####    |        | D -> G        | RTX toxin CDS | RTX toxin    | Substitution | KLI6996 8.1 |
| Variants: VaAres1_B_FDSW210055061-2r | A | 201  | 201  | 1 | G -> A | 214 | SNP (transition)   | 51.90% |          | 0      |               | RTX toxin CDS | RTX toxin    | None         | KLI6996 8.1 |
| Variants: VaAres1_B_FDSW210055061-2r | G | 363  | 363  | 1 | A -> G | 205 | SNP (transition)   | 48.30% | #####    |        |               | RTX toxin CDS | RTX toxin    | None         | KLI6996 8.1 |
| Variants: VaAres1_B_FDSW210055061-2r | G | 427  | 427  | 1 | A -> G | 223 | SNP (transition)   | 49.30% | 6.8E-320 |        | I -> V        | RTX toxin CDS | RTX toxin    | Substitution | KLI6996 8.1 |
| Variants: VaAres1_B_FDSW210055061-2r | C | 437  | 437  | 1 | T -> C | 211 | SNP (transition)   | 51.20% | 1.6E-316 |        | L -> S        | RTX toxin CDS | RTX toxin    | Substitution | KLI6996 8.1 |
| Variants: VaAres1_B_FDSW210055061-2r | G | 723  | 723  | 1 | A -> G | 238 | SNP (transition)   | 51.70% |          | 0      |               | RTX toxin CDS | RTX toxin    | None         | KLI6996 8.1 |
| Variants: VaAres1_B_FDSW210055061-2r | G | 728  | 728  | 1 | T -> G | 234 | SNP (transversion) | 53.80% |          | 0      | V -> G        | RTX toxin CDS | RTX toxin    | Substitution | KLI6996 8.1 |
| Variants: VaAres1_B_FDSW210055061-2r | A | 745  | 745  | 1 | G -> A | 225 | SNP (transition)   | 50.70% | 6.8E-322 |        | A -> T        | RTX toxin CDS | RTX toxin    | Substitution | KLI6996 8.1 |
| Variants: VaAres1_B_FDSW210055061-2r | A | 840  | 840  | 1 | A -> A | 208 | SNP (transition)   | 46.60% | #####    |        |               | RTX toxin CDS | RTX toxin    | None         | KLI6996 8.1 |
| Variants: VaAres1_B_FDSW210055061-2r | C | 986  | 986  | 1 | T -> C | 211 | SNP (transition)   | 54.50% |          | 0      | I -> T        | RTX toxin CDS | RTX toxin    | Substitution | KLI6996 8.1 |
| Variants: VaAres1_B_FDSW210055061-2r | T | 1019 | 1019 | 1 | C -> T | 218 | SNP (transition)   | 54.10% |          | 0      | T -> M        | RTX toxin CDS | RTX toxin    | Substitution | KLI6996 8.1 |
| Variants: VaAres1_B_FDSW210055061-2r | C | 1122 | 1122 | 1 | A -> C | 231 | SNP (transversion) | 52.40% |          | 0      |               | RTX toxin CDS | RTX toxin    | None         | KLI6996 8.1 |
| Variants: VaAres1_B_FDSW210055061-2r | A | 1159 | 1159 | 1 | G -> A | 223 | SNP (transition)   | 51.10% |          | 0      | A -> T        | RTX toxin CDS | RTX toxin    | Substitution | KLI6996 8.1 |
| Variants: VaAres1_B_FDSW210055061-2r | G | 1191 | 1191 | 1 | A -> G | 214 | SNP (transition)   | 49.50% | 3.5E-319 |        |               | RTX toxin CDS | RTX toxin    | None         | KLI6996 8.1 |
| Variants: VaAres1_B_FDSW210055061-2r | T | 1323 | 1323 | 1 | C -> T | 236 | SNP (transition)   | 49.20% |          | 0      |               | RTX toxin CDS | RTX toxin    | None         | KLI6996 8.1 |
| Variants: VaAres1_B_FDSW210055061-2r | C | 1353 | 1353 | 1 | T -> C | 212 | SNP (transition)   | 47.20% | #####    |        |               | RTX toxin CDS | RTX toxin    | None         | KLI6996 8.1 |



|                                              |   |      |      |   |        |     |                    |        |          |        |               |           |              |             |
|----------------------------------------------|---|------|------|---|--------|-----|--------------------|--------|----------|--------|---------------|-----------|--------------|-------------|
| Variants: VaAres1_B_FDSW210055061-2r         | T | 1418 | 1418 | 1 | C -> T | 188 | SNP (transition)   | 41.00% | #####    | S -> L | RTX toxin CDS | RTX toxin | Substitution | KLI6996 8.1 |
| Variants: VaAres1_B_FDSW210055061-2r         | G | 1425 | 1425 | 1 | A -> G | 185 | SNP (transition)   | 41.10% | #####    |        | RTX toxin CDS | RTX toxin | None         | KLI6996 8.1 |
| Variants: VaAres1_C_FDSW210055062-1r         | G | 159  | 159  | 1 | T -> G | 266 | SNP (transversion) | 50.80% |          | 0      | RTX toxin CDS | RTX toxin | None         | KLI6996 8.1 |
| Variants: VaAres1_C_FDSW210055062-1r         | G | 173  | 173  | 1 | A -> G | 278 | SNP (transition)   | 52.20% |          | 0      | RTX toxin CDS | RTX toxin | Substitution | KLI6996 8.1 |
| Variants: VaAres1_C_FDSW210055062-1r         | A | 201  | 201  | 1 | G -> A | 275 | SNP (transition)   | 47.30% |          | 0      | RTX toxin CDS | RTX toxin | None         | KLI6996 8.1 |
| Variants: VaAres1_C_FDSW210055062-1r         | G | 363  | 363  | 1 | A -> G | 315 | SNP (transition)   | 52.40% |          | 0      | RTX toxin CDS | RTX toxin | None         | KLI6996 8.1 |
| Variants: VaAres1_C_FDSW210055062-1r         | G | 427  | 427  | 1 | A -> G | 312 | SNP (transition)   | 53.80% |          | 0      | RTX toxin CDS | RTX toxin | Substitution | KLI6996 8.1 |
| Variants: VaAres1_C_FDSW210055062-1r         | C | 437  | 437  | 1 | T -> C | 304 | SNP (transition)   | 54.60% |          | 0      | RTX toxin CDS | RTX toxin | Substitution | KLI6996 8.1 |
| Variants: VaAres1_C_FDSW210055062-1r         | G | 723  | 723  | 1 | A -> G | 319 | SNP (transition)   | 51.10% |          | 0      | RTX toxin CDS | RTX toxin | None         | KLI6996 8.1 |
| Variants: VaAres1_C_FDSW210055062-1r         | G | 728  | 728  | 1 | T -> G | 316 | SNP (transversion) | 50.30% |          | 0      | RTX toxin CDS | RTX toxin | Substitution | KLI6996 8.1 |
| Variants: VaAres1_C_FDSW210055062-1r         | A | 745  | 745  | 1 | G -> A | 309 | SNP (transition)   | 50.50% |          | 0      | RTX toxin CDS | RTX toxin | Substitution | KLI6996 8.1 |
| Variants: VaAres1_C_FDSW210055062-1r         | A | 840  | 840  | 1 | A -> A | 303 | SNP (transition)   | 50.20% |          | 0      | RTX toxin CDS | RTX toxin | None         | KLI6996 8.1 |
| Variants: VaAres1_C_FDSW210055062-1r         | C | 986  | 986  | 1 | T -> C | 273 | SNP (transition)   | 51.30% |          | 0      | RTX toxin CDS | RTX toxin | Substitution | KLI6996 8.1 |
| Variants: VaAres1_C_FDSW210055062-1r         | T | 1019 | 1019 | 1 | C -> T | 270 | SNP (transition)   | 52.20% |          | 0      | RTX toxin CDS | RTX toxin | Substitution | KLI6996 8.1 |
| Variants: VaAres1_C_FDSW210055062-1r         | C | 1122 | 1122 | 1 | A -> C | 268 | SNP (transversion) | 51.50% |          | 0      | RTX toxin CDS | RTX toxin | None         | KLI6996 8.1 |
| Variants: VaAres1_C_FDSW210055062-1r         | A | 1159 | 1159 | 1 | G -> A | 279 | SNP (transition)   | 50.90% |          | 0      | RTX toxin CDS | RTX toxin | Substitution | KLI6996 8.1 |
| Variants: VaAres1_C_FDSW210055062-1r         | G | 1191 | 1191 | 1 | A -> G | 278 | SNP (transition)   | 48.20% |          | 0      | RTX toxin CDS | RTX toxin | None         | KLI6996 8.1 |
| Variants: VaAres1_C_FDSW210055062-1r         | T | 1323 | 1323 | 1 | C -> T | 278 | SNP (transition)   | 48.90% |          | 0      | RTX toxin CDS | RTX toxin | None         | KLI6996 8.1 |
| Variants: VaAres1_C_FDSW210055062-1r         | C | 1353 | 1353 | 1 | T -> C | 280 | SNP (transition)   | 46.40% |          | 0      | RTX toxin CDS | RTX toxin | None         | KLI6996 8.1 |
| Variants: VaAres1_C_FDSW210055062-1r         | T | 1418 | 1418 | 1 | C -> T | 250 | SNP (transition)   | 45.60% | #####    | S -> L | RTX toxin CDS | RTX toxin | Substitution | KLI6996 8.1 |
| Variants: VaAres1_C_FDSW210055062-1r         | G | 1425 | 1425 | 1 | A -> G | 244 | SNP (transition)   | 44.70% | #####    |        | RTX toxin CDS | RTX toxin | None         | KLI6996 8.1 |
| Variants: VaphiVaphiSt2_B_A_FDSW210055054-2r | G | 159  | 159  | 1 | T -> G | 201 | SNP (transversion) | 53.20% |          | 0      | RTX toxin CDS | RTX toxin | None         | KLI6996 8.1 |
| Variants: VaphiVaphiSt2_B_A_FDSW210055054-2r | G | 173  | 173  | 1 | A -> G | 204 | SNP (transition)   | 52.50% | 3.4E-315 | D -> G | RTX toxin CDS | RTX toxin | Substitution | KLI6996 8.1 |
| Variants: VaphiVaphiSt2_B_A_FDSW210055054-2r | A | 201  | 201  | 1 | G -> A | 197 | SNP (transition)   | 49.70% | #####    |        | RTX toxin CDS | RTX toxin | None         | KLI6996 8.1 |
| Variants: VaphiVaphiSt2_B_A_FDSW210055054-2r | G | 363  | 363  | 1 | A -> G | 214 | SNP (transition)   | 49.10% | #####    |        | RTX toxin CDS | RTX toxin | None         | KLI6996 8.1 |
| Variants: VaphiVaphiSt2_B_A_FDSW210055054-2r | G | 427  | 427  | 1 | A -> G | 226 | SNP (transition)   | 53.50% |          | 0      | RTX toxin CDS | RTX toxin | Substitution | KLI6996 8.1 |
| Variants: VaphiVaphiSt2_B_A_FDSW210055054-2r | C | 437  | 437  | 1 | T -> C | 220 | SNP (transition)   | 54.50% |          | 0      | RTX toxin CDS | RTX toxin | Substitution | KLI6996 8.1 |
| Variants: VaphiVaphiSt2_B_A_FDSW210055054-2r | G | 723  | 723  | 1 | A -> G | 184 | SNP (transition)   | 50.50% | #####    |        | RTX toxin CDS | RTX toxin | None         | KLI6996 8.1 |

|                                                  |   |      |      |   |        |     |                    |        |          |        |               |           |              |             |
|--------------------------------------------------|---|------|------|---|--------|-----|--------------------|--------|----------|--------|---------------|-----------|--------------|-------------|
| Variables:<br>VaphiVaphiSt2_B_A_FDSW210055054-2r | G | 728  | 728  | 1 | T -> G | 186 | SNP (transversion) | 51.10% | #####    | V -> G | RTX toxin CDS | RTX toxin | Substitution | KLI6996 8.1 |
| Variables:<br>VaphiVaphiSt2_B_A_FDSW210055054-2r | A | 745  | 745  | 1 | G -> A | 174 | SNP (transition)   | 50.00% | #####    | A -> T | RTX toxin CDS | RTX toxin | Substitution | KLI6996 8.1 |
| Variables:<br>VaphiVaphiSt2_B_A_FDSW210055054-2r | A | 840  | 840  | 1 | G -> A | 172 | SNP (transition)   | 51.20% | #####    |        | RTX toxin CDS | RTX toxin | None         | KLI6996 8.1 |
| Variables:<br>VaphiVaphiSt2_B_A_FDSW210055054-2r | C | 986  | 986  | 1 | T -> C | 180 | SNP (transition)   | 51.70% | #####    | I -> T | RTX toxin CDS | RTX toxin | Substitution | KLI6996 8.1 |
| Variables:<br>VaphiVaphiSt2_B_A_FDSW210055054-2r | T | 1019 | 1019 | 1 | C -> T | 183 | SNP (transition)   | 48.60% | #####    | T -> M | RTX toxin CDS | RTX toxin | Substitution | KLI6996 8.1 |
| Variables:<br>VaphiVaphiSt2_B_A_FDSW210055054-2r | C | 1122 | 1122 | 1 | A -> C | 211 | SNP (transversion) | 45.50% | #####    |        | RTX toxin CDS | RTX toxin | None         | KLI6996 8.1 |
| Variables:<br>VaphiVaphiSt2_B_A_FDSW210055054-2r | A | 1159 | 1159 | 1 | G -> A | 225 | SNP (transition)   | 46.70% | 1.7E-312 | A -> T | RTX toxin CDS | RTX toxin | Substitution | KLI6996 8.1 |
| Variables:<br>VaphiVaphiSt2_B_A_FDSW210055054-2r | G | 1191 | 1191 | 1 | A -> G | 227 | SNP (transition)   | 45.80% | 0.00E+00 |        | RTX toxin CDS | RTX toxin | None         | KLI6996 8.1 |
| Variables:<br>VaphiVaphiSt2_B_A_FDSW210055054-2r | T | 1323 | 1323 | 1 | C -> T | 168 | SNP (transition)   | 47.00% | #####    |        | RTX toxin CDS | RTX toxin | None         | KLI6996 8.1 |
| Variables:<br>VaphiVaphiSt2_B_A_FDSW210055054-2r | C | 1353 | 1353 | 1 | T -> C | 170 | SNP (transition)   | 47.60% | #####    |        | RTX toxin CDS | RTX toxin | None         | KLI6996 8.1 |
| Variables:<br>VaphiVaphiSt2_B_A_FDSW210055054-2r | T | 1418 | 1418 | 1 | C -> T | 157 | SNP (transition)   | 49.70% | #####    | S -> L | RTX toxin CDS | RTX toxin | Substitution | KLI6996 8.1 |
| Variables:<br>VaphiVaphiSt2_B_A_FDSW210055054-2r | G | 1425 | 1425 | 1 | A -> G | 148 | SNP (transition)   | 46.60% | #####    |        | RTX toxin CDS | RTX toxin | None         | KLI6996 8.1 |
| Variables:<br>VaphiSt2_B_FDSW210055056-1r        | G | 159  | 159  | 1 | T -> G | 382 | SNP (transversion) | 48.70% |          | 0      | RTX toxin CDS | RTX toxin | None         | KLI6996 8.1 |
| Variables:<br>VaphiSt2_B_FDSW210055056-1r        | G | 173  | 173  | 1 | A -> G | 374 | SNP (transition)   | 47.60% |          | 0      | RTX toxin CDS | RTX toxin | Substitution | KLI6996 8.1 |
| Variables:<br>VaphiSt2_B_FDSW210055056-1r        | A | 201  | 201  | 1 | G -> A | 386 | SNP (transition)   | 51.00% |          | 0      | RTX toxin CDS | RTX toxin | None         | KLI6996 8.1 |
| Variables:<br>VaphiSt2_B_FDSW210055056-1r        | G | 363  | 363  | 1 | A -> G | 431 | SNP (transition)   | 47.30% |          | 0      | RTX toxin CDS | RTX toxin | None         | KLI6996 8.1 |
| Variables:<br>VaphiSt2_B_FDSW210055056-1r        | G | 427  | 427  | 1 | A -> G | 420 | SNP (transition)   | 48.30% |          | 0      | RTX toxin CDS | RTX toxin | Substitution | KLI6996 8.1 |
| Variables:<br>VaphiSt2_B_FDSW210055056-1r        | C | 437  | 437  | 1 | T -> C | 411 | SNP (transition)   | 48.40% |          | 0      | RTX toxin CDS | RTX toxin | Substitution | KLI6996 8.1 |
| Variables:<br>VaphiSt2_B_FDSW210055056-1r        | G | 723  | 723  | 1 | A -> G | 398 | SNP (transition)   | 54.50% |          | 0      | RTX toxin CDS | RTX toxin | None         | KLI6996 8.1 |
| Variables:<br>VaphiSt2_B_FDSW210055056-1r        | G | 728  | 728  | 1 | T -> G | 392 | SNP (transversion) | 53.30% |          | 0      | RTX toxin CDS | RTX toxin | Substitution | KLI6996 8.1 |
| Variables:<br>VaphiSt2_B_FDSW210055056-1r        | A | 745  | 745  | 1 | G -> A | 389 | SNP (transition)   | 50.60% |          | 0      | RTX toxin CDS | RTX toxin | Substitution | KLI6996 8.1 |
| Variables:<br>VaphiSt2_B_FDSW210055056-1r        | A | 840  | 840  | 1 | A -> G | 416 | SNP (transition)   | 55.50% |          | 0      | RTX toxin CDS | RTX toxin | None         | KLI6996 8.1 |
| Variables:<br>VaphiSt2_B_FDSW210055056-1r        | C | 986  | 986  | 1 | T -> C | 370 | SNP (transition)   | 46.80% |          | 0      | RTX toxin CDS | RTX toxin | Substitution | KLI6996 8.1 |
| Variables:<br>VaphiSt2_B_FDSW210055056-1r        | T | 1019 | 1019 | 1 | C -> T | 391 | SNP (transition)   | 48.80% |          | 0      | RTX toxin CDS | RTX toxin | Substitution | KLI6996 8.1 |
| Variables:<br>VaphiSt2_B_FDSW210055056-1r        | C | 1122 | 1122 | 1 | A -> C | 400 | SNP (transversion) | 53.80% |          | 0      | RTX toxin CDS | RTX toxin | None         | KLI6996 8.1 |
| Variables:<br>VaphiSt2_B_FDSW210055056-1r        | A | 1159 | 1159 | 1 | G -> A | 380 | SNP (transition)   | 56.60% |          | 0      | RTX toxin CDS | RTX toxin | Substitution | KLI6996 8.1 |
| Variables:<br>VaphiSt2_B_FDSW210055056-1r        | G | 1191 | 1191 | 1 | A -> G | 387 | SNP (transition)   | 55.30% |          | 0      | RTX toxin CDS | RTX toxin | None         | KLI6996 8.1 |

|                                       |   |      |      |   |        |     |                  |        |   |        |               |           |              |             |
|---------------------------------------|---|------|------|---|--------|-----|------------------|--------|---|--------|---------------|-----------|--------------|-------------|
| Variants: VaphiSt2_B_FDSW210055056-Ir | T | 1323 | 1323 | 1 | C -> T | 434 | SNP (transition) | 46.50% | 0 |        | RTX toxin CDS | RTX toxin | None         | KLI6996 8.1 |
| Variants: VaphiSt2_B_FDSW210055056-Ir | C | 1353 | 1353 | 1 | T -> C | 418 | SNP (transition) | 44.70% | 0 |        | RTX toxin CDS | RTX toxin | None         | KLI6996 8.1 |
| Variants: VaphiSt2_B_FDSW210055056-Ir | T | 1418 | 1418 | 1 | C -> T | 351 | SNP (transition) | 47.60% | 0 | S -> L | RTX toxin CDS | RTX toxin | Substitution | KLI6996 8.1 |
| Variants: VaphiSt2_B_FDSW210055056-Ir | G | 1425 | 1425 | 1 | A -> G | 341 | SNP (transition) | 46.30% | 0 |        | RTX toxin CDS | RTX toxin | None         | KLI6996 8.1 |

## Contig 60

| Variant                                      | Name | Minimum | Maximum | Length | Change | Coverage | Polymorphism Type | Variant Frequency | Variant P-Value (approximate) |
|----------------------------------------------|------|---------|---------|--------|--------|----------|-------------------|-------------------|-------------------------------|
| Variants: VaAphrodite_A_FDSW210055057-2r     | C    | 98      | 98      | 1      | T -> C | 194      | SNP (transition)  | 42.30%            | 8.20E-199                     |
| Variants: VaAphrodite_B_FDSW210055058-2r     | C    | 98      | 98      | 1      | T -> C | 201      | SNP (transition)  | 37.30%            | 7.70E-177                     |
| Variants: VaAphrodite_C_FDSW210055059-1r     | C    | 98      | 98      | 1      | T -> C | 271      | SNP (transition)  | 40.20%            | 1.50E-271                     |
| Variants: VaAres1_A_FDSW210055060-2r         | C    | 98      | 98      | 1      | T -> C | 147      | SNP (transition)  | 33.30%            | 5.70E-123                     |
| Variants: VaAres1_B_FDSW210055061-2r         | C    | 98      | 98      | 1      | T -> C | 145      | SNP (transition)  | 38.60%            | 4.10E-139                     |
| Variants: VaAres1_C_FDSW210055062-1r         | C    | 98      | 98      | 1      | T -> C | 175      | SNP (transition)  | 34.30%            | 4.30E-145                     |
| Variants: VaphiVaphiSt2_B_A_FDSW210055054-2r | C    | 98      | 98      | 1      | T -> C | 145      | SNP (transition)  | 33.80%            | 1.60E-113                     |
| Variants: VaphiSt2_B_FDSW210055056-1r        | C    | 98      | 98      | 1      | T -> C | 332      | SNP (transition)  | 46.10%            | 0                             |

## Contig 62

| Variant                                      | Name | Minimum | Maximum | Length | Change   | Coverage | Polymorphism Type  | Variant Frequency | Variant P-Value (approximate) |
|----------------------------------------------|------|---------|---------|--------|----------|----------|--------------------|-------------------|-------------------------------|
| Variants: VaAphrodite_A_FDSW210055057-2r     | CG   | 2723    | 2724    | 2      | TT -> CG | 37       | Substitution       | 97.30%            | 3.70E-89                      |
| Variants: VaAphrodite_A_FDSW210055057-2r     | T    | 2728    | 2728    | 1      | C -> T   | 36       | SNP (transition)   | 100.00%           | 4.00E-87                      |
| Variants: VaAphrodite_A_FDSW210055057-2r     | T    | 2744    | 2744    | 1      | A -> T   | 28       | SNP (transversion) | 100.00%           | 2.50E-62                      |
| Variants: VaAphrodite_A_FDSW210055057-2r     | A    | 2747    | 2747    | 1      | G -> A   | 25       | SNP (transition)   | 100.00%           | 1.00E-50                      |
| Variants: VaAphrodite_B_FDSW210055058-2r     | CG   | 2723    | 2724    | 2      | TT -> CG | 55       | Substitution       | 100.00%           | 1.00E-143                     |
| Variants: VaAphrodite_B_FDSW210055058-2r     | T    | 2728    | 2728    | 1      | C -> T   | 50       | SNP (transition)   | 100.00%           | 1.00E-120                     |
| Variants: VaAphrodite_B_FDSW210055058-2r     | T    | 2744    | 2744    | 1      | A -> T   | 42       | SNP (transversion) | 100.00%           | 4.00E-93                      |
| Variants: VaAphrodite_B_FDSW210055058-2r     | A    | 2747    | 2747    | 1      | G -> A   | 39       | SNP (transition)   | 97.40%            | 6.10E-79                      |
| Variants: VaAphrodite_C_FDSW210055059-1r     | CG   | 2723    | 2724    | 2      | TT -> CG | 70 -> 72 | Substitution       | 100.00%           | 1.00E-168                     |
| Variants: VaAphrodite_C_FDSW210055059-1r     | T    | 2728    | 2728    | 1      | C -> T   | 67       | SNP (transition)   | 100.00%           | 7.90E-155                     |
| Variants: VaAphrodite_C_FDSW210055059-1r     | T    | 2744    | 2744    | 1      | A -> T   | 61       | SNP (transversion) | 100.00%           | 6.30E-135                     |
| Variants: VaAphrodite_C_FDSW210055059-1r     | A    | 2747    | 2747    | 1      | G -> A   | 60       | SNP (transition)   | 100.00%           | 1.00E-132                     |
| Variants: VaAres1_A_FDSW210055060-2r         | CG   | 2723    | 2724    | 2      | TT -> CG | 22       | Substitution       | 95.50%            | 6.90E-52                      |
| Variants: VaAres1_A_FDSW210055060-2r         | T    | 2728    | 2728    | 1      | C -> T   | 19       | SNP (transition)   | 100.00%           | 2.50E-46                      |
| Variants: VaAres1_A_FDSW210055060-2r         | T    | 2744    | 2744    | 1      | A -> T   | 10       | SNP (transversion) | 100.00%           | 1.00E-22                      |
| Variants: VaAres1_A_FDSW210055060-2r         | A    | 2747    | 2747    | 1      | G -> A   | 10       | SNP (transition)   | 100.00%           | 1.00E-21                      |
| Variants: VaAres1_B_FDSW210055061-2r         | CG   | 2723    | 2724    | 2      | TT -> CG | 55 -> 56 | Substitution       | 98.20%            | 5.60E-175                     |
| Variants: VaAres1_B_FDSW210055061-2r         | T    | 2728    | 2728    | 1      | C -> T   | 52       | SNP (transition)   | 100.00%           | 1.60E-151                     |
| Variants: VaAres1_B_FDSW210055061-2r         | T    | 2744    | 2744    | 1      | A -> T   | 39       | SNP (transversion) | 100.00%           | 6.30E-110                     |
| Variants: VaAres1_B_FDSW210055061-2r         | A    | 2747    | 2747    | 1      | G -> A   | 39       | SNP (transition)   | 100.00%           | 5.00E-106                     |
| Variants: VaAres1_C_FDSW210055062-1r         | CG   | 2723    | 2724    | 2      | TT -> CG | 54       | Substitution       | 98.10%            | 8.50E-137                     |
| Variants: VaAres1_C_FDSW210055062-1r         | T    | 2728    | 2728    | 1      | C -> T   | 46       | SNP (transition)   | 97.80%            | 4.60E-98                      |
| Variants: VaAres1_C_FDSW210055062-1r         | T    | 2744    | 2744    | 1      | A -> T   | 37       | SNP (transversion) | 100.00%           | 2.00E-78                      |
| Variants: VaAres1_C_FDSW210055062-1r         | A    | 2747    | 2747    | 1      | G -> A   | 37       | SNP (transition)   | 100.00%           | 1.00E-74                      |
| Variants: VaphiVaphiSt2_B_A_FDSW210055054-2r | CG   | 2723    | 2724    | 2      | TT -> CG | 57 -> 60 | Substitution       | 100.00%           | 2.50E-160                     |
| Variants: VaphiVaphiSt2_B_A_FDSW210055054-2r | T    | 2728    | 2728    | 1      | C -> T   | 55       | SNP (transition)   | 100.00%           | 1.00E-154                     |
| Variants: VaphiVaphiSt2_B_A_FDSW210055054-2r | T    | 2744    | 2744    | 1      | A -> T   | 39       | SNP (transversion) | 100.00%           | 2.50E-94                      |
| Variants: VaphiVaphiSt2_B_A_FDSW210055054-2r | A    | 2747    | 2747    | 1      | G -> A   | 36       | SNP (transition)   | 100.00%           | 4.00E-87                      |
| Variants: VaphiSt2_B_FDSW210055056-1r        | CG   | 2723    | 2724    | 2      | TT -> CG | 86 -> 90 | Substitution       | 100.00%           | 2.50E-224                     |

|                                       |   |      |      |   |        |    |                    |         |           |
|---------------------------------------|---|------|------|---|--------|----|--------------------|---------|-----------|
| Variants: VaphiSt2_B_FDSW210055056-1r | T | 2728 | 2728 | 1 | C -> T | 76 | SNP (transition)   | 100.00% | 4.00E-183 |
| Variants: VaphiSt2_B_FDSW210055056-1r | T | 2744 | 2744 | 1 | A -> T | 61 | SNP (transversion) | 100.00% | 7.90E-129 |
| Variants: VaphiSt2_B_FDSW210055056-1r | A | 2747 | 2747 | 1 | G -> A | 58 | SNP (transition)   | 100.00% | 2.50E-128 |

## Contig 63

| Variant                                        | Name | Minimum | Maximum | Length | Change | Coverage | Polymorphism Type  | Variant Frequency | Variant P-Value (approximate) | Amino Acid Change | CDS                      | product              | Protein Effect | protein_id  |
|------------------------------------------------|------|---------|---------|--------|--------|----------|--------------------|-------------------|-------------------------------|-------------------|--------------------------|----------------------|----------------|-------------|
| Variant:<br>VaAphrodite_A_FDSW210055057-2r     | C    | 3       | 3       | 1      | A -> C | 80       | (transversion) SNP | 98.80%            | 2.00E-267                     | K -> Q            | hypothetical protein CDS | hypothetical protein | Substitution   | KLI6989 9.1 |
| Variant:<br>VaAphrodite_B_FDSW210055058-2r     | C    | 3       | 3       | 1      | A -> C | 52       | (transversion) SNP | 96.20%            | 1.30E-167                     | K -> Q            | hypothetical protein CDS | hypothetical protein | Substitution   | KLI6989 9.1 |
| Variant:<br>VaAphrodite_C_FDSW210055059-1r     | C    | 3       | 3       | 1      | A -> C | 108      | (transversion) SNP | 98.10%            | 0                             | K -> Q            | hypothetical protein CDS | hypothetical protein | Substitution   | KLI6989 9.1 |
| Variant:<br>VaAres1_A_FDSW210055060-2r         | C    | 3       | 3       | 1      | A -> C | 58       | (transversion) SNP | 96.60%            | 1.70E-193                     | K -> Q            | hypothetical protein CDS | hypothetical protein | Substitution   | KLI6989 9.1 |
| Variant:<br>VaAres1_B_FDSW210055061-2r         | C    | 3       | 3       | 1      | A -> C | 58       | (transversion) SNP | 94.80%            | 3.10E-172                     | K -> Q            | hypothetical protein CDS | hypothetical protein | Substitution   | KLI6989 9.1 |
| Variant:<br>VaAres1_C_FDSW210055062-1r         | C    | 3       | 3       | 1      | A -> C | 83       | (transversion) SNP | 97.60%            | 1.40E-272                     | K -> Q            | hypothetical protein CDS | hypothetical protein | Substitution   | KLI6989 9.1 |
| Variant:<br>VaphiVaphiSt2_B_A_FDSW210055054-2r | C    | 3       | 3       | 1      | A -> C | 63       | (transversion) SNP | 98.40%            | 1.60E-203                     | K -> Q            | hypothetical protein CDS | hypothetical protein | Substitution   | KLI6989 9.1 |
| Variant:<br>VaphiSt2_B_FDSW210055056-1r        | C    | 3       | 3       | 1      | A -> C | 119      | (transversion) SNP | 97.50%            | 0                             | K -> Q            | hypothetical protein CDS | hypothetical protein | Substitution   | KLI6989 9.1 |

## Contig 64

| Variant                                      | Name | Minimum | Maximum | Length | Change | Coverage | Polymorphism Type | Variant Frequency | Variant P-Value (approximate) |
|----------------------------------------------|------|---------|---------|--------|--------|----------|-------------------|-------------------|-------------------------------|
| Variants: VaAres1_C_FDSW210055062-1r         | C    | 4910    | 4910    | 1      | T -> C | 213      | SNP (transition)  | 25.80%            | 3.70E-114                     |
| Variants: VaphiVaphiSt2_B_A_FDSW210055054-2r | A    | 4892    | 4892    | 1      | G -> A | 178      | SNP (transition)  | 25.30%            | 2.90E-84                      |
| Variants: VaphiVaphiSt2_B_A_FDSW210055054-2r | C    | 4910    | 4910    | 1      | T -> C | 197      | SNP (transition)  | 26.90%            | 3.70E-111                     |



## Contig 65

| Variant                                      | Name | Minimum | Maximum | Length | Change | Coverage | Polymorphism Type  | Variant Frequency | Variant P-Value (approximate) |
|----------------------------------------------|------|---------|---------|--------|--------|----------|--------------------|-------------------|-------------------------------|
| Variants: VaAphrodite_B_FDSW210055058-2r     | C    | 6681    | 6681    | 1      | T -> C | 94       | SNP (transition)   | 26.60%            | 4.00E-63                      |
| Variants: VaAphrodite_B_FDSW210055058-2r     | T    | 6686    | 6686    | 1      | A -> T | 100      | SNP (transversion) | 29.00%            | 1.50E-65                      |
| Variants: VaAphrodite_B_FDSW210055058-2r     | A    | 6690    | 6689    | 0      | #NAME? | 101      | Insertion          | 29.70%            | 4.00E-68                      |
| Variants: VaAres1_A_FDSW210055060-2r         | C    | 6775    | 6775    | 1      | T -> C | 17       | SNP (transition)   | 29.40%            | 2.00E-15                      |
| Variants: VaAres1_B_FDSW210055061-2r         | C    | 6775    | 6775    | 1      | T -> C | 38       | SNP (transition)   | 28.90%            | 2.40E-32                      |
| Variants: VaphiVaphiSt2_B_A_FDSW210055054-2r | C    | 6775    | 6775    | 1      | T -> C | 48       | SNP (transition)   | 35.40%            | 2.70E-49                      |

## Contig 66

| Variant                                  | Name | Minimum | Maximum | Length | Change   | Coverage   | Polymorphism Type  | Variant Frequency | Variant P-Value (approximate) |
|------------------------------------------|------|---------|---------|--------|----------|------------|--------------------|-------------------|-------------------------------|
| Variants: VaAphrodite_A_FDSW210055057-2r | AC   | 1609    | 1610    | 2      | GA -> AC | 135        | Substitution       | 100.00%           | 0                             |
| Variants: VaAphrodite_A_FDSW210055057-2r | A    | 1612    | 1612    | 1      | C -> A   | 134        | SNP (transversion) | 100.00%           | 0                             |
| Variants: VaAphrodite_A_FDSW210055057-2r | T    | 1614    | 1614    | 1      | A -> T   | 133        | SNP (transversion) | 100.00%           | 0                             |
| Variants: VaAphrodite_A_FDSW210055057-2r | T    | 1616    | 1616    | 1      | C -> T   | 130        | SNP (transition)   | 100.00%           | 0                             |
| Variants: VaAphrodite_A_FDSW210055057-2r | A    | 1618    | 1618    | 1      | G -> A   | 131        | SNP (transition)   | 100.00%           | 0                             |
| Variants: VaAphrodite_A_FDSW210055057-2r | C    | 1620    | 1620    | 1      | T -> C   | 133        | SNP (transition)   | 100.00%           | 0                             |
| Variants: VaAphrodite_B_FDSW210055058-2r | AC   | 1609    | 1610    | 2      | GA -> AC | 116 -> 117 | Substitution       | 100.00%           | 0                             |
| Variants: VaAphrodite_B_FDSW210055058-2r | A    | 1612    | 1612    | 1      | C -> A   | 118        | SNP (transversion) | 100.00%           | 0                             |
| Variants: VaAphrodite_B_FDSW210055058-2r | T    | 1614    | 1614    | 1      | A -> T   | 121        | SNP (transversion) | 100.00%           | 0                             |
| Variants: VaAphrodite_B_FDSW210055058-2r | T    | 1616    | 1616    | 1      | C -> T   | 120        | SNP (transition)   | 100.00%           | 0                             |
| Variants: VaAphrodite_B_FDSW210055058-2r | A    | 1618    | 1618    | 1      | G -> A   | 119        | SNP (transition)   | 100.00%           | 0                             |
| Variants: VaAphrodite_B_FDSW210055058-2r | C    | 1620    | 1620    | 1      | T -> C   | 119        | SNP (transition)   | 100.00%           | 0                             |
| Variants: VaAphrodite_C_FDSW210055059-1r | AC   | 1609    | 1610    | 2      | GA -> AC | 167        | Substitution       | 100.00%           | 0                             |
| Variants: VaAphrodite_C_FDSW210055059-1r | A    | 1612    | 1612    | 1      | C -> A   | 168        | SNP (transversion) | 100.00%           | 0                             |
| Variants: VaAphrodite_C_FDSW210055059-1r | T    | 1614    | 1614    | 1      | A -> T   | 163        | SNP (transversion) | 100.00%           | 0                             |
| Variants: VaAphrodite_C_FDSW210055059-1r | T    | 1616    | 1616    | 1      | C -> T   | 163        | SNP (transition)   | 100.00%           | 0                             |
| Variants: VaAphrodite_C_FDSW210055059-1r | A    | 1618    | 1618    | 1      | G -> A   | 166        | SNP (transition)   | 100.00%           | 0                             |
| Variants: VaAphrodite_C_FDSW210055059-1r | C    | 1620    | 1620    | 1      | T -> C   | 163        | SNP (transition)   | 100.00%           | 0                             |
| Variants: VaAres1_A_FDSW210055060-2r     | AC   | 1609    | 1610    | 2      | GA -> AC | 83 -> 86   | Substitution       | 98.80%            | 8.30E-286                     |
| Variants: VaAres1_A_FDSW210055060-2r     | A    | 1612    | 1612    | 1      | C -> A   | 84         | SNP (transversion) | 100.00%           | 4.00E-261                     |
| Variants: VaAres1_A_FDSW210055060-2r     | T    | 1614    | 1614    | 1      | A -> T   | 82         | SNP (transversion) | 100.00%           | 1.00E-287                     |
| Variants: VaAres1_A_FDSW210055060-2r     | T    | 1616    | 1616    | 1      | C -> T   | 81         | SNP (transition)   | 98.80%            | 8.10E-271                     |
| Variants: VaAres1_A_FDSW210055060-2r     | A    | 1618    | 1618    | 1      | G -> A   | 81         | SNP (transition)   | 100.00%           | 3.20E-284                     |
| Variants: VaAres1_A_FDSW210055060-2r     | C    | 1620    | 1620    | 1      | T -> C   | 80         | SNP (transition)   | 100.00%           | 1.00E-280                     |
| Variants: VaAres1_B_FDSW210055061-2r     | AC   | 1609    | 1610    | 2      | GA -> AC | 100 -> 102 | Substitution       | 100.00%           | 0                             |
| Variants: VaAres1_B_FDSW210055061-2r     | A    | 1612    | 1612    | 1      | C -> A   | 100        | SNP (transversion) | 100.00%           | 0                             |
| Variants: VaAres1_B_FDSW210055061-2r     | T    | 1614    | 1614    | 1      | A -> T   | 100        | SNP (transversion) | 99.00%            | 0                             |
| Variants: VaAres1_B_FDSW210055061-2r     | T    | 1616    | 1616    | 1      | C -> T   | 101        | SNP (transition)   | 100.00%           | 0                             |
| Variants: VaAres1_B_FDSW210055061-2r     | A    | 1618    | 1618    | 1      | G -> A   | 100        | SNP (transition)   | 100.00%           | 0                             |

|                                              |    |      |      |   |          |            |                    |                |   |
|----------------------------------------------|----|------|------|---|----------|------------|--------------------|----------------|---|
| Variants: VaAres1_B_FDSW210055061-2r         | C  | 1620 | 1620 | 1 | T -> C   | 99         | SNP (transition)   | 100.00%        | 0 |
| Variants: VaAres1_C_FDSW210055062-1r         | AC | 1609 | 1610 | 2 | GA -> AC | 117 -> 118 | Substitution       | 99.1% -> 99.2% | 0 |
| Variants: VaAres1_C_FDSW210055062-1r         | A  | 1612 | 1612 | 1 | C -> A   | 117        | SNP (transversion) | 100.00%        | 0 |
| Variants: VaAres1_C_FDSW210055062-1r         | T  | 1614 | 1614 | 1 | A -> T   | 117        | SNP (transversion) | 99.10%         | 0 |
| Variants: VaAres1_C_FDSW210055062-1r         | T  | 1616 | 1616 | 1 | C -> T   | 119        | SNP (transition)   | 100.00%        | 0 |
| Variants: VaAres1_C_FDSW210055062-1r         | A  | 1618 | 1618 | 1 | G -> A   | 121        | SNP (transition)   | 99.20%         | 0 |
| Variants: VaAres1_C_FDSW210055062-1r         | C  | 1620 | 1620 | 1 | T -> C   | 123        | SNP (transition)   | 99.20%         | 0 |
| Variants: VaphiVaphiSt2_B_A_FDSW210055054-2r | AC | 1609 | 1610 | 2 | GA -> AC | 116 -> 118 | Substitution       | 100.00%        | 0 |
| Variants: VaphiVaphiSt2_B_A_FDSW210055054-2r | A  | 1612 | 1612 | 1 | C -> A   | 118        | SNP (transversion) | 99.20%         | 0 |
| Variants: VaphiVaphiSt2_B_A_FDSW210055054-2r | T  | 1614 | 1614 | 1 | A -> T   | 118        | SNP (transversion) | 98.30%         | 0 |
| Variants: VaphiVaphiSt2_B_A_FDSW210055054-2r | T  | 1616 | 1616 | 1 | C -> T   | 119        | SNP (transition)   | 100.00%        | 0 |
| Variants: VaphiVaphiSt2_B_A_FDSW210055054-2r | A  | 1618 | 1618 | 1 | G -> A   | 118        | SNP (transition)   | 99.20%         | 0 |
| Variants: VaphiVaphiSt2_B_A_FDSW210055054-2r | C  | 1620 | 1620 | 1 | T -> C   | 119        | SNP (transition)   | 100.00%        | 0 |
| Variants: VaphiSt2_B_FDSW210055056-1r        | AC | 1609 | 1610 | 2 | GA -> AC | 202 -> 203 | Substitution       | 99.50%         | 0 |
| Variants: VaphiSt2_B_FDSW210055056-1r        | A  | 1612 | 1612 | 1 | C -> A   | 202        | SNP (transversion) | 100.00%        | 0 |
| Variants: VaphiSt2_B_FDSW210055056-1r        | T  | 1614 | 1614 | 1 | A -> T   | 203        | SNP (transversion) | 100.00%        | 0 |
| Variants: VaphiSt2_B_FDSW210055056-1r        | T  | 1616 | 1616 | 1 | C -> T   | 200        | SNP (transition)   | 100.00%        | 0 |
| Variants: VaphiSt2_B_FDSW210055056-1r        | A  | 1618 | 1618 | 1 | G -> A   | 200        | SNP (transition)   | 100.00%        | 0 |
| Variants: VaphiSt2_B_FDSW210055056-1r        | C  | 1620 | 1620 | 1 | T -> C   | 201        | SNP (transition)   | 100.00%        | 0 |

## Contig 68

| Variant<br>Variants:                            | Name | Mini<br>mum | Maxi<br>mum | Len<br>gth | Change   | Cover<br>age | Polymorphism<br>Type  | Variant<br>Frequency | Variant P-Value<br>(approximate) | Amino Acid<br>Change | CDS | product | Protein<br>Effect | protein<br>_id |
|-------------------------------------------------|------|-------------|-------------|------------|----------|--------------|-----------------------|----------------------|----------------------------------|----------------------|-----|---------|-------------------|----------------|
| VaAphrodite_A_FDSW210055<br>057-2r<br>Variants: | T    | 79          | 79          | 1          | C -> T   | 68           | SNP<br>(transition)   | 82.40%               | 4.50E-139                        |                      |     |         |                   |                |
| VaAphrodite_A_FDSW210055<br>057-2r<br>Variants: | GG   | 80          | 81          | 2          | CT -> GG | 60 -><br>65  | Substitution          | 67.7% -><br>68.3%    | 4.90E-92                         |                      |     |         |                   |                |
| VaAphrodite_A_FDSW210055<br>057-2r<br>Variants: | G    | 84          | 84          | 1          | A -> G   | 46           | SNP<br>(transition)   | 80.40%               | 8.40E-77                         |                      |     |         |                   |                |
| VaAphrodite_A_FDSW210055<br>057-2r<br>Variants: | G    | 86          | 86          | 1          | C -> G   | 39           | SNP<br>(transversion) | 59.00%               | 1.10E-47                         |                      |     |         |                   |                |
| VaAphrodite_A_FDSW210055<br>057-2r<br>Variants: | G    | 87          | 87          | 1          | A -> G   | 39           | SNP<br>(transition)   | 59.00%               | 2.20E-45                         |                      |     |         |                   |                |
| VaAphrodite_A_FDSW210055<br>057-2r<br>Variants: | GG   | 88          | 89          | 2          | TC -> GG | 37 -><br>39  | Substitution          | 35.1% -><br>46.2%    | 2.70E-26                         |                      |     |         |                   |                |
| VaAphrodite_A_FDSW210055<br>057-2r<br>Variants: | G    | 96          | 96          | 1          | T -> G   | 55           | SNP<br>(transversion) | 27.30%               | 2.30E-16                         |                      |     |         |                   |                |
| VaAphrodite_A_FDSW210055<br>057-2r<br>Variants: | C    | 102         | 102         | 1          | T -> C   | 76           | SNP<br>(transition)   | 34.20%               | 3.70E-25                         |                      |     |         |                   |                |
| VaAphrodite_A_FDSW210055<br>057-2r<br>Variants: | T    | 108         | 108         | 1          | A -> T   | 105          | SNP<br>(transversion) | 28.60%               | 1.50E-64                         |                      |     |         |                   |                |
| VaAphrodite_A_FDSW210055<br>057-2r<br>Variants: | G    | 120         | 120         | 1          | A -> G   | 146          | SNP<br>(transition)   | 30.80%               | 4.50E-40                         |                      |     |         |                   |                |
| VaAphrodite_A_FDSW210055<br>057-2r<br>Variants: | T    | 126         | 126         | 1          | C -> T   | 171          | SNP<br>(transition)   | 25.70%               | 2.00E-35                         |                      |     |         |                   |                |
| VaAphrodite_A_FDSW210055<br>057-2r<br>Variants: | T    | 129         | 129         | 1          | C -> T   | 182          | SNP<br>(transition)   | 59.30%               | 1.20E-218                        |                      |     |         |                   |                |
| VaAphrodite_A_FDSW210055<br>057-2r<br>Variants: | G    | 132         | 132         | 1          | C -> G   | 197          | SNP<br>(transversion) | 48.20%               | 8.60E-209                        |                      |     |         |                   |                |
| VaAphrodite_A_FDSW210055<br>057-2r<br>Variants: | T    | 144         | 144         | 1          | C -> T   | 239          | SNP<br>(transition)   | 27.20%               | 5.70E-72                         |                      |     |         |                   |                |
| VaAphrodite_A_FDSW210055<br>057-2r<br>Variants: | G    | 153         | 153         | 1          | A -> G   | 280          | SNP<br>(transition)   | 27.90%               | 2.70E-195                        |                      |     |         |                   |                |
| VaAphrodite_A_FDSW210055<br>057-2r<br>Variants: | A    | 159         | 159         | 1          | G -> A   | 305          | SNP<br>(transition)   | 65.20%               | 0                                |                      |     |         |                   |                |
| VaAphrodite_A_FDSW210055<br>057-2r<br>Variants: | A    | 165         | 165         | 1          | T -> A   | 329          | SNP<br>(transversion) | 41.30%               | 1.50E-272                        |                      |     |         |                   |                |
| VaAphrodite_A_FDSW210055<br>057-2r<br>Variants: | A    | 183         | 183         | 1          | G -> A   | 434          | SNP<br>(transition)   | 29.50%               | 3.70E-259                        |                      |     |         |                   |                |
| VaAphrodite_A_FDSW210055<br>057-2r<br>Variants: | A    | 192         | 192         | 1          | G -> A   | 479          | SNP<br>(transition)   | 48.00%               | 0                                |                      |     |         |                   |                |
| VaAphrodite_A_FDSW210055<br>057-2r              | A    | 201         | 201         | 1          | G -> A   | 524          | SNP<br>(transition)   | 28.60%               | 4.9E-316                         |                      |     |         |                   |                |

|                    |      |     |     |   |        |        |   |
|--------------------|------|-----|-----|---|--------|--------|---|
| SNP                | 592  | 216 | 216 | 1 | A -> G | 34.50% | 0 |
| SNP (transition)   | 592  | 216 | 216 | 1 | A -> G | 34.50% | 0 |
| SNP                | 623  | 225 | 225 | 1 | A -> C | 25.80% | 0 |
| SNP (transversion) | 623  | 225 | 225 | 1 | A -> C | 25.80% | 0 |
| SNP                | 623  | 225 | 225 | 1 | A -> T | 33.50% | 0 |
| SNP (transversion) | 623  | 225 | 225 | 1 | A -> T | 33.50% | 0 |
| SNP                | 625  | 227 | 227 | 1 | C -> T | 29.30% | 0 |
| SNP (transition)   | 625  | 227 | 227 | 1 | C -> T | 29.30% | 0 |
| SNP                | 653  | 239 | 239 | 1 | C -> T | 28.20% | 0 |
| SNP (transition)   | 653  | 239 | 239 | 1 | C -> T | 28.20% | 0 |
| SNP                | 652  | 240 | 240 | 1 | T -> C | 31.90% | 0 |
| SNP (transition)   | 652  | 240 | 240 | 1 | T -> C | 31.90% | 0 |
| SNP                | 703  | 294 | 294 | 1 | G -> A | 44.40% | 0 |
| SNP (transition)   | 703  | 294 | 294 | 1 | G -> A | 44.40% | 0 |
| SNP                | 729  | 303 | 303 | 1 | T -> A | 27.20% | 0 |
| SNP (transversion) | 729  | 303 | 303 | 1 | T -> A | 27.20% | 0 |
| SNP                | 743  | 306 | 306 | 1 | A -> G | 26.90% | 0 |
| SNP (transition)   | 743  | 306 | 306 | 1 | A -> G | 26.90% | 0 |
| SNP                | 774  | 315 | 315 | 1 | G -> A | 25.30% | 0 |
| SNP (transition)   | 774  | 315 | 315 | 1 | G -> A | 25.30% | 0 |
| SNP                | 901  | 357 | 357 | 1 | G -> A | 49.40% | 0 |
| SNP (transition)   | 901  | 357 | 357 | 1 | G -> A | 49.40% | 0 |
| SNP                | 929  | 363 | 363 | 1 | A -> G | 53.10% | 0 |
| SNP (transition)   | 929  | 363 | 363 | 1 | A -> G | 53.10% | 0 |
| SNP                | 953  | 369 | 369 | 1 | T -> C | 83.70% | 0 |
| SNP (transition)   | 953  | 369 | 369 | 1 | T -> C | 83.70% | 0 |
| SNP                | 956  | 371 | 371 | 1 | G -> A | 56.10% | 0 |
| SNP (transition)   | 956  | 371 | 371 | 1 | G -> A | 56.10% | 0 |
| SNP                | 1062 | 387 | 387 | 1 | C -> G | 58.60% | 0 |
| SNP (transversion) | 1062 | 387 | 387 | 1 | C -> G | 58.60% | 0 |
| SNP                | 1095 | 393 | 393 | 1 | G -> C | 49.40% | 0 |
| SNP (transversion) | 1095 | 393 | 393 | 1 | G -> C | 49.40% | 0 |
| SNP                | 1116 | 396 | 396 | 1 | A -> C | 34.80% | 0 |
| SNP (transversion) | 1116 | 396 | 396 | 1 | A -> C | 34.80% | 0 |
| SNP                | 1222 | 420 | 420 | 1 | A -> G | 31.50% | 0 |
| SNP (transition)   | 1222 | 420 | 420 | 1 | A -> G | 31.50% | 0 |
| SNP                | 1222 | 420 | 420 | 1 | A -> T | 35.40% | 0 |
| SNP (transversion) | 1222 | 420 | 420 | 1 | A -> T | 35.40% | 0 |
| SNP                | 1219 | 422 | 422 | 1 | T -> A | 35.30% | 0 |
| SNP (transversion) | 1219 | 422 | 422 | 1 | T -> A | 35.30% | 0 |
| SNP                | 1222 | 423 | 423 | 1 | G -> A | 65.60% | 0 |
| SNP (transition)   | 1222 | 423 | 423 | 1 | G -> A | 65.60% | 0 |
| SNP                | 1226 | 426 | 426 | 1 | G -> A | 64.80% | 0 |
| SNP (transition)   | 1226 | 426 | 426 | 1 | G -> A | 64.80% | 0 |

|           |              |                |           |
|-----------|--------------|----------------|-----------|
| SNP       | 1261         | 49.70%         | 0         |
| SNP       | 1255         | 47.80%         | 0         |
| SNP       | 1246         | 42.10%         | 0         |
| SNP       | 1209         | 27.50%         | 0         |
| SNP       | 1182         | 50.20%         | 0         |
| SNP       | 1178         | 32.90%         | 0         |
| SNP       | 1200         | 29.90%         | 0         |
| SNP       | 1177         | 56.40%         | 0         |
| SNP       | 1167         | 36.50%         | 0         |
| SNP       | 1124         | 34.50%         | 0         |
| SNP       | 1108         | 30.10%         | 0         |
| SNP       | 1037         | 39.50%         | 0         |
| SNP       | 568          | 63.70%         | 0         |
| SNP       | 424          | 63.00%         | 0         |
| SNP       | 372          | 56.50%         | 0         |
| SNP       | 354          | 56.50%         | 0         |
| SNP       | 340          | 57.90%         | 0         |
| SNP       | 321          | 57.60%         | 0         |
| SNP       | 227          | 55.10%         | 0         |
| SNP       | 128          | 62.50%         | 4.10E-197 |
| SNP       | 113          | 61.90%         | 3.00E-186 |
| 97 -> 101 | Substitution | 32.7% -> 40.4% | 5.90E-60  |

|                                                  |     |      |      |   |            |               |                       |                   |           |        |                             |                          |                   |                |
|--------------------------------------------------|-----|------|------|---|------------|---------------|-----------------------|-------------------|-----------|--------|-----------------------------|--------------------------|-------------------|----------------|
| Variables:<br>VaAphrodite_A_FDSW210055<br>057-2r | A   | 744  | 743  | 0 | #NAME?     | 90            | Insertion             | 31.10%            | 8.50E-34  |        |                             |                          |                   |                |
| Variables:<br>VaAphrodite_A_FDSW210055<br>057-2r | GAC | 744  | 746  | 3 | AGA -> GAC | 93 -><br>95   | Substitution          | 84.2% -><br>92.5% | 1.10E-191 |        |                             |                          |                   |                |
| Variables:<br>VaAphrodite_A_FDSW210055<br>057-2r | C   | 750  | 750  | 1 | A -> C     | 94            | SNP<br>(transversion) | 36.20%            | 6.80E-84  |        |                             |                          |                   |                |
| Variables:<br>VaAphrodite_A_FDSW210055<br>057-2r | C   | 756  | 756  | 1 | G -> C     | 101           | SNP<br>(transversion) | 48.50%            | 2.30E-123 |        |                             |                          |                   |                |
| Variables:<br>VaAphrodite_A_FDSW210055<br>057-2r | A   | 768  | 768  | 1 | T -> A     | 162           | SNP<br>(transversion) | 52.50%            | 8.90E-217 |        |                             |                          |                   |                |
| Variables:<br>VaAphrodite_A_FDSW210055<br>057-2r | A   | 795  | 795  | 1 | G -> A     | 329           | SNP<br>(transition)   | 53.50%            | 0         | A -> T | hypothetical<br>protein CDS | hypothetica<br>l protein | Substituti<br>on  | KLI69<br>879.1 |
| Variables:<br>VaAphrodite_A_FDSW210055<br>057-2r | AAT | 801  | 803  | 2 | CAC -> AAT | 374 -><br>393 | Substitution          | 72.2% -><br>72.3% | 0         | H -> N | hypothetical<br>protein CDS | hypothetica<br>l protein | Substituti<br>on  | KLI69<br>879.1 |
| Variables:<br>VaAphrodite_A_FDSW210055<br>057-2r | C   | 834  | 834  | 1 | T -> C     | 567           | SNP<br>(transition)   | 73.40%            | 0         | Y -> H | hypothetical<br>protein CDS | hypothetica<br>l protein | Substituti<br>on  | KLI69<br>879.1 |
| Variables:<br>VaAphrodite_A_FDSW210055<br>057-2r | G   | 888  | 888  | 1 | A -> G     | 781           | SNP<br>(transition)   | 28.30%            | 0         | I -> V | hypothetical<br>protein CDS | hypothetica<br>l protein | Substituti<br>on  | KLI69<br>879.1 |
| Variables:<br>VaAphrodite_A_FDSW210055<br>057-2r | C   | 897  | 897  | 1 | T -> C     | 796           | SNP<br>(transition)   | 59.70%            | 0         | C -> R | hypothetical<br>protein CDS | hypothetica<br>l protein | Substituti<br>on  | KLI69<br>879.1 |
| Variables:<br>VaAphrodite_A_FDSW210055<br>057-2r | C   | 900  | 900  | 1 | G -> C     | 800           | SNP<br>(transversion) | 60.10%            | 0         | D -> H | hypothetical<br>protein CDS | hypothetica<br>l protein | Substituti<br>on  | KLI69<br>879.1 |
| Variables:<br>VaAphrodite_A_FDSW210055<br>057-2r | C   | 942  | 942  | 1 | G -> C     | 797           | SNP<br>(transversion) | 31.50%            | 0         | G -> R | hypothetical<br>protein CDS | hypothetica<br>l protein | Substiituti<br>on | KLI69<br>879.1 |
| Variables:<br>VaAphrodite_A_FDSW210055<br>057-2r | TGT | 966  | 968  | 2 | AGC -> TGT | 775 -><br>776 | Substitution          | 49.0% -><br>50.1% | 0         | S -> C | hypothetical<br>protein CDS | hypothetica<br>l protein | Substituti<br>on  | KLI69<br>879.1 |
| Variables:<br>VaAphrodite_A_FDSW210055<br>057-2r | G   | 969  | 969  | 1 | C -> G     | 774           | SNP<br>(transversion) | 35.40%            | 0         | P -> A | hypothetical<br>protein CDS | hypothetica<br>l protein | Substituti<br>on  | KLI69<br>879.1 |
| Variables:<br>VaAphrodite_A_FDSW210055<br>057-2r | A   | 976  | 976  | 1 | T -> A     | 773           | SNP<br>(transversion) | 37.00%            | 0         | V -> E | hypothetical<br>protein CDS | hypothetica<br>l protein | Substituti<br>on  | KLI69<br>879.1 |
| Variables:<br>VaAphrodite_A_FDSW210055<br>057-2r | A   | 1008 | 1008 | 1 | G -> A     | 746           | SNP<br>(transition)   | 41.20%            | 0         | V -> I | hypothetical<br>protein CDS | hypothetica<br>l protein | Substituti<br>on  | KLI69<br>879.1 |
| Variables:<br>VaAphrodite_A_FDSW210055<br>057-2r | C   | 1035 | 1035 | 1 | G -> C     | 768           | SNP<br>(transversion) | 32.00%            | 0         | G -> R | hypothetical<br>protein CDS | hypothetica<br>l protein | Substituti<br>on  | KLI69<br>879.1 |
| Variables:<br>VaAphrodite_A_FDSW210055<br>057-2r | A   | 1041 | 1041 | 1 | G -> A     | 785           | SNP<br>(transition)   | 39.50%            | 0         | A -> T | hypothetical<br>protein CDS | hypothetica<br>l protein | Substituti<br>on  | KLI69<br>879.1 |
| Variables:<br>VaAphrodite_A_FDSW210055<br>057-2r | C   | 1049 | 1049 | 1 | T -> C     | 772           | SNP<br>(transition)   | 27.20%            | 0         |        | hypothetical<br>protein CDS | hypothetica<br>l protein | None              | KLI69<br>879.1 |
| Variables:<br>VaAphrodite_A_FDSW210055<br>057-2r | G   | 1083 | 1083 | 1 | A -> G     | 784           | SNP<br>(transition)   | 37.90%            | 0         | K -> E | hypothetical<br>protein CDS | hypothetica<br>l protein | Substituti<br>on  | KLI69<br>879.1 |
| Variables:<br>VaAphrodite_A_FDSW210055<br>057-2r | A   | 1100 | 1100 | 1 | G -> A     | 790           | SNP<br>(transition)   | 36.80%            | 0         |        | hypothetical<br>protein CDS | hypothetica<br>l protein | None              | KLI69<br>879.1 |
| Variables:<br>VaAphrodite_A_FDSW210055<br>057-2r | A   | 1101 | 1101 | 1 | G -> A     | 799           | SNP<br>(transition)   | 33.00%            | 0         |        |                             |                          |                   |                |

|                                                  |        |      |      |   |                  |               |                       |                   |           |          |                             |                          |                  |                |
|--------------------------------------------------|--------|------|------|---|------------------|---------------|-----------------------|-------------------|-----------|----------|-----------------------------|--------------------------|------------------|----------------|
| Variables:<br>VaAphrodite_A_FDSW210055<br>057-2r | C      | 1104 | 1104 | 1 | G -> C           | 795           | SNP<br>(transversion) | 37.20%            | 0         |          |                             |                          |                  |                |
| Variables:<br>VaAphrodite_A_FDSW210055<br>057-2r | T      | 1116 | 1116 | 1 | C -> T           | 800           | SNP<br>(transition)   | 37.80%            | 0         |          | hypothetical<br>protein CDS | hypothetica<br>l protein | None             | KLI69<br>880.1 |
| Variables:<br>VaAphrodite_A_FDSW210055<br>057-2r | T      | 1119 | 1119 | 1 | C -> T           | 802           | SNP<br>(transition)   | 35.30%            | 0         |          | hypothetical<br>protein CDS | hypothetica<br>l protein | None             | KLI69<br>880.1 |
| Variables:<br>VaAphrodite_A_FDSW210055<br>057-2r | G      | 1135 | 1135 | 1 | T -> G           | 810           | SNP<br>(transversion) | 55.90%            | 0         | F -> V   | hypothetical<br>protein CDS | hypothetica<br>l protein | Substituti<br>on | KLI69<br>880.1 |
| Variables:<br>VaAphrodite_A_FDSW210055<br>057-2r | TGTG   | 1173 | 1176 | 3 | CATA -> TGTG     | 864 -><br>871 | Substitution          | 42.5% -><br>43.2% | 0         | TI -> TV | hypothetical<br>protein CDS | hypothetica<br>l protein | Substituti<br>on | KLI69<br>880.1 |
| Variables:<br>VaAphrodite_A_FDSW210055<br>057-2r | C      | 1182 | 1182 | 1 | T -> C           | 862           | SNP<br>(transition)   | 45.00%            | 0         |          | hypothetical<br>protein CDS | hypothetica<br>l protein | None             | KLI69<br>880.1 |
| Variables:<br>VaAphrodite_A_FDSW210055<br>057-2r | G      | 1215 | 1215 | 1 | A -> G           | 794           | SNP<br>(transition)   | 50.40%            | 0         |          | hypothetical<br>protein CDS | hypothetica<br>l protein | None             | KLI69<br>880.1 |
| Variables:<br>VaAphrodite_A_FDSW210055<br>057-2r | G      | 1218 | 1218 | 1 | A -> G           | 781           | SNP<br>(transition)   | 39.20%            | 0         |          | hypothetical<br>protein CDS | hypothetica<br>l protein | None             | KLI69<br>880.1 |
| Variables:<br>VaAphrodite_A_FDSW210055<br>057-2r | G      | 1221 | 1221 | 1 | C -> G           | 767           | SNP<br>(transversion) | 38.30%            | 0         |          | hypothetical<br>protein CDS | hypothetica<br>l protein | None             | KLI69<br>880.1 |
| Variables:<br>VaAphrodite_A_FDSW210055<br>057-2r | GG     | 1232 | 1233 | 2 | AC -> GG         | 689 -><br>694 | Substitution          | 34.6% -><br>34.8% | 0         | N -> R   | hypothetical<br>protein CDS | hypothetica<br>l protein | Substituti<br>on | KLI69<br>880.1 |
| Variables:<br>VaAphrodite_A_FDSW210055<br>057-2r | T      | 1235 | 1235 | 1 | C -> T           | 676           | SNP<br>(transition)   | 34.80%            | 0         | A -> V   | hypothetical<br>protein CDS | hypothetica<br>l protein | Substituti<br>on | KLI69<br>880.1 |
| Variables:<br>VaAphrodite_A_FDSW210055<br>057-2r | G      | 1269 | 1269 | 1 | A -> G           | 484           | SNP<br>(transition)   | 61.40%            | 0         | I -> M   | hypothetical<br>protein CDS | hypothetica<br>l protein | Substituti<br>on | KLI69<br>880.1 |
| Variables:<br>VaAphrodite_A_FDSW210055<br>057-2r | G      | 1275 | 1275 | 1 | A -> G           | 450           | SNP<br>(transition)   | 63.60%            | 0         |          | hypothetical<br>protein CDS | hypothetica<br>l protein | None             | KLI69<br>880.1 |
| Variables:<br>VaAphrodite_A_FDSW210055<br>057-2r | T      | 1287 | 1287 | 1 | A -> T           | 396           | SNP<br>(transversion) | 45.70%            | 0         |          | hypothetical<br>protein CDS | hypothetica<br>l protein | None             | KLI69<br>880.1 |
| Variables:<br>VaAphrodite_A_FDSW210055<br>057-2r | T      | 1290 | 1290 | 1 | C -> T           | 387           | SNP<br>(transition)   | 45.70%            | 0         |          | hypothetical<br>protein CDS | hypothetica<br>l protein | None             | KLI69<br>880.1 |
| Variables:<br>VaAphrodite_A_FDSW210055<br>057-2r | G      | 1293 | 1293 | 1 | C -> G           | 367           | SNP<br>(transversion) | 45.00%            | 0         | D -> E   | hypothetical<br>protein CDS | hypothetica<br>l protein | Substituti<br>on | KLI69<br>880.1 |
| Variables:<br>VaAphrodite_A_FDSW210055<br>057-2r | ATTG   | 1296 | 1299 | 4 | CAAC -> ATTG     | 321 -><br>342 | Substitution          | 41.7% -><br>42.4% | 0         | TN -> TL | hypothetical<br>protein CDS | hypothetica<br>l protein | Substituti<br>on | KLI69<br>880.1 |
| Variables:<br>VaAphrodite_A_FDSW210055<br>057-2r | A      | 1305 | 1305 | 1 | G -> A           | 289           | SNP<br>(transition)   | 39.10%            | 5.40E-291 |          | hypothetical<br>protein CDS | hypothetica<br>l protein | None             | KLI69<br>880.1 |
| Variables:<br>VaAphrodite_A_FDSW210055<br>057-2r | GCT    | 1320 | 1322 | 3 | TGA -> GCT       | 189 -><br>200 | Substitution          | 26.5% -><br>29.0% | 1.60E-114 | TE -> TL | hypothetical<br>protein CDS | hypothetica<br>l protein | Substituti<br>on | KLI69<br>880.1 |
| Variables:<br>VaAphrodite_A_FDSW210055<br>057-2r | AAGTT  | 1324 | 1328 | 4 | CACAC -> AAGTT   | 164 -><br>181 | Substitution          | 72.4% -><br>77.6% | 0         | HT -> KF | hypothetical<br>protein CDS | hypothetica<br>l protein | Substituti<br>on | KLI69<br>880.1 |
| Variables:<br>VaAphrodite_A_FDSW210055<br>057-2r | AGTGCC | 1330 | 1335 | 5 | TTAACA -> AGTGCC | 127 -><br>153 | Substitution          | 73.2% -><br>80.3% | 0         | LT -> SA | hypothetical<br>protein CDS | hypothetica<br>l protein | Substituti<br>on | KLI69<br>880.1 |
| Variables:<br>VaAphrodite_A_FDSW210055<br>057-2r | TCG    | 1339 | 1341 | 3 | CGT -> TCG       | 100 -><br>106 | Substitution          | 54.0% -><br>56.6% | 2.90E-166 | R -> S   | hypothetical<br>protein CDS | hypothetica<br>l protein | Substituti<br>on | KLI69<br>880.1 |



|                                                 |                   |      |           |    |                                   |              |                       |                   |           |                   |                             |                          |                        |                |
|-------------------------------------------------|-------------------|------|-----------|----|-----------------------------------|--------------|-----------------------|-------------------|-----------|-------------------|-----------------------------|--------------------------|------------------------|----------------|
| Variants:<br>VaAphrodite_A_FDSW210055<br>057-2r |                   |      |           |    |                                   | 95 -><br>101 |                       | 51.5% -><br>54.7% |           |                   | hypothetical<br>protein CDS | hypothetica<br>l protein | Extension              | KLI69<br>880.1 |
| Variants:<br>VaAphrodite_A_FDSW210055<br>057-2r | CT                | 1342 | 1343      | 2  | TA -> CT                          |              | Substitution          |                   | 2.10E-155 |                   |                             |                          |                        |                |
| Variants:<br>VaAphrodite_A_FDSW210055<br>057-2r | G                 | 1343 | 1343      | 1  | A -> G                            | 95           | SNP<br>(transition)   | 31.60%            | 4.60E-84  |                   | hypothetical<br>protein CDS | hypothetica<br>l protein | Extension              | KLI69<br>880.1 |
| Variants:<br>VaAphrodite_A_FDSW210055<br>057-2r | T                 | 1345 | 1345      | 1  | G -> T                            | 83           | SNP<br>(transversion) | 62.70%            | 5.90E-160 |                   |                             |                          |                        |                |
| Variants:<br>VaAphrodite_A_FDSW210055<br>057-2r | TT                | 1347 | 1348      | 2  | AA -> TT                          | 78 -><br>79  | Substitution          | 73.1% -><br>77.2% | 2.00E-185 |                   |                             |                          |                        |                |
| Variants:<br>VaAphrodite_A_FDSW210055<br>057-2r | AAT               | 1351 | 1353      | 3  | GGA -> AAT                        | 64 -><br>67  | Substitution          | 67.2% -><br>70.1% | 2.60E-130 |                   |                             |                          |                        |                |
| Variants:<br>VaAphrodite_A_FDSW210055<br>057-2r | CGTC              | 1355 | >135<br>7 | >3 | TAA -> CGTC                       | 55 -><br>59  | Insertion             | 54.5% -><br>57.6% | 3.10E-90  |                   |                             |                          |                        |                |
| Variants:<br>VaAphrodite_A_FDSW210055<br>057-2r | TTA               | 1360 | 1362      | 2  | ATG -> TTA                        | 42 -><br>47  | Substitution          | 38.1% -><br>46.8% | 6.60E-44  | M -> L            | hypothetical<br>protein CDS | hypothetica<br>l protein | Start<br>Codon<br>Loss | KLI69<br>881.1 |
| Variants:<br>VaAphrodite_A_FDSW210055<br>057-2r | AA                | 2111 | 2112      | 2  | TC -> AA                          | 27 -><br>28  | Substitution          | 25.9% -><br>28.6% | 2.80E-19  | I -> K            | hypothetical<br>protein CDS | hypothetica<br>l protein | Substituti<br>on       | KLI69<br>881.1 |
| Variants:<br>VaAphrodite_A_FDSW210055<br>057-2r | CCGAAAC<br>GGATGA | 2114 | 2126      | 12 | ATTTTGAAAAAAT -><br>CCGAAACGGATGA | 27 -><br>39  | Substitution          | 35.7% -><br>61.5% | 1.30E-27  | DPEKI -><br>AETDD | hypothetical<br>protein CDS | hypothetica<br>l protein | Substituti<br>on       | KLI69<br>881.1 |
| Variants:<br>VaAphrodite_A_FDSW210055<br>057-2r | AA                | 2128 | 2129      | 2  | GC -> AA                          | 40 -><br>42  | Substitution          | 64.3% -><br>70.0% | 1.60E-81  | A -> N            | hypothetical<br>protein CDS | hypothetica<br>l protein | Substituti<br>on       | KLI69<br>881.1 |
| Variants:<br>VaAphrodite_A_FDSW210055<br>057-2r | CAC               | 2131 | 2133      | 2  | TAA -> CAC                        | 39           | Substitution          | 74.40%            | 1.60E-90  |                   | hypothetical<br>protein CDS | hypothetica<br>l protein | Extension              | KLI69<br>881.1 |
| Variants:<br>VaAphrodite_A_FDSW210055<br>057-2r | T                 | 2135 | 2135      | 1  | A -> T                            | 45           | SNP<br>(transversion) | 77.80%            | 1.00E-113 |                   |                             |                          |                        |                |
| Variants:<br>VaAphrodite_A_FDSW210055<br>057-2r | CTG               | 2137 | 2139      | 3  | AGC -> CTG                        | 43 -><br>46  | Substitution          | 83.7% -><br>89.1% | 1.90E-123 |                   |                             |                          |                        |                |
| Variants:<br>VaAphrodite_A_FDSW210055<br>057-2r | AG                | 2141 | 2142      | 2  | TT -> AG                          | 46 -><br>50  | Substitution          | 89.1% -><br>90.0% | 5.40E-134 |                   |                             |                          |                        |                |
| Variants:<br>VaAphrodite_A_FDSW210055<br>057-2r | G                 | 2145 | 2145      | 1  | A -> G                            | 53           | SNP<br>(transition)   | 90.60%            | 1.80E-157 |                   |                             |                          |                        |                |
| Variants:<br>VaAphrodite_A_FDSW210055<br>057-2r | T                 | 2147 | 2147      | 1  | A -> T                            | 55           | SNP<br>(transversion) | 90.90%            | 3.50E-169 |                   |                             |                          |                        |                |
| Variants:<br>VaAphrodite_A_FDSW210055<br>057-2r | G                 | 2149 | 2148      | 0  | #NAME?                            | 55           | Insertion             | 92.70%            | 1.10E-173 |                   |                             |                          |                        |                |
| Variants:<br>VaAphrodite_A_FDSW210055<br>057-2r | GAG               | 2902 | 2901      | 0  | #NAME?                            | 20           | Insertion             | 100.00%           | 1.00E-60  |                   |                             |                          |                        |                |
| Variants:<br>VaAphrodite_A_FDSW210055<br>057-2r | GACG              | 2904 | 2907      | 4  | ATTTC -> GACG                     | 12 -><br>14  | Substitution          | 42.9% -><br>64.3% | 1.80E-10  |                   |                             |                          |                        |                |
| Variants:<br>VaAphrodite_A_FDSW210055<br>057-2r | G                 | 2909 | 2909      | 1  | C -> G                            | 15           | SNP<br>(transversion) | 33.30%            | 9.10E-09  |                   |                             |                          |                        |                |
| Variants: VaAphrodite_A_FDSW210055057-2r        |                   | 3097 | 3097      | 1  | #NAME?                            | 185          | Deletion              | 41.10%            | 2.50E-70  |                   |                             |                          |                        |                |
| Variants:<br>VaAphrodite_A_FDSW210055<br>057-2r | TAG               | 3450 | 3452      | 3  | CGT -> TAG                        | 15 -><br>17  | Substitution          | 26.7% -><br>41.2% | 8.20E-07  |                   |                             |                          |                        |                |

|                          |                   |           |
|--------------------------|-------------------|-----------|
| SNP<br>(transversion)    | 44.00%            | 2.10E-250 |
| SNP<br>(transversion)    | 51.90%            | 6.20E-289 |
| SNP<br>(transition)      | 45.80%            | 7.10E-241 |
| SNP<br>(transition)      | 46.00%            | 1.50E-258 |
| SNP<br>(transition)      | 52.70%            | 3.40E-286 |
| SNP<br>(transition)      | 48.30%            | 2.50E-252 |
| SNP<br>(transition)      | 42.40%            | 1.10E-143 |
| SNP<br>(transversion)    | 100.00%           | 4.00E-75  |
| SNP<br>(transversion)    | 82.10%            | 7.70E-58  |
| SNP<br>(transition)      | 100.00%           | 3.20E-68  |
| SNP<br>(transversion)    | 100.00%           | 2.50E-58  |
| 20 -><br>21 Substitution | 100.00%           | 1.00E-44  |
| 18 -><br>19 Deletion     | 84.2% -><br>88.9% | 1.00E-18  |
| SNP<br>(transversion)    | 100.00%           | 1.60E-38  |
| 11 -><br>16 Substitution | 100.00%           | 5.00E-26  |
| 10 -><br>11 Substitution | 100.00%           | 1.00E-22  |
| 8 -> 9 Substitution      | 100.00%           | 4.00E-19  |
| Substitution             | 100.00%           | 4.00E-19  |
| Deletion                 | 100.00%           | 2.50E-07  |
| SNP<br>(transversion)    | 100.00%           | 1.60E-14  |
| Substitution             | 100.00%           | 6.30E-10  |
| 12 -><br>25 Substitution | 100.00%           | 4.00E-09  |

|                                                 |       |      |      |    |                |               |                                              |                   |           |          |                             |                          |                           |                |
|-------------------------------------------------|-------|------|------|----|----------------|---------------|----------------------------------------------|-------------------|-----------|----------|-----------------------------|--------------------------|---------------------------|----------------|
| Variants:<br>VaAphrodite_A_FDSW210055<br>057-2r |       | <437 |      |    |                | 273 ->        |                                              | 99.6% ->          |           |          | hypothetical<br>protein CDS | hypothetica<br>l protein | Frame<br>Shift            | KLI69<br>882.1 |
| Variants:<br>VaAphrodite_A_FDSW210055<br>057-2r | TTG   | 4    | 4375 | >2 | GA -> TTG      | 294           | Insertion                                    | 99.7%             | 0         |          |                             |                          |                           |                |
| Variants:<br>VaAphrodite_A_FDSW210055<br>057-2r | T     | 4379 | 4379 | 1  | C -> T         | 334           | SNP<br>(transition)                          | 100.00%           | 0         | A -> T   | hypothetical<br>protein CDS | hypothetica<br>l protein | Substituti<br>on          | KLI69<br>882.1 |
| Variants:<br>VaAphrodite_A_FDSW210055<br>057-2r | CATGA | 4381 | 4385 | 5  | TGGTG -> CATGA | 353 -><br>391 | Substitution                                 | 99.70%            | 0         |          | hypothetical<br>protein CDS | hypothetica<br>l protein | Truncatio<br>n            | KLI69<br>882.1 |
| Variants:<br>VaAphrodite_A_FDSW210055<br>057-2r | GG    | 4388 | 4389 | 2  | CA -> GG       | 410 -><br>413 | Substitution                                 | 99.80%            | 0         | PE -> PQ | hypothetical<br>protein CDS | hypothetica<br>l protein | Substituti<br>on          | KLI69<br>882.1 |
| Variants:<br>VaAphrodite_A_FDSW210055<br>057-2r | TGA   | 4392 | 4394 | 2  | CGT -> TGA     | 439 -><br>457 | Substitution                                 | 99.80%            | 0         | T -> S   | hypothetical<br>protein CDS | hypothetica<br>l protein | Substituti<br>on          | KLI69<br>882.1 |
| Variants:<br>VaAphrodite_A_FDSW210055<br>057-2r | GT    | 4396 | 4397 | 2  | AA -> GT       | 464 -><br>472 | Substitution                                 | 99.80%            | 0         | F -> T   | hypothetical<br>protein CDS | hypothetica<br>l protein | Substituti<br>on<br>Start | KLI69<br>882.1 |
| Variants:<br>VaAphrodite_A_FDSW210055<br>057-2r | A     | 4401 | 4401 | 1  | C -> A         | 511           | SNP<br>(transversion)                        | 100.00%           | 0         | M -> V   | hypothetical<br>protein CDS | hypothetica<br>l protein | Codon<br>Loss             | KLI69<br>882.1 |
| Variants:<br>VaAphrodite_A_FDSW210055<br>057-2r | A     | 4404 | 4406 | 3  | GTT -> A       | 537           | Deletion                                     | 99.80%            | 0         |          |                             |                          |                           |                |
| Variants:<br>VaAphrodite_A_FDSW210055<br>057-2r | GT    | 4409 | 4410 | 2  | TC -> GT       | 552 -><br>558 | Substitution                                 | 99.80%            | 0         |          |                             |                          |                           |                |
| Variants:<br>VaAphrodite_A_FDSW210055<br>057-2r | GC    | 4414 | 4415 | 2  | CT -> GC       | 581 -><br>603 | Substitution                                 | 99.80%            | 0         |          |                             |                          |                           |                |
| Variants:<br>VaAphrodite_A_FDSW210055<br>057-2r | A     | 4417 | 4417 | 1  | G -> A         | 625           | SNP<br>(transition)                          | 99.70%            | 0         |          |                             |                          |                           |                |
| Variants:<br>VaAphrodite_A_FDSW210055<br>057-2r | GG    | 4419 | 4420 | 2  | CA -> GG       | 645 -><br>663 | Substitution                                 | 99.50%            | 0         |          |                             |                          |                           |                |
| Variants:<br>VaAphrodite_A_FDSW210055<br>057-2r | AC    | 4423 | 4424 | 2  | GA -> AC       | 704 -><br>711 | Substitution                                 | 99.1% -><br>99.2% | 0         |          |                             |                          |                           |                |
| Variants:<br>VaAphrodite_A_FDSW210055<br>057-2r | G     | 4427 | 4426 | 0  | #NAME?         | 740           | Insertion                                    | 99.30%            | 0         |          |                             |                          |                           |                |
| Variants:<br>VaAphrodite_A_FDSW210055<br>057-2r | TG    | 4431 | 4432 | 2  | GA -> TG       | 786 -><br>794 | Substitution                                 | 99.6% -><br>99.9% | 0         |          |                             |                          |                           |                |
| Variants:<br>VaAphrodite_A_FDSW210055<br>057-2r | A     | 4434 | 4433 | 0  | #NAME?         | 812           | Insertion                                    | 99.90%            | 0         |          |                             |                          |                           |                |
| Variants:<br>VaAphrodite_A_FDSW210055<br>057-2r | CA    | 4435 | 4436 | 2  | GT -> CA       | 843 -><br>856 | Substitution                                 | 99.60%            | 0         |          |                             |                          |                           |                |
| Variants:<br>VaAphrodite_A_FDSW210055<br>057-2r | A     | 4973 | 4973 | 1  | G -> A         | 195           | SNP<br>(transition)                          | 74.40%            | 0         |          |                             |                          |                           |                |
| Variants:<br>VaAphrodite_A_FDSW210055<br>057-2r | C     | 4975 | 4974 | 0  | +C             | 183           | Insertion                                    | 74.30%            | 0         |          |                             |                          |                           |                |
| Variants:<br>VaAphrodite_A_FDSW210055<br>057-2r | G     | 4975 | 4974 | 0  | #NAME?         | 179           | Insertion<br>Insertion<br>(tandem<br>repeat) | 49.20%            | 1.70E-238 |          |                             |                          |                           |                |
| Variants:<br>VaAphrodite_A_FDSW210055<br>057-2r | T     | 4975 | 4974 | 0  | (T)3 -> (T)4   | 179           |                                              | 25.70%            | 1.20E-95  |          |                             |                          |                           |                |
| Variants:<br>VaAphrodite_A_FDSW210055<br>057-2r | A     | 4975 | 4975 | 1  | T -> A         | 180           | SNP<br>(transversion)                        | 48.30%            | 2.50E-252 |          |                             |                          |                           |                |

|              |            |                |           |
|--------------|------------|----------------|-----------|
| SNP          | 180        | 25.00%         | 5.90E-111 |
| SNP          | 176        | 46.60%         | 2.40E-244 |
| SNP          | 163        | 46.00%         | 4.20E-208 |
| SNP          | 159        | 70.40%         | 0         |
| SNP          | 158        | 46.20%         | 4.50E-210 |
| SNP          | 149        | 71.10%         | 8.5E-313  |
| SNP          | 148        | 70.90%         | 3.8E-320  |
| SNP          | 144        | 91.70%         | 0         |
| SNP          | 146        | 45.90%         | 5.50E-186 |
| Substitution | 141 -> 145 | 66.7% -> 66.9% | 1.00E-276 |
| SNP          | 135        | 44.40%         | 1.30E-159 |
| SNP          | 135        | 45.20%         | 7.70E-163 |
| SNP          | 131        | 64.90%         | 1.70E-245 |
| Substitution | 116 -> 121 | 86.2% -> 87.6% | 1.7E-311  |
| SNP          | 115        | 40.90%         | 8.60E-114 |
| Substitution | 100 -> 109 | 55.0% -> 60.6% | 1.20E-173 |
| SNP          | 99         | 35.40%         | 6.90E-93  |
| SNP          | 94         | 54.30%         | 4.50E-147 |
| SNP          | 90         | 32.20%         | 1.00E-78  |
| SNP          | 90         | 38.90%         | 1.10E-94  |
| SNP          | 84         | 28.60%         | 2.40E-54  |
| SNP          | 85         | 47.10%         | 2.80E-104 |

|              |          |                |           |
|--------------|----------|----------------|-----------|
| SNP          | 80       | 38.80%         | 7.00E-81  |
| SNP          | 71       | 36.60%         | 1.70E-72  |
| SNP          | 64       | 26.60%         | 1.10E-41  |
| SNP          | 64       | 31.30%         | 1.90E-54  |
| SNP          | 58       | 31.00%         | 2.80E-47  |
| SNP          | 52       | 38.50%         | 1.20E-50  |
| SNP          | 45       | 100.00%        | 3.20E-149 |
| SNP          | 44       | 100.00%        | 1.60E-141 |
| Substitution | 41 -> 42 | 100.00%        | 4.00E-140 |
| Substitution | 29 -> 32 | 27.6% -> 34.4% | 2.10E-09  |
| Substitution | 39 -> 41 | 51.3% -> 53.7% | 6.00E-32  |
| Substitution | 43 -> 44 | 55.8% -> 59.1% | 6.70E-37  |
| Substitution | 42 -> 47 | 63.6% -> 66.0% | 1.80E-46  |
| SNP          | 49       | 67.30%         | 1.50E-57  |
| SNP          | 49       | 28.60%         | 6.50E-31  |
| Substitution | 51       | 96.10%         | 3.20E-115 |
| SNP          | 49       | 75.50%         | 3.40E-71  |
| SNP          | 50       | 96.00%         | 7.70E-113 |
| SNP          | 51       | 72.50%         | 4.70E-70  |
| Substitution | 49 -> 52 | 88.5% -> 93.9% | 2.90E-102 |
| SNP          | 52       | 73.10%         | 2.50E-68  |
| SNP          | 56       | 83.90%         | 1.40E-89  |

|                                                 |      |      |      |   |              |             |                                             |                   |  |           |
|-------------------------------------------------|------|------|------|---|--------------|-------------|---------------------------------------------|-------------------|--|-----------|
| Variants:<br>VaAphrodite_A_FDSW210055<br>057-2r | TATG | 5633 | 5636 | 4 | ATCA -> TATG | 57 -><br>58 |                                             | 65.5% -><br>66.7% |  |           |
| Variants:<br>VaAphrodite_A_FDSW210055<br>057-2r | AA   | 5637 | 5638 | 2 | TT -> AA     | 61          | Substitution                                | 77.00%            |  | 1.50E-93  |
| Variants:<br>VaAphrodite_A_FDSW210055<br>057-2r | AG   | 5645 | 5646 | 2 | TC -> AG     | 68 -><br>70 | Substitution<br>Deletion<br>(tandem repeat) | 74.3% -><br>76.5% |  | 5.20E-108 |
| Variants: VaAphrodite_A_FDSW210055057-2r        |      | 5648 | 5648 | 1 | (C)3 -> (C)2 | 80          |                                             | 63.70%            |  | 3.90E-36  |
| Variants:<br>VaAphrodite_A_FDSW210055<br>057-2r | T    | 5653 | 5653 | 1 | G -> T       | 110         | SNP<br>(transversion)                       | 58.20%            |  | 1.10E-116 |
| Variants:<br>VaAphrodite_A_FDSW210055<br>057-2r | GC   | 5658 | 5657 | 0 | #NAME?       | 132         | Insertion                                   | 46.20%            |  | 9.10E-103 |
| Variants:<br>VaAphrodite_B_FDSW210055<br>058-2r | TGGT | 79   | 82   | 4 | CCTG -> TGGT | 58 -><br>61 |                                             | 91.4% -><br>94.9% |  | 8.60E-95  |
| Variants:<br>VaAphrodite_B_FDSW210055<br>058-2r | G    | 84   | 84   | 1 | A -> G       | 50          | SNP<br>(transition)                         | 96.00%            |  | 1.20E-93  |
| Variants:<br>VaAphrodite_B_FDSW210055<br>058-2r | GGGG | 86   | 89   | 4 | CATC -> GGGG | 47 -><br>49 |                                             | 70.2% -><br>83.0% |  | 1.10E-48  |
| Variants:<br>VaAphrodite_B_FDSW210055<br>058-2r | C    | 91   | 91   | 1 | T -> C       | 46          | SNP<br>(transition)                         | 65.20%            |  | 8.10E-46  |
| Variants:<br>VaAphrodite_B_FDSW210055<br>058-2r | GGA  | 93   | 95   | 3 | CAC -> GGA   | 41 -><br>45 |                                             | 36.6% -><br>44.4% |  | 1.20E-15  |
| Variants:<br>VaAphrodite_B_FDSW210055<br>058-2r | T    | 97   | 97   | 1 | A -> T       | 43          | SNP<br>(transversion)                       | 27.90%            |  | 1.20E-14  |
| Variants:<br>VaAphrodite_B_FDSW210055<br>058-2r | C    | 102  | 102  | 1 | T -> C       | 52          | SNP<br>(transition)                         | 57.70%            |  | 1.60E-34  |
| Variants:<br>VaAphrodite_B_FDSW210055<br>058-2r | G    | 120  | 120  | 1 | A -> G       | 131         | SNP<br>(transition)                         | 40.50%            |  | 4.70E-44  |
| Variants:<br>VaAphrodite_B_FDSW210055<br>058-2r | T    | 126  | 126  | 1 | C -> T       | 170         | SNP<br>(transition)                         | 41.20%            |  | 2.70E-58  |
| Variants:<br>VaAphrodite_B_FDSW210055<br>058-2r | T    | 129  | 129  | 1 | C -> T       | 185         | SNP<br>(transition)                         | 78.90%            |  | 5.00E-209 |
| Variants:<br>VaAphrodite_B_FDSW210055<br>058-2r | G    | 132  | 132  | 1 | C -> G       | 200         | SNP<br>(transversion)                       | 40.50%            |  | 7.60E-114 |
| Variants:<br>VaAphrodite_B_FDSW210055<br>058-2r | T    | 144  | 144  | 1 | C -> T       | 246         | SNP<br>(transition)                         | 40.70%            |  | 4.20E-101 |
| Variants:<br>VaAphrodite_B_FDSW210055<br>058-2r | T    | 147  | 147  | 1 | C -> T       | 257         | SNP<br>(transition)                         | 34.20%            |  | 2.00E-56  |
| Variants:<br>VaAphrodite_B_FDSW210055<br>058-2r | G    | 150  | 150  | 1 | C -> G       | 264         | SNP<br>(transversion)                       | 25.40%            |  | 7.10E-72  |
| Variants:<br>VaAphrodite_B_FDSW210055<br>058-2r | A    | 159  | 159  | 1 | G -> A       | 288         | SNP<br>(transition)                         | 79.50%            |  | 0         |
| Variants:<br>VaAphrodite_B_FDSW210055<br>058-2r | A    | 165  | 165  | 1 | T -> A       | 308         | SNP<br>(transversion)                       | 47.70%            |  | 1.10E-188 |

|     |     |        |           |
|-----|-----|--------|-----------|
| SNP | 361 | 38.00% | 5.50E-173 |
| SNP | 393 | 35.10% | 4.70E-278 |
| SNP | 421 | 26.80% | 2.70E-156 |
| SNP | 469 | 27.70% | 3.00E-220 |
| SNP | 522 | 48.30% | 1.20E-300 |
| SNP | 547 | 33.50% | 5.00E-165 |
| SNP | 545 | 42.20% | 9.60E-280 |
| SNP | 539 | 39.70% | 0         |
| SNP | 745 | 54.60% | 0         |
| SNP | 764 | 56.20% | 0         |
| SNP | 779 | 79.50% | 0         |
| SNP | 786 | 49.70% | 0         |
| SNP | 846 | 54.60% | 0         |
| SNP | 857 | 49.50% | 0         |
| SNP | 869 | 32.60% | 0         |
| SNP | 942 | 30.30% | 0         |
| SNP | 942 | 33.30% | 0         |
| SNP | 933 | 33.20% | 0         |
| SNP | 936 | 61.90% | 0         |
| SNP | 939 | 61.10% | 0         |
| SNP | 965 | 45.80% | 0         |
| SNP | 975 | 48.10% | 0         |

112



|                                                 |     |      |      |   |            |               |                       |                   |           |        |                             |                          |                  |                |  |  |  |
|-------------------------------------------------|-----|------|------|---|------------|---------------|-----------------------|-------------------|-----------|--------|-----------------------------|--------------------------|------------------|----------------|--|--|--|
| Variants:<br>VaAphrodite_B_FDSW210055<br>058-2r | T   | 756  | 756  | 1 | G -> T     | 91            | SNP<br>(transversion) | 34.10%            | 3.50E-60  |        |                             |                          |                  |                |  |  |  |
| Variants:<br>VaAphrodite_B_FDSW210055<br>058-2r | AG  | 757  | 758  | 2 | TC -> AG   | 91 -><br>95   | Substitution          | 25.3% -><br>28.6% | 3.70E-36  |        |                             |                          |                  |                |  |  |  |
| Variants:<br>VaAphrodite_B_FDSW210055<br>058-2r | T   | 765  | 765  | 1 | C -> T     | 114           | SNP<br>(transition)   | 36.80%            | 1.90E-49  |        |                             |                          |                  |                |  |  |  |
| Variants:<br>VaAphrodite_B_FDSW210055<br>058-2r | A   | 768  | 768  | 1 | T -> A     | 118           | SNP<br>(transversion) | 50.00%            | 1.80E-137 |        |                             |                          |                  |                |  |  |  |
| Variants:<br>VaAphrodite_B_FDSW210055<br>058-2r | T   | 790  | 790  | 1 | G -> T     | 217           | SNP<br>(transversion) | 27.20%            | 4.20E-112 | R -> L | hypothetical<br>protein CDS | hypothetica<br>l protein | Substituti<br>on | KLI69<br>879.1 |  |  |  |
| Variants:<br>VaAphrodite_B_FDSW210055<br>058-2r | A   | 795  | 795  | 1 | G -> A     | 236           | SNP<br>(transition)   | 53.40%            | 6.40E-259 | A -> T | hypothetical<br>protein CDS | hypothetica<br>l protein | Substituti<br>on | KLI69<br>879.1 |  |  |  |
| Variants:<br>VaAphrodite_B_FDSW210055<br>058-2r | AAT | 801  | 803  | 2 | CAC -> AAT | 256 -><br>265 | Substitution          | 75.8% -><br>76.2% | 0         | H -> N | hypothetical<br>protein CDS | hypothetica<br>l protein | Substituti<br>on | KLI69<br>879.1 |  |  |  |
| Variants:<br>VaAphrodite_B_FDSW210055<br>058-2r | C   | 834  | 834  | 1 | T -> C     | 386           | SNP<br>(transition)   | 76.20%            | 0         | Y -> H | hypothetical<br>protein CDS | hypothetica<br>l protein | Substituti<br>on | KLI69<br>879.1 |  |  |  |
| Variants:<br>VaAphrodite_B_FDSW210055<br>058-2r | G   | 888  | 888  | 1 | A -> G     | 549           | SNP<br>(transition)   | 29.70%            | 8.4E-314  | I -> V | hypothetical<br>protein CDS | hypothetica<br>l protein | Substituti<br>on | KLI69<br>879.1 |  |  |  |
| Variants:<br>VaAphrodite_B_FDSW210055<br>058-2r | C   | 897  | 897  | 1 | T -> C     | 558           | SNP<br>(transition)   | 58.60%            | 0         | C -> R | hypothetical<br>protein CDS | hypothetica<br>l protein | Substituti<br>on | KLI69<br>879.1 |  |  |  |
| Variants:<br>VaAphrodite_B_FDSW210055<br>058-2r | C   | 900  | 900  | 1 | G -> C     | 561           | SNP<br>(transversion) | 58.30%            | 0         | D -> H | hypothetical<br>protein CDS | hypothetica<br>l protein | Substituti<br>on | KLI69<br>879.1 |  |  |  |
| Variants:<br>VaAphrodite_B_FDSW210055<br>058-2r | C   | 942  | 942  | 1 | G -> C     | 554           | SNP<br>(transversion) | 30.50%            | 3.40E-277 | G -> R | hypothetical<br>protein CDS | hypothetica<br>l protein | Substituti<br>on | KLI69<br>879.1 |  |  |  |
| Variants:<br>VaAphrodite_B_FDSW210055<br>058-2r | TGT | 966  | 968  | 2 | AGC -> TGT | 531 -><br>533 | Substitution          | 45.2% -><br>45.4% | 0         | S -> C | hypothetical<br>protein CDS | hypothetica<br>l protein | Substituti<br>on | KLI69<br>879.1 |  |  |  |
| Variants:<br>VaAphrodite_B_FDSW210055<br>058-2r | G   | 969  | 969  | 1 | C -> G     | 537           | SNP<br>(transversion) | 28.30%            | 1.20E-198 | P -> A | hypothetical<br>protein CDS | hypothetica<br>l protein | Substituti<br>on | KLI69<br>879.1 |  |  |  |
| Variants:<br>VaAphrodite_B_FDSW210055<br>058-2r | A   | 976  | 976  | 1 | T -> A     | 536           | SNP<br>(transversion) | 29.70%            | 3.00E-180 | V -> E | hypothetical<br>protein CDS | hypothetica<br>l protein | Substituti<br>on | KLI69<br>879.1 |  |  |  |
| Variants:<br>VaAphrodite_B_FDSW210055<br>058-2r | A   | 1008 | 1008 | 1 | G -> A     | 529           | SNP<br>(transition)   | 33.80%            | 1.20E-214 | V -> I | hypothetical<br>protein CDS | hypothetica<br>l protein | Substituti<br>on | KLI69<br>879.1 |  |  |  |
| Variants:<br>VaAphrodite_B_FDSW210055<br>058-2r | A   | 1041 | 1041 | 1 | G -> A     | 540           | SNP<br>(transition)   | 33.50%            | 1.30E-287 | A -> T | hypothetical<br>protein CDS | hypothetica<br>l protein | Substituti<br>on | KLI69<br>879.1 |  |  |  |
| Variants:<br>VaAphrodite_B_FDSW210055<br>058-2r | G   | 1083 | 1083 | 1 | A -> G     | 560           | SNP<br>(transition)   | 36.10%            | 0         | K -> E | hypothetical<br>protein CDS | hypothetica<br>l protein | Substituti<br>on | KLI69<br>879.1 |  |  |  |
| Variants:<br>VaAphrodite_B_FDSW210055<br>058-2r | A   | 1100 | 1100 | 1 | G -> A     | 588           | SNP<br>(transition)   | 38.90%            | 0         |        | hypothetical<br>protein CDS | hypothetica<br>l protein | None             | KLI69<br>879.1 |  |  |  |
| Variants:<br>VaAphrodite_B_FDSW210055<br>058-2r | A   | 1101 | 1101 | 1 | G -> A     | 594           | SNP<br>(transition)   | 34.70%            | 0         |        |                             |                          |                  |                |  |  |  |
| Variants:<br>VaAphrodite_B_FDSW210055<br>058-2r | C   | 1104 | 1104 | 1 | G -> C     | 604           | SNP<br>(transversion) | 39.70%            | 0         |        |                             |                          |                  |                |  |  |  |
| Variants:<br>VaAphrodite_B_FDSW210055<br>058-2r | T   | 1116 | 1116 | 1 | C -> T     | 616           | SNP<br>(transition)   | 39.80%            | 0         |        | hypothetical<br>protein CDS | hypothetica<br>l protein | None             | KLI69<br>880.1 |  |  |  |

|                                                  |      |      |      |   |              |               |                       |                   |           |          |                             |                          |                  |                |
|--------------------------------------------------|------|------|------|---|--------------|---------------|-----------------------|-------------------|-----------|----------|-----------------------------|--------------------------|------------------|----------------|
| Variables:<br>VaAphrodite_B_FDSW210055<br>058-2r | T    | 1119 | 1119 | 1 | C -> T       | 616           | SNP<br>(transition)   | 37.20%            | 0         |          | hypothetical<br>protein CDS | hypothetica<br>l protein | None             | KLI69<br>880.1 |
| Variables:<br>VaAphrodite_B_FDSW210055<br>058-2r | G    | 1135 | 1135 | 1 | T -> G       | 609           | SNP<br>(transversion) | 57.10%            | 0         | F -> V   | hypothetical<br>protein CDS | hypothetica<br>l protein | Substituti<br>on | KLI69<br>880.1 |
| Variables:<br>VaAphrodite_B_FDSW210055<br>058-2r | TGTG | 1173 | 1176 | 3 | CATA -> TGTG | 654 -><br>662 | Substitution          | 44.6% -><br>45.2% | 0         | TI -> TV | hypothetical<br>protein CDS | hypothetica<br>l protein | Substituti<br>on | KLI69<br>880.1 |
| Variables:<br>VaAphrodite_B_FDSW210055<br>058-2r | C    | 1182 | 1182 | 1 | T -> C       | 664           | SNP<br>(transition)   | 46.20%            | 0         |          | hypothetical<br>protein CDS | hypothetica<br>l protein | None             | KLI69<br>880.1 |
| Variables:<br>VaAphrodite_B_FDSW210055<br>058-2r | G    | 1215 | 1215 | 1 | A -> G       | 576           | SNP<br>(transition)   | 51.90%            | 0         |          | hypothetical<br>protein CDS | hypothetica<br>l protein | None             | KLI69<br>880.1 |
| Variables:<br>VaAphrodite_B_FDSW210055<br>058-2r | G    | 1218 | 1218 | 1 | A -> G       | 559           | SNP<br>(transition)   | 41.10%            | 0         |          | hypothetical<br>protein CDS | hypothetica<br>l protein | None             | KLI69<br>880.1 |
| Variables:<br>VaAphrodite_B_FDSW210055<br>058-2r | G    | 1221 | 1221 | 1 | C -> G       | 548           | SNP<br>(transversion) | 40.50%            | 0         |          | hypothetical<br>protein CDS | hypothetica<br>l protein | None             | KLI69<br>880.1 |
| Variables:<br>VaAphrodite_B_FDSW210055<br>058-2r | GG   | 1232 | 1233 | 2 | AC -> GG     | 500 -><br>507 | Substitution          | 37.7% -><br>38.2% | 0         | N -> R   | hypothetical<br>protein CDS | hypothetica<br>l protein | Substituti<br>on | KLI69<br>880.1 |
| Variables:<br>VaAphrodite_B_FDSW210055<br>058-2r | T    | 1235 | 1235 | 1 | C -> T       | 488           | SNP<br>(transition)   | 37.10%            | 0         | A -> V   | hypothetical<br>protein CDS | hypothetica<br>l protein | Substituti<br>on | KLI69<br>880.1 |
| Variables:<br>VaAphrodite_B_FDSW210055<br>058-2r | G    | 1269 | 1269 | 1 | A -> G       | 324           | SNP<br>(transition)   | 66.70%            | 0         | I -> M   | hypothetical<br>protein CDS | hypothetica<br>l protein | Substituti<br>on | KLI69<br>880.1 |
| Variables:<br>VaAphrodite_B_FDSW210055<br>058-2r | G    | 1275 | 1275 | 1 | A -> G       | 311           | SNP<br>(transition)   | 68.20%            | 0         |          | hypothetical<br>protein CDS | hypothetica<br>l protein | None             | KLI69<br>880.1 |
| Variables:<br>VaAphrodite_B_FDSW210055<br>058-2r | T    | 1287 | 1287 | 1 | A -> T       | 277           | SNP<br>(transversion) | 49.80%            | 0         |          | hypothetical<br>protein CDS | hypothetica<br>l protein | None             | KLI69<br>880.1 |
| Variables:<br>VaAphrodite_B_FDSW210055<br>058-2r | T    | 1290 | 1290 | 1 | C -> T       | 272           | SNP<br>(transition)   | 49.30%            | 0         |          | hypothetical<br>protein CDS | hypothetica<br>l protein | None             | KLI69<br>880.1 |
| Variables:<br>VaAphrodite_B_FDSW210055<br>058-2r | G    | 1293 | 1293 | 1 | C -> G       | 256           | SNP<br>(transversion) | 49.20%            | 0         | D -> E   | hypothetical<br>protein CDS | hypothetica<br>l protein | Substituti<br>on | KLI69<br>880.1 |
| Variables:<br>VaAphrodite_B_FDSW210055<br>058-2r | ATTG | 1296 | 1299 | 4 | CAAC -> ATTG | 230 -><br>243 | Substitution          | 48.7% -><br>49.8% | 1.00E-307 | TN -> TL | hypothetical<br>protein CDS | hypothetica<br>l protein | Substituti<br>on | KLI69<br>880.1 |
| Variables:<br>VaAphrodite_B_FDSW210055<br>058-2r | G    | 1302 | 1302 | 1 | A -> G       | 219           | SNP<br>(transition)   | 25.60%            | 1.80E-149 |          | hypothetical<br>protein CDS | hypothetica<br>l protein | None             | KLI69<br>880.1 |
| Variables:<br>VaAphrodite_B_FDSW210055<br>058-2r | A    | 1305 | 1305 | 1 | G -> A       | 204           | SNP<br>(transition)   | 46.60%            | 8.30E-245 |          | hypothetical<br>protein CDS | hypothetica<br>l protein | None             | KLI69<br>880.1 |
| Variables:<br>VaAphrodite_B_FDSW210055<br>058-2r | A    | 1311 | 1311 | 1 | G -> A       | 182           | SNP<br>(transition)   | 30.80%            | 2.30E-132 |          | hypothetical<br>protein CDS | hypothetica<br>l protein | None             | KLI69<br>880.1 |
| Variables:<br>VaAphrodite_B_FDSW210055<br>058-2r | T    | 1314 | 1314 | 1 | G -> T       | 160           | SNP<br>(transversion) | 28.70%            | 7.70E-103 |          | hypothetical<br>protein CDS | hypothetica<br>l protein | None             | KLI69<br>880.1 |
| Variables:<br>VaAphrodite_B_FDSW210055<br>058-2r | G    | 1317 | 1317 | 1 | C -> G       | 144           | SNP<br>(transversion) | 28.50%            | 9.90E-96  | D -> E   | hypothetical<br>protein CDS | hypothetica<br>l protein | Substituti<br>on | KLI69<br>880.1 |
| Variables:<br>VaAphrodite_B_FDSW210055<br>058-2r | GCTA | 1320 | 1323 | 4 | TGAG -> GCTA | 120 -><br>134 | Substitution          | 30.0% -><br>33.6% | 7.60E-71  | TE -> TL | hypothetical<br>protein CDS | hypothetica<br>l protein | Substituti<br>on | KLI69<br>880.1 |
| Variables:<br>VaAphrodite_B_FDSW210055<br>058-2r | A    | 1324 | 1324 | 1 | C -> A       | 117           | SNP<br>(transversion) | 34.20%            | 4.10E-127 | H -> N   | hypothetical<br>protein CDS | hypothetica<br>l protein | Substituti<br>on | KLI69<br>880.1 |

|                                                  |        |      |      |   |                  |               |                       |                   |  |           |          |                             |                          |                  |                |
|--------------------------------------------------|--------|------|------|---|------------------|---------------|-----------------------|-------------------|--|-----------|----------|-----------------------------|--------------------------|------------------|----------------|
| Variables:<br>VaAphrodite_B_FDSW210055<br>058-2r | AAGTT  | 1324 | 1328 | 4 | CACAC -> AAGTT   | 107 -><br>117 | Substitution          | 64.1% -><br>70.1% |  | 1.90E-228 | HT -> KF | hypothetical<br>protein CDS | hypothetica<br>l protein | Substituti<br>on | KLI69<br>880.1 |
| Variables:<br>VaAphrodite_B_FDSW210055<br>058-2r | AGTGCC | 1330 | 1335 | 5 | TTAACA -> AGTGCC | 79 -><br>102  | Substitution          | 65.8% -><br>72.5% |  | 6.40E-167 | LT -> SA | hypothetical<br>protein CDS | hypothetica<br>l protein | Substituti<br>on | KLI69<br>880.1 |
| Variables:<br>VaAphrodite_B_FDSW210055<br>058-2r | TCG    | 1339 | 1341 | 3 | CGT -> TCG       | 71 -><br>77   | Substitution          | 36.6% -><br>42.9% |  | 3.70E-81  | R -> S   | hypothetical<br>protein CDS | hypothetica<br>l protein | Substituti<br>on | KLI69<br>880.1 |
| Variables:<br>VaAphrodite_B_FDSW210055<br>058-2r | CT     | 1342 | 1343 | 2 | TA -> CT         | 61 -><br>67   | Substitution          | 35.8% -><br>39.3% |  | 5.90E-68  |          | hypothetical<br>protein CDS | hypothetica<br>l protein | Extension        | KLI69<br>880.1 |
| Variables:<br>VaAphrodite_B_FDSW210055<br>058-2r | T      | 1345 | 1345 | 1 | G -> T           | 58            | SNP<br>(transversion) | 41.40%            |  | 1.30E-68  |          |                             |                          |                  |                |
| Variables:<br>VaAphrodite_B_FDSW210055<br>058-2r | TT     | 1347 | 1348 | 2 | AA -> TT         | 50 -><br>52   | Substitution          | 48.0% -><br>53.8% |  | 4.80E-73  |          |                             |                          |                  |                |
| Variables:<br>VaAphrodite_B_FDSW210055<br>058-2r | AAT    | 1351 | 1353 | 3 | GGA -> AAT       | 44 -><br>46   | Substitution          | 33.3% -><br>37.0% |  | 1.00E-41  |          |                             |                          |                  |                |
| Variables:<br>VaAphrodite_B_FDSW210055<br>058-2r | CGT    | 1355 | 1357 | 3 | TAA -> CGT       | 44 -><br>45   | Substitution          | 24.4% -><br>28.9% |  | 1.80E-27  |          |                             |                          |                  |                |
| Variables:<br>VaAphrodite_B_FDSW210055<br>058-2r | A      | 2111 | 2111 | 1 | T -> A           | 30            | SNP<br>(transversion) | 33.30%            |  | 3.00E-26  | I -> N   | hypothetical<br>protein CDS | hypothetica<br>l protein | Substituti<br>on | KLI69<br>881.1 |
| Variables:<br>VaAphrodite_B_FDSW210055<br>058-2r | C      | 2114 | 2114 | 1 | A -> C           | 32            | SNP<br>(transversion) | 37.50%            |  | 8.90E-31  | D -> A   | hypothetical<br>protein CDS | hypothetica<br>l protein | Substituti<br>on | KLI69<br>881.1 |
| Variables:<br>VaAphrodite_B_FDSW210055<br>058-2r | AA     | 2117 | 2118 | 2 | TT -> AA         | 33 -><br>34   | Substitution          | 45.5% -><br>47.1% |  | 3.30E-44  |          | hypothetical<br>protein CDS | hypothetica<br>l protein | Truncatio<br>n   | KLI69<br>881.1 |
| Variables:<br>VaAphrodite_B_FDSW210055<br>058-2r | ACG    | 2119 | 2121 | 3 | GAA -> ACG       | 35 -><br>36   | Substitution          | 27.8% -><br>28.6% |  | 1.80E-26  | E -> T   | hypothetical<br>protein CDS | hypothetica<br>l protein | Substituti<br>on | KLI69<br>881.1 |
| Variables:<br>VaAphrodite_B_FDSW210055<br>058-2r | GATGA  | 2122 | 2126 | 4 | AAAAAT -> GATGA  | 37 -><br>38   | Substitution          | 36.8% -><br>40.5% |  | 4.80E-37  | KI -> DD | hypothetical<br>protein CDS | hypothetica<br>l protein | Substituti<br>on | KLI69<br>881.1 |
| Variables:<br>VaAphrodite_B_FDSW210055<br>058-2r | AA     | 2128 | 2129 | 2 | GC -> AA         | 42            | Substitution          | 45.2% -><br>47.6% |  | 5.10E-55  | A -> N   | hypothetical<br>protein CDS | hypothetica<br>l protein | Substituti<br>on | KLI69<br>881.1 |
| Variables:<br>VaAphrodite_B_FDSW210055<br>058-2r | CAC    | 2131 | 2133 | 2 | TAA -> CAC       | 39 -><br>41   | Substitution          | 51.2% -><br>53.8% |  | 8.50E-63  |          | hypothetical<br>protein CDS | hypothetica<br>l protein | Extension        | KLI69<br>881.1 |
| Variables:<br>VaAphrodite_B_FDSW210055<br>058-2r | T      | 2135 | 2135 | 1 | A -> T           | 41            | SNP<br>(transversion) | 58.50%            |  | 2.40E-66  |          |                             |                          |                  |                |
| Variables:<br>VaAphrodite_B_FDSW210055<br>058-2r | CT     | 2137 | 2138 | 2 | AG -> CT         | 45            | Substitution          | 57.80%            |  | 1.50E-71  |          |                             |                          |                  |                |
| Variables:<br>VaAphrodite_B_FDSW210055<br>058-2r | A      | 2139 | 2139 | 1 | C -> A           | 47            | SNP<br>(transversion) | 29.80%            |  | 1.30E-39  |          |                             |                          |                  |                |
| Variables:<br>VaAphrodite_B_FDSW210055<br>058-2r | G      | 2139 | 2139 | 1 | C -> G           | 47            | SNP<br>(transversion) | 55.30%            |  | 1.20E-78  |          |                             |                          |                  |                |
| Variables:<br>VaAphrodite_B_FDSW210055<br>058-2r | A      | 2141 | 2141 | 1 | T -> A           | 51            | SNP<br>(transversion) | 51.00%            |  | 9.60E-62  |          |                             |                          |                  |                |
| Variables:<br>VaAphrodite_B_FDSW210055<br>058-2r | G      | 2141 | 2141 | 1 | T -> G           | 51            | SNP<br>(transversion) | 37.30%            |  | 1.50E-53  |          |                             |                          |                  |                |
| Variables:<br>VaAphrodite_B_FDSW210055<br>058-2r | G      | 2142 | 2142 | 1 | T -> G           | 51            | SNP<br>(transversion) | 52.90%            |  | 1.80E-75  |          |                             |                          |                  |                |

116

|                                                  |          |      |      |   |                         |               |              |                       |           |          |                             |                             |                          |                        |                |  |  |
|--------------------------------------------------|----------|------|------|---|-------------------------|---------------|--------------|-----------------------|-----------|----------|-----------------------------|-----------------------------|--------------------------|------------------------|----------------|--|--|
| Variables:<br>VaAphrodite_B_FDSW210055<br>058-2r | TTG      | 4031 | 4033 | 3 | CCA -> TTG              | 27 -><br>28   | Substitution | 100.00%               | 5.00E-52  |          |                             |                             |                          |                        |                |  |  |
| Variables:<br>VaAphrodite_B_FDSW210055<br>058-2r | T        | 4035 | 4035 | 1 | C -> T                  |               | 26           | SNP<br>(transition)   | 65.40%    | 2.40E-33 |                             |                             |                          |                        |                |  |  |
| Variables:<br>VaAphrodite_B_FDSW210055<br>058-2r | T        | 4036 | 4036 | 1 | G -> T                  |               | 25           | SNP<br>(transversion) | 100.00%   | 1.00E-45 |                             |                             |                          |                        |                |  |  |
| Variables:<br>VaAphrodite_B_FDSW210055<br>058-2r | T        | 4037 | 4037 | 1 | G -> T                  |               | 24           | SNP<br>(transversion) | 62.50%    | 1.20E-27 |                             |                             |                          |                        |                |  |  |
| Variables:<br>VaAphrodite_B_FDSW210055<br>058-2r | TA       | 4038 | 4039 | 2 | CT -> TA                | 23 -><br>24   | Substitution | 100.00%               | 7.90E-40  |          |                             |                             |                          |                        |                |  |  |
| Variables:<br>VaAphrodite_B_FDSW210055<br>058-2r | G        | 4040 | 4040 | 1 | T -> G                  |               | 22           | SNP<br>(transversion) | 63.60%    | 4.80E-26 |                             |                             |                          |                        |                |  |  |
| Variables:<br>VaAphrodite_B_FDSW210055<br>058-2r | TGTTTAAG | 4041 | 4048 | 8 | GTACCGTT -><br>TGTTTAAG | 17 -><br>22   | Substitution | 94.1% -><br>95.5%     | 5.00E-33  |          |                             |                             |                          |                        |                |  |  |
| Variables:<br>VaAphrodite_B_FDSW210055<br>058-2r | T        | 4050 | 4050 | 1 | C -> T                  |               | 15           | SNP<br>(transition)   | 100.00%   | 1.00E-30 |                             |                             |                          |                        |                |  |  |
| Variables:<br>VaAphrodite_B_FDSW210055<br>058-2r | G        | 4052 | 4052 | 1 | C -> G                  |               | 14           | SNP<br>(transversion) | 92.90%    | 1.40E-25 |                             |                             |                          |                        |                |  |  |
| Variables:<br>VaAphrodite_B_FDSW210055<br>058-2r | ATGCGG   | 4054 | 4059 | 6 | GCTGCT -> ATGCGG        | 11 -><br>12   | Substitution | 90.9% -><br>91.7%     | 1.10E-20  |          |                             |                             |                          |                        |                |  |  |
| Variables:<br>VaAphrodite_B_FDSW210055<br>058-2r | GG       | 4061 | 4062 | 2 | TT -> GG                |               | 11           | Substitution          | 90.90%    | 1.10E-20 |                             |                             |                          |                        |                |  |  |
| Variables:<br>VaAphrodite_B_FDSW210055<br>058-2r | TCGGTA   | 4065 | 4070 | 6 | ATACCG -> TCGGTA        | 6 -><br>10    | Substitution | 100.00%               | 1.00E-12  |          |                             |                             |                          |                        |                |  |  |
| Variables:<br>VaAphrodite_B_FDSW210055<br>058-2r | T        | 4072 | 4072 | 1 | C -> T                  |               | 5            | SNP<br>(transition)   | 100.00%   | 1.00E-10 |                             |                             |                          |                        |                |  |  |
| Variables:<br>VaAphrodite_B_FDSW210055<br>058-2r | AA       | 4343 | 4344 | 2 | CG -> AA                | 16 -><br>22   | Substitution | 93.8% -><br>95.5%     | 5.00E-25  | FD -> FY | hypothetical<br>protein CDS | hypothetica<br>l protein    | Substituti<br>on         | KLI69<br>882.1         |                |  |  |
| Variables:<br>VaAphrodite_B_FDSW210055<br>058-2r | A        | 4365 | 4365 | 1 | G -> A                  |               | 178          | SNP<br>(transition)   | 99.40%    | 0        |                             | hypothetical<br>protein CDS | hypothetica<br>l protein | None                   | KLI69<br>882.1 |  |  |
| Variables:<br>VaAphrodite_B_FDSW210055<br>058-2r | TG       | 4371 | 4376 | 6 | GCCGAT -> TG            | 215 -><br>229 | Deletion     | 93.4% -><br>99.5%     | 1.00E-301 |          | hypothetical<br>protein CDS | hypothetica<br>l protein    | Frame<br>Shift           | KLI69<br>882.1         |                |  |  |
| Variables:<br>VaAphrodite_B_FDSW210055<br>058-2r | T        | 4378 | 4379 | 2 | GC -> T                 | 250 -><br>261 | Deletion     | 85.6% -><br>86.2%     | 2.40E-257 |          | hypothetical<br>protein CDS | hypothetica<br>l protein    | Frame<br>Shift           | KLI69<br>882.1         |                |  |  |
| Variables:<br>VaAphrodite_B_FDSW210055<br>058-2r | CATGA    | 4381 | 4385 | 5 | TGGTG -> CATGA          | 274 -><br>296 | Substitution | 99.3% -><br>99.7%     | 0         |          | hypothetical<br>protein CDS | hypothetica<br>l protein    | Truncatio<br>n           | KLI69<br>882.1         |                |  |  |
| Variables:<br>VaAphrodite_B_FDSW210055<br>058-2r | GG       | 4388 | 4389 | 2 | CA -> GG                | 321 -><br>328 | Substitution | 99.70%                | 0         | PE -> PQ | hypothetical<br>protein CDS | hypothetica<br>l protein    | Substituti<br>on         | KLI69<br>882.1         |                |  |  |
| Variables:<br>VaAphrodite_B_FDSW210055<br>058-2r | TGA      | 4392 | 4394 | 2 | CGT -> TGA              | 345 -><br>353 | Substitution | 100.00%               | 0         | T -> S   | hypothetical<br>protein CDS | hypothetica<br>l protein    | Substituti<br>on         | KLI69<br>882.1         |                |  |  |
| Variables:<br>VaAphrodite_B_FDSW210055<br>058-2r | GT       | 4396 | 4397 | 2 | AA -> GT                | 367 -><br>375 | Substitution | 99.50%                | 0         | F -> T   | hypothetical<br>protein CDS | hypothetica<br>l protein    | Substituti<br>on         | KLI69<br>882.1         |                |  |  |
| Variables:<br>VaAphrodite_B_FDSW210055<br>058-2r | A        | 4401 | 4401 | 1 | C -> A                  |               | 407          | SNP<br>(transversion) | 99.80%    | 0        | M -> V                      | hypothetical<br>protein CDS | hypothetica<br>l protein | Start<br>Codon<br>Loss | KLI69<br>882.1 |  |  |

|                          |    |      |      |   |              |        |                 |          |           |
|--------------------------|----|------|------|---|--------------|--------|-----------------|----------|-----------|
| Variants:                |    |      |      |   |              |        |                 |          |           |
| VaAphrodite_B_FDSW210055 |    |      |      |   |              |        |                 |          |           |
| 058-2r                   | A  | 4404 | 4406 | 3 | GTT -> A     | 429    | Deletion        | 99.80%   | 0         |
| Variants:                |    |      |      |   |              |        |                 |          |           |
| VaAphrodite_B_FDSW210055 |    |      |      |   |              | 449 -> |                 |          |           |
| 058-2r                   | GT | 4409 | 4410 | 2 | TC -> GT     | 460    | Substitution    | 99.10%   | 0         |
| Variants:                |    |      |      |   |              |        |                 |          |           |
| VaAphrodite_B_FDSW210055 |    |      |      |   |              | 485 -> |                 |          |           |
| 058-2r                   | GC | 4414 | 4415 | 2 | CT -> GC     | 499    | Substitution    | 99.40%   | 0         |
| Variants:                |    |      |      |   |              |        |                 |          |           |
| VaAphrodite_B_FDSW210055 |    |      |      |   |              |        | SNP             |          |           |
| 058-2r                   | A  | 4417 | 4417 | 1 | G -> A       | 517    | (transition)    | 99.80%   | 0         |
| Variants:                |    |      |      |   |              |        |                 |          |           |
| VaAphrodite_B_FDSW210055 |    |      |      |   |              | 527 -> |                 |          |           |
| 058-2r                   | GG | 4419 | 4420 | 2 | CA -> GG     | 535    | Substitution    | 99.40%   | 0         |
| Variants:                |    |      |      |   |              |        |                 |          |           |
| VaAphrodite_B_FDSW210055 |    |      |      |   |              | 555 -> |                 |          |           |
| 058-2r                   | AC | 4423 | 4424 | 2 | GA -> AC     | 559    | Substitution    | 99.60%   | 0         |
| Variants:                |    |      |      |   |              |        |                 |          |           |
| VaAphrodite_B_FDSW210055 |    |      |      |   |              |        |                 |          |           |
| 058-2r                   | G  | 4427 | 4426 | 0 | #NAME?       | 576    | Insertion       | 99.80%   | 0         |
| Variants:                |    |      |      |   |              |        |                 |          |           |
| VaAphrodite_B_FDSW210055 |    |      |      |   |              | 613 -> |                 |          |           |
| 058-2r                   | TG | 4431 | 4432 | 2 | GA -> TG     | 618    | Substitution    | 99.70%   | 0         |
| Variants:                |    |      |      |   |              |        |                 |          |           |
| VaAphrodite_B_FDSW210055 |    |      |      |   |              |        |                 |          |           |
| 058-2r                   | A  | 4434 | 4433 | 0 | #NAME?       | 635    | Insertion       | 100.00%  | 0         |
| Variants:                |    |      |      |   |              |        |                 |          |           |
| VaAphrodite_B_FDSW210055 |    |      |      |   |              | 647 -> |                 |          |           |
| 058-2r                   | CA | 4435 | 4436 | 2 | GT -> CA     | 652    | Substitution    | 100.00%  | 0         |
| Variants:                |    |      |      |   |              |        |                 |          |           |
| VaAphrodite_B_FDSW210055 |    |      |      |   |              |        | SNP             |          |           |
| 058-2r                   | A  | 4668 | 4668 | 1 | G -> A       | 756    | (transition)    | 25.50%   | 0         |
| Variants:                |    |      |      |   |              |        |                 |          |           |
| VaAphrodite_B_FDSW210055 |    |      |      |   |              |        | SNP             |          |           |
| 058-2r                   | A  | 4973 | 4973 | 1 | G -> A       | 166    | (transition)    | 66.90%   | 0         |
| Variants:                |    |      |      |   |              |        |                 |          |           |
| VaAphrodite_B_FDSW210055 |    |      |      |   |              |        |                 |          |           |
| 058-2r                   | C  | 4975 | 4974 | 0 | +C           | 158    | Insertion       | 85.40%   | 0         |
| Variants:                |    |      |      |   |              |        |                 |          |           |
| VaAphrodite_B_FDSW210055 |    |      |      |   |              |        |                 |          |           |
| 058-2r                   | G  | 4975 | 4974 | 0 | #NAME?       | 154    | Insertion       | 52.60%   | 4.60E-231 |
| Variants:                |    |      |      |   |              |        |                 |          |           |
| VaAphrodite_B_FDSW210055 |    |      |      |   |              |        | Insertion       |          |           |
| 058-2r                   | T  | 4975 | 4974 | 0 | (T)3 -> (T)4 | 154    | (tandem repeat) | 34.40%   | 4.70E-139 |
| Variants:                |    |      |      |   |              |        |                 |          |           |
| VaAphrodite_B_FDSW210055 |    |      |      |   |              | 144 -> |                 | 48.6% -> |           |
| 058-2r                   | AA | 4975 | 4976 | 2 | TT -> AA     | 145    | Substitution    | 49.7%    | 1.40E-196 |
| Variants:                |    |      |      |   |              |        |                 |          |           |
| VaAphrodite_B_FDSW210055 |    |      |      |   |              |        | SNP             |          |           |
| 058-2r                   | G  | 4978 | 4978 | 1 | A -> G       | 139    | (transition)    | 48.20%   | 1.30E-194 |
| Variants:                |    |      |      |   |              |        |                 |          |           |
| VaAphrodite_B_FDSW210055 |    |      |      |   |              |        | SNP             |          |           |
| 058-2r                   | A  | 4979 | 4979 | 1 | G -> A       | 130    | (transition)    | 60.80%   | 1.10E-232 |
| Variants:                |    |      |      |   |              |        |                 |          |           |
| VaAphrodite_B_FDSW210055 |    |      |      |   |              |        | SNP             |          |           |
| 058-2r                   | T  | 4980 | 4980 | 1 | A -> T       | 128    | (transversion)  | 49.20%   | 1.50E-177 |
| Variants:                |    |      |      |   |              |        |                 |          |           |
| VaAphrodite_B_FDSW210055 |    |      |      |   |              |        | SNP             |          |           |
| 058-2r                   | A  | 4981 | 4981 | 1 | G -> A       | 124    | (transition)    | 62.10%   | 3.10E-220 |
| Variants:                |    |      |      |   |              |        |                 |          |           |
| VaAphrodite_B_FDSW210055 |    |      |      |   |              |        | SNP             |          |           |
| 058-2r                   | C  | 4981 | 4981 | 1 | G -> C       | 124    | (transversion)  | 29.00%   | 8.40E-92  |
| Variants:                |    |      |      |   |              |        |                 |          |           |
| VaAphrodite_B_FDSW210055 |    |      |      |   |              |        | SNP             |          |           |
| 058-2r                   | A  | 4982 | 4982 | 1 | T -> A       | 124    | (transversion)  | 76.60%   | 1.60E-295 |

|              |          |                |           |
|--------------|----------|----------------|-----------|
| SNP          | 124      | 88.70%         | 0         |
| SNP          | 122      | 47.50%         | 5.20E-174 |
| SNP          | 118      | 59.30%         | 3.10E-198 |
| SNP          | 118      | 29.70%         | 1.10E-89  |
| SNP          | 114      | 30.70%         | 8.50E-94  |
| SNP          | 114      | 57.90%         | 5.80E-186 |
| SNP          | 104      | 49.00%         | 9.50E-134 |
| SNP          | 104      | 37.50%         | 1.20E-100 |
| SNP          | 100      | 75.00%         | 2.40E-217 |
| Substitution | 85 -> 87 | 83.5% -> 83.9% | 1.90E-219 |
| SNP          | 84       | 42.90%         | 4.40E-92  |
| SNP          | 85       | 48.20%         | 9.90E-120 |
| SNP          | 85       | 30.60%         | 7.80E-65  |
| SNP          | 83       | 30.10%         | 3.40E-67  |
| SNP          | 83       | 47.00%         | 2.90E-117 |
| SNP          | 82       | 46.30%         | 3.40E-110 |
| SNP          | 82       | 30.50%         | 2.30E-62  |
| SNP          | 81       | 29.60%         | 5.70E-62  |
| SNP          | 81       | 35.80%         | 1.60E-74  |
| SNP          | 80       | 62.50%         | 8.70E-144 |
| SNP          | 77       | 32.50%         | 3.60E-68  |
| SNP          | 77       | 39.00%         | 2.10E-75  |

|              |          |                |           |
|--------------|----------|----------------|-----------|
| SNP          | 72       | 30.60%         | 1.70E-48  |
| SNP          | 72       | 27.80%         | 3.00E-47  |
| SNP          | 70       | 55.70%         | 6.90E-98  |
| SNP          | 71       | 38.00%         | 5.70E-65  |
| SNP          | 71       | 28.20%         | 2.20E-51  |
| Substitution | 57 -> 58 | 33.3% -> 36.2% | 9.90E-47  |
| SNP          | 53       | 34.00%         | 6.30E-41  |
| SNP          | 45       | 31.10%         | 2.60E-34  |
| SNP          | 48       | 100.00%        | 1.00E-168 |
| SNP          | 48       | 100.00%        | 2.50E-154 |
| Substitution | 47       | 100.00%        | 1.60E-160 |
| Substitution | 39 -> 40 | 25.0% -> 28.2% | 8.20E-22  |
| Substitution | 42 -> 45 | 35.7% -> 40.0% | 3.00E-33  |
| Substitution | 51 -> 55 | 47.1% -> 52.7% | 2.20E-58  |
| Substitution | 51 -> 52 | 60.8% -> 63.5% | 4.80E-86  |
| SNP          | 52       | 65.40%         | 6.70E-96  |
| SNP          | 52       | 34.60%         | 1.10E-44  |
| Substitution | 51 -> 52 | 100.00%        | 4.00E-167 |
| SNP          | 53       | 67.90%         | 5.10E-106 |
| SNP          | 54       | 100.00%        | 4.00E-168 |
| SNP          | 55       | 67.30%         | 1.10E-108 |
| Substitution | 57 -> 58 | 96.5% -> 96.6% | 1.60E-165 |



|   |   |   |   |   |   |   |   |   |    |    |    |    |    |    |    |    |    |    |    |    |    |    |    |    |    |    |    |    |    |    |    |    |    |    |    |    |    |    |    |    |    |    |    |    |    |    |    |    |    |    |    |    |    |    |    |    |    |    |    |    |    |    |    |    |    |    |    |    |    |    |    |    |    |    |    |    |    |    |    |    |    |    |    |    |    |    |    |    |    |    |    |    |    |    |    |    |    |    |     |     |     |     |     |     |     |     |     |     |     |     |     |     |     |     |     |     |     |     |     |     |     |     |     |     |     |     |     |     |     |     |     |     |     |     |     |     |     |     |     |     |     |     |     |     |     |     |     |     |     |     |     |     |     |     |     |     |     |     |     |     |     |     |     |     |     |     |     |     |     |     |     |     |     |     |     |     |     |     |     |     |     |     |     |     |     |     |     |     |     |     |     |     |     |     |     |     |     |     |     |     |     |     |     |     |     |     |     |     |     |     |     |     |     |     |     |     |     |     |     |     |     |     |     |     |     |     |     |     |     |     |     |     |     |     |     |     |     |     |     |     |     |     |     |     |     |     |     |     |     |     |     |     |     |     |     |     |     |     |     |     |     |     |     |     |     |     |     |     |     |     |     |     |     |     |     |     |     |     |     |     |     |     |     |     |     |     |     |     |     |     |     |     |     |     |     |     |     |     |     |     |     |     |     |     |     |     |     |     |     |     |     |     |     |     |     |     |     |     |     |     |     |     |     |     |     |     |     |     |     |     |     |     |     |     |     |     |     |     |     |     |     |     |     |     |     |     |     |     |     |     |     |     |     |     |     |     |     |     |     |     |     |     |     |     |     |     |     |     |     |     |     |     |     |     |     |     |     |     |     |     |     |     |     |     |     |     |     |     |     |     |     |     |     |     |     |     |     |     |     |     |     |     |     |     |     |     |     |     |     |     |     |     |     |     |     |     |     |     |     |     |     |     |     |     |     |     |     |     |     |     |     |     |     |     |     |     |     |     |     |     |     |     |     |     |     |     |     |     |     |     |     |     |     |     |     |     |     |     |     |     |     |     |     |     |     |     |     |     |     |     |     |     |     |     |     |     |     |     |     |     |     |     |     |     |     |     |     |     |     |     |     |     |     |     |     |     |     |     |     |     |     |     |     |     |     |     |     |     |     |     |     |     |     |     |     |     |     |     |     |     |     |     |     |     |
|---|---|---|---|---|---|---|---|---|----|----|----|----|----|----|----|----|----|----|----|----|----|----|----|----|----|----|----|----|----|----|----|----|----|----|----|----|----|----|----|----|----|----|----|----|----|----|----|----|----|----|----|----|----|----|----|----|----|----|----|----|----|----|----|----|----|----|----|----|----|----|----|----|----|----|----|----|----|----|----|----|----|----|----|----|----|----|----|----|----|----|----|----|----|----|----|----|----|----|-----|-----|-----|-----|-----|-----|-----|-----|-----|-----|-----|-----|-----|-----|-----|-----|-----|-----|-----|-----|-----|-----|-----|-----|-----|-----|-----|-----|-----|-----|-----|-----|-----|-----|-----|-----|-----|-----|-----|-----|-----|-----|-----|-----|-----|-----|-----|-----|-----|-----|-----|-----|-----|-----|-----|-----|-----|-----|-----|-----|-----|-----|-----|-----|-----|-----|-----|-----|-----|-----|-----|-----|-----|-----|-----|-----|-----|-----|-----|-----|-----|-----|-----|-----|-----|-----|-----|-----|-----|-----|-----|-----|-----|-----|-----|-----|-----|-----|-----|-----|-----|-----|-----|-----|-----|-----|-----|-----|-----|-----|-----|-----|-----|-----|-----|-----|-----|-----|-----|-----|-----|-----|-----|-----|-----|-----|-----|-----|-----|-----|-----|-----|-----|-----|-----|-----|-----|-----|-----|-----|-----|-----|-----|-----|-----|-----|-----|-----|-----|-----|-----|-----|-----|-----|-----|-----|-----|-----|-----|-----|-----|-----|-----|-----|-----|-----|-----|-----|-----|-----|-----|-----|-----|-----|-----|-----|-----|-----|-----|-----|-----|-----|-----|-----|-----|-----|-----|-----|-----|-----|-----|-----|-----|-----|-----|-----|-----|-----|-----|-----|-----|-----|-----|-----|-----|-----|-----|-----|-----|-----|-----|-----|-----|-----|-----|-----|-----|-----|-----|-----|-----|-----|-----|-----|-----|-----|-----|-----|-----|-----|-----|-----|-----|-----|-----|-----|-----|-----|-----|-----|-----|-----|-----|-----|-----|-----|-----|-----|-----|-----|-----|-----|-----|-----|-----|-----|-----|-----|-----|-----|-----|-----|-----|-----|-----|-----|-----|-----|-----|-----|-----|-----|-----|-----|-----|-----|-----|-----|-----|-----|-----|-----|-----|-----|-----|-----|-----|-----|-----|-----|-----|-----|-----|-----|-----|-----|-----|-----|-----|-----|-----|-----|-----|-----|-----|-----|-----|-----|-----|-----|-----|-----|-----|-----|-----|-----|-----|-----|-----|-----|-----|-----|-----|-----|-----|-----|-----|-----|-----|-----|-----|-----|-----|-----|-----|-----|-----|-----|-----|-----|-----|-----|-----|-----|-----|-----|-----|-----|-----|-----|-----|-----|-----|-----|-----|-----|-----|-----|-----|-----|-----|-----|-----|-----|-----|-----|-----|-----|-----|-----|-----|-----|-----|-----|-----|-----|-----|-----|-----|-----|-----|-----|-----|-----|-----|-----|-----|-----|-----|-----|-----|-----|-----|-----|-----|-----|-----|-----|-----|-----|-----|-----|-----|-----|-----|-----|-----|-----|-----|-----|-----|-----|-----|-----|-----|-----|-----|-----|-----|-----|-----|-----|-----|-----|-----|-----|
| 1 | 2 | 3 | 4 | 5 | 6 | 7 | 8 | 9 | 10 | 11 | 12 | 13 | 14 | 15 | 16 | 17 | 18 | 19 | 20 | 21 | 22 | 23 | 24 | 25 | 26 | 27 | 28 | 29 | 30 | 31 | 32 | 33 | 34 | 35 | 36 | 37 | 38 | 39 | 40 | 41 | 42 | 43 | 44 | 45 | 46 | 47 | 48 | 49 | 50 | 51 | 52 | 53 | 54 | 55 | 56 | 57 | 58 | 59 | 60 | 61 | 62 | 63 | 64 | 65 | 66 | 67 | 68 | 69 | 70 | 71 | 72 | 73 | 74 | 75 | 76 | 77 | 78 | 79 | 80 | 81 | 82 | 83 | 84 | 85 | 86 | 87 | 88 | 89 | 90 | 91 | 92 | 93 | 94 | 95 | 96 | 97 | 98 | 99 | 100 | 101 | 102 | 103 | 104 | 105 | 106 | 107 | 108 | 109 | 110 | 111 | 112 | 113 | 114 | 115 | 116 | 117 | 118 | 119 | 120 | 121 | 122 | 123 | 124 | 125 | 126 | 127 | 128 | 129 | 130 | 131 | 132 | 133 | 134 | 135 | 136 | 137 | 138 | 139 | 140 | 141 | 142 | 143 | 144 | 145 | 146 | 147 | 148 | 149 | 150 | 151 | 152 | 153 | 154 | 155 | 156 | 157 | 158 | 159 | 160 | 161 | 162 | 163 | 164 | 165 | 166 | 167 | 168 | 169 | 170 | 171 | 172 | 173 | 174 | 175 | 176 | 177 | 178 | 179 | 180 | 181 | 182 | 183 | 184 | 185 | 186 | 187 | 188 | 189 | 190 | 191 | 192 | 193 | 194 | 195 | 196 | 197 | 198 | 199 | 200 | 201 | 202 | 203 | 204 | 205 | 206 | 207 | 208 | 209 | 210 | 211 | 212 | 213 | 214 | 215 | 216 | 217 | 218 | 219 | 220 | 221 | 222 | 223 | 224 | 225 | 226 | 227 | 228 | 229 | 230 | 231 | 232 | 233 | 234 | 235 | 236 | 237 | 238 | 239 | 240 | 241 | 242 | 243 | 244 | 245 | 246 | 247 | 248 | 249 | 250 | 251 | 252 | 253 | 254 | 255 | 256 | 257 | 258 | 259 | 260 | 261 | 262 | 263 | 264 | 265 | 266 | 267 | 268 | 269 | 270 | 271 | 272 | 273 | 274 | 275 | 276 | 277 | 278 | 279 | 280 | 281 | 282 | 283 | 284 | 285 | 286 | 287 | 288 | 289 | 290 | 291 | 292 | 293 | 294 | 295 | 296 | 297 | 298 | 299 | 300 | 301 | 302 | 303 | 304 | 305 | 306 | 307 | 308 | 309 | 310 | 311 | 312 | 313 | 314 | 315 | 316 | 317 | 318 | 319 | 320 | 321 | 322 | 323 | 324 | 325 | 326 | 327 | 328 | 329 | 330 | 331 | 332 | 333 | 334 | 335 | 336 | 337 | 338 | 339 | 340 | 341 | 342 | 343 | 344 | 345 | 346 | 347 | 348 | 349 | 350 | 351 | 352 | 353 | 354 | 355 | 356 | 357 | 358 | 359 | 360 | 361 | 362 | 363 | 364 | 365 | 366 | 367 | 368 | 369 | 370 | 371 | 372 | 373 | 374 | 375 | 376 | 377 | 378 | 379 | 380 | 381 | 382 | 383 | 384 | 385 | 386 | 387 | 388 | 389 | 390 | 391 | 392 | 393 | 394 | 395 | 396 | 397 | 398 | 399 | 400 | 401 | 402 | 403 | 404 | 405 | 406 | 407 | 408 | 409 | 410 | 411 | 412 | 413 | 414 | 415 | 416 | 417 | 418 | 419 | 420 | 421 | 422 | 423 | 424 | 425 | 426 | 427 | 428 | 429 | 430 | 431 | 432 | 433 | 434 | 435 | 436 | 437 | 438 | 439 | 440 | 441 | 442 | 443 | 444 | 445 | 446 | 447 | 448 | 449 | 450 | 451 | 452 | 453 | 454 | 455 | 456 | 457 | 458 | 459 | 460 | 461 | 462 | 463 | 464 | 465 | 466 | 467 | 468 | 469 | 470 | 471 | 472 | 473 | 474 | 475 | 476 | 477 | 478 | 479 | 480 | 481 | 482 | 483 | 484 | 485 | 486 | 487 | 488 | 489 | 490 | 491 | 492 | 493 | 494 | 495 | 496 | 497 | 498 | 499 | 500 | 501 | 502 | 503 | 504 | 505 | 506 | 507 | 508 | 509 | 510 | 511 | 512 | 513 | 514 | 515 | 516 | 517 | 518 | 519 | 520 | 521 | 522 | 523 | 524 | 525 |
|---|---|---|---|---|---|---|---|---|----|----|----|----|----|----|----|----|----|----|----|----|----|----|----|----|----|----|----|----|----|----|----|----|----|----|----|----|----|----|----|----|----|----|----|----|----|----|----|----|----|----|----|----|----|----|----|----|----|----|----|----|----|----|----|----|----|----|----|----|----|----|----|----|----|----|----|----|----|----|----|----|----|----|----|----|----|----|----|----|----|----|----|----|----|----|----|----|----|----|-----|-----|-----|-----|-----|-----|-----|-----|-----|-----|-----|-----|-----|-----|-----|-----|-----|-----|-----|-----|-----|-----|-----|-----|-----|-----|-----|-----|-----|-----|-----|-----|-----|-----|-----|-----|-----|-----|-----|-----|-----|-----|-----|-----|-----|-----|-----|-----|-----|-----|-----|-----|-----|-----|-----|-----|-----|-----|-----|-----|-----|-----|-----|-----|-----|-----|-----|-----|-----|-----|-----|-----|-----|-----|-----|-----|-----|-----|-----|-----|-----|-----|-----|-----|-----|-----|-----|-----|-----|-----|-----|-----|-----|-----|-----|-----|-----|-----|-----|-----|-----|-----|-----|-----|-----|-----|-----|-----|-----|-----|-----|-----|-----|-----|-----|-----|-----|-----|-----|-----|-----|-----|-----|-----|-----|-----|-----|-----|-----|-----|-----|-----|-----|-----|-----|-----|-----|-----|-----|-----|-----|-----|-----|-----|-----|-----|-----|-----|-----|-----|-----|-----|-----|-----|-----|-----|-----|-----|-----|-----|-----|-----|-----|-----|-----|-----|-----|-----|-----|-----|-----|-----|-----|-----|-----|-----|-----|-----|-----|-----|-----|-----|-----|-----|-----|-----|-----|-----|-----|-----|-----|-----|-----|-----|-----|-----|-----|-----|-----|-----|-----|-----|-----|-----|-----|-----|-----|-----|-----|-----|-----|-----|-----|-----|-----|-----|-----|-----|-----|-----|-----|-----|-----|-----|-----|-----|-----|-----|-----|-----|-----|-----|-----|-----|-----|-----|-----|-----|-----|-----|-----|-----|-----|-----|-----|-----|-----|-----|-----|-----|-----|-----|-----|-----|-----|-----|-----|-----|-----|-----|-----|-----|-----|-----|-----|-----|-----|-----|-----|-----|-----|-----|-----|-----|-----|-----|-----|-----|-----|-----|-----|-----|-----|-----|-----|-----|-----|-----|-----|-----|-----|-----|-----|-----|-----|-----|-----|-----|-----|-----|-----|-----|-----|-----|-----|-----|-----|-----|-----|-----|-----|-----|-----|-----|-----|-----|-----|-----|-----|-----|-----|-----|-----|-----|-----|-----|-----|-----|-----|-----|-----|-----|-----|-----|-----|-----|-----|-----|-----|-----|-----|-----|-----|-----|-----|-----|-----|-----|-----|-----|-----|-----|-----|-----|-----|-----|-----|-----|-----|-----|-----|-----|-----|-----|-----|-----|-----|-----|-----|-----|-----|-----|-----|-----|-----|-----|-----|-----|-----|-----|-----|-----|-----|-----|-----|-----|-----|-----|-----|-----|-----|-----|-----|-----|-----|-----|-----|-----|-----|-----|-----|-----|-----|-----|-----|-----|-----|-----|-----|-----|-----|-----|-----|-----|-----|-----|-----|-----|-----|-----|-----|-----|-----|-----|-----|-----|

|     |      |        |           |
|-----|------|--------|-----------|
| SNP | 227  | 45.40% | 1.30E-140 |
| SNP | 268  | 37.30% | 1.40E-145 |
| SNP | 316  | 78.50% | 0         |
| SNP | 347  | 34.30% | 1.30E-167 |
| SNP | 401  | 27.90% | 3.20E-168 |
| SNP | 436  | 35.80% | 0         |
| SNP | 547  | 25.60% | 3.40E-287 |
| SNP | 582  | 47.40% | 0         |
| SNP | 641  | 33.20% | 3.00E-232 |
| SNP | 649  | 41.30% | 0         |
| SNP | 700  | 39.40% | 0         |
| SNP | 985  | 56.30% | 0         |
| SNP | 1009 | 58.90% | 0         |
| SNP | 1049 | 78.50% | 0         |
| SNP | 1057 | 53.20% | 0         |
| SNP | 1115 | 56.80% | 0         |
| SNP | 1132 | 25.70% | 0         |
| SNP | 1132 | 44.80% | 0         |
| SNP | 1144 | 36.50% | 0         |
| SNP | 1247 | 33.00% | 0         |
| SNP | 1247 | 29.60% | 0         |
| SNP | 1258 | 30.20% | 0         |

|                                    |   |     |     |   |        |      |                       |        |   |
|------------------------------------|---|-----|-----|---|--------|------|-----------------------|--------|---|
| Variants:                          |   |     |     |   |        |      |                       |        |   |
| VaAphrodite_C_FDSW210055<br>059-1r | A | 423 | 423 | 1 | G -> A | 1255 | SNP<br>(transition)   | 61.90% | 0 |
| Variants:                          |   |     |     |   |        |      |                       |        |   |
| VaAphrodite_C_FDSW210055<br>059-1r | A | 426 | 426 | 1 | G -> A | 1271 | SNP<br>(transition)   | 61.70% | 0 |
| Variants:                          |   |     |     |   |        |      |                       |        |   |
| VaAphrodite_C_FDSW210055<br>059-1r | G | 438 | 438 | 1 | A -> G | 1278 | SNP<br>(transition)   | 47.60% | 0 |
| Variants:                          |   |     |     |   |        |      |                       |        |   |
| VaAphrodite_C_FDSW210055<br>059-1r | A | 456 | 456 | 1 | G -> A | 1246 | SNP<br>(transition)   | 46.10% | 0 |
| Variants:                          |   |     |     |   |        |      |                       |        |   |
| VaAphrodite_C_FDSW210055<br>059-1r | C | 462 | 462 | 1 | T -> C | 1231 | SNP<br>(transition)   | 25.80% | 0 |
| Variants:                          |   |     |     |   |        |      |                       |        |   |
| VaAphrodite_C_FDSW210055<br>059-1r | G | 469 | 469 | 1 | C -> G | 1242 | SNP<br>(transversion) | 25.70% | 0 |
| Variants:                          |   |     |     |   |        |      |                       |        |   |
| VaAphrodite_C_FDSW210055<br>059-1r | C | 489 | 489 | 1 | T -> C | 1215 | SNP<br>(transition)   | 44.80% | 0 |
| Variants:                          |   |     |     |   |        |      |                       |        |   |
| VaAphrodite_C_FDSW210055<br>059-1r | C | 498 | 498 | 1 | G -> C | 1165 | SNP<br>(transversion) | 31.80% | 0 |
| Variants:                          |   |     |     |   |        |      |                       |        |   |
| VaAphrodite_C_FDSW210055<br>059-1r | C | 513 | 513 | 1 | T -> C | 1095 | SNP<br>(transition)   | 51.70% | 0 |
| Variants:                          |   |     |     |   |        |      |                       |        |   |
| VaAphrodite_C_FDSW210055<br>059-1r | C | 516 | 516 | 1 | T -> C | 1075 | SNP<br>(transition)   | 33.20% | 0 |
| Variants:                          |   |     |     |   |        |      |                       |        |   |
| VaAphrodite_C_FDSW210055<br>059-1r | T | 531 | 531 | 1 | C -> T | 1048 | SNP<br>(transition)   | 30.80% | 0 |
| Variants:                          |   |     |     |   |        |      |                       |        |   |
| VaAphrodite_C_FDSW210055<br>059-1r | C | 537 | 537 | 1 | G -> C | 1035 | SNP<br>(transversion) | 57.80% | 0 |
| Variants:                          |   |     |     |   |        |      |                       |        |   |
| VaAphrodite_C_FDSW210055<br>059-1r | G | 540 | 540 | 1 | A -> G | 1029 | SNP<br>(transition)   | 34.20% | 0 |
| Variants:                          |   |     |     |   |        |      |                       |        |   |
| VaAphrodite_C_FDSW210055<br>059-1r | A | 552 | 552 | 1 | T -> A | 1015 | SNP<br>(transversion) | 38.40% | 0 |
| Variants:                          |   |     |     |   |        |      |                       |        |   |
| VaAphrodite_C_FDSW210055<br>059-1r | A | 564 | 564 | 1 | C -> A | 972  | SNP<br>(transversion) | 31.30% | 0 |
| Variants:                          |   |     |     |   |        |      |                       |        |   |
| VaAphrodite_C_FDSW210055<br>059-1r | G | 588 | 588 | 1 | A -> G | 886  | SNP<br>(transition)   | 36.20% | 0 |
| Variants:                          |   |     |     |   |        |      |                       |        |   |
| VaAphrodite_C_FDSW210055<br>059-1r | C | 663 | 663 | 1 | T -> C | 561  | SNP<br>(transition)   | 78.60% | 0 |
| Variants:                          |   |     |     |   |        |      |                       |        |   |
| VaAphrodite_C_FDSW210055<br>059-1r | G | 677 | 677 | 1 | A -> G | 469  | SNP<br>(transition)   | 80.40% | 0 |
| Variants:                          |   |     |     |   |        |      |                       |        |   |
| VaAphrodite_C_FDSW210055<br>059-1r | C | 684 | 684 | 1 | T -> C | 429  | SNP<br>(transition)   | 77.40% | 0 |
| Variants:                          |   |     |     |   |        |      |                       |        |   |
| VaAphrodite_C_FDSW210055<br>059-1r | A | 687 | 687 | 1 | G -> A | 408  | SNP<br>(transition)   | 78.70% | 0 |
| Variants:                          |   |     |     |   |        |      |                       |        |   |
| VaAphrodite_C_FDSW210055<br>059-1r | T | 690 | 690 | 1 | A -> T | 390  | SNP<br>(transversion) | 82.60% | 0 |
| Variants:                          |   |     |     |   |        |      |                       |        |   |
| VaAphrodite_C_FDSW210055<br>059-1r | A | 693 | 693 | 1 | G -> A | 370  | SNP<br>(transition)   | 81.60% | 0 |

|                                                  |         |     |     |   |                    |               |                       |                   |           |        |                             |                          |                  |                |  |  |  |  |  |
|--------------------------------------------------|---------|-----|-----|---|--------------------|---------------|-----------------------|-------------------|-----------|--------|-----------------------------|--------------------------|------------------|----------------|--|--|--|--|--|
| Variables:<br>VaAphrodite_C_FDSW210055<br>059-1r | A       | 708 | 708 | 1 | G -> A             | 284           | SNP<br>(transition)   | 82.40%            | 0         |        |                             |                          |                  |                |  |  |  |  |  |
| Variables:<br>VaAphrodite_C_FDSW210055<br>059-1r | T       | 723 | 723 | 1 | C -> T             | 225           | SNP<br>(transition)   | 84.00%            | 0         |        |                             |                          |                  |                |  |  |  |  |  |
| Variables:<br>VaAphrodite_C_FDSW210055<br>059-1r | C       | 726 | 726 | 1 | T -> C             | 214           | SNP<br>(transition)   | 84.10%            | 0         |        |                             |                          |                  |                |  |  |  |  |  |
| Variables:<br>VaAphrodite_C_FDSW210055<br>059-1r | AC      | 745 | 746 | 2 | GA -> AC           | 156 -><br>160 | Substitution          | 25.6% -><br>28.8% | 5.50E-65  |        |                             |                          |                  |                |  |  |  |  |  |
| Variables:<br>VaAphrodite_C_FDSW210055<br>059-1r | C       | 747 | 747 | 1 | T -> C             | 159           | SNP<br>(transition)   | 67.90%            | 2.20E-293 |        |                             |                          |                  |                |  |  |  |  |  |
| Variables:<br>VaAphrodite_C_FDSW210055<br>059-1r | CGTTCGA | 749 | 755 | 7 | TACCTTG -> CGTTCGA | 163 -><br>174 | Substitution          | 40.2% -><br>58.9% | 1.40E-169 |        |                             |                          |                  |                |  |  |  |  |  |
| Variables:<br>VaAphrodite_C_FDSW210055<br>059-1r | C       | 756 | 756 | 1 | G -> C             | 178           | SNP<br>(transversion) | 37.60%            | 8.70E-152 |        |                             |                          |                  |                |  |  |  |  |  |
| Variables:<br>VaAphrodite_C_FDSW210055<br>059-1r | T       | 756 | 756 | 1 | G -> T             | 178           | SNP<br>(transversion) | 41.60%            | 4.00E-164 |        |                             |                          |                  |                |  |  |  |  |  |
| Variables:<br>VaAphrodite_C_FDSW210055<br>059-1r | AGCG    | 757 | 760 | 4 | TCAC -> AGCG       | 171 -><br>176 | Substitution          | 25.7% -><br>37.5% | 3.20E-76  |        |                             |                          |                  |                |  |  |  |  |  |
| Variables:<br>VaAphrodite_C_FDSW210055<br>059-1r | T       | 765 | 765 | 1 | C -> T             | 172           | SNP<br>(transition)   | 33.10%            | 1.50E-74  |        |                             |                          |                  |                |  |  |  |  |  |
| Variables:<br>VaAphrodite_C_FDSW210055<br>059-1r | A       | 768 | 768 | 1 | T -> A             | 176           | SNP<br>(transversion) | 56.30%            | 1.40E-246 |        |                             |                          |                  |                |  |  |  |  |  |
| Variables:<br>VaAphrodite_C_FDSW210055<br>059-1r | T       | 790 | 790 | 1 | G -> T             | 296           | SNP<br>(transversion) | 27.00%            | 2.70E-127 | R -> L | hypothetical<br>protein CDS | hypothetica<br>l protein | Substituti<br>on | KLI69<br>879.1 |  |  |  |  |  |
| Variables:<br>VaAphrodite_C_FDSW210055<br>059-1r | A       | 795 | 795 | 1 | G -> A             | 337           | SNP<br>(transition)   | 59.60%            | 0         | A -> T | hypothetical<br>protein CDS | hypothetica<br>l protein | Substituti<br>on | KLI69<br>879.1 |  |  |  |  |  |
| Variables:<br>VaAphrodite_C_FDSW210055<br>059-1r | AAT     | 801 | 803 | 2 | CAC -> AAT         | 379 -><br>395 | Substitution          | 73.4% -><br>76.5% | 0         | H -> N | hypothetical<br>protein CDS | hypothetica<br>l protein | Substituti<br>on | KLI69<br>879.1 |  |  |  |  |  |
| Variables:<br>VaAphrodite_C_FDSW210055<br>059-1r | C       | 834 | 834 | 1 | T -> C             | 543           | SNP<br>(transition)   | 79.00%            | 0         | Y -> H | hypothetical<br>protein CDS | hypothetica<br>l protein | Substituti<br>on | KLI69<br>879.1 |  |  |  |  |  |
| Variables:<br>VaAphrodite_C_FDSW210055<br>059-1r | G       | 888 | 888 | 1 | A -> G             | 814           | SNP<br>(transition)   | 32.60%            | 0         | I -> V | hypothetical<br>protein CDS | hypothetica<br>l protein | Substituti<br>on | KLI69<br>879.1 |  |  |  |  |  |
| Variables:<br>VaAphrodite_C_FDSW210055<br>059-1r | C       | 897 | 897 | 1 | T -> C             | 823           | SNP<br>(transition)   | 61.50%            | 0         | C -> R | hypothetical<br>protein CDS | hypothetica<br>l protein | Substituti<br>on | KLI69<br>879.1 |  |  |  |  |  |
| Variables:<br>VaAphrodite_C_FDSW210055<br>059-1r | C       | 900 | 900 | 1 | G -> C             | 818           | SNP<br>(transversion) | 61.60%            | 0         | D -> H | hypothetical<br>protein CDS | hypothetica<br>l protein | Substituti<br>on | KLI69<br>879.1 |  |  |  |  |  |
| Variables:<br>VaAphrodite_C_FDSW210055<br>059-1r | C       | 942 | 942 | 1 | G -> C             | 790           | SNP<br>(transversion) | 32.40%            | 0         | G -> R | hypothetical<br>protein CDS | hypothetica<br>l protein | Substituti<br>on | KLI69<br>879.1 |  |  |  |  |  |
| Variables:<br>VaAphrodite_C_FDSW210055<br>059-1r | TGT     | 966 | 968 | 2 | AGC -> TGT         | 711 -><br>714 | Substitution          | 45.3% -><br>46.5% | 0         | S -> C | hypothetical<br>protein CDS | hypothetica<br>l protein | Substituti<br>on | KLI69<br>879.1 |  |  |  |  |  |
| Variables:<br>VaAphrodite_C_FDSW210055<br>059-1r | G       | 969 | 969 | 1 | C -> G             | 716           | SNP<br>(transversion) | 29.10%            | 2.50E-294 | P -> A | hypothetical<br>protein CDS | hypothetica<br>l protein | Substituti<br>on | KLI69<br>879.1 |  |  |  |  |  |
| Variables:<br>VaAphrodite_C_FDSW210055<br>059-1r | A       | 976 | 976 | 1 | T -> A             | 711           | SNP<br>(transversion) | 29.50%            | 1.50E-257 | V -> E | hypothetical<br>protein CDS | hypothetica<br>l protein | Substituti<br>on | KLI69<br>879.1 |  |  |  |  |  |

|                                                  |      |      |      |   |              |               |                       |                   |           |          |                             |                          |                  |                |
|--------------------------------------------------|------|------|------|---|--------------|---------------|-----------------------|-------------------|-----------|----------|-----------------------------|--------------------------|------------------|----------------|
| Variables:<br>VaAphrodite_C_FDSW210055<br>059-1r | A    | 1008 | 1008 | 1 | G -> A       | 669           | SNP<br>(transition)   | 32.70%            | 4.60E-237 | V -> I   | hypothetical<br>protein CDS | hypothetica<br>l protein | Substituti<br>on | KLI69<br>879.1 |
| Variables:<br>VaAphrodite_C_FDSW210055<br>059-1r | C    | 1035 | 1035 | 1 | G -> C       | 689           | SNP<br>(transversion) | 27.60%            | 7.70E-283 | G -> R   | hypothetical<br>protein CDS | hypothetica<br>l protein | Substituti<br>on | KLI69<br>879.1 |
| Variables:<br>VaAphrodite_C_FDSW210055<br>059-1r | A    | 1041 | 1041 | 1 | G -> A       | 685           | SNP<br>(transition)   | 32.70%            | 0         | A -> T   | hypothetical<br>protein CDS | hypothetica<br>l protein | Substituti<br>on | KLI69<br>879.1 |
| Variables:<br>VaAphrodite_C_FDSW210055<br>059-1r | C    | 1049 | 1049 | 1 | T -> C       | 700           | SNP<br>(transition)   | 25.40%            | 0         |          | hypothetical<br>protein CDS | hypothetica<br>l protein | None             | KLI69<br>879.1 |
| Variables:<br>VaAphrodite_C_FDSW210055<br>059-1r | G    | 1083 | 1083 | 1 | A -> G       | 726           | SNP<br>(transition)   | 32.90%            | 0         | K -> E   | hypothetical<br>protein CDS | hypothetica<br>l protein | Substituti<br>on | KLI69<br>879.1 |
| Variables:<br>VaAphrodite_C_FDSW210055<br>059-1r | A    | 1100 | 1100 | 1 | G -> A       | 738           | SNP<br>(transition)   | 33.60%            | 0         |          | hypothetical<br>protein CDS | hypothetica<br>l protein | None             | KLI69<br>879.1 |
| Variables:<br>VaAphrodite_C_FDSW210055<br>059-1r | A    | 1101 | 1101 | 1 | G -> A       | 741           | SNP<br>(transition)   | 30.80%            | 0         |          |                             |                          |                  |                |
| Variables:<br>VaAphrodite_C_FDSW210055<br>059-1r | C    | 1104 | 1104 | 1 | G -> C       | 757           | SNP<br>(transversion) | 33.90%            | 0         |          |                             |                          |                  |                |
| Variables:<br>VaAphrodite_C_FDSW210055<br>059-1r | T    | 1116 | 1116 | 1 | C -> T       | 790           | SNP<br>(transition)   | 35.40%            | 0         |          | hypothetical<br>protein CDS | hypothetica<br>l protein | None             | KLI69<br>880.1 |
| Variables:<br>VaAphrodite_C_FDSW210055<br>059-1r | T    | 1119 | 1119 | 1 | C -> T       | 787           | SNP<br>(transition)   | 33.30%            | 0         |          | hypothetical<br>protein CDS | hypothetica<br>l protein | None             | KLI69<br>880.1 |
| Variables:<br>VaAphrodite_C_FDSW210055<br>059-1r | G    | 1135 | 1135 | 1 | T -> G       | 805           | SNP<br>(transversion) | 61.00%            | 0         | F -> V   | hypothetical<br>protein CDS | hypothetica<br>l protein | Substituti<br>on | KLI69<br>880.1 |
| Variables:<br>VaAphrodite_C_FDSW210055<br>059-1r | TGTG | 1173 | 1176 | 3 | CATA -> TGTG | 722 -><br>742 | Substitution          | 34.6% -><br>35.9% | 0         | TI -> TV | hypothetical<br>protein CDS | hypothetica<br>l protein | Substituti<br>on | KLI69<br>880.1 |
| Variables:<br>VaAphrodite_C_FDSW210055<br>059-1r | C    | 1182 | 1182 | 1 | T -> C       | 708           | SNP<br>(transition)   | 35.20%            | 0         |          | hypothetical<br>protein CDS | hypothetica<br>l protein | None             | KLI69<br>880.1 |
| Variables:<br>VaAphrodite_C_FDSW210055<br>059-1r | G    | 1194 | 1194 | 1 | A -> G       | 699           | SNP<br>(transition)   | 31.30%            | 0         |          | hypothetical<br>protein CDS | hypothetica<br>l protein | None             | KLI69<br>880.1 |
| Variables:<br>VaAphrodite_C_FDSW210055<br>059-1r | G    | 1215 | 1215 | 1 | A -> G       | 560           | SNP<br>(transition)   | 43.80%            | 0         |          | hypothetical<br>protein CDS | hypothetica<br>l protein | None             | KLI69<br>880.1 |
| Variables:<br>VaAphrodite_C_FDSW210055<br>059-1r | G    | 1218 | 1218 | 1 | A -> G       | 548           | SNP<br>(transition)   | 43.10%            | 0         |          | hypothetical<br>protein CDS | hypothetica<br>l protein | None             | KLI69<br>880.1 |
| Variables:<br>VaAphrodite_C_FDSW210055<br>059-1r | G    | 1221 | 1221 | 1 | C -> G       | 536           | SNP<br>(transversion) | 43.10%            | 0         |          | hypothetical<br>protein CDS | hypothetica<br>l protein | None             | KLI69<br>880.1 |
| Variables:<br>VaAphrodite_C_FDSW210055<br>059-1r | GG   | 1232 | 1233 | 2 | AC -> GG     | 484 -><br>490 | Substitution          | 42.1% -><br>42.2% | 0         | N -> R   | hypothetical<br>protein CDS | hypothetica<br>l protein | Substituti<br>on | KLI69<br>880.1 |
| Variables:<br>VaAphrodite_C_FDSW210055<br>059-1r | T    | 1235 | 1235 | 1 | C -> T       | 477           | SNP<br>(transition)   | 41.90%            | 0         | A -> V   | hypothetical<br>protein CDS | hypothetica<br>l protein | Substituti<br>on | KLI69<br>880.1 |
| Variables:<br>VaAphrodite_C_FDSW210055<br>059-1r | A    | 1262 | 1262 | 1 | G -> A       | 305           | SNP<br>(transition)   | 30.20%            | 9.10E-234 | G -> E   | hypothetical<br>protein CDS | hypothetica<br>l protein | Substituti<br>on | KLI69<br>880.1 |
| Variables:<br>VaAphrodite_C_FDSW210055<br>059-1r | G    | 1269 | 1269 | 1 | A -> G       | 272           | SNP<br>(transition)   | 61.00%            | 0         | I -> M   | hypothetical<br>protein CDS | hypothetica<br>l protein | Substituti<br>on | KLI69<br>880.1 |
| Variables:<br>VaAphrodite_C_FDSW210055<br>059-1r | G    | 1275 | 1275 | 1 | A -> G       | 241           | SNP<br>(transition)   | 64.30%            | 0         |          | hypothetical<br>protein CDS | hypothetica<br>l protein | None             | KLI69<br>880.1 |

|                                                 |      |      |      |   |              |               |                       |                   |           |          |  |                             |                          |                  |                |
|-------------------------------------------------|------|------|------|---|--------------|---------------|-----------------------|-------------------|-----------|----------|--|-----------------------------|--------------------------|------------------|----------------|
| Variants:<br>VaAphrodite_C_FDSW210055<br>059-1r | T    | 1287 | 1287 | 1 | A -> T       | 187           | SNP<br>(transversion) | 64.70%            |           | 0        |  | hypothetical<br>protein CDS | hypothetica<br>l protein | None             | KLI69<br>880.1 |
| Variants:<br>VaAphrodite_C_FDSW210055<br>059-1r | T    | 1290 | 1290 | 1 | C -> T       | 178           | SNP<br>(transition)   | 63.50%            | 1.60E-301 |          |  | hypothetical<br>protein CDS | hypothetica<br>l protein | None             | KLI69<br>880.1 |
| Variants:<br>VaAphrodite_C_FDSW210055<br>059-1r | G    | 1293 | 1293 | 1 | C -> G       | 162           | SNP<br>(transversion) | 65.40%            | 9.20E-296 | D -> E   |  | hypothetical<br>protein CDS | hypothetica<br>l protein | Substituti<br>on | KLI69<br>880.1 |
| Variants:<br>VaAphrodite_C_FDSW210055<br>059-1r | ATTG | 1296 | 1299 | 4 | CAAC -> ATTG | 144 -><br>151 | Substitution          | 64.9% -><br>66.7% | 1.10E-261 | TN -> TL |  | hypothetical<br>protein CDS | hypothetica<br>l protein | Substituti<br>on | KLI69<br>880.1 |
| Variants:<br>VaAphrodite_C_FDSW210055<br>059-1r | A    | 1305 | 1305 | 1 | G -> A       | 135           | SNP<br>(transition)   | 66.70%            | 1.50E-252 |          |  | hypothetical<br>protein CDS | hypothetica<br>l protein | None             | KLI69<br>880.1 |
| Variants:<br>VaAphrodite_C_FDSW210055<br>059-1r | A    | 1311 | 1311 | 1 | G -> A       | 119           | SNP<br>(transition)   | 51.30%            | 2.80E-161 |          |  | hypothetical<br>protein CDS | hypothetica<br>l protein | None             | KLI69<br>880.1 |
| Variants:<br>VaAphrodite_C_FDSW210055<br>059-1r | T    | 1314 | 1314 | 1 | G -> T       | 115           | SNP<br>(transversion) | 52.20%            | 2.70E-159 |          |  | hypothetical<br>protein CDS | hypothetica<br>l protein | None             | KLI69<br>880.1 |
| Variants:<br>VaAphrodite_C_FDSW210055<br>059-1r | G    | 1317 | 1317 | 1 | C -> G       | 112           | SNP<br>(transversion) | 50.90%            | 1.50E-150 | D -> E   |  | hypothetical<br>protein CDS | hypothetica<br>l protein | Substituti<br>on | KLI69<br>880.1 |
| Variants:<br>VaAphrodite_C_FDSW210055<br>059-1r | GCTA | 1320 | 1323 | 4 | TGAG -> GCTA | 91 -><br>99   | Substitution          | 61.2% -><br>62.6% | 2.70E-135 | TE -> TL |  | hypothetical<br>protein CDS | hypothetica<br>l protein | Substituti<br>on | KLI69<br>880.1 |
| Variants:<br>VaAphrodite_C_FDSW210055<br>059-1r | A    | 1324 | 1324 | 1 | C -> A       | 91            | SNP<br>(transversion) | 62.60%            | 3.40E-167 | H -> N   |  | hypothetical<br>protein CDS | hypothetica<br>l protein | Substituti<br>on | KLI69<br>880.1 |
| Variants:<br>VaAphrodite_C_FDSW210055<br>059-1r | AAG  | 1324 | 1326 | 2 | CAC -> AAG   | 91 -><br>92   | Substitution          | 31.5% -><br>31.9% | 8.50E-67  | H -> K   |  | hypothetical<br>protein CDS | hypothetica<br>l protein | Substituti<br>on | KLI69<br>880.1 |
| Variants:<br>VaAphrodite_C_FDSW210055<br>059-1r | TT   | 1327 | 1328 | 2 | AC -> TT     | 81 -><br>86   | Substitution          | 29.6% -><br>30.2% | 4.70E-49  | T -> F   |  | hypothetical<br>protein CDS | hypothetica<br>l protein | Substituti<br>on | KLI69<br>880.1 |
| Variants:<br>VaAphrodite_C_FDSW210055<br>059-1r | G    | 1327 | 1329 | 3 | ACC -> G     | 77 -><br>86   | Deletion              | 50.0% -><br>55.8% | 2.60E-38  |          |  | hypothetical<br>protein CDS | hypothetica<br>l protein | Frame<br>Shift   | KLI69<br>880.1 |
| Variants:<br>VaAphrodite_C_FDSW210055<br>059-1r | A    | 1330 | 1330 | 1 | T -> A       | 76            | SNP<br>(transversion) | 26.30%            | 1.00E-40  | L -> I   |  | hypothetical<br>protein CDS | hypothetica<br>l protein | Substituti<br>on | KLI69<br>880.1 |
| Variants:<br>VaAphrodite_C_FDSW210055<br>059-1r | TCAC | 1335 | 1338 | 3 | AGAG -> TCAC | 61 -><br>74   | Substitution          | 45.9% -><br>47.3% | 1.20E-64  | TE -> TH |  | hypothetical<br>protein CDS | hypothetica<br>l protein | Substituti<br>on | KLI69<br>880.1 |
| Variants:<br>VaAphrodite_C_FDSW210055<br>059-1r | A    | 1340 | 1340 | 1 | G -> A       | 57            | SNP<br>(transition)   | 43.90%            | 9.60E-60  | R -> H   |  | hypothetical<br>protein CDS | hypothetica<br>l protein | Substituti<br>on | KLI69<br>880.1 |
| Variants:<br>VaAphrodite_C_FDSW210055<br>059-1r | CG   | 1342 | 1343 | 2 | TA -> CG     | 51 -><br>54   | Substitution          | 24.1% -><br>25.5% | 1.00E-33  |          |  | hypothetical<br>protein CDS | hypothetica<br>l protein | Extension        | KLI69<br>880.1 |
| Variants:<br>VaAphrodite_C_FDSW210055<br>059-1r | C    | 1345 | 1345 | 1 | G -> C       | 42            | SNP<br>(transversion) | 28.60%            | 2.70E-24  |          |  |                             |                          |                  |                |
| Variants:<br>VaAphrodite_C_FDSW210055<br>059-1r | A    | 2111 | 2111 | 1 | T -> A       | 44            | SNP<br>(transversion) | 27.30%            | 1.30E-33  | I -> N   |  | hypothetical<br>protein CDS | hypothetica<br>l protein | Substituti<br>on | KLI69<br>881.1 |
| Variants:<br>VaAphrodite_C_FDSW210055<br>059-1r | C    | 2114 | 2114 | 1 | A -> C       | 43            | SNP<br>(transversion) | 32.60%            | 3.10E-40  | D -> A   |  | hypothetical<br>protein CDS | hypothetica<br>l protein | Substituti<br>on | KLI69<br>881.1 |
| Variants:<br>VaAphrodite_C_FDSW210055<br>059-1r | GAA  | 2116 | 2118 | 3 | TTT -> GAA   | 48 -><br>49   | Substitution          | 26.5% -><br>27.1% | 5.80E-38  | F -> E   |  | hypothetical<br>protein CDS | hypothetica<br>l protein | Substituti<br>on | KLI69<br>881.1 |
| Variants:<br>VaAphrodite_C_FDSW210055<br>059-1r | ACG  | 2119 | 2121 | 3 | GAA -> ACG   | 46 -><br>50   | Substitution          | 34.0% -><br>37.0% | 8.10E-51  | E -> T   |  | hypothetical<br>protein CDS | hypothetica<br>l protein | Substituti<br>on | KLI69<br>881.1 |

|                                                 |       |      |      |   |                |             |                       |                   |  |           |          |                             |                          |                  |                |
|-------------------------------------------------|-------|------|------|---|----------------|-------------|-----------------------|-------------------|--|-----------|----------|-----------------------------|--------------------------|------------------|----------------|
| Variants:<br>VaAphrodite_C_FDSW210055<br>059-1r | GATGA | 2122 | 2126 | 4 | AAAAT -> GATGA | 50 -><br>51 | Substitution          | 44.0% -><br>54.9% |  | 1.40E-61  | KI -> DD | hypothetical<br>protein CDS | hypothetica<br>l protein | Substituti<br>on | KLI69<br>881.1 |
| Variants:<br>VaAphrodite_C_FDSW210055<br>059-1r | AA    | 2128 | 2129 | 2 | GC -> AA       | 51 -><br>53 | Substitution          | 60.4% -><br>62.7% |  | 1.20E-92  | A -> N   | hypothetical<br>protein CDS | hypothetica<br>l protein | Substituti<br>on | KLI69<br>881.1 |
| Variants:<br>VaAphrodite_C_FDSW210055<br>059-1r | CAC   | 2131 | 2133 | 2 | TAA -> CAC     | 49 -><br>51 | Substitution          | 66.7% -><br>69.4% |  | 1.60E-107 |          | hypothetical<br>protein CDS | hypothetica<br>l protein | Extension        | KLI69<br>881.1 |
| Variants:<br>VaAphrodite_C_FDSW210055<br>059-1r | T     | 2135 | 2135 | 1 | A -> T         |             | SNP<br>(transversion) | 80.00%            |  | 1.00E-122 |          |                             |                          |                  |                |
| Variants:<br>VaAphrodite_C_FDSW210055<br>059-1r | CTG   | 2137 | 2139 | 3 | AGC -> CTG     | 54 -><br>55 | Substitution          | 76.4% -><br>77.8% |  | 5.40E-132 |          |                             |                          |                  |                |
| Variants:<br>VaAphrodite_C_FDSW210055<br>059-1r | A     | 2141 | 2141 | 1 | T -> A         |             | SNP<br>(transversion) | 68.30%            |  | 1.30E-116 |          |                             |                          |                  |                |
| Variants:<br>VaAphrodite_C_FDSW210055<br>059-1r | G     | 2141 | 2141 | 1 | T -> G         |             | SNP<br>(transversion) | 28.30%            |  | 1.20E-45  |          |                             |                          |                  |                |
| Variants:<br>VaAphrodite_C_FDSW210055<br>059-1r | G     | 2142 | 2142 | 1 | T -> G         |             | SNP<br>(transversion) | 68.90%            |  | 4.70E-128 |          |                             |                          |                  |                |
| Variants:<br>VaAphrodite_C_FDSW210055<br>059-1r | AG    | 2143 | 2144 | 2 | TA -> AG       |             | Substitution          | 30.60%            |  | 1.70E-53  |          |                             |                          |                  |                |
| Variants:<br>VaAphrodite_C_FDSW210055<br>059-1r | G     | 2145 | 2145 | 1 | A -> G         |             | SNP<br>(transition)   | 98.40%            |  | 2.00E-212 |          |                             |                          |                  |                |
| Variants:<br>VaAphrodite_C_FDSW210055<br>059-1r | T     | 2146 | 2146 | 1 | G -> T         |             | SNP<br>(transversion) | 30.60%            |  | 1.30E-51  |          |                             |                          |                  |                |
| Variants:<br>VaAphrodite_C_FDSW210055<br>059-1r | G     | 2147 | 2147 | 1 | A -> G         |             | SNP<br>(transition)   | 32.80%            |  | 1.60E-55  |          |                             |                          |                  |                |
| Variants:<br>VaAphrodite_C_FDSW210055<br>059-1r | T     | 2147 | 2147 | 1 | A -> T         |             | SNP<br>(transversion) | 65.60%            |  | 1.30E-126 |          |                             |                          |                  |                |
| Variants:<br>VaAphrodite_C_FDSW210055<br>059-1r | G     | 2149 | 2148 | 0 | #NAME?         |             | Insertion             | 61.20%            |  | 1.10E-121 |          |                             |                          |                  |                |
| Variants:<br>VaAphrodite_C_FDSW210055<br>059-1r | GAG   | 2902 | 2904 | 3 | TGA -> GAG     | 22 -><br>26 | Substitution          | 86.4% -><br>88.5% |  | 7.70E-49  |          |                             |                          |                  |                |
| Variants:<br>VaAphrodite_C_FDSW210055<br>059-1r | GGA   | 2906 | 2908 | 3 | TCG -> GGA     |             | Substitution          | 70.0% -><br>85.0% |  | 1.50E-32  |          |                             |                          |                  |                |
| Variants:<br>VaAphrodite_C_FDSW210055<br>059-1r | GGGA  | 2910 | 2913 | 4 | AACG -> GGGA   | 20 -><br>22 | Substitution          | 55.0% -><br>59.1% |  | 1.20E-18  |          |                             |                          |                  |                |
| Variants: VaAphrodite_C_FDSW210055059-1r        |       | 3097 | 3097 | 1 | #NAME?         |             | Deletion              | 46.60%            |  | 2.20E-149 |          |                             |                          |                  |                |
| Variants:<br>VaAphrodite_C_FDSW210055<br>059-1r | AG    | 3451 | 3452 | 2 | GT -> AG       | 15 -><br>16 | Substitution          | 31.3% -><br>33.3% |  | 4.00E-07  |          |                             |                          |                  |                |
| Variants:<br>VaAphrodite_C_FDSW210055<br>059-1r | T     | 3659 | 3659 | 1 | G -> T         |             | SNP<br>(transversion) | 53.00%            |  | 0         |          |                             |                          |                  |                |
| Variants:<br>VaAphrodite_C_FDSW210055<br>059-1r | C     | 3758 | 3758 | 1 | A -> C         |             | SNP<br>(transversion) | 51.70%            |  | 0         |          |                             |                          |                  |                |
| Variants:<br>VaAphrodite_C_FDSW210055<br>059-1r | G     | 3778 | 3778 | 1 | A -> G         |             | SNP<br>(transition)   | 47.10%            |  | 0         |          |                             |                          |                  |                |

|                                                 |             |      |      |   |                          |               |     |                       |                |  |           |              |                          |                       |                  |  |             |  |
|-------------------------------------------------|-------------|------|------|---|--------------------------|---------------|-----|-----------------------|----------------|--|-----------|--------------|--------------------------|-----------------------|------------------|--|-------------|--|
| Variants:<br>VaAphrodite_C_FDSW210055<br>059-1r | T           | 3780 | 3780 | 1 | C -> T                   |               | 368 | SNP<br>(transition)   | 46.70%         |  | 0         |              |                          |                       |                  |  |             |  |
| Variants:<br>VaAphrodite_C_FDSW210055<br>059-1r | C           | 3852 | 3852 | 1 | T -> C                   |               | 392 | SNP<br>(transition)   | 50.80%         |  | 0         |              |                          |                       |                  |  |             |  |
| Variants:<br>VaAphrodite_C_FDSW210055<br>059-1r | G           | 3864 | 3864 | 1 | A -> G                   |               | 381 | SNP<br>(transition)   | 50.90%         |  | 0         |              |                          |                       |                  |  |             |  |
| Variants:<br>VaAphrodite_C_FDSW210055<br>059-1r | T           | 3922 | 3922 | 1 | C -> T                   |               | 283 | SNP<br>(transition)   | 43.80%         |  | 0         |              |                          |                       |                  |  |             |  |
| Variants:<br>VaAphrodite_C_FDSW210055<br>059-1r | T           | 4022 | 4022 | 1 | G -> T                   |               | 49  | SNP<br>(transversion) | 100.00%        |  | 6.30E-138 |              |                          |                       |                  |  |             |  |
| Variants:<br>VaAphrodite_C_FDSW210055<br>059-1r | A           | 4023 | 4023 | 1 | T -> A                   |               | 47  | SNP<br>(transversion) | 78.70%         |  | 2.00E-109 |              |                          |                       |                  |  |             |  |
| Variants:<br>VaAphrodite_C_FDSW210055<br>059-1r | T           | 4025 | 4025 | 1 | C -> T                   |               | 42  | SNP<br>(transition)   | 100.00%        |  | 2.50E-118 |              |                          |                       |                  |  |             |  |
| Variants:<br>VaAphrodite_C_FDSW210055<br>059-1r | T           | 4027 | 4027 | 1 | A -> T                   |               | 38  | SNP<br>(transversion) | 100.00%        |  | 4.00E-107 |              |                          |                       |                  |  |             |  |
| Variants:<br>VaAphrodite_C_FDSW210055<br>059-1r | TTG         | 4031 | 4033 | 3 | CCA -> TTG               | 27 -><br>30   |     | Substitution          | 100.00%        |  | 6.30E-71  |              |                          |                       |                  |  |             |  |
| Variants:<br>VaAphrodite_C_FDSW210055<br>059-1r | T           | 4035 | 4035 | 1 | C -> T                   |               | 24  | SNP<br>(transition)   | 75.00%         |  | 2.10E-42  |              |                          |                       |                  |  |             |  |
| Variants:<br>VaAphrodite_C_FDSW210055<br>059-1r | T           | 4036 | 4036 | 1 | G -> T                   |               | 22  | SNP<br>(transversion) | 100.00%        |  | 2.50E-51  |              |                          |                       |                  |  |             |  |
| Variants:<br>VaAphrodite_C_FDSW210055<br>059-1r | T           | 4037 | 4037 | 1 | G -> T                   |               | 22  | SNP<br>(transversion) | 77.30%         |  | 1.60E-40  |              |                          |                       |                  |  |             |  |
| Variants: VaAphrodite_C_FDSW210055059-1r        |             | 4038 | 4038 | 1 | -C                       |               | 20  | Deletion              | 100.00%        |  | 1.00E-22  |              |                          |                       |                  |  |             |  |
| Variants:<br>VaAphrodite_C_FDSW210055<br>059-1r | A           | 4040 | 4040 | 1 | T -> A                   |               | 19  | SNP<br>(transversion) | 100.00%        |  | 2.00E-44  |              |                          |                       |                  |  |             |  |
| Variants:<br>VaAphrodite_C_FDSW210055<br>059-1r | GTTTAA      | 4043 | 4048 | 6 | ACCGTT -> GTTTAA         | 13 -><br>16   |     | Substitution          | 100.00%        |  | 2.00E-25  |              |                          |                       |                  |  |             |  |
| Variants:<br>VaAphrodite_C_FDSW210055<br>059-1r | GTGGTA      | 4050 | 4055 | 6 | CGCTGC -> GTGGTA         | 6 -><br>11    |     | Substitution          | 100.00%        |  | 1.60E-14  |              |                          |                       |                  |  |             |  |
| Variants:<br>VaAphrodite_C_FDSW210055<br>059-1r | AG          | 4339 | 4340 | 2 | TT -> AG                 | 25 -><br>26   |     | Substitution          | 100.00%        |  | 1.00E-45  | K -> L       | hypothetical protein CDS | hypothetica l protein | Substituti on    |  | KLI69 882.1 |  |
| Variants:<br>VaAphrodite_C_FDSW210055<br>059-1r | TGGTTCAT GA | 4378 | 4387 | 9 | GCTTGGTGCT -> TGGTTCATGA | 335 -><br>431 |     | Substitution          | 98.6% -> 99.1% |  | 0         | EHQA -> VMNH | hypothetical protein CDS | hypothetica l protein | Substituti on    |  | KLI69 882.1 |  |
| Variants:<br>VaAphrodite_C_FDSW210055<br>059-1r | T           | 4389 | 4389 | 1 | A -> T                   |               | 441 | SNP<br>(transversion) | 99.80%         |  | 0         |              | hypothetical protein CDS | hypothetica l protein | None             |  | KLI69 882.1 |  |
| Variants:<br>VaAphrodite_C_FDSW210055<br>059-1r | G           | 4392 | 4392 | 1 | C -> G                   |               | 468 | SNP<br>(transversion) | 99.60%         |  | 0         |              | hypothetical protein CDS | hypothetica l protein | None             |  | KLI69 882.1 |  |
| Variants:<br>VaAphrodite_C_FDSW210055<br>059-1r | G           | 4395 | 4395 | 1 | A -> G                   |               | 485 | SNP<br>(transition)   | 100.00%        |  | 0         |              | hypothetical protein CDS | hypothetica l protein | None             |  | KLI69 882.1 |  |
| Variants:<br>VaAphrodite_C_FDSW210055<br>059-1r | GTCGTA      | 4398 | 4403 | 6 | CGTCAC -> GTCGTA         | 512 -><br>560 |     | Substitution          | 98.7% -> 98.8% |  | 0         | MT -> YD     | hypothetical protein CDS | hypothetica l protein | Start Codon Loss |  | KLI69 882.1 |  |



|                                                 |      |      |      |   |              |               |                       |                   |          |           |
|-------------------------------------------------|------|------|------|---|--------------|---------------|-----------------------|-------------------|----------|-----------|
| Variants:<br>VaAphrodite_C_FDSW210055<br>059-1r | ACA  | 4404 | 4406 | 3 | GTT -> ACA   | 565 -><br>583 | Substitution          | 99.10%            |          | 0         |
| Variants:<br>VaAphrodite_C_FDSW210055<br>059-1r | GT   | 4409 | 4410 | 2 | TC -> GT     | 609 -><br>618 | Substitution          | 99.3% -><br>99.4% |          | 0         |
| Variants:<br>VaAphrodite_C_FDSW210055<br>059-1r | GC   | 4414 | 4415 | 2 | CT -> GC     | 639 -><br>655 | Substitution          | 99.80%            |          | 0         |
| Variants:<br>VaAphrodite_C_FDSW210055<br>059-1r | A    | 4417 | 4417 | 1 | G -> A       | 670           | SNP<br>(transition)   | 99.70%            |          | 0         |
| Variants:<br>VaAphrodite_C_FDSW210055<br>059-1r | GG   | 4419 | 4420 | 2 | CA -> GG     | 688 -><br>695 | Substitution          | 100.00%           |          | 0         |
| Variants:<br>VaAphrodite_C_FDSW210055<br>059-1r | AC   | 4423 | 4424 | 2 | GA -> AC     | 722 -><br>725 | Substitution          | 98.80%            |          | 0         |
| Variants:<br>VaAphrodite_C_FDSW210055<br>059-1r | G    | 4427 | 4426 | 0 | #NAME?       | 744           | Insertion             | 100.00%           |          | 0         |
| Variants:<br>VaAphrodite_C_FDSW210055<br>059-1r | TG   | 4431 | 4432 | 2 | GA -> TG     | 788 -><br>802 | Substitution          | 99.50%            |          | 0         |
| Variants:<br>VaAphrodite_C_FDSW210055<br>059-1r | A    | 4434 | 4433 | 0 | #NAME?       | 828           | Insertion             | 99.90%            |          | 0         |
| Variants:<br>VaAphrodite_C_FDSW210055<br>059-1r | CA   | 4435 | 4436 | 2 | GT -> CA     | 856 -><br>873 | Substitution          | 99.5% -><br>99.6% |          | 0         |
| Variants:<br>VaAphrodite_C_FDSW210055<br>059-1r | A    | 4973 | 4973 | 1 | G -> A       | 200           | SNP<br>(transition)   | 71.50%            |          | 0         |
| Variants:<br>VaAphrodite_C_FDSW210055<br>059-1r | C    | 4975 | 4975 | 1 | T -> C       | 192           | SNP<br>(transition)   | 80.20%            |          | 0         |
| Variants:<br>VaAphrodite_C_FDSW210055<br>059-1r | G    | 4976 | 4976 | 1 | T -> G       | 188           | SNP<br>(transversion) | 70.20%            |          | 0         |
| Variants:<br>VaAphrodite_C_FDSW210055<br>059-1r | AGA  | 4979 | 4981 | 3 | GAG -> AGA   | 162 -><br>173 | Substitution          | 65.4% -><br>67.6% | 1.2E-320 |           |
| Variants:<br>VaAphrodite_C_FDSW210055<br>059-1r | A    | 4982 | 4982 | 1 | T -> A       | 156           | SNP<br>(transversion) | 28.80%            |          | 1.10E-109 |
| Variants:<br>VaAphrodite_C_FDSW210055<br>059-1r | A    | 4983 | 4983 | 1 | G -> A       | 148           | SNP<br>(transition)   | 85.80%            |          | 0         |
| Variants:<br>VaAphrodite_C_FDSW210055<br>059-1r | A    | 4985 | 4985 | 1 | T -> A       | 144           | SNP<br>(transversion) | 73.60%            |          | 8.90E-284 |
| Variants:<br>VaAphrodite_C_FDSW210055<br>059-1r | A    | 4986 | 4986 | 1 | T -> A       | 140           | SNP<br>(transversion) | 26.40%            |          | 3.70E-85  |
| Variants:<br>VaAphrodite_C_FDSW210055<br>059-1r | C    | 4986 | 4986 | 1 | T -> C       | 140           | SNP<br>(transition)   | 64.30%            |          | 2.90E-259 |
| Variants:<br>VaAphrodite_C_FDSW210055<br>059-1r | A    | 4987 | 4987 | 1 | C -> A       | 140           | SNP<br>(transversion) | 64.30%            |          | 2.90E-259 |
| Variants:<br>VaAphrodite_C_FDSW210055<br>059-1r | C    | 4988 | 4988 | 1 | G -> C       | 139           | SNP<br>(transversion) | 79.10%            | 6.9E-323 |           |
| Variants:<br>VaAphrodite_C_FDSW210055<br>059-1r | AAAA | 4992 | 4995 | 4 | CGCG -> AAAA | 107 -><br>124 | Substitution          | 72.9% -><br>80.6% |          | 1.90E-211 |

|                                                 |       |      |      |   |                |              |                       |                   |  |           |
|-------------------------------------------------|-------|------|------|---|----------------|--------------|-----------------------|-------------------|--|-----------|
| Variants:<br>VaAphrodite_C_FDSW210055<br>059-1r | CACAT | 4996 | 5000 | 5 | TGGCA -> CACAT | 88 -><br>104 |                       |                   |  |           |
| Variants:<br>VaAphrodite_C_FDSW210055<br>059-1r | CA    | 5002 | 5003 | 2 | TT -> CA       | 78 -><br>83  | Substitution          | 51.1% -><br>59.6% |  | 1.50E-122 |
| Variants:<br>VaAphrodite_C_FDSW210055<br>059-1r | A     | 5004 | 5004 | 1 | T -> A         | 74           | SNP<br>(transversion) | 60.80%            |  | 2.90E-97  |
| Variants:<br>VaAphrodite_C_FDSW210055<br>059-1r | GTG   | 5005 | 5007 | 3 | TAC -> GTG     | 62 -><br>71  | Substitution          | 33.9% -><br>40.8% |  | 2.70E-43  |
| Variants:<br>VaAphrodite_C_FDSW210055<br>059-1r | TC    | 5009 | 5010 | 2 | AT -> TC       | 60           | Substitution          | 25.0% -><br>26.7% |  | 1.50E-27  |
| Variants:<br>VaAphrodite_C_FDSW210055<br>059-1r | T     | 5011 | 5011 | 1 | G -> T         | 56           | SNP<br>(transversion) | 26.80%            |  | 4.60E-25  |
| Variants:<br>VaAphrodite_C_FDSW210055<br>059-1r | C     | 5579 | 5579 | 1 | G -> C         | 66           | SNP<br>(transversion) | 100.00%           |  | 6.30E-212 |
| Variants:<br>VaAphrodite_C_FDSW210055<br>059-1r | T     | 5581 | 5581 | 1 | A -> T         | 65           | SNP<br>(transversion) | 100.00%           |  | 1.00E-208 |
| Variants:<br>VaAphrodite_C_FDSW210055<br>059-1r | CG    | 5583 | 5584 | 2 | TA -> CG       | 62 -><br>64  | Substitution          | 98.40%            |  | 4.00E-199 |
| Variants:<br>VaAphrodite_C_FDSW210055<br>059-1r | C     | 5607 | 5607 | 1 | A -> C         | 49           | SNP<br>(transversion) | 30.60%            |  | 4.80E-32  |
| Variants:<br>VaAphrodite_C_FDSW210055<br>059-1r | TT    | 5609 | 5610 | 2 | AA -> TT       | 56 -><br>59  | Substitution          | 41.1% -><br>45.8% |  | 1.50E-56  |
| Variants:<br>VaAphrodite_C_FDSW210055<br>059-1r | AA    | 5612 | 5613 | 2 | GC -> AA       | 57 -><br>60  | Substitution          | 50.9% -><br>53.3% |  | 7.10E-63  |
| Variants:<br>VaAphrodite_C_FDSW210055<br>059-1r | GGG   | 5615 | 5617 | 3 | TTA -> GGG     | 61 -><br>65  | Substitution          | 50.8% -><br>56.9% |  | 8.20E-70  |
| Variants:<br>VaAphrodite_C_FDSW210055<br>059-1r | A     | 5618 | 5618 | 1 | G -> A         | 64           | SNP<br>(transition)   | 65.60%            |  | 1.20E-105 |
| Variants:<br>VaAphrodite_C_FDSW210055<br>059-1r | T     | 5618 | 5618 | 1 | G -> T         | 64           | SNP<br>(transversion) | 34.40%            |  | 7.70E-50  |
| Variants:<br>VaAphrodite_C_FDSW210055<br>059-1r | GT    | 5619 | 5620 | 2 | TC -> GT       | 64           | Substitution          | 98.40%            |  | 1.60E-173 |
| Variants:<br>VaAphrodite_C_FDSW210055<br>059-1r | C     | 5621 | 5621 | 1 | G -> C         | 64           | SNP<br>(transversion) | 64.10%            |  | 1.80E-102 |
| Variants:<br>VaAphrodite_C_FDSW210055<br>059-1r | T     | 5622 | 5622 | 1 | C -> T         | 64           | SNP<br>(transition)   | 100.00%           |  | 4.00E-167 |
| Variants:<br>VaAphrodite_C_FDSW210055<br>059-1r | G     | 5623 | 5623 | 1 | C -> G         | 68           | SNP<br>(transversion) | 70.60%            |  | 3.20E-118 |
| Variants:<br>VaAphrodite_C_FDSW210055<br>059-1r | AA    | 5624 | 5625 | 2 | TT -> AA       | 65 -><br>68  | Substitution          | 95.6% -><br>96.9% |  | 5.00E-165 |
| Variants:<br>VaAphrodite_C_FDSW210055<br>059-1r | A     | 5626 | 5626 | 1 | G -> A         | 73           | SNP<br>(transition)   | 74.00%            |  | 6.00E-124 |
| Variants:<br>VaAphrodite_C_FDSW210055<br>059-1r | T     | 5632 | 5632 | 1 | A -> T         | 84           | SNP<br>(transversion) | 94.00%            |  | 7.60E-183 |

|                                                                                                                                                                                                          |      |      |      |   |              |               |                                             |                   |           |
|----------------------------------------------------------------------------------------------------------------------------------------------------------------------------------------------------------|------|------|------|---|--------------|---------------|---------------------------------------------|-------------------|-----------|
| Variants:<br>VaAphrodite_C_FDSW210055<br>059-1r<br>Variants:<br>VaAphrodite_C_FDSW210055<br>059-1r<br>Variants:<br>VaAphrodite_C_FDSW210055<br>059-1r<br>Variants:<br>VaAphrodite_C_FDSW210055<br>059-1r | TATG | 5633 | 5636 | 4 | ATCA -> TATG | 85 -><br>86   | Substitution                                | 73.3% -><br>77.6% | 3.90E-134 |
| Variants:<br>VaAphrodite_C_FDSW210055<br>059-1r<br>Variants:<br>VaAphrodite_C_FDSW210055<br>059-1r<br>Variants:<br>VaAphrodite_C_FDSW210055<br>059-1r                                                    | A    | 5637 | 5637 | 1 | T -> A       | 84            | SNP<br>(transversion)                       | 94.00%            | 9.60E-191 |
| Variants:<br>VaAphrodite_C_FDSW210055<br>059-1r<br>Variants:<br>VaAphrodite_C_FDSW210055<br>059-1r                                                                                                       | A    | 5638 | 5638 | 1 | T -> A       | 85            | SNP<br>(transversion)                       | 78.80%            | 3.60E-150 |
| Variants:<br>VaAphrodite_C_FDSW210055<br>059-1r<br>Variants:<br>VaAphrodite_C_FDSW210055<br>059-1r                                                                                                       | AG   | 5645 | 5646 | 2 | TC -> AG     | 106 -><br>112 | Substitution<br>Deletion<br>(tandem repeat) | 72.3% -><br>76.4% | 9.60E-184 |
| Variants:<br>VaAphrodite_C_FDSW210055059-1r<br>Variants:<br>VaAphrodite_C_FDSW210055<br>059-1r<br>Variants:<br>VaAphrodite_C_FDSW210055<br>059-1r<br>Variants:<br>VaAres1_A_FDSW210055060-2r             |      | 5648 | 5648 | 1 | (C)3 -> (C)2 | 130           |                                             | 61.50%            | 1.20E-61  |
| Variants:<br>VaAphrodite_C_FDSW210055<br>059-1r<br>Variants:<br>VaAphrodite_C_FDSW210055<br>059-1r<br>Variants:<br>VaAres1_A_FDSW210055060-2r                                                            | T    | 5653 | 5653 | 1 | G -> T       | 172           | SNP<br>(transversion)                       | 59.30%            | 9.80E-217 |
| Variants:<br>VaAphrodite_C_FDSW210055<br>059-1r<br>Variants:<br>VaAres1_A_FDSW210055060-2r                                                                                                               | GC   | 5658 | 5657 | 0 | #NAME?       | 201           | Insertion                                   | 49.30%            | 7.20E-209 |
| Variants:<br>VaAres1_A_FDSW210055060-2r<br>Variants:<br>VaAres1_A_FDSW210055060-2r<br>Variants:<br>VaAres1_A_FDSW210055060-2r                                                                            | TGGT | 79   | 82   | 4 | CCTG -> TGGT | 55 -><br>69   | Substitution                                | 73.9% -><br>81.8% | 1.70E-64  |
| Variants:<br>VaAres1_A_FDSW210055060-2r<br>Variants:<br>VaAres1_A_FDSW210055060-2r                                                                                                                       | G    | 84   | 84   | 1 | A -> G       | 45            | SNP<br>(transition)                         | 80.00%            | 1.80E-49  |
| Variants:<br>VaAres1_A_FDSW210055060-2r<br>Variants:<br>VaAres1_A_FDSW210055060-2r                                                                                                                       | G    | 86   | 86   | 1 | C -> G       | 44            | SNP<br>(transversion)                       | 100.00%           | 1.60E-75  |
| Variants:<br>VaAres1_A_FDSW210055060-2r<br>Variants:<br>VaAres1_A_FDSW210055060-2r                                                                                                                       | GGG  | 87   | 89   | 3 | ATC -> GGG   | 40 -><br>44   | Substitution                                | 79.5% -><br>81.0% | 4.00E-44  |
| Variants:<br>VaAres1_A_FDSW210055060-2r<br>Variants:<br>VaAres1_A_FDSW210055060-2r                                                                                                                       | C    | 91   | 91   | 1 | T -> C       | 39            | SNP<br>(transition)                         | 82.10%            | 5.30E-48  |
| Variants:<br>VaAres1_A_FDSW210055060-2r<br>Variants:<br>VaAres1_A_FDSW210055060-2r                                                                                                                       | GGA  | 93   | 95   | 3 | CAC -> GGA   | 29 -><br>31   | Substitution                                | 51.7% -><br>58.1% | 4.60E-14  |
| Variants:<br>VaAres1_A_FDSW210055060-2r<br>Variants:<br>VaAres1_A_FDSW210055060-2r                                                                                                                       | T    | 97   | 97   | 1 | A -> T       | 27            | SNP<br>(transversion)                       | 63.00%            | 4.20E-21  |
| Variants:<br>VaAres1_A_FDSW210055060-2r<br>Variants:<br>VaAres1_A_FDSW210055060-2r                                                                                                                       | C    | 102  | 102  | 1 | T -> C       | 25            | SNP<br>(transition)                         | 44.00%            | 4.80E-15  |
| Variants:<br>VaAres1_A_FDSW210055060-2r<br>Variants:<br>VaAres1_A_FDSW210055060-2r                                                                                                                       | T    | 108  | 108  | 1 | A -> T       | 47            | SNP<br>(transversion)                       | 25.50%            | 1.20E-23  |
| Variants:<br>VaAres1_A_FDSW210055060-2r<br>Variants:<br>VaAres1_A_FDSW210055060-2r                                                                                                                       | G    | 120  | 120  | 1 | A -> G       | 88            | SNP<br>(transition)                         | 26.10%            | 2.80E-17  |
| Variants:<br>VaAres1_A_FDSW210055060-2r<br>Variants:<br>VaAres1_A_FDSW210055060-2r                                                                                                                       | T    | 126  | 126  | 1 | C -> T       | 109           | SNP<br>(transition)                         | 34.90%            | 1.60E-47  |
| Variants:<br>VaAres1_A_FDSW210055060-2r<br>Variants:<br>VaAres1_A_FDSW210055060-2r                                                                                                                       | T    | 129  | 129  | 1 | C -> T       | 117           | SNP<br>(transition)                         | 65.80%            | 1.00E-138 |
| Variants:<br>VaAres1_A_FDSW210055060-2r<br>Variants:<br>VaAres1_A_FDSW210055060-2r                                                                                                                       | G    | 132  | 132  | 1 | C -> G       | 130           | SNP<br>(transversion)                       | 37.70%            | 6.00E-92  |
| Variants:<br>VaAres1_A_FDSW210055060-2r<br>Variants:<br>VaAres1_A_FDSW210055060-2r                                                                                                                       | T    | 144  | 144  | 1 | C -> T       | 177           | SNP<br>(transition)                         | 33.30%            | 8.50E-95  |
| Variants:<br>VaAres1_A_FDSW210055060-2r                                                                                                                                                                  | G    | 150  | 150  | 1 | C -> G       | 201           | SNP<br>(transversion)                       | 26.40%            | 4.60E-100 |

|     |     |        |           |
|-----|-----|--------|-----------|
| SNP | 217 | 27.60% | 1.60E-108 |
| SNP | 246 | 69.90% | 0         |
| SNP | 260 | 35.40% | 1.00E-149 |
| SNP | 324 | 29.90% | 5.70E-159 |
| SNP | 353 | 38.20% | 1.1E-318  |
| SNP | 383 | 26.10% | 7.40E-167 |
| SNP | 428 | 30.10% | 2.40E-288 |
| SNP | 450 | 25.30% | 6.50E-211 |
| SNP | 450 | 36.70% | 1.40E-286 |
| SNP | 455 | 29.20% | 1.1E-321  |
| SNP | 484 | 25.80% | 2.60E-170 |
| SNP | 490 | 28.40% | 0         |
| SNP | 488 | 34.60% | 2.30E-288 |
| SNP | 490 | 46.90% | 0         |
| SNP | 493 | 26.40% | 7.50E-243 |
| SNP | 491 | 26.10% | 1.10E-225 |
| SNP | 586 | 48.00% | 0         |
| SNP | 603 | 50.70% | 0         |
| SNP | 613 | 82.70% | 0         |
| SNP | 625 | 52.80% | 0         |
| SNP | 690 | 56.20% | 0         |
| SNP | 700 | 25.10% | 4.9E-324  |

|                            |   |     |     |   |        |     |                    |        |   |
|----------------------------|---|-----|-----|---|--------|-----|--------------------|--------|---|
| Variants:                  |   |     |     |   |        |     |                    |        |   |
| VaAres1_A_FDSW210055060-2r | C | 393 | 393 | 1 | G -> C | 700 | SNP (transversion) | 48.40% | 0 |
| Variants:                  |   |     |     |   |        |     |                    |        |   |
| VaAres1_A_FDSW210055060-2r | C | 396 | 396 | 1 | A -> C | 712 | SNP (transversion) | 32.90% | 0 |
| Variants:                  |   |     |     |   |        |     |                    |        |   |
| VaAres1_A_FDSW210055060-2r | G | 420 | 420 | 1 | A -> G | 778 | SNP (transition)   | 29.90% | 0 |
| Variants:                  |   |     |     |   |        |     |                    |        |   |
| VaAres1_A_FDSW210055060-2r | T | 420 | 420 | 1 | A -> T | 778 | SNP (transversion) | 35.60% | 0 |
| Variants:                  |   |     |     |   |        |     |                    |        |   |
| VaAres1_A_FDSW210055060-2r | A | 422 | 422 | 1 | T -> A | 775 | SNP (transversion) | 35.20% | 0 |
| Variants:                  |   |     |     |   |        |     |                    |        |   |
| VaAres1_A_FDSW210055060-2r | A | 423 | 423 | 1 | G -> A | 779 | SNP (transition)   | 64.60% | 0 |
| Variants:                  |   |     |     |   |        |     |                    |        |   |
| VaAres1_A_FDSW210055060-2r | A | 426 | 426 | 1 | G -> A | 783 | SNP (transition)   | 63.60% | 0 |
| Variants:                  |   |     |     |   |        |     |                    |        |   |
| VaAres1_A_FDSW210055060-2r | G | 438 | 438 | 1 | A -> G | 827 | SNP (transition)   | 50.80% | 0 |
| Variants:                  |   |     |     |   |        |     |                    |        |   |
| VaAres1_A_FDSW210055060-2r | A | 456 | 456 | 1 | G -> A | 851 | SNP (transition)   | 48.60% | 0 |
| Variants:                  |   |     |     |   |        |     |                    |        |   |
| VaAres1_A_FDSW210055060-2r | G | 469 | 469 | 1 | C -> G | 851 | SNP (transversion) | 26.30% | 0 |
| Variants:                  |   |     |     |   |        |     |                    |        |   |
| VaAres1_A_FDSW210055060-2r | C | 489 | 489 | 1 | T -> C | 865 | SNP (transition)   | 42.70% | 0 |
| Variants:                  |   |     |     |   |        |     |                    |        |   |
| VaAres1_A_FDSW210055060-2r | C | 498 | 498 | 1 | G -> C | 848 | SNP (transversion) | 26.80% | 0 |
| Variants:                  |   |     |     |   |        |     |                    |        |   |
| VaAres1_A_FDSW210055060-2r | C | 513 | 513 | 1 | T -> C | 830 | SNP (transition)   | 51.80% | 0 |
| Variants:                  |   |     |     |   |        |     |                    |        |   |
| VaAres1_A_FDSW210055060-2r | C | 516 | 516 | 1 | T -> C | 831 | SNP (transition)   | 36.50% | 0 |
| Variants:                  |   |     |     |   |        |     |                    |        |   |
| VaAres1_A_FDSW210055060-2r | T | 531 | 531 | 1 | C -> T | 834 | SNP (transition)   | 28.50% | 0 |
| Variants:                  |   |     |     |   |        |     |                    |        |   |
| VaAres1_A_FDSW210055060-2r | C | 537 | 537 | 1 | G -> C | 816 | SNP (transversion) | 59.20% | 0 |
| Variants:                  |   |     |     |   |        |     |                    |        |   |
| VaAres1_A_FDSW210055060-2r | G | 540 | 540 | 1 | A -> G | 813 | SNP (transition)   | 39.40% | 0 |
| Variants:                  |   |     |     |   |        |     |                    |        |   |
| VaAres1_A_FDSW210055060-2r | A | 552 | 552 | 1 | T -> A | 786 | SNP (transversion) | 33.30% | 0 |
| Variants:                  |   |     |     |   |        |     |                    |        |   |
| VaAres1_A_FDSW210055060-2r | A | 564 | 564 | 1 | C -> A | 779 | SNP (transversion) | 29.10% | 0 |
| Variants:                  |   |     |     |   |        |     |                    |        |   |
| VaAres1_A_FDSW210055060-2r | G | 588 | 588 | 1 | A -> G | 707 | SNP (transition)   | 34.50% | 0 |
| Variants:                  |   |     |     |   |        |     |                    |        |   |
| VaAres1_A_FDSW210055060-2r | C | 663 | 663 | 1 | T -> C | 379 | SNP (transition)   | 68.10% | 0 |
| Variants:                  |   |     |     |   |        |     |                    |        |   |
| VaAres1_A_FDSW210055060-2r | G | 677 | 677 | 1 | A -> G | 286 | SNP (transition)   | 69.20% | 0 |

134

|                                          |      |      |      |   |              |            |                    |                |           |          |                          |                      |              |            |
|------------------------------------------|------|------|------|---|--------------|------------|--------------------|----------------|-----------|----------|--------------------------|----------------------|--------------|------------|
| Variables:<br>VaAres1_A_FDSW210055060-2r | C    | 900  | 900  | 1 | G -> C       | 435        | SNP (transversion) | 59.10%         | 0         | D -> H   | hypothetical protein CDS | hypothetical protein | Substitution | KLI69879.1 |
| Variables:<br>VaAres1_A_FDSW210055060-2r | C    | 942  | 942  | 1 | G -> C       | 445        | SNP (transversion) | 28.80%         | 6.90E-194 | G -> R   | hypothetical protein CDS | hypothetical protein | Substitution | KLI69879.1 |
| Variables:<br>VaAres1_A_FDSW210055060-2r | TGT  | 966  | 968  | 2 | AGC -> TGT   | 404 -> 407 | Substitution       | 44.8% -> 45.2% | 4.20E-304 | S -> C   | hypothetical protein CDS | hypothetical protein | Substitution | KLI69879.1 |
| Variables:<br>VaAres1_A_FDSW210055060-2r | G    | 969  | 969  | 1 | C -> G       | 406        | SNP (transversion) | 26.60%         | 2.40E-138 | P -> A   | hypothetical protein CDS | hypothetical protein | Substitution | KLI69879.1 |
| Variables:<br>VaAres1_A_FDSW210055060-2r | A    | 976  | 976  | 1 | T -> A       | 421        | SNP (transversion) | 27.30%         | 3.40E-126 | V -> E   | hypothetical protein CDS | hypothetical protein | Substitution | KLI69879.1 |
| Variables:<br>VaAres1_A_FDSW210055060-2r | A    | 1008 | 1008 | 1 | G -> A       | 416        | SNP (transition)   | 30.80%         | 2.30E-135 | V -> I   | hypothetical protein CDS | hypothetical protein | Substitution | KLI69879.1 |
| Variables:<br>VaAres1_A_FDSW210055060-2r | C    | 1035 | 1035 | 1 | G -> C       | 437        | SNP (transversion) | 25.40%         | 1.70E-161 | G -> R   | hypothetical protein CDS | hypothetical protein | Substitution | KLI69879.1 |
| Variables:<br>VaAres1_A_FDSW210055060-2r | A    | 1041 | 1041 | 1 | G -> A       | 442        | SNP (transition)   | 31.00%         | 4.90E-199 | A -> T   | hypothetical protein CDS | hypothetical protein | Substitution | KLI69879.1 |
| Variables:<br>VaAres1_A_FDSW210055060-2r | G    | 1083 | 1083 | 1 | A -> G       | 451        | SNP (transition)   | 31.90%         | 0         | K -> E   | hypothetical protein CDS | hypothetical protein | Substitution | KLI69879.1 |
| Variables:<br>VaAres1_A_FDSW210055060-2r | A    | 1100 | 1100 | 1 | G -> A       | 435        | SNP (transition)   | 30.80%         | 3.30E-274 |          | hypothetical protein CDS | hypothetical protein | None         | KLI69879.1 |
| Variables:<br>VaAres1_A_FDSW210055060-2r | A    | 1101 | 1101 | 1 | G -> A       | 443        | SNP (transition)   | 26.90%         | 2.80E-247 |          |                          |                      |              |            |
| Variables:<br>VaAres1_A_FDSW210055060-2r | C    | 1104 | 1104 | 1 | G -> C       | 446        | SNP (transversion) | 29.60%         | 6.10E-307 |          |                          |                      |              |            |
| Variables:<br>VaAres1_A_FDSW210055060-2r | T    | 1116 | 1116 | 1 | C -> T       | 451        | SNP (transition)   | 29.70%         | 7.8E-312  |          | hypothetical protein CDS | hypothetical protein | None         | KLI69880.1 |
| Variables:<br>VaAres1_A_FDSW210055060-2r | T    | 1119 | 1119 | 1 | C -> T       | 454        | SNP (transition)   | 28.90%         | 0         |          | hypothetical protein CDS | hypothetical protein | None         | KLI69880.1 |
| Variables:<br>VaAres1_A_FDSW210055060-2r | G    | 1135 | 1135 | 1 | T -> G       | 453        | SNP (transversion) | 51.40%         | 0         | F -> V   | hypothetical protein CDS | hypothetical protein | Substitution | KLI69880.1 |
| Variables:<br>VaAres1_A_FDSW210055060-2r | TGTG | 1173 | 1176 | 3 | CATA -> TGTG | 421 -> 423 | Substitution       | 34.5% -> 35.0% | 0         | TI -> TV | hypothetical protein CDS | hypothetical protein | Substitution | KLI69880.1 |
| Variables:<br>VaAres1_A_FDSW210055060-2r | C    | 1182 | 1182 | 1 | T -> C       | 416        | SNP (transition)   | 35.30%         | 0         |          | hypothetical protein CDS | hypothetical protein | None         | KLI69880.1 |
| Variables:<br>VaAres1_A_FDSW210055060-2r | C    | 1200 | 1200 | 1 | T -> C       | 390        | SNP (transition)   | 29.20%         | 8.80E-299 |          | hypothetical protein CDS | hypothetical protein | None         | KLI69880.1 |
| Variables:<br>VaAres1_A_FDSW210055060-2r | G    | 1203 | 1203 | 1 | A -> G       | 389        | SNP (transition)   | 30.60%         | 1.4E-314  |          | hypothetical protein CDS | hypothetical protein | None         | KLI69880.1 |
| Variables:<br>VaAres1_A_FDSW210055060-2r | G    | 1215 | 1215 | 1 | A -> G       | 361        | SNP (transition)   | 53.70%         | 0         |          | hypothetical protein CDS | hypothetical protein | None         | KLI69880.1 |
| Variables:<br>VaAres1_A_FDSW210055060-2r | G    | 1218 | 1218 | 1 | A -> G       | 350        | SNP (transition)   | 40.90%         | 0         |          | hypothetical protein CDS | hypothetical protein | None         | KLI69880.1 |
| Variables:<br>VaAres1_A_FDSW210055060-2r | G    | 1221 | 1221 | 1 | C -> G       | 338        | SNP (transversion) | 39.30%         | 0         |          | hypothetical protein CDS | hypothetical protein | None         | KLI69880.1 |

|                                          |               |      |      |    |                                |            |                    |                 |           |                |                          |                      |              |            |
|------------------------------------------|---------------|------|------|----|--------------------------------|------------|--------------------|-----------------|-----------|----------------|--------------------------|----------------------|--------------|------------|
| Variables:<br>VaAres1_A_FDSW210055060-2r | GG            | 1232 | 1233 | 2  | AC -> GG                       | 292 -> 299 | Substitution       | 34.1% -> 34.9%  | 3.50E-257 | N -> R         | hypothetical protein CDS | hypothetical protein | Substitution | KLI69880.1 |
| Variables:<br>VaAres1_A_FDSW210055060-2r | T             | 1235 | 1235 | 1  | C -> T                         | 289        | SNP (transition)   | 35.30%          | 3.50E-257 | A -> V         | hypothetical protein CDS | hypothetical protein | Substitution | KLI69880.1 |
| Variables:<br>VaAres1_A_FDSW210055060-2r | G             | 1269 | 1269 | 1  | A -> G                         | 190        | SNP (transition)   | 54.70%          | 9.40E-299 | I -> M         | hypothetical protein CDS | hypothetical protein | Substitution | KLI69880.1 |
| Variables:<br>VaAres1_A_FDSW210055060-2r | G             | 1275 | 1275 | 1  | A -> G                         | 169        | SNP (transition)   | 56.80%          | 3.70E-278 |                | hypothetical protein CDS | hypothetical protein | None         | KLI69880.1 |
| Variables:<br>VaAres1_A_FDSW210055060-2r | T             | 1287 | 1287 | 1  | A -> T                         | 138        | SNP (transversion) | 29.00%          | 8.30E-90  |                | hypothetical protein CDS | hypothetical protein | None         | KLI69880.1 |
| Variables:<br>VaAres1_A_FDSW210055060-2r | G             | 1302 | 1302 | 1  | A -> G                         | 99         | SNP (transition)   | 43.40%          | 6.80E-123 |                | hypothetical protein CDS | hypothetical protein | None         | KLI69880.1 |
| Variables:<br>VaAres1_A_FDSW210055060-2r | G             | 1320 | 1320 | 1  | T -> G                         | 73         | SNP (transversion) | 26.00%          | 1.90E-42  |                | hypothetical protein CDS | hypothetical protein | None         | KLI69880.1 |
| Variables:<br>VaAres1_A_FDSW210055060-2r | T             | 1322 | 1322 | 1  | A -> T                         | 68         | SNP (transversion) | 25.00%          | 2.10E-34  | E -> V         | hypothetical protein CDS | hypothetical protein | Substitution | KLI69880.1 |
| Variables:<br>VaAres1_A_FDSW210055060-2r | AAGTT         | 1324 | 1328 | 4  | CACAC -> AAGTT                 | 62 -> 65   | Substitution       | 67.7% -> 71.0%  | 1.40E-138 | HT -> KF       | hypothetical protein CDS | hypothetical protein | Substitution | KLI69880.1 |
| Variables:<br>VaAres1_A_FDSW210055060-2r | AGTGCC        | 1330 | 1335 | 5  | TTAACA -> AGTGCC               | 61 -> 64   | Substitution       | 60.9% -> 70.5%  | 1.30E-119 | LT -> SA       | hypothetical protein CDS | hypothetical protein | Substitution | KLI69880.1 |
| Variables:<br>VaAres1_A_FDSW210055060-2r | TCGCT         | 1339 | 1343 | 5  | CGTTA -> TCGCT                 | 54 -> 63   | Substitution       | 32.8% -> 39.3%  | 2.40E-53  |                | hypothetical protein CDS | hypothetical protein | Extension    | KLI69880.1 |
| Variables:<br>VaAres1_A_FDSW210055060-2r | T             | 1345 | 1345 | 1  | G -> T                         | 52         | SNP (transversion) | 32.70%          | 1.40E-48  |                |                          |                      |              |            |
| Variables:<br>VaAres1_A_FDSW210055060-2r | TT            | 1347 | 1348 | 2  | AA -> TT                       | 48 -> 51   | Substitution       | 39.6% -> 45.1%  | 5.80E-58  |                |                          |                      |              |            |
| Variables:<br>VaAres1_A_FDSW210055060-2r | AA            | 1351 | 1352 | 2  | GG -> AA                       | 45 -> 47   | Substitution       | 26.7% -> 31.9%  | 4.50E-31  |                |                          |                      |              |            |
| Variables:<br>VaAres1_A_FDSW210055060-2r | T             | 2097 | 2097 | 1  | C -> T                         | 15         | SNP (transition)   | 26.70%          | 2.20E-12  |                | hypothetical protein CDS | hypothetical protein | None         | KLI69881.1 |
| Variables:<br>VaAres1_A_FDSW210055060-2r | TTTACA        | 2101 | 2106 | 6  | AAGTTT -> TTTACA               | 19 -> 21   | Substitution       | 47.6% -> 52.6%  | 9.20E-30  | KF -> FT       | hypothetical protein CDS | hypothetical protein | Substitution | KLI69881.1 |
| Variables:<br>VaAres1_A_FDSW210055060-2r | GC            | 2108 | 2109 | 2  | CA -> GC                       | 20 -> 24   | Substitution       | 55.0% -> 62.5%  | 5.30E-34  | A -> G         | hypothetical protein CDS | hypothetical protein | Substitution | KLI69881.1 |
| Variables:<br>VaAres1_A_FDSW210055060-2r | AA            | 2111 | 2112 | 2  | TC -> AA                       | 23         | Substitution       | 65.20%          | 4.90E-46  | I -> K         | hypothetical protein CDS | hypothetical protein | Substitution | KLI69881.1 |
| Variables:<br>VaAres1_A_FDSW210055060-2r | CCGAAACGGATGA | 2114 | 2126 | 12 | ATTTTGAAAAAAT -> CCGAAACGGATGA | 26 -> 34   | Substitution       | 67.9% -> 81.3%  | 8.90E-61  | DFEKI -> AETDD | hypothetical protein CDS | hypothetical protein | Substitution | KLI69881.1 |
| Variables:<br>VaAres1_A_FDSW210055060-2r | AA            | 2128 | 2129 | 2  | GC -> AA                       | 33 -> 34   | Substitution       | 88.2% -> 93.9%  | 4.70E-93  | A -> N         | hypothetical protein CDS | hypothetical protein | Substitution | KLI69881.1 |
| Variables:<br>VaAres1_A_FDSW210055060-2r | CAC           | 2131 | 2133 | 2  | TAA -> CAC                     | 33         | Substitution       | 97.0% -> 100.0% | 5.20E-108 |                | hypothetical protein CDS | hypothetical protein | Extension    | KLI69881.1 |
| Variables:<br>VaAres1_A_FDSW210055060-2r | T             | 2135 | 2135 | 1  | A -> T                         | 33         | SNP (transversion) | 100.00%         | 6.30E-113 |                |                          |                      |              |            |



|                                         |     |      |      |   |            |             |                    |                   |           |
|-----------------------------------------|-----|------|------|---|------------|-------------|--------------------|-------------------|-----------|
| Variants:<br>VaAres1_A_FDSW210055060-2r | CTG | 2137 | 2139 | 3 | AGC -> CTG | 33 -><br>34 | Substitution       | 100.00%           | 1.30E-109 |
| Variants:<br>VaAres1_A_FDSW210055060-2r | AG  | 2141 | 2142 | 2 | TT -> AG   | 35 -><br>37 | Substitution       | 97.1% -><br>97.3% | 1.00E-119 |
| Variants:<br>VaAres1_A_FDSW210055060-2r | G   | 2145 | 2145 | 1 | A -> G     | 38          | SNP (transition)   | 97.40%            | 6.00E-125 |
| Variants:<br>VaAres1_A_FDSW210055060-2r | T   | 2147 | 2147 | 1 | A -> T     | 38          | SNP (transversion) | 100.00%           | 1.00E-133 |
| Variants:<br>VaAres1_A_FDSW210055060-2r | G   | 2149 | 2148 | 0 | #NAME?     | 40          | Insertion          | 100.00%           | 1.00E-140 |
| Variants:<br>VaAres1_A_FDSW210055060-2r | GAG | 2902 | 2904 | 3 | TGA -> GAG | 11 -><br>14 | Substitution       | 72.7% -><br>84.6% | 1.60E-14  |
| Variants:<br>VaAres1_A_FDSW210055060-2r | GGA | 2906 | 2908 | 3 | TCG -> GGA | 9 -><br>10  | Substitution       | 66.7% -><br>70.0% | 5.00E-09  |
| Variants:<br>VaAres1_A_FDSW210055060-2r | G   | 2910 | 2910 | 1 | A -> G     | 8           | SNP (transition)   | 62.50%            | 5.30E-07  |
| Variants: VaAres1_A_FDSW210055060-2r    |     | 3097 | 3097 | 1 | #NAME?     | 145         | Deletion           | 44.10%            | 3.50E-68  |
| Variants:<br>VaAres1_A_FDSW210055060-2r | AG  | 3451 | 3452 | 2 | GT -> AG   | 15          | Substitution       | 26.7% -><br>33.3% | 5.30E-08  |
| Variants:<br>VaAres1_A_FDSW210055060-2r | G   | 3456 | 3456 | 1 | T -> G     | 23          | SNP (transversion) | 39.10%            | 7.20E-13  |
| Variants:<br>VaAres1_A_FDSW210055060-2r | TTT | 3458 | 3460 | 3 | AAG -> TTT | 23 -><br>27 | Substitution       | 29.6% -><br>34.8% | 1.90E-10  |
| Variants:<br>VaAres1_A_FDSW210055060-2r | T   | 3659 | 3659 | 1 | G -> T     | 140         | SNP (transversion) | 52.90%            | 2.90E-226 |
| Variants:<br>VaAres1_A_FDSW210055060-2r | C   | 3758 | 3758 | 1 | A -> C     | 159         | SNP (transversion) | 48.40%            | 6.60E-216 |
| Variants:<br>VaAres1_A_FDSW210055060-2r | G   | 3778 | 3778 | 1 | A -> G     | 163         | SNP (transition)   | 51.50%            | 6.60E-247 |
| Variants:<br>VaAres1_A_FDSW210055060-2r | T   | 3780 | 3780 | 1 | C -> T     | 163         | SNP (transition)   | 51.50%            | 6.60E-247 |
| Variants:<br>VaAres1_A_FDSW210055060-2r | C   | 3852 | 3852 | 1 | T -> C     | 178         | SNP (transition)   | 51.10%            | 6.70E-267 |
| Variants:<br>VaAres1_A_FDSW210055060-2r | G   | 3864 | 3864 | 1 | A -> G     | 167         | SNP (transition)   | 46.70%            | 1.20E-232 |
| Variants:<br>VaAres1_A_FDSW210055060-2r | T   | 3922 | 3922 | 1 | C -> T     | 143         | SNP (transition)   | 46.90%            | 4.30E-180 |
| Variants:<br>VaAres1_A_FDSW210055060-2r | T   | 4022 | 4022 | 1 | G -> T     | 30          | SNP (transversion) | 96.70%            | 7.50E-69  |
| Variants:<br>VaAres1_A_FDSW210055060-2r | A   | 4023 | 4023 | 1 | T -> A     | 29          | SNP (transversion) | 51.70%            | 7.10E-26  |
| Variants:<br>VaAres1_A_FDSW210055060-2r | G   | 4023 | 4023 | 1 | T -> G     | 29          | SNP (transversion) | 41.40%            | 4.90E-23  |

|                                          |                |      |      |   |                             |               |                       |                   |          |                 |                             |                          |                  |                |  |  |  |
|------------------------------------------|----------------|------|------|---|-----------------------------|---------------|-----------------------|-------------------|----------|-----------------|-----------------------------|--------------------------|------------------|----------------|--|--|--|
| Variables:<br>VaAres1_A_FDSW210055060-2r | T              | 4025 | 4025 | 1 | C -> T                      | 29            | SNP<br>(transition)   | 100.00%           | 2.50E-70 |                 |                             |                          |                  |                |  |  |  |
| Variables:<br>VaAres1_A_FDSW210055060-2r | T              | 4027 | 4027 | 1 | A -> T                      | 27            | SNP<br>(transversion) | 96.30%            | 4.30E-59 |                 |                             |                          |                  |                |  |  |  |
| Variables:<br>VaAres1_A_FDSW210055060-2r | C              | 4029 | 4029 | 1 | T -> C                      | 24            | SNP<br>(transition)   | 41.70%            | 1.90E-20 |                 |                             |                          |                  |                |  |  |  |
| Variables:<br>VaAres1_A_FDSW210055060-2r | TTG            | 4031 | 4033 | 3 | CCA -> TTG                  | 23 -><br>24   | Substitution          | 95.7% -><br>95.8% | 3.00E-52 |                 |                             |                          |                  |                |  |  |  |
| Variables:<br>VaAres1_A_FDSW210055060-2r | G              | 4035 | 4035 | 1 | C -> G                      | 22            | SNP<br>(transversion) | 50.00%            | 2.20E-22 |                 |                             |                          |                  |                |  |  |  |
| Variables:<br>VaAres1_A_FDSW210055060-2r | T              | 4035 | 4035 | 1 | C -> T                      | 22            | SNP<br>(transition)   | 50.00%            | 4.20E-19 |                 |                             |                          |                  |                |  |  |  |
| Variables:<br>VaAres1_A_FDSW210055060-2r | T              | 4036 | 4036 | 1 | G -> T                      | 19            | SNP<br>(transversion) | 100.00%           | 1.60E-42 |                 |                             |                          |                  |                |  |  |  |
| Variables:<br>VaAres1_A_FDSW210055060-2r | C              | 4037 | 4037 | 1 | G -> C                      | 18            | SNP<br>(transversion) | 33.30%            | 2.80E-10 |                 |                             |                          |                  |                |  |  |  |
| Variables:<br>VaAres1_A_FDSW210055060-2r | T              | 4037 | 4037 | 1 | G -> T                      | 18            | SNP<br>(transversion) | 61.10%            | 2.40E-19 |                 |                             |                          |                  |                |  |  |  |
| Variables:<br>VaAres1_A_FDSW210055060-2r | TA             | 4038 | 4039 | 2 | CT -> TA                    | 16 -><br>18   | Substitution          | 93.8% -><br>94.4% | 1.60E-29 |                 |                             |                          |                  |                |  |  |  |
| Variables:<br>VaAres1_A_FDSW210055060-2r | A              | 4040 | 4040 | 1 | T -> A                      | 16            | SNP<br>(transversion) | 43.80%            | 5.20E-10 |                 |                             |                          |                  |                |  |  |  |
| Variables:<br>VaAres1_A_FDSW210055060-2r | G              | 4040 | 4040 | 1 | T -> G                      | 16            | SNP<br>(transversion) | 50.00%            | 3.10E-14 |                 |                             |                          |                  |                |  |  |  |
| Variables:<br>VaAres1_A_FDSW210055060-2r | TGTTTAAG       | 4041 | 4048 | 8 | GTACCGTT -><br>TGTTTAAG     | 12 -><br>15   | Substitution          | 91.7% -><br>93.3% | 1.30E-23 |                 |                             |                          |                  |                |  |  |  |
| Variables:<br>VaAres1_A_FDSW210055060-2r | T              | 4050 | 4050 | 1 | C -> T                      | 8             | SNP<br>(transition)   | 100.00%           | 4.00E-19 |                 |                             |                          |                  |                |  |  |  |
| Variables:<br>VaAres1_A_FDSW210055060-2r | G              | 4052 | 4052 | 1 | C -> G                      | 6             | SNP<br>(transversion) | 100.00%           | 1.60E-14 |                 |                             |                          |                  |                |  |  |  |
| Variables:<br>VaAres1_A_FDSW210055060-2r | C              | 4053 | 4053 | 1 | T -> C                      | 6             | SNP<br>(transition)   | 66.70%            | 9.40E-09 |                 |                             |                          |                  |                |  |  |  |
| Variables:<br>VaAres1_A_FDSW210055060-2r | AT             | 4054 | 4055 | 2 | GC -> AT                    | 4 -> 6        | Substitution          | 100.00%           | 6.30E-10 |                 |                             |                          |                  |                |  |  |  |
| Variables:<br>VaAres1_A_FDSW210055060-2r | AGGTA          | 4339 | 4343 | 4 | TTATC -> AGGTA              | 10 -><br>15   | Substitution          | 100.00%           | 1.00E-14 | DK -> YL        | hypothetical<br>protein CDS | hypothetica<br>l protein | Substituti<br>on | KLI69<br>882.1 |  |  |  |
| Variables:<br>VaAres1_A_FDSW210055060-2r | TT             | 4345 | 4346 | 2 | AA -> TT                    | 24 -><br>26   | Substitution          | 95.8% -><br>96.2% | 9.40E-41 | F -> N          | hypothetical<br>protein CDS | hypothetica<br>l protein | Substituti<br>on | KLI69<br>882.1 |  |  |  |
| Variables:<br>VaAres1_A_FDSW210055060-2r | CCA            | 4370 | 4372 | 3 | GGC -> CCA                  | 167 -><br>183 | Substitution          | 99.4% -><br>99.5% | 0        | GQ -> VE        | hypothetical<br>protein CDS | hypothetica<br>l protein | Substituti<br>on | KLI69<br>882.1 |  |  |  |
| Variables:<br>VaAres1_A_FDSW210055060-2r | TT             | 4374 | 4375 | 2 | GA -> TT                    | 194 -><br>198 | Substitution          | 99.50%            | 0        | I -> K          | hypothetical<br>protein CDS | hypothetica<br>l protein | Substituti<br>on | KLI69<br>882.1 |  |  |  |
| Variables:<br>VaAres1_A_FDSW210055060-2r | TGTTTCAT<br>GA | 4378 | 4387 | 9 | GCTTGGTGCT -><br>TGTTTCATGA | 214 -><br>258 | Substitution          | 98.6% -><br>98.8% | 0        | EHQA -><br>VMNH | hypothetical<br>protein CDS | hypothetica<br>l protein | Substituti<br>on | KLI69<br>882.1 |  |  |  |

|   |   |   |   |   |   |   |   |   |    |    |    |    |    |    |    |    |    |    |    |    |    |    |    |    |    |    |    |    |    |    |    |    |    |    |    |    |    |    |    |    |    |    |    |    |    |    |    |    |    |    |    |    |    |    |    |    |    |    |    |    |    |    |    |    |    |    |    |    |    |    |    |    |    |    |    |    |    |    |    |    |    |    |    |    |    |    |    |    |    |    |    |    |    |    |    |    |    |    |     |     |     |     |     |     |     |     |     |     |     |     |     |     |     |     |     |     |     |     |     |     |     |     |     |     |     |     |     |     |     |     |     |     |     |     |     |     |     |     |     |     |     |     |     |     |     |     |     |     |     |     |     |     |     |     |     |     |     |     |     |     |     |     |     |     |     |     |     |     |     |     |     |     |     |     |     |     |     |     |     |     |     |     |     |     |     |     |     |     |     |     |     |     |     |     |     |     |     |     |     |     |     |     |     |     |     |     |     |     |     |     |     |     |     |     |     |     |     |     |     |     |     |     |     |     |     |     |     |     |     |     |     |     |     |     |     |     |     |     |     |     |     |     |     |     |     |     |     |     |     |     |     |     |     |     |     |     |     |     |     |     |     |     |     |     |     |     |     |     |     |     |     |     |     |     |     |     |     |     |     |     |     |     |     |     |     |     |     |     |     |     |     |     |     |     |     |     |     |     |     |     |     |     |     |     |     |     |     |     |     |     |     |     |     |     |     |     |     |     |     |     |     |     |     |     |     |     |     |     |     |     |     |     |     |     |     |     |     |     |     |     |     |     |     |     |     |     |     |     |     |     |     |     |     |     |     |     |     |     |     |     |     |     |     |     |     |     |     |     |     |     |     |     |     |     |     |     |     |     |     |     |     |     |     |     |     |     |     |     |     |     |     |     |     |     |     |     |     |     |     |     |     |     |     |     |     |     |     |     |     |     |     |     |     |     |     |     |     |     |     |     |     |     |     |     |     |     |     |     |     |     |     |     |     |     |     |     |     |     |     |     |     |     |     |     |     |     |     |     |     |     |     |     |     |     |     |     |     |     |     |     |     |     |     |     |     |     |     |     |     |     |     |     |     |     |     |     |     |     |     |     |     |     |     |     |     |     |     |     |     |     |     |     |     |     |     |     |     |     |     |     |     |     |     |     |     |     |     |     |     |     |     |     |     |     |     |     |     |     |     |     |     |     |     |     |
|---|---|---|---|---|---|---|---|---|----|----|----|----|----|----|----|----|----|----|----|----|----|----|----|----|----|----|----|----|----|----|----|----|----|----|----|----|----|----|----|----|----|----|----|----|----|----|----|----|----|----|----|----|----|----|----|----|----|----|----|----|----|----|----|----|----|----|----|----|----|----|----|----|----|----|----|----|----|----|----|----|----|----|----|----|----|----|----|----|----|----|----|----|----|----|----|----|----|----|-----|-----|-----|-----|-----|-----|-----|-----|-----|-----|-----|-----|-----|-----|-----|-----|-----|-----|-----|-----|-----|-----|-----|-----|-----|-----|-----|-----|-----|-----|-----|-----|-----|-----|-----|-----|-----|-----|-----|-----|-----|-----|-----|-----|-----|-----|-----|-----|-----|-----|-----|-----|-----|-----|-----|-----|-----|-----|-----|-----|-----|-----|-----|-----|-----|-----|-----|-----|-----|-----|-----|-----|-----|-----|-----|-----|-----|-----|-----|-----|-----|-----|-----|-----|-----|-----|-----|-----|-----|-----|-----|-----|-----|-----|-----|-----|-----|-----|-----|-----|-----|-----|-----|-----|-----|-----|-----|-----|-----|-----|-----|-----|-----|-----|-----|-----|-----|-----|-----|-----|-----|-----|-----|-----|-----|-----|-----|-----|-----|-----|-----|-----|-----|-----|-----|-----|-----|-----|-----|-----|-----|-----|-----|-----|-----|-----|-----|-----|-----|-----|-----|-----|-----|-----|-----|-----|-----|-----|-----|-----|-----|-----|-----|-----|-----|-----|-----|-----|-----|-----|-----|-----|-----|-----|-----|-----|-----|-----|-----|-----|-----|-----|-----|-----|-----|-----|-----|-----|-----|-----|-----|-----|-----|-----|-----|-----|-----|-----|-----|-----|-----|-----|-----|-----|-----|-----|-----|-----|-----|-----|-----|-----|-----|-----|-----|-----|-----|-----|-----|-----|-----|-----|-----|-----|-----|-----|-----|-----|-----|-----|-----|-----|-----|-----|-----|-----|-----|-----|-----|-----|-----|-----|-----|-----|-----|-----|-----|-----|-----|-----|-----|-----|-----|-----|-----|-----|-----|-----|-----|-----|-----|-----|-----|-----|-----|-----|-----|-----|-----|-----|-----|-----|-----|-----|-----|-----|-----|-----|-----|-----|-----|-----|-----|-----|-----|-----|-----|-----|-----|-----|-----|-----|-----|-----|-----|-----|-----|-----|-----|-----|-----|-----|-----|-----|-----|-----|-----|-----|-----|-----|-----|-----|-----|-----|-----|-----|-----|-----|-----|-----|-----|-----|-----|-----|-----|-----|-----|-----|-----|-----|-----|-----|-----|-----|-----|-----|-----|-----|-----|-----|-----|-----|-----|-----|-----|-----|-----|-----|-----|-----|-----|-----|-----|-----|-----|-----|-----|-----|-----|-----|-----|-----|-----|-----|-----|-----|-----|-----|-----|-----|-----|-----|-----|-----|-----|-----|-----|-----|-----|-----|-----|-----|-----|-----|-----|-----|-----|-----|-----|-----|-----|-----|-----|-----|-----|-----|-----|-----|-----|-----|-----|-----|-----|-----|-----|-----|-----|-----|-----|-----|-----|-----|-----|-----|-----|-----|-----|-----|-----|-----|-----|-----|-----|-----|-----|-----|
| 1 | 2 | 3 | 4 | 5 | 6 | 7 | 8 | 9 | 10 | 11 | 12 | 13 | 14 | 15 | 16 | 17 | 18 | 19 | 20 | 21 | 22 | 23 | 24 | 25 | 26 | 27 | 28 | 29 | 30 | 31 | 32 | 33 | 34 | 35 | 36 | 37 | 38 | 39 | 40 | 41 | 42 | 43 | 44 | 45 | 46 | 47 | 48 | 49 | 50 | 51 | 52 | 53 | 54 | 55 | 56 | 57 | 58 | 59 | 60 | 61 | 62 | 63 | 64 | 65 | 66 | 67 | 68 | 69 | 70 | 71 | 72 | 73 | 74 | 75 | 76 | 77 | 78 | 79 | 80 | 81 | 82 | 83 | 84 | 85 | 86 | 87 | 88 | 89 | 90 | 91 | 92 | 93 | 94 | 95 | 96 | 97 | 98 | 99 | 100 | 101 | 102 | 103 | 104 | 105 | 106 | 107 | 108 | 109 | 110 | 111 | 112 | 113 | 114 | 115 | 116 | 117 | 118 | 119 | 120 | 121 | 122 | 123 | 124 | 125 | 126 | 127 | 128 | 129 | 130 | 131 | 132 | 133 | 134 | 135 | 136 | 137 | 138 | 139 | 140 | 141 | 142 | 143 | 144 | 145 | 146 | 147 | 148 | 149 | 150 | 151 | 152 | 153 | 154 | 155 | 156 | 157 | 158 | 159 | 160 | 161 | 162 | 163 | 164 | 165 | 166 | 167 | 168 | 169 | 170 | 171 | 172 | 173 | 174 | 175 | 176 | 177 | 178 | 179 | 180 | 181 | 182 | 183 | 184 | 185 | 186 | 187 | 188 | 189 | 190 | 191 | 192 | 193 | 194 | 195 | 196 | 197 | 198 | 199 | 200 | 201 | 202 | 203 | 204 | 205 | 206 | 207 | 208 | 209 | 210 | 211 | 212 | 213 | 214 | 215 | 216 | 217 | 218 | 219 | 220 | 221 | 222 | 223 | 224 | 225 | 226 | 227 | 228 | 229 | 230 | 231 | 232 | 233 | 234 | 235 | 236 | 237 | 238 | 239 | 240 | 241 | 242 | 243 | 244 | 245 | 246 | 247 | 248 | 249 | 250 | 251 | 252 | 253 | 254 | 255 | 256 | 257 | 258 | 259 | 260 | 261 | 262 | 263 | 264 | 265 | 266 | 267 | 268 | 269 | 270 | 271 | 272 | 273 | 274 | 275 | 276 | 277 | 278 | 279 | 280 | 281 | 282 | 283 | 284 | 285 | 286 | 287 | 288 | 289 | 290 | 291 | 292 | 293 | 294 | 295 | 296 | 297 | 298 | 299 | 300 | 301 | 302 | 303 | 304 | 305 | 306 | 307 | 308 | 309 | 310 | 311 | 312 | 313 | 314 | 315 | 316 | 317 | 318 | 319 | 320 | 321 | 322 | 323 | 324 | 325 | 326 | 327 | 328 | 329 | 330 | 331 | 332 | 333 | 334 | 335 | 336 | 337 | 338 | 339 | 340 | 341 | 342 | 343 | 344 | 345 | 346 | 347 | 348 | 349 | 350 | 351 | 352 | 353 | 354 | 355 | 356 | 357 | 358 | 359 | 360 | 361 | 362 | 363 | 364 | 365 | 366 | 367 | 368 | 369 | 370 | 371 | 372 | 373 | 374 | 375 | 376 | 377 | 378 | 379 | 380 | 381 | 382 | 383 | 384 | 385 | 386 | 387 | 388 | 389 | 390 | 391 | 392 | 393 | 394 | 395 | 396 | 397 | 398 | 399 | 400 | 401 | 402 | 403 | 404 | 405 | 406 | 407 | 408 | 409 | 410 | 411 | 412 | 413 | 414 | 415 | 416 | 417 | 418 | 419 | 420 | 421 | 422 | 423 | 424 | 425 | 426 | 427 | 428 | 429 | 430 | 431 | 432 | 433 | 434 | 435 | 436 | 437 | 438 | 439 | 440 | 441 | 442 | 443 | 444 | 445 | 446 | 447 | 448 | 449 | 450 | 451 | 452 | 453 | 454 | 455 | 456 | 457 | 458 | 459 | 460 | 461 | 462 | 463 | 464 | 465 | 466 | 467 | 468 | 469 | 470 | 471 | 472 | 473 | 474 | 475 | 476 | 477 | 478 | 479 | 480 | 481 | 482 | 483 | 484 | 485 | 486 | 487 | 488 | 489 | 490 | 491 | 492 | 493 | 494 | 495 | 496 | 497 | 498 | 499 | 500 | 501 | 502 | 503 | 504 | 505 | 506 | 507 | 508 | 509 | 510 | 511 | 512 | 513 | 514 | 515 | 516 | 517 | 518 | 519 | 520 | 521 | 522 | 523 | 524 | 525 |
|---|---|---|---|---|---|---|---|---|----|----|----|----|----|----|----|----|----|----|----|----|----|----|----|----|----|----|----|----|----|----|----|----|----|----|----|----|----|----|----|----|----|----|----|----|----|----|----|----|----|----|----|----|----|----|----|----|----|----|----|----|----|----|----|----|----|----|----|----|----|----|----|----|----|----|----|----|----|----|----|----|----|----|----|----|----|----|----|----|----|----|----|----|----|----|----|----|----|----|-----|-----|-----|-----|-----|-----|-----|-----|-----|-----|-----|-----|-----|-----|-----|-----|-----|-----|-----|-----|-----|-----|-----|-----|-----|-----|-----|-----|-----|-----|-----|-----|-----|-----|-----|-----|-----|-----|-----|-----|-----|-----|-----|-----|-----|-----|-----|-----|-----|-----|-----|-----|-----|-----|-----|-----|-----|-----|-----|-----|-----|-----|-----|-----|-----|-----|-----|-----|-----|-----|-----|-----|-----|-----|-----|-----|-----|-----|-----|-----|-----|-----|-----|-----|-----|-----|-----|-----|-----|-----|-----|-----|-----|-----|-----|-----|-----|-----|-----|-----|-----|-----|-----|-----|-----|-----|-----|-----|-----|-----|-----|-----|-----|-----|-----|-----|-----|-----|-----|-----|-----|-----|-----|-----|-----|-----|-----|-----|-----|-----|-----|-----|-----|-----|-----|-----|-----|-----|-----|-----|-----|-----|-----|-----|-----|-----|-----|-----|-----|-----|-----|-----|-----|-----|-----|-----|-----|-----|-----|-----|-----|-----|-----|-----|-----|-----|-----|-----|-----|-----|-----|-----|-----|-----|-----|-----|-----|-----|-----|-----|-----|-----|-----|-----|-----|-----|-----|-----|-----|-----|-----|-----|-----|-----|-----|-----|-----|-----|-----|-----|-----|-----|-----|-----|-----|-----|-----|-----|-----|-----|-----|-----|-----|-----|-----|-----|-----|-----|-----|-----|-----|-----|-----|-----|-----|-----|-----|-----|-----|-----|-----|-----|-----|-----|-----|-----|-----|-----|-----|-----|-----|-----|-----|-----|-----|-----|-----|-----|-----|-----|-----|-----|-----|-----|-----|-----|-----|-----|-----|-----|-----|-----|-----|-----|-----|-----|-----|-----|-----|-----|-----|-----|-----|-----|-----|-----|-----|-----|-----|-----|-----|-----|-----|-----|-----|-----|-----|-----|-----|-----|-----|-----|-----|-----|-----|-----|-----|-----|-----|-----|-----|-----|-----|-----|-----|-----|-----|-----|-----|-----|-----|-----|-----|-----|-----|-----|-----|-----|-----|-----|-----|-----|-----|-----|-----|-----|-----|-----|-----|-----|-----|-----|-----|-----|-----|-----|-----|-----|-----|-----|-----|-----|-----|-----|-----|-----|-----|-----|-----|-----|-----|-----|-----|-----|-----|-----|-----|-----|-----|-----|-----|-----|-----|-----|-----|-----|-----|-----|-----|-----|-----|-----|-----|-----|-----|-----|-----|-----|-----|-----|-----|-----|-----|-----|-----|-----|-----|-----|-----|-----|-----|-----|-----|-----|-----|-----|-----|-----|-----|-----|-----|-----|-----|-----|-----|-----|-----|-----|-----|-----|-----|-----|-----|-----|-----|-----|-----|-----|-----|-----|-----|-----|-----|-----|-----|-----|

|                                         |     |      |      |   |            |          |                    |                |           |
|-----------------------------------------|-----|------|------|---|------------|----------|--------------------|----------------|-----------|
| Variants:<br>VaAres1_A_FDSW210055060-2r | A   | 4981 | 4981 | 1 | G -> A     | 80       | SNP (transition)   | 68.80%         | 1.10E-161 |
| Variants:<br>VaAres1_A_FDSW210055060-2r | A   | 4982 | 4982 | 1 | T -> A     | 79       | SNP (transversion) | 78.50%         | 2.00E-188 |
| Variants:<br>VaAres1_A_FDSW210055060-2r | A   | 4983 | 4983 | 1 | G -> A     | 76       | SNP (transition)   | 90.80%         | 3.40E-212 |
| Variants:<br>VaAres1_A_FDSW210055060-2r | C   | 4984 | 4984 | 1 | A -> C     | 76       | SNP (transversion) | 51.30%         | 2.10E-115 |
| Variants:<br>VaAres1_A_FDSW210055060-2r | A   | 4985 | 4985 | 1 | T -> A     | 75       | SNP (transversion) | 72.00%         | 1.30E-160 |
| Variants:<br>VaAres1_A_FDSW210055060-2r | A   | 4986 | 4986 | 1 | T -> A     | 75       | SNP (transversion) | 26.70%         | 7.50E-41  |
| Variants:<br>VaAres1_A_FDSW210055060-2r | C   | 4986 | 4986 | 1 | T -> C     | 75       | SNP (transition)   | 66.70%         | 5.20E-151 |
| Variants:<br>VaAres1_A_FDSW210055060-2r | A   | 4988 | 4988 | 1 | G -> A     | 65       | SNP (transition)   | 56.90%         | 6.20E-112 |
| Variants:<br>VaAres1_A_FDSW210055060-2r | C   | 4988 | 4988 | 1 | G -> C     | 65       | SNP (transversion) | 33.80%         | 1.20E-49  |
| Variants:<br>VaAres1_A_FDSW210055060-2r | A   | 4989 | 4989 | 1 | C -> A     | 62       | SNP (transversion) | 67.70%         | 2.30E-123 |
| Variants:<br>VaAres1_A_FDSW210055060-2r | AA  | 4992 | 4993 | 2 | CG -> AA   | 57 -> 58 | Substitution       | 89.5% -> 89.7% | 2.30E-156 |
| Variants:<br>VaAres1_A_FDSW210055060-2r | A   | 4994 | 4994 | 1 | C -> A     | 55       | SNP (transversion) | 38.20%         | 1.00E-46  |
| Variants:<br>VaAres1_A_FDSW210055060-2r | ACA | 4995 | 4997 | 3 | GTG -> ACA | 45 -> 52 | Substitution       | 55.6% -> 61.5% | 1.00E-75  |
| Variants:<br>VaAres1_A_FDSW210055060-2r | A   | 4998 | 4998 | 1 | G -> A     | 43       | SNP (transition)   | 25.60%         | 1.30E-19  |
| Variants:<br>VaAres1_A_FDSW210055060-2r | T   | 4998 | 4998 | 1 | G -> T     | 43       | SNP (transversion) | 37.20%         | 1.60E-40  |
| Variants:<br>VaAres1_A_FDSW210055060-2r | T   | 4999 | 4999 | 1 | C -> T     | 43       | SNP (transition)   | 55.80%         | 7.90E-61  |
| Variants:<br>VaAres1_A_FDSW210055060-2r | C   | 5000 | 5000 | 1 | A -> C     | 43       | SNP (transversion) | 37.20%         | 2.60E-45  |
| Variants:<br>VaAres1_A_FDSW210055060-2r | T   | 5000 | 5000 | 1 | A -> T     | 43       | SNP (transversion) | 34.90%         | 4.60E-33  |
| Variants:<br>VaAres1_A_FDSW210055060-2r | A   | 5001 | 5001 | 1 | T -> A     | 45       | SNP (transversion) | 35.60%         | 2.50E-35  |
| Variants:<br>VaAres1_A_FDSW210055060-2r | A   | 5002 | 5002 | 1 | T -> A     | 43       | SNP (transversion) | 51.20%         | 2.60E-50  |
| Variants:<br>VaAres1_A_FDSW210055060-2r | A   | 5003 | 5003 | 1 | T -> A     | 42       | SNP (transversion) | 35.70%         | 9.30E-29  |
| Variants:<br>VaAres1_A_FDSW210055060-2r | G   | 5003 | 5003 | 1 | T -> G     | 42       | SNP (transversion) | 26.20%         | 2.10E-27  |

|                                         |       |      |      |   |                |          |                    |                |          |
|-----------------------------------------|-------|------|------|---|----------------|----------|--------------------|----------------|----------|
| Variants:<br>VaAres1_A_FDSW210055060-2r | G     | 5005 | 5005 | 1 | T -> G         | 38       | SNP (transversion) | 36.80%         | 9.60E-40 |
| Variants:<br>VaAres1_A_FDSW210055060-2r | G     | 5006 | 5006 | 1 | A -> G         | 32       | SNP (transition)   | 28.10%         | 1.30E-17 |
| Variants:<br>VaAres1_A_FDSW210055060-2r | T     | 5006 | 5006 | 1 | A -> T         | 32       | SNP (transversion) | 31.30%         | 6.40E-27 |
| Variants:<br>VaAres1_A_FDSW210055060-2r | T     | 5007 | 5007 | 1 | C -> T         | 31       | SNP (transition)   | 38.70%         | 5.40E-25 |
| Variants:<br>VaAres1_A_FDSW210055060-2r | C     | 5009 | 5009 | 1 | A -> C         | 27       | SNP (transversion) | 29.60%         | 3.40E-15 |
| Variants:<br>VaAres1_A_FDSW210055060-2r | TG    | 5011 | 5012 | 2 | GC -> TG       | 20 -> 22 | Substitution       | 25.0% -> 31.8% | 1.40E-07 |
| Variants:<br>VaAres1_A_FDSW210055060-2r | C     | 5579 | 5579 | 1 | G -> C         | 19       | SNP (transversion) | 100.00%        | 3.20E-67 |
| Variants:<br>VaAres1_A_FDSW210055060-2r | T     | 5581 | 5581 | 1 | A -> T         | 19       | SNP (transversion) | 100.00%        | 1.00E-57 |
| Variants:<br>VaAres1_A_FDSW210055060-2r | CG    | 5583 | 5584 | 2 | TA -> CG       | 17 -> 18 | Substitution       | 100.00%        | 3.20E-60 |
| Variants:<br>VaAres1_A_FDSW210055060-2r | GTC   | 5605 | 5607 | 3 | TAA -> GTC     | 18 -> 19 | Substitution       | 33.3% -> 36.8% | 6.50E-08 |
| Variants:<br>VaAres1_A_FDSW210055060-2r | TT    | 5609 | 5610 | 2 | AA -> TT       | 19       | Substitution       | 36.80%         | 1.10E-08 |
| Variants:<br>VaAres1_A_FDSW210055060-2r | AA    | 5612 | 5613 | 2 | GC -> AA       | 24       | Substitution       | 54.20%         | 1.90E-29 |
| Variants:<br>VaAres1_A_FDSW210055060-2r | GGG   | 5615 | 5617 | 3 | TTA -> GGG     | 26 -> 29 | Substitution       | 53.8% -> 62.1% | 2.30E-27 |
| Variants:<br>VaAres1_A_FDSW210055060-2r | A     | 5618 | 5618 | 1 | G -> A         | 28       | SNP (transition)   | 64.30%         | 1.30E-47 |
| Variants:<br>VaAres1_A_FDSW210055060-2r | T     | 5618 | 5618 | 1 | G -> T         | 28       | SNP (transversion) | 32.10%         | 5.40E-20 |
| Variants:<br>VaAres1_A_FDSW210055060-2r | GT    | 5619 | 5620 | 2 | TC -> GT       | 27 -> 28 | Substitution       | 92.9% -> 96.3% | 9.40E-66 |
| Variants:<br>VaAres1_A_FDSW210055060-2r | C     | 5621 | 5621 | 1 | G -> C         | 28       | SNP (transversion) | 75.00%         | 1.20E-57 |
| Variants:<br>VaAres1_A_FDSW210055060-2r | T     | 5622 | 5622 | 1 | C -> T         | 31       | SNP (transition)   | 93.50%         | 4.60E-85 |
| Variants:<br>VaAres1_A_FDSW210055060-2r | G     | 5623 | 5623 | 1 | C -> G         | 33       | SNP (transversion) | 66.70%         | 1.90E-58 |
| Variants:<br>VaAres1_A_FDSW210055060-2r | AAA   | 5624 | 5626 | 3 | TTG -> AAA     | 31 -> 32 | Substitution       | 74.2% -> 75.0% | 7.80E-63 |
| Variants:<br>VaAres1_A_FDSW210055060-2r | TTATG | 5632 | 5636 | 5 | AATCA -> TTATG | 37 -> 43 | Substitution       | 65.0% -> 70.3% | 3.30E-71 |
| Variants:<br>VaAres1_A_FDSW210055060-2r | AA    | 5637 | 5638 | 2 | TT -> AA       | 44 -> 45 | Substitution       | 72.7% -> 73.3% | 1.10E-82 |

|                                         |      |      |      |   |              |             |                                             |                   |           |
|-----------------------------------------|------|------|------|---|--------------|-------------|---------------------------------------------|-------------------|-----------|
| Variants:<br>VaAres1_A_FDSW210055060-2r | AG   | 5645 | 5646 | 2 | TC -> AG     | 54 -><br>57 | Substitution<br>Deletion<br>(tandem repeat) | 70.2% -><br>74.1% | 1.40E-102 |
| Variants:<br>VaAres1_A_FDSW210055060-2r | T    | 5653 | 5653 | 1 | G -> T       | 65          | SNP<br>(transversion)                       | 61.50%            | 2.40E-39  |
| Variants:<br>VaAres1_A_FDSW210055060-2r | GC   | 5658 | 5657 | 0 | #NAME?       | 115         | Insertion                                   | 43.50%            | 1.10E-112 |
| Variants:<br>VaAres1_B_FDSW210055061-2r | TGGT | 79   | 82   | 4 | CCTG -> TGGT | 63 -><br>67 | Substitution                                | 85.7% -><br>89.1% | 1.40E-137 |
| Variants:<br>VaAres1_B_FDSW210055061-2r | G    | 84   | 84   | 1 | A -> G       | 46          | SNP<br>(transition)                         | 97.80%            | 4.60E-107 |
| Variants:<br>VaAres1_B_FDSW210055061-2r | GGGG | 86   | 89   | 4 | CATC -> GGGG | 32 -><br>39 | Substitution                                | 87.5% -><br>89.7% | 4.90E-58  |
| Variants:<br>VaAres1_B_FDSW210055061-2r | C    | 91   | 91   | 1 | T -> C       | 30          | SNP<br>(transition)                         | 80.00%            | 3.40E-38  |
| Variants:<br>VaAres1_B_FDSW210055061-2r | GGA  | 93   | 95   | 3 | CAC -> GGA   | 26 -><br>27 | Substitution                                | 73.1% -><br>81.5% | 2.10E-29  |
| Variants:<br>VaAres1_B_FDSW210055061-2r | T    | 97   | 97   | 1 | A -> T       | 30          | SNP<br>(transversion)                       | 50.00%            | 1.20E-19  |
| Variants:<br>VaAres1_B_FDSW210055061-2r | GAA  | 99   | 101  | 3 | CGT -> GAA   | 30 -><br>34 | Substitution                                | 28.1% -><br>40.0% | 2.30E-11  |
| Variants:<br>VaAres1_B_FDSW210055061-2r | C    | 102  | 102  | 1 | T -> C       | 33          | SNP<br>(transition)                         | 57.60%            | 3.10E-24  |
| Variants:<br>VaAres1_B_FDSW210055061-2r | T    | 126  | 126  | 1 | C -> T       | 192         | SNP<br>(transition)                         | 43.20%            | 6.40E-79  |
| Variants:<br>VaAres1_B_FDSW210055061-2r | T    | 129  | 129  | 1 | C -> T       | 207         | SNP<br>(transition)                         | 76.80%            | 2.00E-271 |
| Variants:<br>VaAres1_B_FDSW210055061-2r | G    | 132  | 132  | 1 | C -> G       | 227         | SNP<br>(transversion)                       | 34.80%            | 2.70E-120 |
| Variants:<br>VaAres1_B_FDSW210055061-2r | T    | 144  | 144  | 1 | C -> T       | 291         | SNP<br>(transition)                         | 43.60%            | 1.10E-157 |
| Variants:<br>VaAres1_B_FDSW210055061-2r | G    | 150  | 150  | 1 | C -> G       | 325         | SNP<br>(transversion)                       | 33.50%            | 2.10E-152 |
| Variants:<br>VaAres1_B_FDSW210055061-2r | A    | 159  | 159  | 1 | G -> A       | 353         | SNP<br>(transition)                         | 73.90%            | 0         |
| Variants:<br>VaAres1_B_FDSW210055061-2r | A    | 165  | 165  | 1 | T -> A       | 379         | SNP<br>(transversion)                       | 37.70%            | 2.90E-208 |
| Variants:<br>VaAres1_B_FDSW210055061-2r | A    | 183  | 183  | 1 | G -> A       | 453         | SNP<br>(transition)                         | 32.50%            | 6.70E-217 |
| Variants:<br>VaAres1_B_FDSW210055061-2r | A    | 192  | 192  | 1 | G -> A       | 485         | SNP<br>(transition)                         | 37.70%            | 0         |
| Variants:<br>VaAres1_B_FDSW210055061-2r | A    | 201  | 201  | 1 | G -> A       | 517         | SNP<br>(transition)                         | 26.30%            | 2.80E-240 |

|     |      |        |           |
|-----|------|--------|-----------|
| SNP | 579  | 28.20% | 0         |
| SNP | 607  | 25.50% | 1.10E-286 |
| SNP | 607  | 44.30% | 0         |
| SNP | 650  | 31.50% | 2.60E-198 |
| SNP | 661  | 38.30% | 5.6E-319  |
| SNP | 625  | 44.30% | 0         |
| SNP | 636  | 25.20% | 8.90E-279 |
| SNP | 884  | 58.40% | 0         |
| SNP | 911  | 59.90% | 0         |
| SNP | 923  | 80.00% | 0         |
| SNP | 934  | 54.80% | 0         |
| SNP | 1031 | 55.70% | 0         |
| SNP | 1051 | 47.00% | 0         |
| SNP | 1058 | 35.90% | 0         |
| SNP | 1134 | 32.00% | 0         |
| SNP | 1134 | 32.10% | 0         |
| SNP | 1131 | 32.00% | 0         |
| SNP | 1135 | 62.90% | 0         |
| SNP | 1136 | 62.40% | 0         |
| SNP | 1153 | 48.70% | 0         |
| SNP | 1137 | 50.80% | 0         |
| SNP | 1128 | 25.40% | 0         |

|              |          |                |           |
|--------------|----------|----------------|-----------|
| SNP          | 1106     | 43.70%         | 0         |
| SNP          | 1082     | 30.20%         | 0         |
| SNP          | 1032     | 54.70%         | 0         |
| SNP          | 1039     | 36.40%         | 0         |
| SNP          | 1028     | 62.70%         | 0         |
| SNP          | 1027     | 42.70%         | 0         |
| SNP          | 976      | 33.10%         | 0         |
| SNP          | 941      | 31.10%         | 0         |
| SNP          | 892      | 36.00%         | 0         |
| SNP          | 465      | 72.50%         | 0         |
| SNP          | 328      | 73.80%         | 0         |
| SNP          | 285      | 67.00%         | 0         |
| SNP          | 274      | 66.80%         | 0         |
| SNP          | 263      | 70.70%         | 0         |
| SNP          | 249      | 70.30%         | 0         |
| SNP          | 182      | 70.30%         | 0         |
| SNP          | 140      | 72.10%         | 8.40E-259 |
| SNP          | 123      | 76.40%         | 2.00E-273 |
| SNP          | 91       | 26.40%         | 1.40E-29  |
| Substitution | 81 -> 85 | 31.7% -> 38.8% | 2.70E-34  |
| SNP          | 88       | 56.80%         | 1.10E-105 |
| SNP          | 87       | 52.90%         | 1.00E-90  |



|                                          |       |      |      |   |                |               |                       |                   |           |        |                             |                          |                  |                |
|------------------------------------------|-------|------|------|---|----------------|---------------|-----------------------|-------------------|-----------|--------|-----------------------------|--------------------------|------------------|----------------|
| Variables:<br>VaAres1_B_FDSW210055061-2r | C     | 750  | 750  | 1 | A -> C         | 88            | SNP<br>(transversion) | 27.30%            | 1.90E-39  |        |                             |                          |                  |                |
| Variables:<br>VaAres1_B_FDSW210055061-2r | G     | 750  | 750  | 1 | A -> G         | 88            | SNP<br>(transition)   | 55.70%            | 3.20E-93  |        |                             |                          |                  |                |
| Variables:<br>VaAres1_B_FDSW210055061-2r | TTCGA | 751  | 755  | 5 | CCTTG -> TTCGA | 80 -><br>93   | Substitution          | 25.0% -><br>43.8% | 2.20E-24  |        |                             |                          |                  |                |
| Variables:<br>VaAres1_B_FDSW210055061-2r | C     | 756  | 756  | 1 | G -> C         | 82            | SNP<br>(transversion) | 48.80%            | 3.70E-81  |        |                             |                          |                  |                |
| Variables:<br>VaAres1_B_FDSW210055061-2r | A     | 768  | 768  | 1 | T -> A         | 120           | SNP<br>(transversion) | 59.20%            | 1.20E-179 |        |                             |                          |                  |                |
| Variables:<br>VaAres1_B_FDSW210055061-2r | T     | 790  | 790  | 1 | G -> T         | 229           | SNP<br>(transversion) | 29.30%            | 1.50E-129 | R -> L | hypothetical<br>protein CDS | hypothetica<br>l protein | Substituti<br>on | KLI69<br>879.1 |
| Variables:<br>VaAres1_B_FDSW210055061-2r | A     | 795  | 795  | 1 | G -> A         | 248           | SNP<br>(transition)   | 51.20%            | 9.20E-296 | A -> T | hypothetical<br>protein CDS | hypothetica<br>l protein | Substituti<br>on | KLI69<br>879.1 |
| Variables:<br>VaAres1_B_FDSW210055061-2r | AAT   | 801  | 803  | 2 | CAC -> AAT     | 273 -><br>286 | Substitution          | 71.3% -><br>74.7% | 0         | H -> N | hypothetical<br>protein CDS | hypothetica<br>l protein | Substituti<br>on | KLI69<br>879.1 |
| Variables:<br>VaAres1_B_FDSW210055061-2r | C     | 834  | 834  | 1 | T -> C         | 434           | SNP<br>(transition)   | 75.60%            | 0         | Y -> H | hypothetical<br>protein CDS | hypothetica<br>l protein | Substituti<br>on | KLI69<br>879.1 |
| Variables:<br>VaAres1_B_FDSW210055061-2r | G     | 888  | 888  | 1 | A -> G         | 590           | SNP<br>(transition)   | 32.40%            | 0         | I -> V | hypothetical<br>protein CDS | hypothetica<br>l protein | Substituti<br>on | KLI69<br>879.1 |
| Variables:<br>VaAres1_B_FDSW210055061-2r | C     | 897  | 897  | 1 | T -> C         | 598           | SNP<br>(transition)   | 58.00%            | 0         | C -> R | hypothetical<br>protein CDS | hypothetica<br>l protein | Substituti<br>on | KLI69<br>879.1 |
| Variables:<br>VaAres1_B_FDSW210055061-2r | C     | 900  | 900  | 1 | G -> C         | 606           | SNP<br>(transversion) | 58.40%            | 0         | D -> H | hypothetical<br>protein CDS | hypothetica<br>l protein | Substituti<br>on | KLI69<br>879.1 |
| Variables:<br>VaAres1_B_FDSW210055061-2r | C     | 942  | 942  | 1 | G -> C         | 561           | SNP<br>(transversion) | 26.70%            | 4.00E-251 | G -> R | hypothetical<br>protein CDS | hypothetica<br>l protein | Substituti<br>on | KLI69<br>879.1 |
| Variables:<br>VaAres1_B_FDSW210055061-2r | TGT   | 966  | 968  | 2 | AGC -> TGT     | 540 -><br>547 | Substitution          | 43.0% -><br>43.9% | 0         | S -> C | hypothetical<br>protein CDS | hypothetica<br>l protein | Substituti<br>on | KLI69<br>879.1 |
| Variables:<br>VaAres1_B_FDSW210055061-2r | G     | 969  | 969  | 1 | C -> G         | 539           | SNP<br>(transversion) | 30.80%            | 3.20E-240 | P -> A | hypothetical<br>protein CDS | hypothetica<br>l protein | Substituti<br>on | KLI69<br>879.1 |
| Variables:<br>VaAres1_B_FDSW210055061-2r | A     | 976  | 976  | 1 | T -> A         | 535           | SNP<br>(transversion) | 32.90%            | 8.10E-226 | V -> E | hypothetical<br>protein CDS | hypothetica<br>l protein | Substituti<br>on | KLI69<br>879.1 |
| Variables:<br>VaAres1_B_FDSW210055061-2r | A     | 1008 | 1008 | 1 | G -> A         | 512           | SNP<br>(transition)   | 40.60%            | 2.70E-269 | V -> I | hypothetical<br>protein CDS | hypothetica<br>l protein | Substituti<br>on | KLI69<br>879.1 |
| Variables:<br>VaAres1_B_FDSW210055061-2r | C     | 1035 | 1035 | 1 | G -> C         | 558           | SNP<br>(transversion) | 33.70%            | 7.8E-318  | G -> R | hypothetical<br>protein CDS | hypothetica<br>l protein | Substituti<br>on | KLI69<br>879.1 |
| Variables:<br>VaAres1_B_FDSW210055061-2r | A     | 1041 | 1041 | 1 | G -> A         | 557           | SNP<br>(transition)   | 41.50%            | 0         | A -> T | hypothetical<br>protein CDS | hypothetica<br>l protein | Substituti<br>on | KLI69<br>879.1 |
| Variables:<br>VaAres1_B_FDSW210055061-2r | C     | 1049 | 1049 | 1 | T -> C         | 554           | SNP<br>(transition)   | 31.60%            | 0         |        | hypothetical<br>protein CDS | hypothetica<br>l protein | None             | KLI69<br>879.1 |
| Variables:<br>VaAres1_B_FDSW210055061-2r | G     | 1083 | 1083 | 1 | A -> G         | 566           | SNP<br>(transition)   | 42.00%            | 0         | K -> E | hypothetical<br>protein CDS | hypothetica<br>l protein | Substituti<br>on | KLI69<br>879.1 |
| Variables:<br>VaAres1_B_FDSW210055061-2r | A     | 1100 | 1100 | 1 | G -> A         | 572           | SNP<br>(transition)   | 43.20%            | 0         |        | hypothetical<br>protein CDS | hypothetica<br>l protein | None             | KLI69<br>879.1 |

|   |   |   |   |   |   |   |   |   |    |    |    |    |    |    |    |    |    |    |    |    |    |    |    |    |    |    |    |    |    |    |    |    |    |    |    |    |    |    |    |    |    |    |    |    |    |    |    |    |    |    |    |    |    |    |    |    |    |    |    |    |    |    |    |    |    |    |    |    |    |    |    |    |    |    |    |    |    |    |    |    |    |    |    |    |    |    |    |    |    |    |    |    |    |    |    |    |    |    |     |     |     |     |     |     |     |     |     |     |     |     |     |     |     |     |     |     |     |     |     |     |     |     |     |     |     |     |     |     |     |     |     |     |     |     |     |     |     |     |     |     |     |     |     |     |     |     |     |     |     |     |     |     |     |     |     |     |     |     |     |     |     |     |     |     |     |     |     |     |     |     |     |     |     |     |     |     |     |     |     |     |     |     |     |     |     |     |     |     |     |     |     |     |     |     |     |     |     |     |     |     |     |     |     |     |     |     |     |     |     |     |     |     |     |     |     |     |     |     |     |     |     |     |     |     |     |     |     |     |     |     |     |     |     |     |     |     |     |     |     |     |     |     |     |     |     |     |     |     |     |     |     |     |     |     |     |     |     |     |     |     |     |     |     |     |     |     |     |     |     |     |     |     |     |     |     |     |     |     |     |     |     |     |     |     |     |     |     |     |     |     |     |     |     |     |     |     |     |     |     |     |     |     |     |     |     |     |     |     |     |     |     |     |     |     |     |     |     |     |     |     |     |     |     |     |     |     |     |     |     |     |     |     |     |     |     |     |     |     |     |     |     |     |     |     |     |     |     |     |     |     |     |     |     |     |     |     |     |     |     |     |     |     |     |     |     |     |     |     |     |     |     |     |     |     |     |     |     |     |     |     |     |     |     |     |     |     |     |     |     |     |     |     |     |     |     |     |     |     |     |     |     |     |     |     |     |     |     |     |     |     |     |     |     |     |     |     |     |     |     |     |     |     |     |     |     |     |     |     |     |     |     |     |     |     |     |     |     |     |     |     |     |     |     |     |     |     |     |     |     |     |     |     |     |     |     |     |     |     |     |     |     |     |     |     |     |     |     |     |     |     |     |     |     |     |     |     |     |     |     |     |     |     |     |     |     |     |     |     |     |     |     |     |     |     |     |     |     |     |     |     |     |     |     |     |     |     |     |     |     |     |     |     |     |     |     |     |     |     |     |     |     |     |     |     |
|---|---|---|---|---|---|---|---|---|----|----|----|----|----|----|----|----|----|----|----|----|----|----|----|----|----|----|----|----|----|----|----|----|----|----|----|----|----|----|----|----|----|----|----|----|----|----|----|----|----|----|----|----|----|----|----|----|----|----|----|----|----|----|----|----|----|----|----|----|----|----|----|----|----|----|----|----|----|----|----|----|----|----|----|----|----|----|----|----|----|----|----|----|----|----|----|----|----|----|-----|-----|-----|-----|-----|-----|-----|-----|-----|-----|-----|-----|-----|-----|-----|-----|-----|-----|-----|-----|-----|-----|-----|-----|-----|-----|-----|-----|-----|-----|-----|-----|-----|-----|-----|-----|-----|-----|-----|-----|-----|-----|-----|-----|-----|-----|-----|-----|-----|-----|-----|-----|-----|-----|-----|-----|-----|-----|-----|-----|-----|-----|-----|-----|-----|-----|-----|-----|-----|-----|-----|-----|-----|-----|-----|-----|-----|-----|-----|-----|-----|-----|-----|-----|-----|-----|-----|-----|-----|-----|-----|-----|-----|-----|-----|-----|-----|-----|-----|-----|-----|-----|-----|-----|-----|-----|-----|-----|-----|-----|-----|-----|-----|-----|-----|-----|-----|-----|-----|-----|-----|-----|-----|-----|-----|-----|-----|-----|-----|-----|-----|-----|-----|-----|-----|-----|-----|-----|-----|-----|-----|-----|-----|-----|-----|-----|-----|-----|-----|-----|-----|-----|-----|-----|-----|-----|-----|-----|-----|-----|-----|-----|-----|-----|-----|-----|-----|-----|-----|-----|-----|-----|-----|-----|-----|-----|-----|-----|-----|-----|-----|-----|-----|-----|-----|-----|-----|-----|-----|-----|-----|-----|-----|-----|-----|-----|-----|-----|-----|-----|-----|-----|-----|-----|-----|-----|-----|-----|-----|-----|-----|-----|-----|-----|-----|-----|-----|-----|-----|-----|-----|-----|-----|-----|-----|-----|-----|-----|-----|-----|-----|-----|-----|-----|-----|-----|-----|-----|-----|-----|-----|-----|-----|-----|-----|-----|-----|-----|-----|-----|-----|-----|-----|-----|-----|-----|-----|-----|-----|-----|-----|-----|-----|-----|-----|-----|-----|-----|-----|-----|-----|-----|-----|-----|-----|-----|-----|-----|-----|-----|-----|-----|-----|-----|-----|-----|-----|-----|-----|-----|-----|-----|-----|-----|-----|-----|-----|-----|-----|-----|-----|-----|-----|-----|-----|-----|-----|-----|-----|-----|-----|-----|-----|-----|-----|-----|-----|-----|-----|-----|-----|-----|-----|-----|-----|-----|-----|-----|-----|-----|-----|-----|-----|-----|-----|-----|-----|-----|-----|-----|-----|-----|-----|-----|-----|-----|-----|-----|-----|-----|-----|-----|-----|-----|-----|-----|-----|-----|-----|-----|-----|-----|-----|-----|-----|-----|-----|-----|-----|-----|-----|-----|-----|-----|-----|-----|-----|-----|-----|-----|-----|-----|-----|-----|-----|-----|-----|-----|-----|-----|-----|-----|-----|-----|-----|-----|-----|-----|-----|-----|-----|-----|-----|-----|-----|-----|-----|-----|-----|-----|-----|-----|-----|-----|-----|-----|-----|-----|-----|-----|-----|-----|-----|-----|-----|-----|
| 1 | 2 | 3 | 4 | 5 | 6 | 7 | 8 | 9 | 10 | 11 | 12 | 13 | 14 | 15 | 16 | 17 | 18 | 19 | 20 | 21 | 22 | 23 | 24 | 25 | 26 | 27 | 28 | 29 | 30 | 31 | 32 | 33 | 34 | 35 | 36 | 37 | 38 | 39 | 40 | 41 | 42 | 43 | 44 | 45 | 46 | 47 | 48 | 49 | 50 | 51 | 52 | 53 | 54 | 55 | 56 | 57 | 58 | 59 | 60 | 61 | 62 | 63 | 64 | 65 | 66 | 67 | 68 | 69 | 70 | 71 | 72 | 73 | 74 | 75 | 76 | 77 | 78 | 79 | 80 | 81 | 82 | 83 | 84 | 85 | 86 | 87 | 88 | 89 | 90 | 91 | 92 | 93 | 94 | 95 | 96 | 97 | 98 | 99 | 100 | 101 | 102 | 103 | 104 | 105 | 106 | 107 | 108 | 109 | 110 | 111 | 112 | 113 | 114 | 115 | 116 | 117 | 118 | 119 | 120 | 121 | 122 | 123 | 124 | 125 | 126 | 127 | 128 | 129 | 130 | 131 | 132 | 133 | 134 | 135 | 136 | 137 | 138 | 139 | 140 | 141 | 142 | 143 | 144 | 145 | 146 | 147 | 148 | 149 | 150 | 151 | 152 | 153 | 154 | 155 | 156 | 157 | 158 | 159 | 160 | 161 | 162 | 163 | 164 | 165 | 166 | 167 | 168 | 169 | 170 | 171 | 172 | 173 | 174 | 175 | 176 | 177 | 178 | 179 | 180 | 181 | 182 | 183 | 184 | 185 | 186 | 187 | 188 | 189 | 190 | 191 | 192 | 193 | 194 | 195 | 196 | 197 | 198 | 199 | 200 | 201 | 202 | 203 | 204 | 205 | 206 | 207 | 208 | 209 | 210 | 211 | 212 | 213 | 214 | 215 | 216 | 217 | 218 | 219 | 220 | 221 | 222 | 223 | 224 | 225 | 226 | 227 | 228 | 229 | 230 | 231 | 232 | 233 | 234 | 235 | 236 | 237 | 238 | 239 | 240 | 241 | 242 | 243 | 244 | 245 | 246 | 247 | 248 | 249 | 250 | 251 | 252 | 253 | 254 | 255 | 256 | 257 | 258 | 259 | 260 | 261 | 262 | 263 | 264 | 265 | 266 | 267 | 268 | 269 | 270 | 271 | 272 | 273 | 274 | 275 | 276 | 277 | 278 | 279 | 280 | 281 | 282 | 283 | 284 | 285 | 286 | 287 | 288 | 289 | 290 | 291 | 292 | 293 | 294 | 295 | 296 | 297 | 298 | 299 | 300 | 301 | 302 | 303 | 304 | 305 | 306 | 307 | 308 | 309 | 310 | 311 | 312 | 313 | 314 | 315 | 316 | 317 | 318 | 319 | 320 | 321 | 322 | 323 | 324 | 325 | 326 | 327 | 328 | 329 | 330 | 331 | 332 | 333 | 334 | 335 | 336 | 337 | 338 | 339 | 340 | 341 | 342 | 343 | 344 | 345 | 346 | 347 | 348 | 349 | 350 | 351 | 352 | 353 | 354 | 355 | 356 | 357 | 358 | 359 | 360 | 361 | 362 | 363 | 364 | 365 | 366 | 367 | 368 | 369 | 370 | 371 | 372 | 373 | 374 | 375 | 376 | 377 | 378 | 379 | 380 | 381 | 382 | 383 | 384 | 385 | 386 | 387 | 388 | 389 | 390 | 391 | 392 | 393 | 394 | 395 | 396 | 397 | 398 | 399 | 400 | 401 | 402 | 403 | 404 | 405 | 406 | 407 | 408 | 409 | 410 | 411 | 412 | 413 | 414 | 415 | 416 | 417 | 418 | 419 | 420 | 421 | 422 | 423 | 424 | 425 | 426 | 427 | 428 | 429 | 430 | 431 | 432 | 433 | 434 | 435 | 436 | 437 | 438 | 439 | 440 | 441 | 442 | 443 | 444 | 445 | 446 | 447 | 448 | 449 | 450 | 451 | 452 | 453 | 454 | 455 | 456 | 457 | 458 | 459 | 460 | 461 | 462 | 463 | 464 | 465 | 466 | 467 | 468 | 469 | 470 | 471 | 472 | 473 | 474 | 475 | 476 | 477 | 478 | 479 | 480 | 481 | 482 | 483 | 484 | 485 | 486 | 487 | 488 | 489 | 490 | 491 | 492 | 493 | 494 | 495 | 496 | 497 | 498 | 499 | 500 | 501 | 502 | 503 | 504 | 505 | 506 | 507 | 508 | 509 | 510 | 511 | 512 | 513 | 514 | 515 | 516 | 517 | 518 | 519 | 520 | 521 | 522 | 523 | 524 | 525 |
|---|---|---|---|---|---|---|---|---|----|----|----|----|----|----|----|----|----|----|----|----|----|----|----|----|----|----|----|----|----|----|----|----|----|----|----|----|----|----|----|----|----|----|----|----|----|----|----|----|----|----|----|----|----|----|----|----|----|----|----|----|----|----|----|----|----|----|----|----|----|----|----|----|----|----|----|----|----|----|----|----|----|----|----|----|----|----|----|----|----|----|----|----|----|----|----|----|----|----|-----|-----|-----|-----|-----|-----|-----|-----|-----|-----|-----|-----|-----|-----|-----|-----|-----|-----|-----|-----|-----|-----|-----|-----|-----|-----|-----|-----|-----|-----|-----|-----|-----|-----|-----|-----|-----|-----|-----|-----|-----|-----|-----|-----|-----|-----|-----|-----|-----|-----|-----|-----|-----|-----|-----|-----|-----|-----|-----|-----|-----|-----|-----|-----|-----|-----|-----|-----|-----|-----|-----|-----|-----|-----|-----|-----|-----|-----|-----|-----|-----|-----|-----|-----|-----|-----|-----|-----|-----|-----|-----|-----|-----|-----|-----|-----|-----|-----|-----|-----|-----|-----|-----|-----|-----|-----|-----|-----|-----|-----|-----|-----|-----|-----|-----|-----|-----|-----|-----|-----|-----|-----|-----|-----|-----|-----|-----|-----|-----|-----|-----|-----|-----|-----|-----|-----|-----|-----|-----|-----|-----|-----|-----|-----|-----|-----|-----|-----|-----|-----|-----|-----|-----|-----|-----|-----|-----|-----|-----|-----|-----|-----|-----|-----|-----|-----|-----|-----|-----|-----|-----|-----|-----|-----|-----|-----|-----|-----|-----|-----|-----|-----|-----|-----|-----|-----|-----|-----|-----|-----|-----|-----|-----|-----|-----|-----|-----|-----|-----|-----|-----|-----|-----|-----|-----|-----|-----|-----|-----|-----|-----|-----|-----|-----|-----|-----|-----|-----|-----|-----|-----|-----|-----|-----|-----|-----|-----|-----|-----|-----|-----|-----|-----|-----|-----|-----|-----|-----|-----|-----|-----|-----|-----|-----|-----|-----|-----|-----|-----|-----|-----|-----|-----|-----|-----|-----|-----|-----|-----|-----|-----|-----|-----|-----|-----|-----|-----|-----|-----|-----|-----|-----|-----|-----|-----|-----|-----|-----|-----|-----|-----|-----|-----|-----|-----|-----|-----|-----|-----|-----|-----|-----|-----|-----|-----|-----|-----|-----|-----|-----|-----|-----|-----|-----|-----|-----|-----|-----|-----|-----|-----|-----|-----|-----|-----|-----|-----|-----|-----|-----|-----|-----|-----|-----|-----|-----|-----|-----|-----|-----|-----|-----|-----|-----|-----|-----|-----|-----|-----|-----|-----|-----|-----|-----|-----|-----|-----|-----|-----|-----|-----|-----|-----|-----|-----|-----|-----|-----|-----|-----|-----|-----|-----|-----|-----|-----|-----|-----|-----|-----|-----|-----|-----|-----|-----|-----|-----|-----|-----|-----|-----|-----|-----|-----|-----|-----|-----|-----|-----|-----|-----|-----|-----|-----|-----|-----|-----|-----|-----|-----|-----|-----|-----|-----|-----|-----|-----|-----|-----|-----|-----|-----|-----|-----|-----|-----|-----|-----|-----|-----|-----|-----|-----|-----|-----|-----|

|   |   |   |   |   |   |   |   |   |    |    |    |    |    |    |    |    |    |    |    |    |    |    |    |    |    |    |    |    |    |    |    |    |    |    |    |    |    |    |    |    |    |    |    |    |    |    |    |    |    |    |    |    |    |    |    |    |    |    |    |    |    |    |    |    |    |    |    |    |    |    |    |    |    |    |    |    |    |    |    |    |    |    |    |    |    |    |    |    |    |    |    |    |    |    |    |    |    |    |     |     |     |     |     |     |     |     |     |     |     |     |     |     |     |     |     |     |     |     |     |     |     |     |     |     |     |     |     |     |     |     |     |     |     |     |     |     |     |     |     |     |     |     |     |     |     |     |     |     |     |     |     |     |     |     |     |     |     |     |     |     |     |     |     |     |     |     |     |     |     |     |     |     |     |     |     |     |     |     |     |     |     |     |     |     |     |     |     |     |     |     |     |     |     |     |     |     |     |     |     |     |     |     |     |     |     |     |     |     |     |     |     |     |     |     |     |     |     |     |     |     |     |     |     |     |     |     |     |     |     |     |     |     |     |     |     |     |     |     |     |     |     |     |     |     |     |     |     |     |     |     |     |     |     |     |     |     |     |     |     |     |     |     |     |     |     |     |     |     |     |     |     |     |     |     |     |     |     |     |     |     |     |     |     |     |     |     |     |     |     |     |     |     |     |     |     |     |     |     |     |     |     |     |     |     |     |     |     |     |     |     |     |     |     |     |     |     |     |     |     |     |     |     |     |     |     |     |     |     |     |     |     |     |     |     |     |     |     |     |     |     |     |     |     |     |     |     |     |     |     |     |     |     |     |     |     |     |     |     |     |     |     |     |     |     |     |     |     |     |     |     |     |     |     |     |     |     |     |     |     |     |     |     |     |     |     |     |     |     |     |     |     |     |     |     |     |     |     |     |     |     |     |     |     |     |     |     |     |     |     |     |     |     |     |     |     |     |     |     |     |     |     |     |     |     |     |     |     |     |     |     |     |     |     |     |     |     |     |     |     |     |     |     |     |     |     |     |     |     |     |     |     |     |     |     |     |     |     |     |     |     |     |     |     |     |     |     |     |     |     |     |     |     |     |     |     |     |     |     |     |     |     |     |     |     |     |     |     |     |     |     |     |     |     |     |     |     |     |     |     |     |     |     |     |     |     |     |     |     |     |     |     |     |     |     |     |     |     |     |     |     |     |     |     |     |
|---|---|---|---|---|---|---|---|---|----|----|----|----|----|----|----|----|----|----|----|----|----|----|----|----|----|----|----|----|----|----|----|----|----|----|----|----|----|----|----|----|----|----|----|----|----|----|----|----|----|----|----|----|----|----|----|----|----|----|----|----|----|----|----|----|----|----|----|----|----|----|----|----|----|----|----|----|----|----|----|----|----|----|----|----|----|----|----|----|----|----|----|----|----|----|----|----|----|----|-----|-----|-----|-----|-----|-----|-----|-----|-----|-----|-----|-----|-----|-----|-----|-----|-----|-----|-----|-----|-----|-----|-----|-----|-----|-----|-----|-----|-----|-----|-----|-----|-----|-----|-----|-----|-----|-----|-----|-----|-----|-----|-----|-----|-----|-----|-----|-----|-----|-----|-----|-----|-----|-----|-----|-----|-----|-----|-----|-----|-----|-----|-----|-----|-----|-----|-----|-----|-----|-----|-----|-----|-----|-----|-----|-----|-----|-----|-----|-----|-----|-----|-----|-----|-----|-----|-----|-----|-----|-----|-----|-----|-----|-----|-----|-----|-----|-----|-----|-----|-----|-----|-----|-----|-----|-----|-----|-----|-----|-----|-----|-----|-----|-----|-----|-----|-----|-----|-----|-----|-----|-----|-----|-----|-----|-----|-----|-----|-----|-----|-----|-----|-----|-----|-----|-----|-----|-----|-----|-----|-----|-----|-----|-----|-----|-----|-----|-----|-----|-----|-----|-----|-----|-----|-----|-----|-----|-----|-----|-----|-----|-----|-----|-----|-----|-----|-----|-----|-----|-----|-----|-----|-----|-----|-----|-----|-----|-----|-----|-----|-----|-----|-----|-----|-----|-----|-----|-----|-----|-----|-----|-----|-----|-----|-----|-----|-----|-----|-----|-----|-----|-----|-----|-----|-----|-----|-----|-----|-----|-----|-----|-----|-----|-----|-----|-----|-----|-----|-----|-----|-----|-----|-----|-----|-----|-----|-----|-----|-----|-----|-----|-----|-----|-----|-----|-----|-----|-----|-----|-----|-----|-----|-----|-----|-----|-----|-----|-----|-----|-----|-----|-----|-----|-----|-----|-----|-----|-----|-----|-----|-----|-----|-----|-----|-----|-----|-----|-----|-----|-----|-----|-----|-----|-----|-----|-----|-----|-----|-----|-----|-----|-----|-----|-----|-----|-----|-----|-----|-----|-----|-----|-----|-----|-----|-----|-----|-----|-----|-----|-----|-----|-----|-----|-----|-----|-----|-----|-----|-----|-----|-----|-----|-----|-----|-----|-----|-----|-----|-----|-----|-----|-----|-----|-----|-----|-----|-----|-----|-----|-----|-----|-----|-----|-----|-----|-----|-----|-----|-----|-----|-----|-----|-----|-----|-----|-----|-----|-----|-----|-----|-----|-----|-----|-----|-----|-----|-----|-----|-----|-----|-----|-----|-----|-----|-----|-----|-----|-----|-----|-----|-----|-----|-----|-----|-----|-----|-----|-----|-----|-----|-----|-----|-----|-----|-----|-----|-----|-----|-----|-----|-----|-----|-----|-----|-----|-----|-----|-----|-----|-----|-----|-----|-----|-----|-----|-----|-----|-----|-----|-----|-----|-----|-----|-----|-----|-----|-----|-----|-----|-----|-----|-----|-----|-----|-----|-----|
| 1 | 2 | 3 | 4 | 5 | 6 | 7 | 8 | 9 | 10 | 11 | 12 | 13 | 14 | 15 | 16 | 17 | 18 | 19 | 20 | 21 | 22 | 23 | 24 | 25 | 26 | 27 | 28 | 29 | 30 | 31 | 32 | 33 | 34 | 35 | 36 | 37 | 38 | 39 | 40 | 41 | 42 | 43 | 44 | 45 | 46 | 47 | 48 | 49 | 50 | 51 | 52 | 53 | 54 | 55 | 56 | 57 | 58 | 59 | 60 | 61 | 62 | 63 | 64 | 65 | 66 | 67 | 68 | 69 | 70 | 71 | 72 | 73 | 74 | 75 | 76 | 77 | 78 | 79 | 80 | 81 | 82 | 83 | 84 | 85 | 86 | 87 | 88 | 89 | 90 | 91 | 92 | 93 | 94 | 95 | 96 | 97 | 98 | 99 | 100 | 101 | 102 | 103 | 104 | 105 | 106 | 107 | 108 | 109 | 110 | 111 | 112 | 113 | 114 | 115 | 116 | 117 | 118 | 119 | 120 | 121 | 122 | 123 | 124 | 125 | 126 | 127 | 128 | 129 | 130 | 131 | 132 | 133 | 134 | 135 | 136 | 137 | 138 | 139 | 140 | 141 | 142 | 143 | 144 | 145 | 146 | 147 | 148 | 149 | 150 | 151 | 152 | 153 | 154 | 155 | 156 | 157 | 158 | 159 | 160 | 161 | 162 | 163 | 164 | 165 | 166 | 167 | 168 | 169 | 170 | 171 | 172 | 173 | 174 | 175 | 176 | 177 | 178 | 179 | 180 | 181 | 182 | 183 | 184 | 185 | 186 | 187 | 188 | 189 | 190 | 191 | 192 | 193 | 194 | 195 | 196 | 197 | 198 | 199 | 200 | 201 | 202 | 203 | 204 | 205 | 206 | 207 | 208 | 209 | 210 | 211 | 212 | 213 | 214 | 215 | 216 | 217 | 218 | 219 | 220 | 221 | 222 | 223 | 224 | 225 | 226 | 227 | 228 | 229 | 230 | 231 | 232 | 233 | 234 | 235 | 236 | 237 | 238 | 239 | 240 | 241 | 242 | 243 | 244 | 245 | 246 | 247 | 248 | 249 | 250 | 251 | 252 | 253 | 254 | 255 | 256 | 257 | 258 | 259 | 260 | 261 | 262 | 263 | 264 | 265 | 266 | 267 | 268 | 269 | 270 | 271 | 272 | 273 | 274 | 275 | 276 | 277 | 278 | 279 | 280 | 281 | 282 | 283 | 284 | 285 | 286 | 287 | 288 | 289 | 290 | 291 | 292 | 293 | 294 | 295 | 296 | 297 | 298 | 299 | 300 | 301 | 302 | 303 | 304 | 305 | 306 | 307 | 308 | 309 | 310 | 311 | 312 | 313 | 314 | 315 | 316 | 317 | 318 | 319 | 320 | 321 | 322 | 323 | 324 | 325 | 326 | 327 | 328 | 329 | 330 | 331 | 332 | 333 | 334 | 335 | 336 | 337 | 338 | 339 | 340 | 341 | 342 | 343 | 344 | 345 | 346 | 347 | 348 | 349 | 350 | 351 | 352 | 353 | 354 | 355 | 356 | 357 | 358 | 359 | 360 | 361 | 362 | 363 | 364 | 365 | 366 | 367 | 368 | 369 | 370 | 371 | 372 | 373 | 374 | 375 | 376 | 377 | 378 | 379 | 380 | 381 | 382 | 383 | 384 | 385 | 386 | 387 | 388 | 389 | 390 | 391 | 392 | 393 | 394 | 395 | 396 | 397 | 398 | 399 | 400 | 401 | 402 | 403 | 404 | 405 | 406 | 407 | 408 | 409 | 410 | 411 | 412 | 413 | 414 | 415 | 416 | 417 | 418 | 419 | 420 | 421 | 422 | 423 | 424 | 425 | 426 | 427 | 428 | 429 | 430 | 431 | 432 | 433 | 434 | 435 | 436 | 437 | 438 | 439 | 440 | 441 | 442 | 443 | 444 | 445 | 446 | 447 | 448 | 449 | 450 | 451 | 452 | 453 | 454 | 455 | 456 | 457 | 458 | 459 | 460 | 461 | 462 | 463 | 464 | 465 | 466 | 467 | 468 | 469 | 470 | 471 | 472 | 473 | 474 | 475 | 476 | 477 | 478 | 479 | 480 | 481 | 482 | 483 | 484 | 485 | 486 | 487 | 488 | 489 | 490 | 491 | 492 | 493 | 494 | 495 | 496 | 497 | 498 | 499 | 500 | 501 | 502 | 503 | 504 | 505 | 506 | 507 | 508 | 509 | 510 | 511 | 512 | 513 | 514 | 515 | 516 | 517 | 518 | 519 | 520 | 521 | 522 | 523 | 524 | 525 |
|---|---|---|---|---|---|---|---|---|----|----|----|----|----|----|----|----|----|----|----|----|----|----|----|----|----|----|----|----|----|----|----|----|----|----|----|----|----|----|----|----|----|----|----|----|----|----|----|----|----|----|----|----|----|----|----|----|----|----|----|----|----|----|----|----|----|----|----|----|----|----|----|----|----|----|----|----|----|----|----|----|----|----|----|----|----|----|----|----|----|----|----|----|----|----|----|----|----|----|-----|-----|-----|-----|-----|-----|-----|-----|-----|-----|-----|-----|-----|-----|-----|-----|-----|-----|-----|-----|-----|-----|-----|-----|-----|-----|-----|-----|-----|-----|-----|-----|-----|-----|-----|-----|-----|-----|-----|-----|-----|-----|-----|-----|-----|-----|-----|-----|-----|-----|-----|-----|-----|-----|-----|-----|-----|-----|-----|-----|-----|-----|-----|-----|-----|-----|-----|-----|-----|-----|-----|-----|-----|-----|-----|-----|-----|-----|-----|-----|-----|-----|-----|-----|-----|-----|-----|-----|-----|-----|-----|-----|-----|-----|-----|-----|-----|-----|-----|-----|-----|-----|-----|-----|-----|-----|-----|-----|-----|-----|-----|-----|-----|-----|-----|-----|-----|-----|-----|-----|-----|-----|-----|-----|-----|-----|-----|-----|-----|-----|-----|-----|-----|-----|-----|-----|-----|-----|-----|-----|-----|-----|-----|-----|-----|-----|-----|-----|-----|-----|-----|-----|-----|-----|-----|-----|-----|-----|-----|-----|-----|-----|-----|-----|-----|-----|-----|-----|-----|-----|-----|-----|-----|-----|-----|-----|-----|-----|-----|-----|-----|-----|-----|-----|-----|-----|-----|-----|-----|-----|-----|-----|-----|-----|-----|-----|-----|-----|-----|-----|-----|-----|-----|-----|-----|-----|-----|-----|-----|-----|-----|-----|-----|-----|-----|-----|-----|-----|-----|-----|-----|-----|-----|-----|-----|-----|-----|-----|-----|-----|-----|-----|-----|-----|-----|-----|-----|-----|-----|-----|-----|-----|-----|-----|-----|-----|-----|-----|-----|-----|-----|-----|-----|-----|-----|-----|-----|-----|-----|-----|-----|-----|-----|-----|-----|-----|-----|-----|-----|-----|-----|-----|-----|-----|-----|-----|-----|-----|-----|-----|-----|-----|-----|-----|-----|-----|-----|-----|-----|-----|-----|-----|-----|-----|-----|-----|-----|-----|-----|-----|-----|-----|-----|-----|-----|-----|-----|-----|-----|-----|-----|-----|-----|-----|-----|-----|-----|-----|-----|-----|-----|-----|-----|-----|-----|-----|-----|-----|-----|-----|-----|-----|-----|-----|-----|-----|-----|-----|-----|-----|-----|-----|-----|-----|-----|-----|-----|-----|-----|-----|-----|-----|-----|-----|-----|-----|-----|-----|-----|-----|-----|-----|-----|-----|-----|-----|-----|-----|-----|-----|-----|-----|-----|-----|-----|-----|-----|-----|-----|-----|-----|-----|-----|-----|-----|-----|-----|-----|-----|-----|-----|-----|-----|-----|-----|-----|-----|-----|-----|-----|-----|-----|-----|-----|-----|-----|-----|-----|-----|-----|-----|-----|-----|-----|-----|-----|-----|-----|-----|-----|-----|-----|-----|-----|-----|-----|

|                                          |     |      |      |   |            |          |                    |                |           |
|------------------------------------------|-----|------|------|---|------------|----------|--------------------|----------------|-----------|
| Variables:<br>VaAres1_B_FDSW210055061-2r | CTG | 2137 | 2139 | 3 | AGC -> CTG | 41 -> 43 | Substitution       | 87.8% -> 88.4% | 1.90E-124 |
| Variables:<br>VaAres1_B_FDSW210055061-2r | AG  | 2141 | 2142 | 2 | TT -> AG   | 44       | Substitution       | 86.40%         | 1.10E-111 |
| Variables:<br>VaAres1_B_FDSW210055061-2r | G   | 2145 | 2145 | 1 | A -> G     | 46       | SNP (transition)   | 95.70%         | 1.00E-151 |
| Variables:<br>VaAres1_B_FDSW210055061-2r | T   | 2147 | 2147 | 1 | A -> T     | 47       | SNP (transversion) | 95.70%         | 1.10E-150 |
| Variables:<br>VaAres1_B_FDSW210055061-2r | G   | 2149 | 2148 | 0 | #NAME?     | 51       | Insertion          | 96.10%         | 2.50E-159 |
| Variables:<br>VaAres1_B_FDSW210055061-2r | GAG | 2902 | 2904 | 3 | TGA -> GAG | 11 -> 14 | Substitution       | 90.9% -> 92.9% | 1.10E-28  |
| Variables:<br>VaAres1_B_FDSW210055061-2r | GGA | 2906 | 2908 | 3 | TCG -> GGA | 9 -> 11  | Substitution       | 77.8% -> 81.8% | 2.30E-17  |
| Variables:<br>VaAres1_B_FDSW210055061-2r | GGG | 2910 | 2912 | 3 | AAC -> GGG | 6 -> 7   | Substitution       | 66.7% -> 71.4% | 9.40E-09  |
| Variables: VaAres1_B_FDSW210055061-2r    |     | 3097 | 3097 | 1 | #NAME?     | 181      | Deletion           | 45.30%         | 4.30E-80  |
| Variables:<br>VaAres1_B_FDSW210055061-2r | G   | 3456 | 3456 | 1 | T -> G     | 10       | SNP (transversion) | 60.00%         | 1.30E-11  |
| Variables:<br>VaAres1_B_FDSW210055061-2r | TT  | 3458 | 3459 | 2 | AA -> TT   | 9        | Substitution       | 44.40%         | 1.90E-07  |
| Variables:<br>VaAres1_B_FDSW210055061-2r | T   | 3659 | 3659 | 1 | G -> T     | 169      | SNP (transversion) | 47.30%         | 3.50E-239 |
| Variables:<br>VaAres1_B_FDSW210055061-2r | C   | 3758 | 3758 | 1 | A -> C     | 162      | SNP (transversion) | 54.90%         | 5.20E-265 |
| Variables:<br>VaAres1_B_FDSW210055061-2r | G   | 3778 | 3778 | 1 | A -> G     | 164      | SNP (transition)   | 45.70%         | 7.80E-208 |
| Variables:<br>VaAres1_B_FDSW210055061-2r | T   | 3780 | 3780 | 1 | C -> T     | 162      | SNP (transition)   | 46.30%         | 2.30E-208 |
| Variables:<br>VaAres1_B_FDSW210055061-2r | C   | 3852 | 3852 | 1 | T -> C     | 162      | SNP (transition)   | 54.90%         | 6.50E-274 |
| Variables:<br>VaAres1_B_FDSW210055061-2r | G   | 3864 | 3864 | 1 | A -> G     | 163      | SNP (transition)   | 44.20%         | 2.40E-205 |
| Variables:<br>VaAres1_B_FDSW210055061-2r | T   | 3922 | 3922 | 1 | C -> T     | 136      | SNP (transition)   | 41.20%         | 4.30E-141 |
| Variables:<br>VaAres1_B_FDSW210055061-2r | T   | 4022 | 4022 | 1 | G -> T     | 28       | SNP (transversion) | 100.00%        | 1.00E-56  |
| Variables:<br>VaAres1_B_FDSW210055061-2r | A   | 4023 | 4023 | 1 | T -> A     | 28       | SNP (transversion) | 60.70%         | 1.60E-32  |
| Variables:<br>VaAres1_B_FDSW210055061-2r | G   | 4023 | 4023 | 1 | T -> G     | 28       | SNP (transversion) | 39.30%         | 3.10E-12  |
| Variables:<br>VaAres1_B_FDSW210055061-2r | T   | 4025 | 4025 | 1 | C -> T     | 26       | SNP (transition)   | 100.00%        | 1.00E-52  |

|                                                                                                                                                                                                                     |           |      |      |    |                      |            |                    |                |          |          |                          |                      |              |            |
|---------------------------------------------------------------------------------------------------------------------------------------------------------------------------------------------------------------------|-----------|------|------|----|----------------------|------------|--------------------|----------------|----------|----------|--------------------------|----------------------|--------------|------------|
| Variants:<br>VaAres1_B_FDSW210055061-2r<br>Variants:<br>VaAres1_B_FDSW210055061-2r<br>Variants:<br>VaAres1_B_FDSW210055061-2r<br>Variants:<br>VaAres1_B_FDSW210055061-2r<br>Variants:<br>VaAres1_B_FDSW210055061-2r | T         | 4027 | 4027 | 1  | A -> T               | 25         | SNP (transversion) | 100.00%        | 3.20E-48 |          |                          |                      |              |            |
| Variants:<br>VaAres1_B_FDSW210055061-2r<br>Variants:<br>VaAres1_B_FDSW210055061-2r<br>Variants:<br>VaAres1_B_FDSW210055061-2r<br>Variants:<br>VaAres1_B_FDSW210055061-2r                                            | TTG       | 4031 | 4033 | 3  | CCA -> TTG           | 24         | Substitution       | 100.00%        | 6.30E-44 |          |                          |                      |              |            |
| Variants:<br>VaAres1_B_FDSW210055061-2r<br>Variants:<br>VaAres1_B_FDSW210055061-2r<br>Variants:<br>VaAres1_B_FDSW210055061-2r<br>Variants:<br>VaAres1_B_FDSW210055061-2r                                            | T         | 4035 | 4035 | 1  | C -> T               | 22         | SNP (transition)   | 68.20%         | 1.60E-28 |          |                          |                      |              |            |
| Variants:<br>VaAres1_B_FDSW210055061-2r<br>Variants:<br>VaAres1_B_FDSW210055061-2r<br>Variants:<br>VaAres1_B_FDSW210055061-2r<br>Variants:<br>VaAres1_B_FDSW210055061-2r                                            | T         | 4036 | 4036 | 1  | G -> T               | 22         | SNP (transversion) | 100.00%        | 2.50E-40 |          |                          |                      |              |            |
| Variants:<br>VaAres1_B_FDSW210055061-2r<br>Variants:<br>VaAres1_B_FDSW210055061-2r<br>Variants:<br>VaAres1_B_FDSW210055061-2r<br>Variants:<br>VaAres1_B_FDSW210055061-2r                                            | T         | 4037 | 4037 | 1  | G -> T               | 21         | SNP (transversion) | 66.70%         | 7.10E-28 |          |                          |                      |              |            |
| Variants: VaAres1_B_FDSW210055061-2r<br>Variants:<br>VaAres1_B_FDSW210055061-2r<br>Variants:<br>VaAres1_B_FDSW210055061-2r<br>Variants:<br>VaAres1_B_FDSW210055061-2r<br>Variants:<br>VaAres1_B_FDSW210055061-2r    |           | 4038 | 4038 | 1  | -C                   | 21         | Deletion           | 100.00%        | 1.60E-17 |          |                          |                      |              |            |
| Variants:<br>VaAres1_B_FDSW210055061-2r<br>Variants:<br>VaAres1_B_FDSW210055061-2r<br>Variants:<br>VaAres1_B_FDSW210055061-2r<br>Variants:<br>VaAres1_B_FDSW210055061-2r<br>Variants:<br>VaAres1_B_FDSW210055061-2r | A         | 4040 | 4040 | 1  | T -> A               | 20         | SNP (transversion) | 100.00%        | 1.00E-34 |          |                          |                      |              |            |
| Variants:<br>VaAres1_B_FDSW210055061-2r<br>Variants:<br>VaAres1_B_FDSW210055061-2r<br>Variants:<br>VaAres1_B_FDSW210055061-2r<br>Variants:<br>VaAres1_B_FDSW210055061-2r<br>Variants:<br>VaAres1_B_FDSW210055061-2r | GTTTAA    | 4043 | 4048 | 6  | ACCGTT -> GTTTAA     | 13 -> 17   | Substitution       | 100.00%        | 2.00E-25 |          |                          |                      |              |            |
| Variants:<br>VaAres1_B_FDSW210055061-2r<br>Variants:<br>VaAres1_B_FDSW210055061-2r<br>Variants:<br>VaAres1_B_FDSW210055061-2r<br>Variants:<br>VaAres1_B_FDSW210055061-2r<br>Variants:<br>VaAres1_B_FDSW210055061-2r | GTGGTA    | 4050 | 4055 | 6  | CGCTGC -> GTGGTA     | 7 -> 10    | Substitution       | 100.00%        | 7.90E-17 |          |                          |                      |              |            |
| Variants:<br>VaAres1_B_FDSW210055061-2r<br>Variants:<br>VaAres1_B_FDSW210055061-2r<br>Variants:<br>VaAres1_B_FDSW210055061-2r<br>Variants:<br>VaAres1_B_FDSW210055061-2r<br>Variants:<br>VaAres1_B_FDSW210055061-2r | G         | 4059 | 4059 | 1  | T -> G               | 5          | SNP (transversion) | 100.00%        | 3.20E-12 |          |                          |                      |              |            |
| Variants:<br>VaAres1_B_FDSW210055061-2r<br>Variants:<br>VaAres1_B_FDSW210055061-2r<br>Variants:<br>VaAres1_B_FDSW210055061-2r<br>Variants:<br>VaAres1_B_FDSW210055061-2r<br>Variants:<br>VaAres1_B_FDSW210055061-2r | G         | 4339 | 4339 | 1  | T -> G               | 4          | SNP (transversion) | 100.00%        | 4.00E-07 | K -> T   | hypothetical protein CDS | hypothetical protein | Substitution | KLI69882.1 |
| Variants:<br>VaAres1_B_FDSW210055061-2r<br>Variants:<br>VaAres1_B_FDSW210055061-2r<br>Variants:<br>VaAres1_B_FDSW210055061-2r<br>Variants:<br>VaAres1_B_FDSW210055061-2r<br>Variants:<br>VaAres1_B_FDSW210055061-2r | G         | 4342 | 4342 | 1  | T -> G               | 24         | SNP (transversion) | 95.80%         | 1.20E-47 | D -> A   | hypothetical protein CDS | hypothetical protein | Substitution | KLI69882.1 |
| Variants:<br>VaAres1_B_FDSW210055061-2r<br>Variants:<br>VaAres1_B_FDSW210055061-2r<br>Variants:<br>VaAres1_B_FDSW210055061-2r<br>Variants:<br>VaAres1_B_FDSW210055061-2r<br>Variants:<br>VaAres1_B_FDSW210055061-2r | ACCACTTTG | 4369 | 4375 | >6 | TGGCCGA -> ACCACTTTG | 192 -> 259 | Insertion          | 87.3% -> 97.5% | 0        |          | hypothetical protein CDS | hypothetical protein | Truncation   | KLI69882.1 |
| Variants:<br>VaAres1_B_FDSW210055061-2r<br>Variants:<br>VaAres1_B_FDSW210055061-2r<br>Variants:<br>VaAres1_B_FDSW210055061-2r<br>Variants:<br>VaAres1_B_FDSW210055061-2r<br>Variants:<br>VaAres1_B_FDSW210055061-2r | T         | 4379 | 4379 | 1  | C -> T               | 289        | SNP (transition)   | 99.70%         | 0        | A -> T   | hypothetical protein CDS | hypothetical protein | Substitution | KLI69882.1 |
| Variants:<br>VaAres1_B_FDSW210055061-2r<br>Variants:<br>VaAres1_B_FDSW210055061-2r<br>Variants:<br>VaAres1_B_FDSW210055061-2r<br>Variants:<br>VaAres1_B_FDSW210055061-2r<br>Variants:<br>VaAres1_B_FDSW210055061-2r | CATGA     | 4381 | 4385 | 5  | TGGTG -> CATGA       | 299 -> 313 | Substitution       | 99.70%         | 0        |          | hypothetical protein CDS | hypothetical protein | Truncation   | KLI69882.1 |
| Variants:<br>VaAres1_B_FDSW210055061-2r<br>Variants:<br>VaAres1_B_FDSW210055061-2r<br>Variants:<br>VaAres1_B_FDSW210055061-2r<br>Variants:<br>VaAres1_B_FDSW210055061-2r<br>Variants:<br>VaAres1_B_FDSW210055061-2r | GG        | 4388 | 4389 | 2  | CA -> GG             | 324 -> 335 | Substitution       | 99.40%         | 0        | PE -> PQ | hypothetical protein CDS | hypothetical protein | Substitution | KLI69882.1 |
| Variants:<br>VaAres1_B_FDSW210055061-2r<br>Variants:<br>VaAres1_B_FDSW210055061-2r<br>Variants:<br>VaAres1_B_FDSW210055061-2r<br>Variants:<br>VaAres1_B_FDSW210055061-2r<br>Variants:<br>VaAres1_B_FDSW210055061-2r | TGA       | 4392 | 4394 | 2  | CGT -> TGA           | 369 -> 380 | Substitution       | 100.00%        | 0        | T -> S   | hypothetical protein CDS | hypothetical protein | Substitution | KLI69882.1 |
| Variants:<br>VaAres1_B_FDSW210055061-2r<br>Variants:<br>VaAres1_B_FDSW210055061-2r<br>Variants:<br>VaAres1_B_FDSW210055061-2r<br>Variants:<br>VaAres1_B_FDSW210055061-2r<br>Variants:<br>VaAres1_B_FDSW210055061-2r | GT        | 4396 | 4397 | 2  | AA -> GT             | 390 -> 393 | Substitution       | 99.70%         | 0        | F -> T   | hypothetical protein CDS | hypothetical protein | Substitution | KLI69882.1 |
| Variants:<br>VaAres1_B_FDSW210055061-2r<br>Variants:<br>VaAres1_B_FDSW210055061-2r<br>Variants:<br>VaAres1_B_FDSW210055061-2r<br>Variants:<br>VaAres1_B_FDSW210055061-2r<br>Variants:<br>VaAres1_B_FDSW210055061-2r | A         | 4401 | 4401 | 1  | C -> A               | 419        | SNP (transversion) | 99.80%         | 0        | M -> V   | hypothetical protein CDS | hypothetical protein | Substitution | KLI69882.1 |
| Variants:<br>VaAres1_B_FDSW210055061-2r<br>Variants:<br>VaAres1_B_FDSW210055061-2r<br>Variants:<br>VaAres1_B_FDSW210055061-2r<br>Variants:<br>VaAres1_B_FDSW210055061-2r<br>Variants:<br>VaAres1_B_FDSW210055061-2r | A         | 4404 | 4406 | 3  | GTT -> A             | 461        | Deletion           | 99.60%         | 0        |          |                          |                      |              |            |
| Variants:<br>VaAres1_B_FDSW210055061-2r<br>Variants:<br>VaAres1_B_FDSW210055061-2r<br>Variants:<br>VaAres1_B_FDSW210055061-2r<br>Variants:<br>VaAres1_B_FDSW210055061-2r<br>Variants:<br>VaAres1_B_FDSW210055061-2r | GT        | 4409 | 4410 | 2  | TC -> GT             | 508 -> 517 | Substitution       | 99.60%         | 0        |          |                          |                      |              |            |
| Variants:<br>VaAres1_B_FDSW210055061-2r<br>Variants:<br>VaAres1_B_FDSW210055061-2r<br>Variants:<br>VaAres1_B_FDSW210055061-2r<br>Variants:<br>VaAres1_B_FDSW210055061-2r<br>Variants:<br>VaAres1_B_FDSW210055061-2r | GC        | 4414 | 4415 | 2  | CT -> GC             | 543 -> 550 | Substitution       | 99.80%         | 0        |          |                          |                      |              |            |

|                                         |    |      |      |   |              |            |                           |                |           |
|-----------------------------------------|----|------|------|---|--------------|------------|---------------------------|----------------|-----------|
| Variants:<br>VaAres1_B_FDSW210055061-2r | A  | 4417 | 4417 | 1 | G -> A       | 568        | SNP (transition)          | 99.60%         | 0         |
| Variants:<br>VaAres1_B_FDSW210055061-2r | GG | 4419 | 4420 | 2 | CA -> GG     | 663 -> 675 | Substitution              | 99.4% -> 99.5% | 0         |
| Variants:<br>VaAres1_B_FDSW210055061-2r | AC | 4423 | 4424 | 2 | GA -> AC     | 700 -> 705 | Substitution              | 99.40%         | 0         |
| Variants:<br>VaAres1_B_FDSW210055061-2r | G  | 4427 | 4426 | 0 | #NAME?       | 729        | Insertion                 | 99.90%         | 0         |
| Variants:<br>VaAres1_B_FDSW210055061-2r | TG | 4431 | 4432 | 2 | GA -> TG     | 757 -> 762 | Substitution              | 99.70%         | 0         |
| Variants:<br>VaAres1_B_FDSW210055061-2r | A  | 4434 | 4433 | 0 | #NAME?       | 797        | Insertion                 | 99.90%         | 0         |
| Variants:<br>VaAres1_B_FDSW210055061-2r | CA | 4435 | 4436 | 2 | GT -> CA     | 810 -> 821 | Substitution              | 99.80%         | 0         |
| Variants:<br>VaAres1_B_FDSW210055061-2r | A  | 4973 | 4973 | 1 | G -> A       | 154        | SNP (transition)          | 66.90%         | 0.00E+00  |
| Variants:<br>VaAres1_B_FDSW210055061-2r | C  | 4975 | 4974 | 0 | +C           | 149        | Insertion                 | 74.50%         | 0.00E+00  |
| Variants:<br>VaAres1_B_FDSW210055061-2r | G  | 4975 | 4974 | 0 | #NAME?       | 146        | Insertion                 | 46.60%         | 1.60E-182 |
| Variants:<br>VaAres1_B_FDSW210055061-2r | T  | 4975 | 4974 | 0 | (T)3 -> (T)4 | 146        | Insertion (tandem repeat) | 30.10%         | 1.00E-90  |
| Variants:<br>VaAres1_B_FDSW210055061-2r | AA | 4975 | 4976 | 2 | TT -> AA     | 140 -> 143 | Substitution              | 44.1% -> 44.3% | 9.10E-165 |
| Variants:<br>VaAres1_B_FDSW210055061-2r | G  | 4978 | 4978 | 1 | A -> G       | 138        | SNP (transition)          | 42.00%         | 9.80E-147 |
| Variants:<br>VaAres1_B_FDSW210055061-2r | A  | 4979 | 4979 | 1 | G -> A       | 139        | SNP (transition)          | 64.00%         | 3.70E-256 |
| Variants:<br>VaAres1_B_FDSW210055061-2r | T  | 4980 | 4980 | 1 | A -> T       | 138        | SNP (transversion)        | 42.00%         | 1.60E-152 |
| Variants:<br>VaAres1_B_FDSW210055061-2r | A  | 4981 | 4981 | 1 | G -> A       | 131        | SNP (transition)          | 61.80%         | 2.90E-223 |
| Variants:<br>VaAres1_B_FDSW210055061-2r | C  | 4981 | 4981 | 1 | G -> C       | 131        | SNP (transversion)        | 26.70%         | 7.50E-74  |
| Variants:<br>VaAres1_B_FDSW210055061-2r | A  | 4982 | 4982 | 1 | T -> A       | 130        | SNP (transversion)        | 73.80%         | 5.40E-267 |
| Variants:<br>VaAres1_B_FDSW210055061-2r | A  | 4983 | 4983 | 1 | G -> A       | 119        | SNP (transition)          | 84.00%         | 4.80E-289 |
| Variants:<br>VaAres1_B_FDSW210055061-2r | C  | 4984 | 4984 | 1 | A -> C       | 119        | SNP (transversion)        | 43.70%         | 7.20E-133 |
| Variants:<br>VaAres1_B_FDSW210055061-2r | A  | 4985 | 4985 | 1 | T -> A       | 114        | SNP (transversion)        | 61.40%         | 7.70E-186 |
| Variants:<br>VaAres1_B_FDSW210055061-2r | A  | 4986 | 4986 | 1 | T -> A       | 114        | SNP (transversion)        | 28.10%         | 1.90E-68  |

|                                         |    |      |      |   |          |            |                    |                |           |
|-----------------------------------------|----|------|------|---|----------|------------|--------------------|----------------|-----------|
| Variants:<br>VaAres1_B_FDSW210055061-2r | C  | 4986 | 4986 | 1 | T -> C   | 114        | SNP (transition)   | 57.90%         | 2.30E-179 |
| Variants:<br>VaAres1_B_FDSW210055061-2r | A  | 4988 | 4988 | 1 | G -> A   | 112        | SNP (transition)   | 48.20%         | 2.20E-146 |
| Variants:<br>VaAres1_B_FDSW210055061-2r | C  | 4988 | 4988 | 1 | G -> C   | 112        | SNP (transversion) | 37.50%         | 1.10E-95  |
| Variants:<br>VaAres1_B_FDSW210055061-2r | A  | 4989 | 4989 | 1 | C -> A   | 108        | SNP (transversion) | 67.60%         | 5.50E-184 |
| Variants:<br>VaAres1_B_FDSW210055061-2r | AA | 4992 | 4993 | 2 | CG -> AA | 102 -> 103 | Substitution       | 80.4% -> 82.5% | 5.20E-234 |
| Variants:<br>VaAres1_B_FDSW210055061-2r | A  | 4994 | 4994 | 1 | C -> A   | 102        | SNP (transversion) | 43.10%         | 3.60E-99  |
| Variants:<br>VaAres1_B_FDSW210055061-2r | A  | 4995 | 4995 | 1 | G -> A   | 93         | SNP (transition)   | 51.60%         | 3.00E-132 |
| Variants:<br>VaAres1_B_FDSW210055061-2r | C  | 4995 | 4995 | 1 | G -> C   | 93         | SNP (transversion) | 26.90%         | 2.70E-48  |
| Variants:<br>VaAres1_B_FDSW210055061-2r | A  | 4996 | 4996 | 1 | T -> A   | 92         | SNP (transversion) | 30.40%         | 7.10E-53  |
| Variants:<br>VaAres1_B_FDSW210055061-2r | C  | 4996 | 4996 | 1 | T -> C   | 92         | SNP (transition)   | 47.80%         | 5.80E-115 |
| Variants:<br>VaAres1_B_FDSW210055061-2r | A  | 4997 | 4997 | 1 | G -> A   | 88         | SNP (transition)   | 46.60%         | 1.30E-106 |
| Variants:<br>VaAres1_B_FDSW210055061-2r | C  | 4997 | 4997 | 1 | G -> C   | 88         | SNP (transversion) | 30.70%         | 7.70E-54  |
| Variants:<br>VaAres1_B_FDSW210055061-2r | A  | 4998 | 4998 | 1 | G -> A   | 85         | SNP (transition)   | 29.40%         | 2.00E-49  |
| Variants:<br>VaAres1_B_FDSW210055061-2r | T  | 4998 | 4998 | 1 | G -> T   | 85         | SNP (transversion) | 36.50%         | 2.20E-64  |
| Variants:<br>VaAres1_B_FDSW210055061-2r | T  | 4999 | 4999 | 1 | C -> T   | 84         | SNP (transition)   | 58.30%         | 1.90E-104 |
| Variants:<br>VaAres1_B_FDSW210055061-2r | C  | 5000 | 5000 | 1 | A -> C   | 82         | SNP (transversion) | 34.10%         | 6.40E-63  |
| Variants:<br>VaAres1_B_FDSW210055061-2r | T  | 5000 | 5000 | 1 | A -> T   | 82         | SNP (transversion) | 32.90%         | 1.90E-49  |
| Variants:<br>VaAres1_B_FDSW210055061-2r | A  | 5001 | 5001 | 1 | T -> A   | 73         | SNP (transversion) | 34.20%         | 2.20E-51  |
| Variants:<br>VaAres1_B_FDSW210055061-2r | A  | 5002 | 5002 | 1 | T -> A   | 69         | SNP (transversion) | 50.70%         | 4.90E-65  |
| Variants:<br>VaAres1_B_FDSW210055061-2r | A  | 5003 | 5003 | 1 | T -> A   | 61         | SNP (transversion) | 29.50%         | 7.00E-29  |
| Variants:<br>VaAres1_B_FDSW210055061-2r | G  | 5004 | 5004 | 1 | T -> G   | 59         | SNP (transversion) | 25.40%         | 1.00E-21  |
| Variants:<br>VaAres1_B_FDSW210055061-2r | G  | 5005 | 5005 | 1 | T -> G   | 58         | SNP (transversion) | 27.60%         | 4.70E-30  |

|                            |     |      |      |   |            |          |                    |                 |           |
|----------------------------|-----|------|------|---|------------|----------|--------------------|-----------------|-----------|
| Variants:                  |     |      |      |   |            |          |                    |                 |           |
| VaAres1_B_FDSW210055061-2r | G   | 5006 | 5006 | 1 | A -> G     | 58       | SNP (transition)   | 31.00%          | 4.00E-31  |
| Variants:                  |     |      |      |   |            |          |                    |                 |           |
| VaAres1_B_FDSW210055061-2r | T   | 5006 | 5006 | 1 | A -> T     | 58       | SNP (transversion) | 29.30%          | 5.50E-29  |
| Variants:                  |     |      |      |   |            |          |                    |                 |           |
| VaAres1_B_FDSW210055061-2r | T   | 5007 | 5007 | 1 | C -> T     | 57       | SNP (transition)   | 49.10%          | 3.20E-46  |
| Variants:                  |     |      |      |   |            |          |                    |                 |           |
| VaAres1_B_FDSW210055061-2r | C   | 5009 | 5009 | 1 | A -> C     | 43       | SNP (transversion) | 34.90%          | 4.20E-24  |
| Variants:                  |     |      |      |   |            |          |                    |                 |           |
| VaAres1_B_FDSW210055061-2r | T   | 5011 | 5011 | 1 | G -> T     | 40       | SNP (transversion) | 40.00%          | 8.90E-27  |
| Variants:                  |     |      |      |   |            |          |                    |                 |           |
| VaAres1_B_FDSW210055061-2r | G   | 5012 | 5012 | 1 | C -> G     | 39       | SNP (transversion) | 28.20%          | 7.40E-17  |
| Variants:                  |     |      |      |   |            |          |                    |                 |           |
| VaAres1_B_FDSW210055061-2r | C   | 5014 | 5014 | 1 | T -> C     | 35       | SNP (transition)   | 28.60%          | 1.70E-16  |
| Variants:                  |     |      |      |   |            |          |                    |                 |           |
| VaAres1_B_FDSW210055061-2r | T   | 5016 | 5016 | 1 | G -> T     | 36       | SNP (transversion) | 25.00%          | 3.50E-16  |
| Variants:                  |     |      |      |   |            |          |                    |                 |           |
| VaAres1_B_FDSW210055061-2r | C   | 5579 | 5579 | 1 | G -> C     | 42       | SNP (transversion) | 97.60%          | 2.10E-134 |
| Variants:                  |     |      |      |   |            |          |                    |                 |           |
| VaAres1_B_FDSW210055061-2r | T   | 5581 | 5581 | 1 | A -> T     | 42       | SNP (transversion) | 100.00%         | 6.30E-131 |
| Variants:                  |     |      |      |   |            |          |                    |                 |           |
| VaAres1_B_FDSW210055061-2r | CG  | 5583 | 5584 | 2 | TA -> CG   | 39 -> 40 | Substitution       | 100.00%         | 1.60E-125 |
| Variants:                  |     |      |      |   |            |          |                    |                 |           |
| VaAres1_B_FDSW210055061-2r | TT  | 5609 | 5610 | 2 | AA -> TT   | 32 -> 35 | Substitution       | 25.0% -> 31.4%  | 1.00E-17  |
| Variants:                  |     |      |      |   |            |          |                    |                 |           |
| VaAres1_B_FDSW210055061-2r | AA  | 5612 | 5613 | 2 | GC -> AA   | 38 -> 39 | Substitution       | 39.5% -> 41.0%  | 4.90E-43  |
| Variants:                  |     |      |      |   |            |          |                    |                 |           |
| VaAres1_B_FDSW210055061-2r | GGG | 5615 | 5617 | 3 | TTA -> GGG | 43 -> 46 | Substitution       | 53.5% -> 56.5%  | 6.00E-67  |
| Variants:                  |     |      |      |   |            |          |                    |                 |           |
| VaAres1_B_FDSW210055061-2r | A   | 5618 | 5618 | 1 | G -> A     | 46       | SNP (transition)   | 56.50%          | 2.20E-76  |
| Variants:                  |     |      |      |   |            |          |                    |                 |           |
| VaAres1_B_FDSW210055061-2r | T   | 5618 | 5618 | 1 | G -> T     | 46       | SNP (transversion) | 43.50%          | 5.40E-46  |
| Variants:                  |     |      |      |   |            |          |                    |                 |           |
| VaAres1_B_FDSW210055061-2r | GT  | 5619 | 5620 | 2 | TC -> GT   | 47       | Substitution       | 95.7% -> 100.0% | 3.40E-146 |
| Variants:                  |     |      |      |   |            |          |                    |                 |           |
| VaAres1_B_FDSW210055061-2r | C   | 5621 | 5621 | 1 | G -> C     | 45       | SNP (transversion) | 66.70%          | 3.40E-85  |
| Variants:                  |     |      |      |   |            |          |                    |                 |           |
| VaAres1_B_FDSW210055061-2r | T   | 5622 | 5622 | 1 | C -> T     | 44       | SNP (transition)   | 93.20%          | 1.00E-123 |
| Variants:                  |     |      |      |   |            |          |                    |                 |           |
| VaAres1_B_FDSW210055061-2r | G   | 5623 | 5623 | 1 | C -> G     | 43       | SNP (transversion) | 67.40%          | 1.60E-85  |
| Variants:                  |     |      |      |   |            |          |                    |                 |           |
| VaAres1_B_FDSW210055061-2r | AA  | 5624 | 5625 | 2 | TT -> AA   | 45 -> 46 | Substitution       | 91.1% -> 91.3%  | 1.20E-122 |
| Variants:                  |     |      |      |   |            |          |                    |                 |           |
| VaAres1_B_FDSW210055061-2r | A   | 5626 | 5626 | 1 | G -> A     | 47       | SNP (transition)   | 70.20%          | 8.50E-95  |



|                                         |      |      |      |   |              |           |                                       |                |           |
|-----------------------------------------|------|------|------|---|--------------|-----------|---------------------------------------|----------------|-----------|
| Variants:<br>VaAres1_B_FDSW210055061-2r | T    | 5631 | 5631 | 1 | G -> T       | 56        | SNP (transversion)                    | 25.00%         | 1.70E-17  |
| Variants:<br>VaAres1_B_FDSW210055061-2r | T    | 5632 | 5632 | 1 | A -> T       | 54        | SNP (transversion)                    | 90.70%         | 1.60E-126 |
| Variants:<br>VaAres1_B_FDSW210055061-2r | TATG | 5633 | 5636 | 4 | ATCA -> TATG | 50 -> 53  | Substitution                          | 71.7% -> 76.0% | 7.50E-100 |
| Variants:<br>VaAres1_B_FDSW210055061-2r | A    | 5637 | 5637 | 1 | T -> A       | 56        | SNP (transversion)                    | 83.90%         | 9.40E-118 |
| Variants:<br>VaAres1_B_FDSW210055061-2r | A    | 5638 | 5638 | 1 | T -> A       | 57        | SNP (transversion)                    | 71.90%         | 7.10E-106 |
| Variants:<br>VaAres1_B_FDSW210055061-2r | AG   | 5645 | 5646 | 2 | TC -> AG     | 63 -> 65  | Substitution Deletion (tandem repeat) | 72.3% -> 74.6% | 1.20E-124 |
| Variants: VaAres1_B_FDSW210055061-2r    |      | 5648 | 5648 | 1 | (C)3 -> (C)2 | 71        |                                       | 67.60%         | 6.70E-50  |
| Variants:<br>VaAres1_B_FDSW210055061-2r | T    | 5653 | 5653 | 1 | G -> T       | 104       | SNP (transversion)                    | 57.70%         | 4.30E-139 |
| Variants:<br>VaAres1_B_FDSW210055061-2r | GC   | 5658 | 5657 | 0 | #NAME?       | 132       | Insertion                             | 45.50%         | 2.00E-130 |
| Variants:<br>VaAres1_C_FDSW210055062-1r | TGGT | 79   | 82   | 4 | CCTG -> TGGT | 94 -> 108 | Substitution                          | 85.1% -> 88.0% | 6.80E-236 |
| Variants:<br>VaAres1_C_FDSW210055062-1r | G    | 84   | 84   | 1 | A -> G       | 90        | SNP (transition)                      | 96.70%         | 1.20E-256 |
| Variants:<br>VaAres1_C_FDSW210055062-1r | GGGG | 86   | 89   | 4 | CATC -> GGGG | 82 -> 85  | Substitution                          | 70.2% -> 84.7% | 1.20E-150 |
| Variants:<br>VaAres1_C_FDSW210055062-1r | C    | 91   | 91   | 1 | T -> C       | 82        | SNP (transition)                      | 68.30%         | 1.60E-147 |
| Variants:<br>VaAres1_C_FDSW210055062-1r | GGA  | 93   | 95   | 3 | CAC -> GGA   | 82 -> 91  | Substitution                          | 56.0% -> 65.5% | 2.50E-107 |
| Variants:<br>VaAres1_C_FDSW210055062-1r | T    | 97   | 97   | 1 | A -> T       | 87        | SNP (transversion)                    | 46.00%         | 9.30E-88  |
| Variants:<br>VaAres1_C_FDSW210055062-1r | GAA  | 99   | 101  | 3 | CGT -> GAA   | 82 -> 86  | Substitution                          | 29.3% -> 33.7% | 4.60E-45  |
| Variants:<br>VaAres1_C_FDSW210055062-1r | C    | 102  | 102  | 1 | T -> C       | 86        | SNP (transition)                      | 39.50%         | 2.10E-58  |
| Variants:<br>VaAres1_C_FDSW210055062-1r | C    | 103  | 103  | 1 | G -> C       | 90        | SNP (transversion)                    | 25.60%         | 1.10E-41  |
| Variants:<br>VaAres1_C_FDSW210055062-1r | T    | 126  | 126  | 1 | C -> T       | 203       | SNP (transition)                      | 32.50%         | 9.90E-60  |
| Variants:<br>VaAres1_C_FDSW210055062-1r | T    | 129  | 129  | 1 | C -> T       | 222       | SNP (transition)                      | 67.60%         | 1.60E-241 |
| Variants:<br>VaAres1_C_FDSW210055062-1r | G    | 132  | 132  | 1 | C -> G       | 235       | SNP (transversion)                    | 41.70%         | 2.30E-158 |
| Variants:<br>VaAres1_C_FDSW210055062-1r | T    | 144  | 144  | 1 | C -> T       | 295       | SNP (transition)                      | 34.60%         | 2.70E-134 |

|                            |   |     |     |   |        |      |                    |        |           |
|----------------------------|---|-----|-----|---|--------|------|--------------------|--------|-----------|
| Variants:                  |   |     |     |   |        |      |                    |        |           |
| VaAres1_C_FDSW210055062-1r | G | 150 | 150 | 1 | C -> G | 330  | SNP (transversion) | 25.50% | 4.70E-131 |
| Variants:                  |   |     |     |   |        |      |                    |        |           |
| VaAres1_C_FDSW210055062-1r | G | 153 | 153 | 1 | A -> G | 348  | SNP (transition)   | 29.30% | 2.10E-196 |
| Variants:                  |   |     |     |   |        |      |                    |        |           |
| VaAres1_C_FDSW210055062-1r | A | 159 | 159 | 1 | G -> A | 393  | SNP (transition)   | 72.50% | 0         |
| Variants:                  |   |     |     |   |        |      |                    |        |           |
| VaAres1_C_FDSW210055062-1r | A | 165 | 165 | 1 | T -> A | 438  | SNP (transversion) | 36.80% | 6.60E-280 |
| Variants:                  |   |     |     |   |        |      |                    |        |           |
| VaAres1_C_FDSW210055062-1r | A | 183 | 183 | 1 | G -> A | 524  | SNP (transition)   | 34.00% | 8.40E-302 |
| Variants:                  |   |     |     |   |        |      |                    |        |           |
| VaAres1_C_FDSW210055062-1r | A | 192 | 192 | 1 | G -> A | 567  | SNP (transition)   | 35.10% | 0         |
| Variants:                  |   |     |     |   |        |      |                    |        |           |
| VaAres1_C_FDSW210055062-1r | A | 201 | 201 | 1 | G -> A | 623  | SNP (transition)   | 33.40% | 0         |
| Variants:                  |   |     |     |   |        |      |                    |        |           |
| VaAres1_C_FDSW210055062-1r | G | 216 | 216 | 1 | A -> G | 698  | SNP (transition)   | 35.00% | 0         |
| Variants:                  |   |     |     |   |        |      |                    |        |           |
| VaAres1_C_FDSW210055062-1r | C | 225 | 225 | 1 | A -> C | 737  | SNP (transversion) | 30.90% | 0         |
| Variants:                  |   |     |     |   |        |      |                    |        |           |
| VaAres1_C_FDSW210055062-1r | T | 225 | 225 | 1 | A -> T | 737  | SNP (transversion) | 32.30% | 0         |
| Variants:                  |   |     |     |   |        |      |                    |        |           |
| VaAres1_C_FDSW210055062-1r | T | 227 | 227 | 1 | C -> T | 743  | SNP (transition)   | 26.00% | 0         |
| Variants:                  |   |     |     |   |        |      |                    |        |           |
| VaAres1_C_FDSW210055062-1r | C | 240 | 240 | 1 | T -> C | 771  | SNP (transition)   | 34.60% | 0         |
| Variants:                  |   |     |     |   |        |      |                    |        |           |
| VaAres1_C_FDSW210055062-1r | A | 294 | 294 | 1 | G -> A | 779  | SNP (transition)   | 48.40% | 0         |
| Variants:                  |   |     |     |   |        |      |                    |        |           |
| VaAres1_C_FDSW210055062-1r | A | 303 | 303 | 1 | T -> A | 804  | SNP (transversion) | 31.00% | 0         |
| Variants:                  |   |     |     |   |        |      |                    |        |           |
| VaAres1_C_FDSW210055062-1r | G | 306 | 306 | 1 | A -> G | 811  | SNP (transition)   | 29.50% | 0         |
| Variants:                  |   |     |     |   |        |      |                    |        |           |
| VaAres1_C_FDSW210055062-1r | A | 315 | 315 | 1 | G -> A | 820  | SNP (transition)   | 25.20% | 0         |
| Variants:                  |   |     |     |   |        |      |                    |        |           |
| VaAres1_C_FDSW210055062-1r | A | 357 | 357 | 1 | G -> A | 1035 | SNP (transition)   | 48.20% | 0         |
| Variants:                  |   |     |     |   |        |      |                    |        |           |
| VaAres1_C_FDSW210055062-1r | G | 363 | 363 | 1 | A -> G | 1048 | SNP (transition)   | 49.80% | 0         |
| Variants:                  |   |     |     |   |        |      |                    |        |           |
| VaAres1_C_FDSW210055062-1r | C | 369 | 369 | 1 | T -> C | 1055 | SNP (transition)   | 81.80% | 0         |
| Variants:                  |   |     |     |   |        |      |                    |        |           |
| VaAres1_C_FDSW210055062-1r | A | 371 | 371 | 1 | G -> A | 1060 | SNP (transition)   | 50.70% | 0         |
| Variants:                  |   |     |     |   |        |      |                    |        |           |
| VaAres1_C_FDSW210055062-1r | G | 387 | 387 | 1 | C -> G | 1168 | SNP (transversion) | 56.30% | 0         |
| Variants:                  |   |     |     |   |        |      |                    |        |           |
| VaAres1_C_FDSW210055062-1r | C | 393 | 393 | 1 | G -> C | 1192 | SNP (transversion) | 50.40% | 0         |

|                            |   |     |     |   |        |      |                    |        |   |
|----------------------------|---|-----|-----|---|--------|------|--------------------|--------|---|
| Variants:                  |   |     |     |   |        |      |                    |        |   |
| VaAres1_C_FDSW210055062-1r | C | 396 | 396 | 1 | A -> C | 1208 | SNP (transversion) | 32.30% | 0 |
| Variants:                  |   |     |     |   |        |      |                    |        |   |
| VaAres1_C_FDSW210055062-1r | G | 420 | 420 | 1 | A -> G | 1328 | SNP (transition)   | 29.90% | 0 |
| Variants:                  |   |     |     |   |        |      |                    |        |   |
| VaAres1_C_FDSW210055062-1r | T | 420 | 420 | 1 | A -> T | 1328 | SNP (transversion) | 36.20% | 0 |
| Variants:                  |   |     |     |   |        |      |                    |        |   |
| VaAres1_C_FDSW210055062-1r | A | 422 | 422 | 1 | T -> A | 1337 | SNP (transversion) | 36.30% | 0 |
| Variants:                  |   |     |     |   |        |      |                    |        |   |
| VaAres1_C_FDSW210055062-1r | A | 423 | 423 | 1 | G -> A | 1345 | SNP (transition)   | 65.10% | 0 |
| Variants:                  |   |     |     |   |        |      |                    |        |   |
| VaAres1_C_FDSW210055062-1r | A | 426 | 426 | 1 | G -> A | 1350 | SNP (transition)   | 64.20% | 0 |
| Variants:                  |   |     |     |   |        |      |                    |        |   |
| VaAres1_C_FDSW210055062-1r | G | 438 | 438 | 1 | A -> G | 1396 | SNP (transition)   | 48.50% | 0 |
| Variants:                  |   |     |     |   |        |      |                    |        |   |
| VaAres1_C_FDSW210055062-1r | A | 456 | 456 | 1 | G -> A | 1334 | SNP (transition)   | 46.60% | 0 |
| Variants:                  |   |     |     |   |        |      |                    |        |   |
| VaAres1_C_FDSW210055062-1r | G | 469 | 469 | 1 | C -> G | 1293 | SNP (transversion) | 26.00% | 0 |
| Variants:                  |   |     |     |   |        |      |                    |        |   |
| VaAres1_C_FDSW210055062-1r | C | 489 | 489 | 1 | T -> C | 1226 | SNP (transition)   | 43.60% | 0 |
| Variants:                  |   |     |     |   |        |      |                    |        |   |
| VaAres1_C_FDSW210055062-1r | C | 498 | 498 | 1 | G -> C | 1209 | SNP (transversion) | 29.40% | 0 |
| Variants:                  |   |     |     |   |        |      |                    |        |   |
| VaAres1_C_FDSW210055062-1r | C | 513 | 513 | 1 | T -> C | 1179 | SNP (transition)   | 51.00% | 0 |
| Variants:                  |   |     |     |   |        |      |                    |        |   |
| VaAres1_C_FDSW210055062-1r | C | 516 | 516 | 1 | T -> C | 1187 | SNP (transition)   | 34.00% | 0 |
| Variants:                  |   |     |     |   |        |      |                    |        |   |
| VaAres1_C_FDSW210055062-1r | T | 531 | 531 | 1 | C -> T | 1166 | SNP (transition)   | 28.80% | 0 |
| Variants:                  |   |     |     |   |        |      |                    |        |   |
| VaAres1_C_FDSW210055062-1r | C | 537 | 537 | 1 | G -> C | 1156 | SNP (transversion) | 56.40% | 0 |
| Variants:                  |   |     |     |   |        |      |                    |        |   |
| VaAres1_C_FDSW210055062-1r | G | 540 | 540 | 1 | A -> G | 1149 | SNP (transition)   | 35.20% | 0 |
| Variants:                  |   |     |     |   |        |      |                    |        |   |
| VaAres1_C_FDSW210055062-1r | A | 552 | 552 | 1 | T -> A | 1126 | SNP (transversion) | 38.00% | 0 |
| Variants:                  |   |     |     |   |        |      |                    |        |   |
| VaAres1_C_FDSW210055062-1r | A | 564 | 564 | 1 | C -> A | 1091 | SNP (transversion) | 29.30% | 0 |
| Variants:                  |   |     |     |   |        |      |                    |        |   |
| VaAres1_C_FDSW210055062-1r | G | 588 | 588 | 1 | A -> G | 981  | SNP (transition)   | 36.30% | 0 |
| Variants:                  |   |     |     |   |        |      |                    |        |   |
| VaAres1_C_FDSW210055062-1r | C | 663 | 663 | 1 | T -> C | 629  | SNP (transition)   | 73.40% | 0 |
| Variants:                  |   |     |     |   |        |      |                    |        |   |
| VaAres1_C_FDSW210055062-1r | G | 677 | 677 | 1 | A -> G | 493  | SNP (transition)   | 77.30% | 0 |
| Variants:                  |   |     |     |   |        |      |                    |        |   |
| VaAres1_C_FDSW210055062-1r | C | 684 | 684 | 1 | T -> C | 447  | SNP (transition)   | 71.60% | 0 |

|                                              |         |     |     |   |                    |               |              |                       |        |  |           |        |                             |                          |                  |                |  |  |
|----------------------------------------------|---------|-----|-----|---|--------------------|---------------|--------------|-----------------------|--------|--|-----------|--------|-----------------------------|--------------------------|------------------|----------------|--|--|
| Variants:<br>VaAres1_C_FDSW210055062-<br>l-r | A       | 687 | 687 | 1 | G -> A             |               | 422          | SNP<br>(transition)   | 72.30% |  | 0         |        |                             |                          |                  |                |  |  |
| Variants:<br>VaAres1_C_FDSW210055062-<br>l-r | T       | 690 | 690 | 1 | A -> T             |               | 408          | SNP<br>(transversion) | 77.00% |  | 0         |        |                             |                          |                  |                |  |  |
| Variants:<br>VaAres1_C_FDSW210055062-<br>l-r | A       | 693 | 693 | 1 | G -> A             |               | 389          | SNP<br>(transition)   | 77.60% |  | 0         |        |                             |                          |                  |                |  |  |
| Variants:<br>VaAres1_C_FDSW210055062-<br>l-r | A       | 708 | 708 | 1 | G -> A             |               | 306          | SNP<br>(transition)   | 78.80% |  | 0         |        |                             |                          |                  |                |  |  |
| Variants:<br>VaAres1_C_FDSW210055062-<br>l-r | T       | 723 | 723 | 1 | C -> T             |               | 234          | SNP<br>(transition)   | 79.90% |  | 0         |        |                             |                          |                  |                |  |  |
| Variants:<br>VaAres1_C_FDSW210055062-<br>l-r | C       | 726 | 726 | 1 | T -> C             |               | 223          | SNP<br>(transition)   | 78.90% |  | 0         |        |                             |                          |                  |                |  |  |
| Variants:<br>VaAres1_C_FDSW210055062-<br>l-r | C       | 747 | 747 | 1 | T -> C             |               | 143          | SNP<br>(transition)   | 79.00% |  | 0.00E+00  |        |                             |                          |                  |                |  |  |
| Variants:<br>VaAres1_C_FDSW210055062-<br>l-r | CGTTCGA | 749 | 755 | 7 | TACCTTG -> CGTTCGA | 121 -><br>137 | Substitution | 41.3% -><br>67.6%     |        |  | 5.30E-126 |        |                             |                          |                  |                |  |  |
| Variants:<br>VaAres1_C_FDSW210055062-<br>l-r | C       | 756 | 756 | 1 | G -> C             |               | 125          | SNP<br>(transversion) | 39.20% |  | 5.40E-93  |        |                             |                          |                  |                |  |  |
| Variants:<br>VaAres1_C_FDSW210055062-<br>l-r | T       | 756 | 756 | 1 | G -> T             |               | 125          | SNP<br>(transversion) | 38.40% |  | 1.60E-114 |        |                             |                          |                  |                |  |  |
| Variants:<br>VaAres1_C_FDSW210055062-<br>l-r | AGC     | 757 | 759 | 3 | TCA -> AGC         | 118 -><br>120 | Substitution | 27.1% -><br>34.2%     |        |  | 1.00E-64  |        |                             |                          |                  |                |  |  |
| Variants:<br>VaAres1_C_FDSW210055062-<br>l-r | T       | 765 | 765 | 1 | C -> T             |               | 133          | SNP<br>(transition)   | 32.30% |  | 4.00E-73  |        |                             |                          |                  |                |  |  |
| Variants:<br>VaAres1_C_FDSW210055062-<br>l-r | A       | 768 | 768 | 1 | T -> A             |               | 144          | SNP<br>(transversion) | 60.40% |  | 3.00E-212 |        |                             |                          |                  |                |  |  |
| Variants:<br>VaAres1_C_FDSW210055062-<br>l-r | T       | 790 | 790 | 1 | G -> T             |               | 264          | SNP<br>(transversion) | 26.10% |  | 1.40E-122 | R -> L | hypothetical<br>protein CDS | hypothetica<br>l protein | Substituti<br>on | KLI69<br>879.1 |  |  |
| Variants:<br>VaAres1_C_FDSW210055062-<br>l-r | A       | 795 | 795 | 1 | G -> A             |               | 292          | SNP<br>(transition)   | 61.00% |  | 0         | A -> T | hypothetical<br>protein CDS | hypothetica<br>l protein | Substituti<br>on | KLI69<br>879.1 |  |  |
| Variants:<br>VaAres1_C_FDSW210055062-<br>l-r | AAT     | 801 | 803 | 2 | CAC -> AAT         | 318 -><br>336 | Substitution | 73.5% -><br>77.7%     |        |  | 0         | H -> N | hypothetical<br>protein CDS | hypothetica<br>l protein | Substituti<br>on | KLI69<br>879.1 |  |  |
| Variants:<br>VaAres1_C_FDSW210055062-<br>l-r | C       | 834 | 834 | 1 | T -> C             |               | 525          | SNP<br>(transition)   | 79.40% |  | 0         | Y -> H | hypothetical<br>protein CDS | hypothetica<br>l protein | Substituti<br>on | KLI69<br>879.1 |  |  |
| Variants:<br>VaAres1_C_FDSW210055062-<br>l-r | G       | 888 | 888 | 1 | A -> G             |               | 782          | SNP<br>(transition)   | 29.90% |  | 0         | I -> V | hypothetical<br>protein CDS | hypothetica<br>l protein | Substituti<br>on | KLI69<br>879.1 |  |  |
| Variants:<br>VaAres1_C_FDSW210055062-<br>l-r | C       | 897 | 897 | 1 | T -> C             |               | 796          | SNP<br>(transition)   | 59.20% |  | 0         | C -> R | hypothetical<br>protein CDS | hypothetica<br>l protein | Substituti<br>on | KLI69<br>879.1 |  |  |
| Variants:<br>VaAres1_C_FDSW210055062-<br>l-r | C       | 900 | 900 | 1 | G -> C             |               | 804          | SNP<br>(transversion) | 59.10% |  | 0         | D -> H | hypothetical<br>protein CDS | hypothetica<br>l protein | Substituti<br>on | KLI69<br>879.1 |  |  |
| Variants:<br>VaAres1_C_FDSW210055062-<br>l-r | C       | 942 | 942 | 1 | G -> C             |               | 778          | SNP<br>(transversion) | 28.00% |  | 0         | G -> R | hypothetical<br>protein CDS | hypothetica<br>l protein | Substituti<br>on | KLI69<br>879.1 |  |  |
| Variants:<br>VaAres1_C_FDSW210055062-<br>l-r | TGT     | 966 | 968 | 2 | AGC -> TGT         | 737 -><br>738 | Substitution | 42.4% -><br>42.5%     |        |  | 0         | S -> C | hypothetical<br>protein CDS | hypothetica<br>l protein | Substituti<br>on | KLI69<br>879.1 |  |  |

|                                             |      |      |      |   |              |               |                       |                   |           |          |                             |                          |                  |                |
|---------------------------------------------|------|------|------|---|--------------|---------------|-----------------------|-------------------|-----------|----------|-----------------------------|--------------------------|------------------|----------------|
| Variants:                                   |      |      |      |   |              |               |                       |                   |           |          |                             |                          |                  |                |
| VaAres1_C_FDSW210055062-<br>1r              | G    | 969  | 969  | 1 | C -> G       | 736           | SNP<br>(transversion) | 28.10%            | 5.1E-310  | P -> A   | hypothetical<br>protein CDS | hypothetica<br>l protein | Substituti<br>on | KLI69<br>879.1 |
| Variants:<br>VaAres1_C_FDSW210055062-<br>1r | A    | 976  | 976  | 1 | T -> A       | 741           | SNP<br>(transversion) | 28.50%            | 6.80E-255 | V -> E   | hypothetical<br>protein CDS | hypothetica<br>l protein | Substituti<br>on | KLI69<br>879.1 |
| Variants:<br>VaAres1_C_FDSW210055062-<br>1r | A    | 1008 | 1008 | 1 | G -> A       | 688           | SNP<br>(transition)   | 31.40%            | 2.40E-250 | V -> I   | hypothetical<br>protein CDS | hypothetica<br>l protein | Substituti<br>on | KLI69<br>879.1 |
| Variants:<br>VaAres1_C_FDSW210055062-<br>1r | C    | 1035 | 1035 | 1 | G -> C       | 729           | SNP<br>(transversion) | 26.20%            | 2.7E-317  | G -> R   | hypothetical<br>protein CDS | hypothetica<br>l protein | Substituti<br>on | KLI69<br>879.1 |
| Variants:<br>VaAres1_C_FDSW210055062-<br>1r | A    | 1041 | 1041 | 1 | G -> A       | 734           | SNP<br>(transition)   | 32.00%            | 0         | A -> T   | hypothetical<br>protein CDS | hypothetica<br>l protein | Substituti<br>on | KLI69<br>879.1 |
| Variants:<br>VaAres1_C_FDSW210055062-<br>1r | C    | 1049 | 1049 | 1 | T -> C       | 724           | SNP<br>(transition)   | 25.10%            | 0         |          | hypothetical<br>protein CDS | hypothetica<br>l protein | None             | KLI69<br>879.1 |
| Variants:<br>VaAres1_C_FDSW210055062-<br>1r | G    | 1083 | 1083 | 1 | A -> G       | 720           | SNP<br>(transition)   | 33.20%            | 0         | K -> E   | hypothetical<br>protein CDS | hypothetica<br>l protein | Substituti<br>on | KLI69<br>879.1 |
| Variants:<br>VaAres1_C_FDSW210055062-<br>1r | A    | 1100 | 1100 | 1 | G -> A       | 733           | SNP<br>(transition)   | 34.10%            | 0         |          | hypothetical<br>protein CDS | hypothetica<br>l protein | None             | KLI69<br>879.1 |
| Variants:<br>VaAres1_C_FDSW210055062-<br>1r | A    | 1101 | 1101 | 1 | G -> A       | 752           | SNP<br>(transition)   | 30.50%            | 0         |          |                             |                          |                  |                |
| Variants:<br>VaAres1_C_FDSW210055062-<br>1r | C    | 1104 | 1104 | 1 | G -> C       | 757           | SNP<br>(transversion) | 34.60%            | 0         |          |                             |                          |                  |                |
| Variants:<br>VaAres1_C_FDSW210055062-<br>1r | T    | 1116 | 1116 | 1 | C -> T       | 786           | SNP<br>(transition)   | 37.90%            | 0         |          | hypothetical<br>protein CDS | hypothetica<br>l protein | None             | KLI69<br>880.1 |
| Variants:<br>VaAres1_C_FDSW210055062-<br>1r | T    | 1119 | 1119 | 1 | C -> T       | 791           | SNP<br>(transition)   | 35.70%            | 0         |          | hypothetical<br>protein CDS | hypothetica<br>l protein | None             | KLI69<br>880.1 |
| Variants:<br>VaAres1_C_FDSW210055062-<br>1r | G    | 1135 | 1135 | 1 | T -> G       | 798           | SNP<br>(transversion) | 58.10%            | 0         | F -> V   | hypothetical<br>protein CDS | hypothetica<br>l protein | Substituti<br>on | KLI69<br>880.1 |
| Variants:<br>VaAres1_C_FDSW210055062-<br>1r | TGTG | 1173 | 1176 | 3 | CATA -> TGTG | 736 -><br>744 | Substitution          | 39.4% -><br>40.2% | 0         | TI -> TV | hypothetical<br>protein CDS | hypothetica<br>l protein | Substituti<br>on | KLI69<br>880.1 |
| Variants:<br>VaAres1_C_FDSW210055062-<br>1r | C    | 1182 | 1182 | 1 | T -> C       | 735           | SNP<br>(transition)   | 40.80%            | 0         |          | hypothetical<br>protein CDS | hypothetica<br>l protein | None             | KLI69<br>880.1 |
| Variants:<br>VaAres1_C_FDSW210055062-<br>1r | G    | 1215 | 1215 | 1 | A -> G       | 649           | SNP<br>(transition)   | 52.10%            | 0         |          | hypothetical<br>protein CDS | hypothetica<br>l protein | None             | KLI69<br>880.1 |
| Variants:<br>VaAres1_C_FDSW210055062-<br>1r | G    | 1218 | 1218 | 1 | A -> G       | 635           | SNP<br>(transition)   | 42.00%            | 0         |          | hypothetical<br>protein CDS | hypothetica<br>l protein | None             | KLI69<br>880.1 |
| Variants:<br>VaAres1_C_FDSW210055062-<br>1r | G    | 1221 | 1221 | 1 | C -> G       | 619           | SNP<br>(transversion) | 41.50%            | 0         |          | hypothetical<br>protein CDS | hypothetica<br>l protein | None             | KLI69<br>880.1 |
| Variants:<br>VaAres1_C_FDSW210055062-<br>1r | GG   | 1232 | 1233 | 2 | AC -> GG     | 557 -><br>562 | Substitution          | 38.6% -><br>39.0% | 0         | N -> R   | hypothetical<br>protein CDS | hypothetica<br>l protein | Substituti<br>on | KLI69<br>880.1 |
| Variants:<br>VaAres1_C_FDSW210055062-<br>1r | T    | 1235 | 1235 | 1 | C -> T       | 548           | SNP<br>(transition)   | 38.90%            | 0         | A -> V   | hypothetical<br>protein CDS | hypothetica<br>l protein | Substituti<br>on | KLI69<br>880.1 |
| Variants:<br>VaAres1_C_FDSW210055062-<br>1r | G    | 1269 | 1269 | 1 | A -> G       | 336           | SNP<br>(transition)   | 53.90%            | 0         | I -> M   | hypothetical<br>protein CDS | hypothetica<br>l protein | Substituti<br>on | KLI69<br>880.1 |
| Variants:<br>VaAres1_C_FDSW210055062-<br>1r | G    | 1275 | 1275 | 1 | A -> G       | 310           | SNP<br>(transition)   | 55.80%            | 0         |          | hypothetical<br>protein CDS | hypothetica<br>l protein | None             | KLI69<br>880.1 |

|                                          |                   |      |      |    |                                   |               |                       |                   |           |                   |                             |                          |                  |                |
|------------------------------------------|-------------------|------|------|----|-----------------------------------|---------------|-----------------------|-------------------|-----------|-------------------|-----------------------------|--------------------------|------------------|----------------|
| Variables:<br>VaAres1_C_FDSW210055062-1r | T                 | 1287 | 1287 | 1  | A -> T                            | 236           | SNP<br>(transversion) | 29.20%            | 1.10E-174 |                   | hypothetical<br>protein CDS | hypothetica<br>l protein | None             | KLI69<br>880.1 |
| Variables:<br>VaAres1_C_FDSW210055062-1r | T                 | 1290 | 1290 | 1  | C -> T                            | 216           | SNP<br>(transition)   | 26.90%            | 5.20E-133 |                   | hypothetical<br>protein CDS | hypothetica<br>l protein | None             | KLI69<br>880.1 |
| Variables:<br>VaAres1_C_FDSW210055062-1r | G                 | 1302 | 1302 | 1  | A -> G                            | 177           | SNP<br>(transition)   | 35.60%            | 4.20E-166 |                   | hypothetical<br>protein CDS | hypothetica<br>l protein | None             | KLI69<br>880.1 |
| Variables:<br>VaAres1_C_FDSW210055062-1r | AAGTT             | 1324 | 1328 | 4  | CACAC -> AAGTT                    | 107 -><br>117 | Substitution          | 85.0% -><br>89.7% | 0.00E+00  | HT -> KF          | hypothetical<br>protein CDS | hypothetica<br>l protein | Substituti<br>on | KLI69<br>880.1 |
| Variables:<br>VaAres1_C_FDSW210055062-1r | AGTGCC            | 1330 | 1335 | 5  | TTAACA -> AGTGCC                  | 87 -><br>97   | Substitution          | 80.4% -><br>84.5% | 4.70E-225 | LT -> SA          | hypothetical<br>protein CDS | hypothetica<br>l protein | Substituti<br>on | KLI69<br>880.1 |
| Variables:<br>VaAres1_C_FDSW210055062-1r | TCGCT             | 1339 | 1343 | 5  | CGTTA -> TCGCT                    | 67 -><br>79   | Substitution          | 54.2% -><br>60.8% | 1.20E-118 |                   | hypothetical<br>protein CDS | hypothetica<br>l protein | Extension        | KLI69<br>880.1 |
| Variables:<br>VaAres1_C_FDSW210055062-1r | T                 | 1345 | 1345 | 1  | G -> T                            | 63            | SNP<br>(transversion) | 55.60%            | 2.00E-105 |                   |                             |                          |                  |                |
| Variables:<br>VaAres1_C_FDSW210055062-1r | TT                | 1347 | 1348 | 2  | AA -> TT                          | 58 -><br>60   | Substitution          | 60.3% -><br>61.7% | 2.80E-114 |                   |                             |                          |                  |                |
| Variables:<br>VaAres1_C_FDSW210055062-1r | AAT               | 1351 | 1353 | 3  | GGA -> AAT                        | 53 -><br>54   | Substitution          | 53.7% -><br>54.7% | 5.30E-87  |                   |                             |                          |                  |                |
| Variables:<br>VaAres1_C_FDSW210055062-1r | CGT               | 1355 | 1357 | 3  | TAA -> CGT                        | 38 -><br>46   | Substitution          | 28.9% -><br>43.5% | 2.40E-32  |                   |                             |                          |                  |                |
| Variables:<br>VaAres1_C_FDSW210055062-1r | A                 | 2106 | 2106 | 1  | T -> A                            | 32            | SNP<br>(transversion) | 28.10%            | 1.40E-26  | F -> L            | hypothetical<br>protein CDS | hypothetica<br>l protein | Substituti<br>on | KLI69<br>881.1 |
| Variables:<br>VaAres1_C_FDSW210055062-1r | GC                | 2108 | 2109 | 2  | CA -> GC                          | 34 -><br>35   | Substitution          | 35.3% -><br>37.1% | 2.20E-36  | A -> G            | hypothetical<br>protein CDS | hypothetica<br>l protein | Substituti<br>on | KLI69<br>881.1 |
| Variables:<br>VaAres1_C_FDSW210055062-1r | AA                | 2111 | 2112 | 2  | TC -> AA                          | 38            | Substitution          | 44.70%            | 2.30E-46  | I -> K            | hypothetical<br>protein CDS | hypothetica<br>l protein | Substituti<br>on | KLI69<br>881.1 |
| Variables:<br>VaAres1_C_FDSW210055062-1r | CCGAAAC<br>GGATGA | 2114 | 2126 | 12 | ATTTTGAAAAAAT -><br>CCGAAACGGATGA | 37 -><br>43   | Substitution          | 48.8% -><br>79.1% | 2.70E-63  | DFEKI -><br>AETDD | hypothetical<br>protein CDS | hypothetica<br>l protein | Substituti<br>on | KLI69<br>881.1 |
| Variables:<br>VaAres1_C_FDSW210055062-1r | AA                | 2128 | 2129 | 2  | GC -> AA                          | 49 -><br>50   | Substitution          | 83.7% -><br>84.0% | 1.80E-131 | A -> N            | hypothetical<br>protein CDS | hypothetica<br>l protein | Substituti<br>on | KLI69<br>881.1 |
| Variables:<br>VaAres1_C_FDSW210055062-1r | CAC               | 2131 | 2133 | 2  | TAA -> CAC                        | 53 -><br>55   | Substitution          | 84.9% -><br>85.5% | 2.80E-149 |                   | hypothetical<br>protein CDS | hypothetica<br>l protein | Extension        | KLI69<br>881.1 |
| Variables:<br>VaAres1_C_FDSW210055062-1r | T                 | 2135 | 2135 | 1  | A -> T                            | 56            | SNP<br>(transversion) | 87.50%            | 9.20E-169 |                   |                             |                          |                  |                |
| Variables:<br>VaAres1_C_FDSW210055062-1r | CTG               | 2137 | 2139 | 3  | AGC -> CTG                        | 60 -><br>61   | Substitution          | 90.0% -><br>90.2% | 5.00E-182 |                   |                             |                          |                  |                |
| Variables:<br>VaAres1_C_FDSW210055062-1r | AG                | 2141 | 2142 | 2  | TT -> AG                          | 63 -><br>66   | Substitution          | 90.5% -><br>90.9% | 5.40E-181 |                   |                             |                          |                  |                |
| Variables:<br>VaAres1_C_FDSW210055062-1r | G                 | 2145 | 2145 | 1  | A -> G                            | 69            | SNP<br>(transition)   | 95.70%            | 1.30E-233 |                   |                             |                          |                  |                |
| Variables:<br>VaAres1_C_FDSW210055062-1r | T                 | 2147 | 2147 | 1  | A -> T                            | 72            | SNP<br>(transversion) | 95.80%            | 1.90E-237 |                   |                             |                          |                  |                |
| Variables:<br>VaAres1_C_FDSW210055062-1r | G                 | 2149 | 2148 | 0  | #NAME?                            | 72            | Insertion             | 95.80%            | 1.90E-237 |                   |                             |                          |                  |                |

|                                                                                                                               |     |      |      |   |            |             |                    |                   |           |
|-------------------------------------------------------------------------------------------------------------------------------|-----|------|------|---|------------|-------------|--------------------|-------------------|-----------|
| Variants:<br>VaAres1_C_FDSW210055062-1r<br>Variants:<br>VaAres1_C_FDSW210055062-1r<br>Variants:<br>VaAres1_C_FDSW210055062-1r | GAG | 2902 | 2904 | 3 | TGA -> GAG | 17 -><br>19 | Substitution       | 94.1% -><br>94.7% | 2.70E-44  |
| Variants:<br>VaAres1_C_FDSW210055062-1r<br>Variants:<br>VaAres1_C_FDSW210055062-1r                                            | GGA | 2906 | 2908 | 3 | TCG -> GGA | 16 -><br>18 | Substitution       | 75.0% -><br>83.3% | 1.80E-27  |
| Variants:<br>VaAres1_C_FDSW210055062-1r<br>Variants:<br>VaAres1_C_FDSW210055062-1r                                            | GGG | 2910 | 2912 | 3 | AAC -> GGG | 13          | Substitution       | 53.80%            | 4.00E-10  |
| Variants:<br>VaAres1_C_FDSW210055062-1r<br>Variants:<br>VaAres1_C_FDSW210055062-1r                                            | G   | 3097 | 3097 | 1 | #NAME?     | 200         | Deletion           | 45.00%            | 2.10E-87  |
| Variants:<br>VaAres1_C_FDSW210055062-1r<br>Variants:<br>VaAres1_C_FDSW210055062-1r                                            | T   | 3454 | 3454 | 1 | A -> G     | 18          | SNP (transition)   | 33.30%            | 6.50E-08  |
| Variants:<br>VaAres1_C_FDSW210055062-1r<br>Variants:<br>VaAres1_C_FDSW210055062-1r                                            | T   | 3455 | 3455 | 1 | G -> T     | 17          | SNP (transversion) | 29.40%            | 1.90E-08  |
| Variants:<br>VaAres1_C_FDSW210055062-1r<br>Variants:<br>VaAres1_C_FDSW210055062-1r                                            | G   | 3456 | 3456 | 1 | T -> G     | 16          | SNP (transversion) | 37.50%            | 7.30E-09  |
| Variants:<br>VaAres1_C_FDSW210055062-1r<br>Variants:<br>VaAres1_C_FDSW210055062-1r                                            | T   | 3659 | 3659 | 1 | G -> T     | 250         | SNP (transversion) | 46.00%            | 0         |
| Variants:<br>VaAres1_C_FDSW210055062-1r<br>Variants:<br>VaAres1_C_FDSW210055062-1r                                            | C   | 3758 | 3758 | 1 | A -> C     | 212         | SNP (transversion) | 58.00%            | 0         |
| Variants:<br>VaAres1_C_FDSW210055062-1r<br>Variants:<br>VaAres1_C_FDSW210055062-1r                                            | G   | 3778 | 3778 | 1 | A -> G     | 222         | SNP (transition)   | 43.70%            | 1.90E-275 |
| Variants:<br>VaAres1_C_FDSW210055062-1r<br>Variants:<br>VaAres1_C_FDSW210055062-1r                                            | T   | 3780 | 3780 | 1 | C -> T     | 218         | SNP (transition)   | 43.60%            | 1.10E-269 |
| Variants:<br>VaAres1_C_FDSW210055062-1r<br>Variants:<br>VaAres1_C_FDSW210055062-1r                                            | C   | 3852 | 3852 | 1 | T -> C     | 209         | SNP (transition)   | 56.90%            | 0         |
| Variants:<br>VaAres1_C_FDSW210055062-1r<br>Variants:<br>VaAres1_C_FDSW210055062-1r                                            | G   | 3864 | 3864 | 1 | A -> G     | 205         | SNP (transition)   | 41.00%            | 9.80E-236 |
| Variants:<br>VaAres1_C_FDSW210055062-1r<br>Variants:<br>VaAres1_C_FDSW210055062-1r                                            | T   | 3922 | 3922 | 1 | C -> T     | 152         | SNP (transition)   | 38.20%            | 7.60E-138 |
| Variants:<br>VaAres1_C_FDSW210055062-1r<br>Variants:<br>VaAres1_C_FDSW210055062-1r                                            | A   | 4023 | 4023 | 1 | T -> A     | 35          | SNP (transversion) | 57.10%            | 3.00E-37  |
| Variants:<br>VaAres1_C_FDSW210055062-1r<br>Variants:<br>VaAres1_C_FDSW210055062-1r                                            | G   | 4023 | 4023 | 1 | T -> G     | 35          | SNP (transversion) | 42.90%            | 8.10E-20  |
| Variants:<br>VaAres1_C_FDSW210055062-1r<br>Variants:<br>VaAres1_C_FDSW210055062-1r                                            | C   | 4029 | 4029 | 1 | T -> C     | 32          | SNP (transition)   | 40.60%            | 1.00E-15  |
| Variants:<br>VaAres1_C_FDSW210055062-1r<br>Variants:<br>VaAres1_C_FDSW210055062-1r                                            | G   | 4035 | 4035 | 1 | C -> G     | 28          | SNP (transversion) | 35.70%            | 9.40E-11  |
| Variants:<br>VaAres1_C_FDSW210055062-1r<br>Variants:<br>VaAres1_C_FDSW210055062-1r                                            | T   | 4035 | 4035 | 1 | C -> T     | 28          | SNP (transition)   | 64.30%            | 3.10E-33  |
| Variants:<br>VaAres1_C_FDSW210055062-1r<br>Variants:<br>VaAres1_C_FDSW210055062-1r                                            | T   | 4036 | 4036 | 1 | G -> T     | 25          | SNP (transversion) | 100.00%           | 1.00E-50  |
| Variants:<br>VaAres1_C_FDSW210055062-1r<br>Variants:<br>VaAres1_C_FDSW210055062-1r                                            | T   | 4037 | 4037 | 1 | G -> T     | 25          | SNP (transversion) | 72.00%            | 1.20E-34  |
| Variants:<br>VaAres1_C_FDSW210055062-1r<br>Variants:<br>VaAres1_C_FDSW210055062-1r                                            |     | 4038 | 4038 | 1 | -C         | 24          | Deletion           | 100.00%           | 2.50E-22  |
| Variants:<br>VaAres1_C_FDSW210055062-1r<br>Variants:<br>VaAres1_C_FDSW210055062-1r                                            | A   | 4040 | 4040 | 1 | T -> A     | 21          | SNP (transversion) | 100.00%           | 1.30E-40  |

|                                             |        |      |      |   |                  |               |                       |                    |          |          |                             |                          |                  |                |  |  |  |
|---------------------------------------------|--------|------|------|---|------------------|---------------|-----------------------|--------------------|----------|----------|-----------------------------|--------------------------|------------------|----------------|--|--|--|
| Variants:<br>VaAres1_C_FDSW210055062-<br>1r | GTTTAA | 4043 | 4048 | 6 | ACCGTT -> GTTTAA | 9 -><br>14    | Substitution          | 88.9% -><br>92.9%  | 1.40E-16 |          |                             |                          |                  |                |  |  |  |
| Variants:<br>VaAres1_C_FDSW210055062-<br>1r | GTGGTA | 4050 | 4055 | 6 | CGCTGC -> GTGGTA | 6 -> 8        | Substitution          | 100.00%            | 2.50E-13 |          |                             |                          |                  |                |  |  |  |
| Variants:<br>VaAres1_C_FDSW210055062-<br>1r | GG     | 4059 | 4060 | 2 | TT -> GG         | 3 -> 5        | Substitution          | 80.0% -><br>100.0% | 1.30E-07 |          |                             |                          |                  |                |  |  |  |
| Variants:<br>VaAres1_C_FDSW210055062-<br>1r | GGC    | 4062 | 4064 | 3 | TCA -> GGC       | 3             | Substitution          | 100.00%            | 1.30E-07 |          |                             |                          |                  |                |  |  |  |
| Variants:<br>VaAres1_C_FDSW210055062-<br>1r | GGTAG  | 4342 | 4346 | 4 | TCGAA -> GGTAG   | 15 -><br>27   | Substitution          | 86.7% -><br>92.6%  | 3.20E-29 | FD -> LP | hypothetical<br>protein CDS | hypothetica<br>l protein | Substituti<br>on | KLI69<br>882.1 |  |  |  |
| Variants:<br>VaAres1_C_FDSW210055062-<br>1r | TG     | 4374 | 4375 | 2 | GA -> TG         | 319 -><br>327 | Substitution          | 99.70%             | 0        | I -> T   | hypothetical<br>protein CDS | hypothetica<br>l protein | Substituti<br>on | KLI69<br>882.1 |  |  |  |
| Variants:<br>VaAres1_C_FDSW210055062-<br>1r | T      | 4379 | 4379 | 1 | C -> T           | 379           | SNP<br>(transition)   | 100.00%            | 0        | A -> T   | hypothetical<br>protein CDS | hypothetica<br>l protein | Substituti<br>on | KLI69<br>882.1 |  |  |  |
| Variants:<br>VaAres1_C_FDSW210055062-<br>1r | CATGA  | 4381 | 4385 | 5 | TGGTG -> CATGA   | 406 -><br>434 | Substitution          | 99.50%             | 0        |          | hypothetical<br>protein CDS | hypothetica<br>l protein | Truncatio<br>n   | KLI69<br>882.1 |  |  |  |
| Variants:<br>VaAres1_C_FDSW210055062-<br>1r | GG     | 4388 | 4389 | 2 | CA -> GG         | 462 -><br>472 | Substitution          | 99.80%             | 0        | PE -> PQ | hypothetical<br>protein CDS | hypothetica<br>l protein | Substituti<br>on | KLI69<br>882.1 |  |  |  |
| Variants:<br>VaAres1_C_FDSW210055062-<br>1r | TGA    | 4392 | 4394 | 2 | CGT -> TGA       | 503 -><br>526 | Substitution          | 100.00%            | 0        | T -> S   | hypothetical<br>protein CDS | hypothetica<br>l protein | Substituti<br>on | KLI69<br>882.1 |  |  |  |
| Variants:<br>VaAres1_C_FDSW210055062-<br>1r | GT     | 4396 | 4397 | 2 | AA -> GT         | 545 -><br>551 | Substitution          | 99.60%             | 0        | F -> T   | hypothetical<br>protein CDS | hypothetica<br>l protein | Substituti<br>on | KLI69<br>882.1 |  |  |  |
| Variants:<br>VaAres1_C_FDSW210055062-<br>1r | A      | 4401 | 4401 | 1 | C -> A           | 574           | SNP<br>(transversion) | 100.00%            | 0        | M -> V   | hypothetical<br>protein CDS | hypothetica<br>l protein | Codon<br>Loss    | KLI69<br>882.1 |  |  |  |
| Variants:<br>VaAres1_C_FDSW210055062-<br>1r | A      | 4404 | 4406 | 3 | GTT -> A         | 600           | Deletion              | 99.70%             | 0        |          |                             |                          |                  |                |  |  |  |
| Variants:<br>VaAres1_C_FDSW210055062-<br>1r | GT     | 4409 | 4410 | 2 | TC -> GT         | 643 -><br>655 | Substitution          | 99.20%             | 0        |          |                             |                          |                  |                |  |  |  |
| Variants:<br>VaAres1_C_FDSW210055062-<br>1r | GC     | 4414 | 4415 | 2 | CT -> GC         | 685 -><br>696 | Substitution          | 99.90%             | 0        |          |                             |                          |                  |                |  |  |  |
| Variants:<br>VaAres1_C_FDSW210055062-<br>1r | A      | 4417 | 4417 | 1 | G -> A           | 724           | SNP<br>(transition)   | 100.00%            | 0        |          |                             |                          |                  |                |  |  |  |
| Variants:<br>VaAres1_C_FDSW210055062-<br>1r | GG     | 4419 | 4420 | 2 | CA -> GG         | 755 -><br>767 | Substitution          | 99.50%             | 0        |          |                             |                          |                  |                |  |  |  |
| Variants:<br>VaAres1_C_FDSW210055062-<br>1r | AC     | 4423 | 4424 | 2 | GA -> AC         | 790 -><br>800 | Substitution          | 98.90%             | 0        |          |                             |                          |                  |                |  |  |  |
| Variants:<br>VaAres1_C_FDSW210055062-<br>1r | G      | 4427 | 4426 | 0 | #NAME?           | 826           | Insertion             | 99.90%             | 0        |          |                             |                          |                  |                |  |  |  |
| Variants:<br>VaAres1_C_FDSW210055062-<br>1r | TG     | 4431 | 4432 | 2 | GA -> TG         | 869 -><br>880 | Substitution          | 99.90%             | 0        |          |                             |                          |                  |                |  |  |  |
| Variants:<br>VaAres1_C_FDSW210055062-<br>1r | A      | 4434 | 4433 | 0 | #NAME?           | 904           | Insertion             | 100.00%            | 0        |          |                             |                          |                  |                |  |  |  |
| Variants:<br>VaAres1_C_FDSW210055062-<br>1r | CA     | 4435 | 4436 | 2 | GT -> CA         | 923 -><br>933 | Substitution          | 99.70%             | 0        |          |                             |                          |                  |                |  |  |  |



|   |   |   |   |   |   |   |   |   |    |    |    |    |    |    |    |    |    |    |    |    |    |    |    |    |    |    |    |    |    |    |    |    |    |    |    |    |    |    |    |    |    |    |    |    |    |    |    |    |    |    |    |    |    |    |    |    |    |    |    |    |    |    |    |    |    |    |    |    |    |    |    |    |    |    |    |    |    |    |    |    |    |    |    |    |    |    |    |    |    |    |    |    |    |    |    |    |    |    |     |     |     |     |     |     |     |     |     |     |     |     |     |     |     |     |     |     |     |     |     |     |     |     |     |     |     |     |     |     |     |     |     |     |     |     |     |     |     |     |     |     |     |     |     |     |     |     |     |     |     |     |     |     |     |     |     |     |     |     |     |     |     |     |     |     |     |     |     |     |     |     |     |     |     |     |     |     |     |     |     |     |     |     |     |     |     |     |     |     |     |     |     |     |     |     |     |     |     |     |     |     |     |     |     |     |     |     |     |     |     |     |     |     |     |     |     |     |     |     |     |     |     |     |     |     |     |     |     |     |     |     |     |     |     |     |     |     |     |     |     |     |     |     |     |     |     |     |     |     |     |     |     |     |     |     |     |     |     |     |     |     |     |     |     |     |     |     |     |     |     |     |     |     |     |     |     |     |     |     |     |     |     |     |     |     |     |     |     |     |     |     |     |     |     |     |     |     |     |     |     |     |     |     |     |     |     |     |     |     |     |     |     |     |     |     |     |     |     |     |     |     |     |     |     |     |     |     |     |     |     |     |     |     |     |     |     |     |     |     |     |     |     |     |     |     |     |     |     |     |     |     |     |     |     |     |     |     |     |     |     |     |     |     |     |     |     |     |     |     |     |     |     |     |     |     |     |     |     |     |     |     |     |     |     |     |     |     |     |     |     |     |     |     |     |     |     |     |     |     |     |     |     |     |     |     |     |     |     |     |     |     |     |     |     |     |     |     |     |     |     |     |     |     |     |     |     |     |     |     |     |     |     |     |     |     |     |     |     |     |     |     |     |     |     |     |     |     |     |     |     |     |     |     |     |     |     |     |     |     |     |     |     |     |     |     |     |     |     |     |     |     |     |     |     |     |     |     |     |     |     |     |     |     |     |     |     |     |     |     |     |     |     |     |     |     |     |     |     |     |     |     |     |     |     |     |     |     |     |     |     |     |     |     |     |     |     |     |     |     |     |     |     |     |     |     |
|---|---|---|---|---|---|---|---|---|----|----|----|----|----|----|----|----|----|----|----|----|----|----|----|----|----|----|----|----|----|----|----|----|----|----|----|----|----|----|----|----|----|----|----|----|----|----|----|----|----|----|----|----|----|----|----|----|----|----|----|----|----|----|----|----|----|----|----|----|----|----|----|----|----|----|----|----|----|----|----|----|----|----|----|----|----|----|----|----|----|----|----|----|----|----|----|----|----|----|-----|-----|-----|-----|-----|-----|-----|-----|-----|-----|-----|-----|-----|-----|-----|-----|-----|-----|-----|-----|-----|-----|-----|-----|-----|-----|-----|-----|-----|-----|-----|-----|-----|-----|-----|-----|-----|-----|-----|-----|-----|-----|-----|-----|-----|-----|-----|-----|-----|-----|-----|-----|-----|-----|-----|-----|-----|-----|-----|-----|-----|-----|-----|-----|-----|-----|-----|-----|-----|-----|-----|-----|-----|-----|-----|-----|-----|-----|-----|-----|-----|-----|-----|-----|-----|-----|-----|-----|-----|-----|-----|-----|-----|-----|-----|-----|-----|-----|-----|-----|-----|-----|-----|-----|-----|-----|-----|-----|-----|-----|-----|-----|-----|-----|-----|-----|-----|-----|-----|-----|-----|-----|-----|-----|-----|-----|-----|-----|-----|-----|-----|-----|-----|-----|-----|-----|-----|-----|-----|-----|-----|-----|-----|-----|-----|-----|-----|-----|-----|-----|-----|-----|-----|-----|-----|-----|-----|-----|-----|-----|-----|-----|-----|-----|-----|-----|-----|-----|-----|-----|-----|-----|-----|-----|-----|-----|-----|-----|-----|-----|-----|-----|-----|-----|-----|-----|-----|-----|-----|-----|-----|-----|-----|-----|-----|-----|-----|-----|-----|-----|-----|-----|-----|-----|-----|-----|-----|-----|-----|-----|-----|-----|-----|-----|-----|-----|-----|-----|-----|-----|-----|-----|-----|-----|-----|-----|-----|-----|-----|-----|-----|-----|-----|-----|-----|-----|-----|-----|-----|-----|-----|-----|-----|-----|-----|-----|-----|-----|-----|-----|-----|-----|-----|-----|-----|-----|-----|-----|-----|-----|-----|-----|-----|-----|-----|-----|-----|-----|-----|-----|-----|-----|-----|-----|-----|-----|-----|-----|-----|-----|-----|-----|-----|-----|-----|-----|-----|-----|-----|-----|-----|-----|-----|-----|-----|-----|-----|-----|-----|-----|-----|-----|-----|-----|-----|-----|-----|-----|-----|-----|-----|-----|-----|-----|-----|-----|-----|-----|-----|-----|-----|-----|-----|-----|-----|-----|-----|-----|-----|-----|-----|-----|-----|-----|-----|-----|-----|-----|-----|-----|-----|-----|-----|-----|-----|-----|-----|-----|-----|-----|-----|-----|-----|-----|-----|-----|-----|-----|-----|-----|-----|-----|-----|-----|-----|-----|-----|-----|-----|-----|-----|-----|-----|-----|-----|-----|-----|-----|-----|-----|-----|-----|-----|-----|-----|-----|-----|-----|-----|-----|-----|-----|-----|-----|-----|-----|-----|-----|-----|-----|-----|-----|-----|-----|-----|-----|-----|-----|-----|-----|-----|-----|-----|-----|-----|-----|-----|-----|-----|-----|-----|-----|-----|-----|-----|-----|
| 1 | 2 | 3 | 4 | 5 | 6 | 7 | 8 | 9 | 10 | 11 | 12 | 13 | 14 | 15 | 16 | 17 | 18 | 19 | 20 | 21 | 22 | 23 | 24 | 25 | 26 | 27 | 28 | 29 | 30 | 31 | 32 | 33 | 34 | 35 | 36 | 37 | 38 | 39 | 40 | 41 | 42 | 43 | 44 | 45 | 46 | 47 | 48 | 49 | 50 | 51 | 52 | 53 | 54 | 55 | 56 | 57 | 58 | 59 | 60 | 61 | 62 | 63 | 64 | 65 | 66 | 67 | 68 | 69 | 70 | 71 | 72 | 73 | 74 | 75 | 76 | 77 | 78 | 79 | 80 | 81 | 82 | 83 | 84 | 85 | 86 | 87 | 88 | 89 | 90 | 91 | 92 | 93 | 94 | 95 | 96 | 97 | 98 | 99 | 100 | 101 | 102 | 103 | 104 | 105 | 106 | 107 | 108 | 109 | 110 | 111 | 112 | 113 | 114 | 115 | 116 | 117 | 118 | 119 | 120 | 121 | 122 | 123 | 124 | 125 | 126 | 127 | 128 | 129 | 130 | 131 | 132 | 133 | 134 | 135 | 136 | 137 | 138 | 139 | 140 | 141 | 142 | 143 | 144 | 145 | 146 | 147 | 148 | 149 | 150 | 151 | 152 | 153 | 154 | 155 | 156 | 157 | 158 | 159 | 160 | 161 | 162 | 163 | 164 | 165 | 166 | 167 | 168 | 169 | 170 | 171 | 172 | 173 | 174 | 175 | 176 | 177 | 178 | 179 | 180 | 181 | 182 | 183 | 184 | 185 | 186 | 187 | 188 | 189 | 190 | 191 | 192 | 193 | 194 | 195 | 196 | 197 | 198 | 199 | 200 | 201 | 202 | 203 | 204 | 205 | 206 | 207 | 208 | 209 | 210 | 211 | 212 | 213 | 214 | 215 | 216 | 217 | 218 | 219 | 220 | 221 | 222 | 223 | 224 | 225 | 226 | 227 | 228 | 229 | 230 | 231 | 232 | 233 | 234 | 235 | 236 | 237 | 238 | 239 | 240 | 241 | 242 | 243 | 244 | 245 | 246 | 247 | 248 | 249 | 250 | 251 | 252 | 253 | 254 | 255 | 256 | 257 | 258 | 259 | 260 | 261 | 262 | 263 | 264 | 265 | 266 | 267 | 268 | 269 | 270 | 271 | 272 | 273 | 274 | 275 | 276 | 277 | 278 | 279 | 280 | 281 | 282 | 283 | 284 | 285 | 286 | 287 | 288 | 289 | 290 | 291 | 292 | 293 | 294 | 295 | 296 | 297 | 298 | 299 | 300 | 301 | 302 | 303 | 304 | 305 | 306 | 307 | 308 | 309 | 310 | 311 | 312 | 313 | 314 | 315 | 316 | 317 | 318 | 319 | 320 | 321 | 322 | 323 | 324 | 325 | 326 | 327 | 328 | 329 | 330 | 331 | 332 | 333 | 334 | 335 | 336 | 337 | 338 | 339 | 340 | 341 | 342 | 343 | 344 | 345 | 346 | 347 | 348 | 349 | 350 | 351 | 352 | 353 | 354 | 355 | 356 | 357 | 358 | 359 | 360 | 361 | 362 | 363 | 364 | 365 | 366 | 367 | 368 | 369 | 370 | 371 | 372 | 373 | 374 | 375 | 376 | 377 | 378 | 379 | 380 | 381 | 382 | 383 | 384 | 385 | 386 | 387 | 388 | 389 | 390 | 391 | 392 | 393 | 394 | 395 | 396 | 397 | 398 | 399 | 400 | 401 | 402 | 403 | 404 | 405 | 406 | 407 | 408 | 409 | 410 | 411 | 412 | 413 | 414 | 415 | 416 | 417 | 418 | 419 | 420 | 421 | 422 | 423 | 424 | 425 | 426 | 427 | 428 | 429 | 430 | 431 | 432 | 433 | 434 | 435 | 436 | 437 | 438 | 439 | 440 | 441 | 442 | 443 | 444 | 445 | 446 | 447 | 448 | 449 | 450 | 451 | 452 | 453 | 454 | 455 | 456 | 457 | 458 | 459 | 460 | 461 | 462 | 463 | 464 | 465 | 466 | 467 | 468 | 469 | 470 | 471 | 472 | 473 | 474 | 475 | 476 | 477 | 478 | 479 | 480 | 481 | 482 | 483 | 484 | 485 | 486 | 487 | 488 | 489 | 490 | 491 | 492 | 493 | 494 | 495 | 496 | 497 | 498 | 499 | 500 | 501 | 502 | 503 | 504 | 505 | 506 | 507 | 508 | 509 | 510 | 511 | 512 | 513 | 514 | 515 | 516 | 517 | 518 | 519 | 520 | 521 | 522 | 523 | 524 | 525 |
|---|---|---|---|---|---|---|---|---|----|----|----|----|----|----|----|----|----|----|----|----|----|----|----|----|----|----|----|----|----|----|----|----|----|----|----|----|----|----|----|----|----|----|----|----|----|----|----|----|----|----|----|----|----|----|----|----|----|----|----|----|----|----|----|----|----|----|----|----|----|----|----|----|----|----|----|----|----|----|----|----|----|----|----|----|----|----|----|----|----|----|----|----|----|----|----|----|----|----|-----|-----|-----|-----|-----|-----|-----|-----|-----|-----|-----|-----|-----|-----|-----|-----|-----|-----|-----|-----|-----|-----|-----|-----|-----|-----|-----|-----|-----|-----|-----|-----|-----|-----|-----|-----|-----|-----|-----|-----|-----|-----|-----|-----|-----|-----|-----|-----|-----|-----|-----|-----|-----|-----|-----|-----|-----|-----|-----|-----|-----|-----|-----|-----|-----|-----|-----|-----|-----|-----|-----|-----|-----|-----|-----|-----|-----|-----|-----|-----|-----|-----|-----|-----|-----|-----|-----|-----|-----|-----|-----|-----|-----|-----|-----|-----|-----|-----|-----|-----|-----|-----|-----|-----|-----|-----|-----|-----|-----|-----|-----|-----|-----|-----|-----|-----|-----|-----|-----|-----|-----|-----|-----|-----|-----|-----|-----|-----|-----|-----|-----|-----|-----|-----|-----|-----|-----|-----|-----|-----|-----|-----|-----|-----|-----|-----|-----|-----|-----|-----|-----|-----|-----|-----|-----|-----|-----|-----|-----|-----|-----|-----|-----|-----|-----|-----|-----|-----|-----|-----|-----|-----|-----|-----|-----|-----|-----|-----|-----|-----|-----|-----|-----|-----|-----|-----|-----|-----|-----|-----|-----|-----|-----|-----|-----|-----|-----|-----|-----|-----|-----|-----|-----|-----|-----|-----|-----|-----|-----|-----|-----|-----|-----|-----|-----|-----|-----|-----|-----|-----|-----|-----|-----|-----|-----|-----|-----|-----|-----|-----|-----|-----|-----|-----|-----|-----|-----|-----|-----|-----|-----|-----|-----|-----|-----|-----|-----|-----|-----|-----|-----|-----|-----|-----|-----|-----|-----|-----|-----|-----|-----|-----|-----|-----|-----|-----|-----|-----|-----|-----|-----|-----|-----|-----|-----|-----|-----|-----|-----|-----|-----|-----|-----|-----|-----|-----|-----|-----|-----|-----|-----|-----|-----|-----|-----|-----|-----|-----|-----|-----|-----|-----|-----|-----|-----|-----|-----|-----|-----|-----|-----|-----|-----|-----|-----|-----|-----|-----|-----|-----|-----|-----|-----|-----|-----|-----|-----|-----|-----|-----|-----|-----|-----|-----|-----|-----|-----|-----|-----|-----|-----|-----|-----|-----|-----|-----|-----|-----|-----|-----|-----|-----|-----|-----|-----|-----|-----|-----|-----|-----|-----|-----|-----|-----|-----|-----|-----|-----|-----|-----|-----|-----|-----|-----|-----|-----|-----|-----|-----|-----|-----|-----|-----|-----|-----|-----|-----|-----|-----|-----|-----|-----|-----|-----|-----|-----|-----|-----|-----|-----|-----|-----|-----|-----|-----|-----|-----|-----|-----|-----|-----|-----|-----|-----|-----|-----|-----|-----|-----|-----|-----|-----|-----|-----|-----|-----|

|                            |   |      |      |   |        |    |                    |        |           |
|----------------------------|---|------|------|---|--------|----|--------------------|--------|-----------|
| Variants:                  |   |      |      |   |        |    |                    |        |           |
| VaAres1_C_FDSW210055062-1r | A | 4995 | 4995 | 1 | G -> A | 95 | SNP (transition)   | 55.80% | 1.10E-153 |
| Variants:                  |   |      |      |   |        |    |                    |        |           |
| VaAres1_C_FDSW210055062-1r | C | 4995 | 4995 | 1 | G -> C | 95 | SNP (transversion) | 36.80% | 3.70E-97  |
| Variants:                  |   |      |      |   |        |    |                    |        |           |
| VaAres1_C_FDSW210055062-1r | A | 4996 | 4996 | 1 | T -> A | 89 | SNP (transversion) | 39.30% | 2.20E-98  |
| Variants:                  |   |      |      |   |        |    |                    |        |           |
| VaAres1_C_FDSW210055062-1r | C | 4996 | 4996 | 1 | T -> C | 89 | SNP (transition)   | 52.80% | 7.10E-135 |
| Variants:                  |   |      |      |   |        |    |                    |        |           |
| VaAres1_C_FDSW210055062-1r | A | 4997 | 4997 | 1 | G -> A | 85 | SNP (transition)   | 51.80% | 1.20E-134 |
| Variants:                  |   |      |      |   |        |    |                    |        |           |
| VaAres1_C_FDSW210055062-1r | C | 4997 | 4997 | 1 | G -> C | 85 | SNP (transversion) | 40.00% | 2.40E-99  |
| Variants:                  |   |      |      |   |        |    |                    |        |           |
| VaAres1_C_FDSW210055062-1r | A | 4998 | 4998 | 1 | G -> A | 82 | SNP (transition)   | 40.20% | 1.40E-96  |
| Variants:                  |   |      |      |   |        |    |                    |        |           |
| VaAres1_C_FDSW210055062-1r | T | 4998 | 4998 | 1 | G -> T | 82 | SNP (transversion) | 29.30% | 8.00E-62  |
| Variants:                  |   |      |      |   |        |    |                    |        |           |
| VaAres1_C_FDSW210055062-1r | T | 4999 | 4999 | 1 | C -> T | 81 | SNP (transition)   | 66.70% | 5.70E-163 |
| Variants:                  |   |      |      |   |        |    |                    |        |           |
| VaAres1_C_FDSW210055062-1r | C | 5000 | 5000 | 1 | A -> C | 79 | SNP (transversion) | 25.30% | 2.60E-54  |
| Variants:                  |   |      |      |   |        |    |                    |        |           |
| VaAres1_C_FDSW210055062-1r | T | 5000 | 5000 | 1 | A -> T | 79 | SNP (transversion) | 63.30% | 3.30E-149 |
| Variants:                  |   |      |      |   |        |    |                    |        |           |
| VaAres1_C_FDSW210055062-1r | C | 5001 | 5001 | 1 | T -> C | 75 | SNP (transition)   | 38.70% | 2.00E-84  |
| Variants:                  |   |      |      |   |        |    |                    |        |           |
| VaAres1_C_FDSW210055062-1r | A | 5002 | 5002 | 1 | T -> A | 73 | SNP (transversion) | 61.60% | 3.80E-129 |
| Variants:                  |   |      |      |   |        |    |                    |        |           |
| VaAres1_C_FDSW210055062-1r | A | 5003 | 5003 | 1 | T -> A | 70 | SNP (transversion) | 62.90% | 1.70E-122 |
| Variants:                  |   |      |      |   |        |    |                    |        |           |
| VaAres1_C_FDSW210055062-1r | A | 5004 | 5004 | 1 | T -> A | 65 | SNP (transversion) | 27.70% | 1.90E-44  |
| Variants:                  |   |      |      |   |        |    |                    |        |           |
| VaAres1_C_FDSW210055062-1r | G | 5004 | 5004 | 1 | T -> G | 65 | SNP (transversion) | 35.40% | 3.60E-66  |
| Variants:                  |   |      |      |   |        |    |                    |        |           |
| VaAres1_C_FDSW210055062-1r | G | 5005 | 5005 | 1 | T -> G | 63 | SNP (transversion) | 44.40% | 2.50E-75  |
| Variants:                  |   |      |      |   |        |    |                    |        |           |
| VaAres1_C_FDSW210055062-1r | G | 5006 | 5006 | 1 | A -> G | 60 | SNP (transition)   | 41.70% | 5.10E-69  |
| Variants:                  |   |      |      |   |        |    |                    |        |           |
| VaAres1_C_FDSW210055062-1r | T | 5006 | 5006 | 1 | A -> T | 60 | SNP (transversion) | 36.70% | 1.40E-61  |
| Variants:                  |   |      |      |   |        |    |                    |        |           |
| VaAres1_C_FDSW210055062-1r | G | 5007 | 5007 | 1 | C -> G | 57 | SNP (transversion) | 31.60% | 1.90E-47  |
| Variants:                  |   |      |      |   |        |    |                    |        |           |
| VaAres1_C_FDSW210055062-1r | T | 5007 | 5007 | 1 | C -> T | 57 | SNP (transition)   | 45.60% | 1.20E-75  |
| Variants:                  |   |      |      |   |        |    |                    |        |           |
| VaAres1_C_FDSW210055062-1r | C | 5009 | 5009 | 1 | A -> C | 49 | SNP (transversion) | 36.70% | 1.10E-50  |

|                            |     |      |      |   |            |          |                    |                |           |
|----------------------------|-----|------|------|---|------------|----------|--------------------|----------------|-----------|
| Variants:                  |     |      |      |   |            |          |                    |                |           |
| VaAres1_C_FDSW210055062-1r | T   | 5009 | 5009 | 1 | A -> T     | 49       | SNP (transversion) | 36.70%         | 7.20E-49  |
| Variants:                  |     |      |      |   |            |          |                    |                |           |
| VaAres1_C_FDSW210055062-1r | C   | 5010 | 5010 | 1 | T -> C     | 51       | SNP (transition)   | 35.30%         | 2.80E-50  |
| Variants:                  |     |      |      |   |            |          |                    |                |           |
| VaAres1_C_FDSW210055062-1r | T   | 5011 | 5011 | 1 | G -> T     | 47       | SNP (transversion) | 68.10%         | 1.20E-97  |
| Variants:                  |     |      |      |   |            |          |                    |                |           |
| VaAres1_C_FDSW210055062-1r | G   | 5012 | 5012 | 1 | C -> G     | 37       | SNP (transversion) | 40.50%         | 2.90E-40  |
| Variants:                  |     |      |      |   |            |          |                    |                |           |
| VaAres1_C_FDSW210055062-1r | C   | 5014 | 5014 | 1 | T -> C     | 29       | SNP (transition)   | 48.30%         | 7.70E-42  |
| Variants:                  |     |      |      |   |            |          |                    |                |           |
| VaAres1_C_FDSW210055062-1r | TT  | 5016 | 5017 | 2 | GG -> TT   | 27 -> 28 | Substitution       | 37.0% -> 39.3% | 1.70E-27  |
| Variants:                  |     |      |      |   |            |          |                    |                |           |
| VaAres1_C_FDSW210055062-1r | G   | 5020 | 5020 | 1 | T -> G     | 26       | SNP (transversion) | 34.60%         | 1.60E-27  |
| Variants:                  |     |      |      |   |            |          |                    |                |           |
| VaAres1_C_FDSW210055062-1r | T   | 5022 | 5022 | 1 | A -> T     | 23       | SNP (transversion) | 26.10%         | 6.40E-18  |
| Variants:                  |     |      |      |   |            |          |                    |                |           |
| VaAres1_C_FDSW210055062-1r | C   | 5579 | 5579 | 1 | G -> C     | 50       | SNP (transversion) | 98.00%         | 1.00E-160 |
| Variants:                  |     |      |      |   |            |          |                    |                |           |
| VaAres1_C_FDSW210055062-1r | T   | 5581 | 5581 | 1 | A -> T     | 49       | SNP (transversion) | 100.00%        | 1.60E-157 |
| Variants:                  |     |      |      |   |            |          |                    |                |           |
| VaAres1_C_FDSW210055062-1r | CG  | 5583 | 5584 | 2 | TA -> CG   | 48       | Substitution       | 100.00%        | 4.00E-159 |
| Variants:                  |     |      |      |   |            |          |                    |                |           |
| VaAres1_C_FDSW210055062-1r | GTC | 5605 | 5607 | 3 | TAA -> GTC | 46 -> 47 | Substitution       | 27.7% -> 30.4% | 4.40E-35  |
| Variants:                  |     |      |      |   |            |          |                    |                |           |
| VaAres1_C_FDSW210055062-1r | TT  | 5609 | 5610 | 2 | AA -> TT   | 44       | Substitution       | 31.8% -> 36.4% | 1.10E-31  |
| Variants:                  |     |      |      |   |            |          |                    |                |           |
| VaAres1_C_FDSW210055062-1r | AA  | 5612 | 5613 | 2 | GC -> AA   | 47 -> 49 | Substitution       | 42.6% -> 44.9% | 9.60E-52  |
| Variants:                  |     |      |      |   |            |          |                    |                |           |
| VaAres1_C_FDSW210055062-1r | GGG | 5615 | 5617 | 3 | TTA -> GGG | 51 -> 53 | Substitution       | 48.1% -> 52.9% | 4.90E-77  |
| Variants:                  |     |      |      |   |            |          |                    |                |           |
| VaAres1_C_FDSW210055062-1r | A   | 5618 | 5618 | 1 | G -> A     | 48       | SNP (transition)   | 62.50%         | 7.30E-90  |
| Variants:                  |     |      |      |   |            |          |                    |                |           |
| VaAres1_C_FDSW210055062-1r | T   | 5618 | 5618 | 1 | G -> T     | 48       | SNP (transversion) | 37.50%         | 4.50E-40  |
| Variants:                  |     |      |      |   |            |          |                    |                |           |
| VaAres1_C_FDSW210055062-1r | GT  | 5619 | 5620 | 2 | TC -> GT   | 45 -> 48 | Substitution       | 100.00%        | 1.00E-144 |
| Variants:                  |     |      |      |   |            |          |                    |                |           |
| VaAres1_C_FDSW210055062-1r | C   | 5621 | 5621 | 1 | G -> C     | 47       | SNP (transversion) | 66.00%         | 4.70E-97  |
| Variants:                  |     |      |      |   |            |          |                    |                |           |
| VaAres1_C_FDSW210055062-1r | T   | 5622 | 5622 | 1 | C -> T     | 48       | SNP (transition)   | 97.90%         | 1.90E-149 |
| Variants:                  |     |      |      |   |            |          |                    |                |           |
| VaAres1_C_FDSW210055062-1r | G   | 5623 | 5623 | 1 | C -> G     | 50       | SNP (transversion) | 70.00%         | 2.20E-107 |
| Variants:                  |     |      |      |   |            |          |                    |                |           |
| VaAres1_C_FDSW210055062-1r | AA  | 5624 | 5625 | 2 | TT -> AA   | 50 -> 51 | Substitution       | 98.00%         | 6.30E-151 |

|                                                  |      |      |      |   |              |            |                                             |                |           |
|--------------------------------------------------|------|------|------|---|--------------|------------|---------------------------------------------|----------------|-----------|
| Variables:<br>VaAres1_C_FDSW210055062-1r         | A    | 5626 | 5626 | 1 | G -> A       | 52         | SNP<br>(transition)                         | 71.20%         | 1.40E-117 |
| Variables:<br>VaAres1_C_FDSW210055062-1r         | T    | 5626 | 5626 | 1 | G -> T       | 52         | SNP<br>(transversion)                       | 26.90%         | 6.40E-25  |
| Variables:<br>VaAres1_C_FDSW210055062-1r         | T    | 5632 | 5632 | 1 | A -> T       | 63         | SNP<br>(transversion)                       | 93.70%         | 2.30E-148 |
| Variables:<br>VaAres1_C_FDSW210055062-1r         | TATG | 5633 | 5636 | 4 | ATCA -> TATG | 57 -> 63   | Substitution                                | 63.5% -> 70.2% | 8.10E-99  |
| Variables:<br>VaAres1_C_FDSW210055062-1r         | A    | 5637 | 5637 | 1 | T -> A       | 58         | SNP<br>(transversion)                       | 89.70%         | 6.40E-144 |
| Variables:<br>VaAres1_C_FDSW210055062-1r         | A    | 5638 | 5638 | 1 | T -> A       | 59         | SNP<br>(transversion)                       | 71.20%         | 1.70E-116 |
| Variables:<br>VaAres1_C_FDSW210055062-1r         | AG   | 5645 | 5646 | 2 | TC -> AG     | 73         | Substitution<br>Deletion<br>(tandem repeat) | 79.50%         | 3.60E-171 |
| Variables: VaAres1_C_FDSW210055062-1r            |      | 5648 | 5648 | 1 | (C)3 -> (C)2 | 83         |                                             | 68.70%         | 3.40E-65  |
| Variables:<br>VaAres1_C_FDSW210055062-1r         | T    | 5653 | 5653 | 1 | G -> T       | 112        | SNP<br>(transversion)                       | 59.80%         | 1.10E-156 |
| Variables:<br>VaAres1_C_FDSW210055062-1r         | GC   | 5658 | 5657 | 0 | #NAME?       | 136        | Insertion                                   | 48.50%         | 5.20E-159 |
| Variables:<br>VaphiVaphiSt2_B_A_FDSW210055054-2r | TGGT | 79   | 82   | 4 | CCTG -> TGGT | 102 -> 111 | Substitution                                | 82.9% -> 84.3% | 1.90E-249 |
| Variables:<br>VaphiVaphiSt2_B_A_FDSW210055054-2r | G    | 84   | 84   | 1 | A -> G       | 87         | SNP<br>(transition)                         | 95.40%         | 1.10E-251 |
| Variables:<br>VaphiVaphiSt2_B_A_FDSW210055054-2r | GGGG | 86   | 89   | 4 | CATC -> GGGG | 73 -> 79   | Substitution                                | 85.3% -> 86.3% | 1.70E-193 |
| Variables:<br>VaphiVaphiSt2_B_A_FDSW210055054-2r | C    | 91   | 91   | 1 | T -> C       | 70         | SNP<br>(transition)                         | 92.90%         | 3.80E-182 |
| Variables:<br>VaphiVaphiSt2_B_A_FDSW210055054-2r | GGA  | 93   | 95   | 3 | CAC -> GGA   | 64 -> 69   | Substitution                                | 76.6% -> 81.2% | 4.70E-127 |
| Variables:<br>VaphiVaphiSt2_B_A_FDSW210055054-2r | T    | 97   | 97   | 1 | A -> T       | 66         | SNP<br>(transversion)                       | 83.30%         | 1.10E-142 |
| Variables:<br>VaphiVaphiSt2_B_A_FDSW210055054-2r | GAA  | 99   | 101  | 3 | CGT -> GAA   | 56 -> 57   | Substitution                                | 64.9% -> 69.6% | 9.30E-84  |
| Variables:<br>VaphiVaphiSt2_B_A_FDSW210055054-2r | C    | 102  | 102  | 1 | T -> C       | 58         | SNP<br>(transition)                         | 75.90%         | 9.70E-98  |
| Variables:<br>VaphiVaphiSt2_B_A_FDSW210055054-2r | C    | 103  | 102  | 0 | +C           | 57         | Insertion                                   | 36.80%         | 6.00E-38  |
| Variables:<br>VaphiVaphiSt2_B_A_FDSW210055054-2r | A    | 104  | 104  | 1 | C -> A       | 71         | SNP<br>(transversion)                       | 29.60%         | 2.20E-31  |
| Variables:<br>VaphiVaphiSt2_B_A_FDSW210055054-2r | C    | 108  | 108  | 1 | A -> C       | 79         | SNP<br>(transversion)                       | 38.00%         | 3.40E-39  |
| Variables:<br>VaphiVaphiSt2_B_A_FDSW210055054-2r | G    | 120  | 120  | 1 | A -> G       | 111        | SNP<br>(transition)                         | 33.30%         | 1.10E-34  |

|                                        |   |     |     |   |        |     |                       |                     |
|----------------------------------------|---|-----|-----|---|--------|-----|-----------------------|---------------------|
| Variants:                              |   |     |     |   |        |     |                       |                     |
| VaphiVaphiSt2_B_A_FDSW21<br>0055054-2r | T | 126 | 126 | 1 | C -> T | 132 | SNP<br>(transition)   | 43.90%<br>4.70E-45  |
| Variants:                              |   |     |     |   |        |     |                       |                     |
| VaphiVaphiSt2_B_A_FDSW21<br>0055054-2r | T | 129 | 129 | 1 | C -> T | 139 | SNP<br>(transition)   | 76.30%<br>3.20E-149 |
| Variants:                              |   |     |     |   |        |     |                       |                     |
| VaphiVaphiSt2_B_A_FDSW21<br>0055054-2r | G | 132 | 132 | 1 | C -> G | 148 | SNP<br>(transversion) | 37.20%<br>1.20E-91  |
| Variants:                              |   |     |     |   |        |     |                       |                     |
| VaphiVaphiSt2_B_A_FDSW21<br>0055054-2r | T | 144 | 144 | 1 | C -> T | 187 | SNP<br>(transition)   | 46.50%<br>3.70E-86  |
| Variants:                              |   |     |     |   |        |     |                       |                     |
| VaphiVaphiSt2_B_A_FDSW21<br>0055054-2r | G | 150 | 150 | 1 | C -> G | 209 | SNP<br>(transversion) | 35.40%<br>2.60E-84  |
| Variants:                              |   |     |     |   |        |     |                       |                     |
| VaphiVaphiSt2_B_A_FDSW21<br>0055054-2r | A | 159 | 159 | 1 | G -> A | 231 | SNP<br>(transition)   | 81.00%<br>0         |
| Variants:                              |   |     |     |   |        |     |                       |                     |
| VaphiVaphiSt2_B_A_FDSW21<br>0055054-2r | A | 165 | 165 | 1 | T -> A | 248 | SNP<br>(transversion) | 37.10%<br>6.50E-143 |
| Variants:                              |   |     |     |   |        |     |                       |                     |
| VaphiVaphiSt2_B_A_FDSW21<br>0055054-2r | A | 183 | 183 | 1 | G -> A | 319 | SNP<br>(transition)   | 27.90%<br>5.20E-134 |
| Variants:                              |   |     |     |   |        |     |                       |                     |
| VaphiVaphiSt2_B_A_FDSW21<br>0055054-2r | A | 192 | 192 | 1 | G -> A | 356 | SNP<br>(transition)   | 34.60%<br>1.60E-271 |
| Variants:                              |   |     |     |   |        |     |                       |                     |
| VaphiVaphiSt2_B_A_FDSW21<br>0055054-2r | G | 216 | 216 | 1 | A -> G | 419 | SNP<br>(transition)   | 27.00%<br>2.10E-246 |
| Variants:                              |   |     |     |   |        |     |                       |                     |
| VaphiVaphiSt2_B_A_FDSW21<br>0055054-2r | T | 225 | 225 | 1 | A -> T | 438 | SNP<br>(transversion) | 47.70%<br>7.60E-269 |
| Variants:                              |   |     |     |   |        |     |                       |                     |
| VaphiVaphiSt2_B_A_FDSW21<br>0055054-2r | C | 237 | 237 | 1 | T -> C | 457 | SNP<br>(transition)   | 33.00%<br>1.50E-135 |
| Variants:                              |   |     |     |   |        |     |                       |                     |
| VaphiVaphiSt2_B_A_FDSW21<br>0055054-2r | C | 240 | 240 | 1 | T -> C | 463 | SNP<br>(transition)   | 41.70%<br>8.50E-272 |
| Variants:                              |   |     |     |   |        |     |                       |                     |
| VaphiVaphiSt2_B_A_FDSW21<br>0055054-2r | A | 294 | 294 | 1 | G -> A | 422 | SNP<br>(transition)   | 42.70%<br>0         |
| Variants:                              |   |     |     |   |        |     |                       |                     |
| VaphiVaphiSt2_B_A_FDSW21<br>0055054-2r | A | 303 | 303 | 1 | T -> A | 425 | SNP<br>(transversion) | 30.10%<br>2.70E-222 |
| Variants:                              |   |     |     |   |        |     |                       |                     |
| VaphiVaphiSt2_B_A_FDSW21<br>0055054-2r | G | 306 | 306 | 1 | A -> G | 434 | SNP<br>(transition)   | 29.50%<br>6.40E-221 |
| Variants:                              |   |     |     |   |        |     |                       |                     |
| VaphiVaphiSt2_B_A_FDSW21<br>0055054-2r | A | 315 | 315 | 1 | G -> A | 449 | SNP<br>(transition)   | 25.40%<br>2.30E-188 |
| Variants:                              |   |     |     |   |        |     |                       |                     |
| VaphiVaphiSt2_B_A_FDSW21<br>0055054-2r | A | 357 | 357 | 1 | G -> A | 442 | SNP<br>(transition)   | 41.20%<br>0         |
| Variants:                              |   |     |     |   |        |     |                       |                     |
| VaphiVaphiSt2_B_A_FDSW21<br>0055054-2r | G | 363 | 363 | 1 | A -> G | 450 | SNP<br>(transition)   | 45.30%<br>0         |
| Variants:                              |   |     |     |   |        |     |                       |                     |
| VaphiVaphiSt2_B_A_FDSW21<br>0055054-2r | C | 369 | 369 | 1 | T -> C | 461 | SNP<br>(transition)   | 93.10%<br>0         |
| Variants:                              |   |     |     |   |        |     |                       |                     |
| VaphiVaphiSt2_B_A_FDSW21<br>0055054-2r | A | 371 | 371 | 1 | G -> A | 459 | SNP<br>(transition)   | 59.00%<br>0         |
| Variants:                              |   |     |     |   |        |     |                       |                     |
| VaphiVaphiSt2_B_A_FDSW21<br>0055054-2r | G | 387 | 387 | 1 | C -> G | 517 | SNP<br>(transversion) | 66.00%<br>0         |

|                                                      |   |     |     |   |        |     |                       |        |           |   |
|------------------------------------------------------|---|-----|-----|---|--------|-----|-----------------------|--------|-----------|---|
| Variables:<br>VaphiVaphiSt2_B_A_FDSW21<br>0055054-2r | A | 393 | 393 | 1 | G -> A | 524 | SNP<br>(transition)   | 30.70% | 8.2E-313  |   |
| Variables:<br>VaphiVaphiSt2_B_A_FDSW21<br>0055054-2r | C | 393 | 393 | 1 | G -> C | 524 | SNP<br>(transversion) | 54.20% |           | 0 |
| Variables:<br>VaphiVaphiSt2_B_A_FDSW21<br>0055054-2r | C | 396 | 396 | 1 | A -> C | 531 | SNP<br>(transversion) | 38.40% |           | 0 |
| Variables:<br>VaphiVaphiSt2_B_A_FDSW21<br>0055054-2r | G | 420 | 420 | 1 | A -> G | 586 | SNP<br>(transition)   | 34.60% |           | 0 |
| Variables:<br>VaphiVaphiSt2_B_A_FDSW21<br>0055054-2r | T | 420 | 420 | 1 | A -> T | 586 | SNP<br>(transversion) | 41.30% |           | 0 |
| Variables:<br>VaphiVaphiSt2_B_A_FDSW21<br>0055054-2r | A | 422 | 422 | 1 | T -> A | 584 | SNP<br>(transversion) | 40.80% |           | 0 |
| Variables:<br>VaphiVaphiSt2_B_A_FDSW21<br>0055054-2r | A | 423 | 423 | 1 | G -> A | 586 | SNP<br>(transition)   | 75.10% |           | 0 |
| Variables:<br>VaphiVaphiSt2_B_A_FDSW21<br>0055054-2r | A | 426 | 426 | 1 | G -> A | 592 | SNP<br>(transition)   | 74.30% |           | 0 |
| Variables:<br>VaphiVaphiSt2_B_A_FDSW21<br>0055054-2r | G | 438 | 438 | 1 | A -> G | 607 | SNP<br>(transition)   | 59.10% |           | 0 |
| Variables:<br>VaphiVaphiSt2_B_A_FDSW21<br>0055054-2r | A | 456 | 456 | 1 | G -> A | 598 | SNP<br>(transition)   | 55.20% |           | 0 |
| Variables:<br>VaphiVaphiSt2_B_A_FDSW21<br>0055054-2r | C | 462 | 462 | 1 | T -> C | 595 | SNP<br>(transition)   | 27.10% | 1.90E-238 |   |
| Variables:<br>VaphiVaphiSt2_B_A_FDSW21<br>0055054-2r | G | 469 | 469 | 1 | C -> G | 602 | SNP<br>(transversion) | 31.90% |           | 0 |
| Variables:<br>VaphiVaphiSt2_B_A_FDSW21<br>0055054-2r | C | 489 | 489 | 1 | T -> C | 644 | SNP<br>(transition)   | 48.90% |           | 0 |
| Variables:<br>VaphiVaphiSt2_B_A_FDSW21<br>0055054-2r | C | 498 | 498 | 1 | G -> C | 635 | SNP<br>(transversion) | 32.10% |           | 0 |
| Variables:<br>VaphiVaphiSt2_B_A_FDSW21<br>0055054-2r | C | 513 | 513 | 1 | T -> C | 637 | SNP<br>(transition)   | 53.20% |           | 0 |
| Variables:<br>VaphiVaphiSt2_B_A_FDSW21<br>0055054-2r | C | 516 | 516 | 1 | T -> C | 631 | SNP<br>(transition)   | 36.10% |           | 0 |
| Variables:<br>VaphiVaphiSt2_B_A_FDSW21<br>0055054-2r | T | 531 | 531 | 1 | C -> T | 627 | SNP<br>(transition)   | 27.00% |           | 0 |
| Variables:<br>VaphiVaphiSt2_B_A_FDSW21<br>0055054-2r | C | 537 | 537 | 1 | G -> C | 615 | SNP<br>(transversion) | 56.30% |           | 0 |
| Variables:<br>VaphiVaphiSt2_B_A_FDSW21<br>0055054-2r | G | 540 | 540 | 1 | A -> G | 614 | SNP<br>(transition)   | 37.60% |           | 0 |
| Variables:<br>VaphiVaphiSt2_B_A_FDSW21<br>0055054-2r | A | 552 | 552 | 1 | T -> A | 594 | SNP<br>(transversion) | 32.50% |           | 0 |
| Variables:<br>VaphiVaphiSt2_B_A_FDSW21<br>0055054-2r | A | 564 | 564 | 1 | C -> A | 589 | SNP<br>(transversion) | 27.80% | 1.00E-277 |   |
| Variables:<br>VaphiVaphiSt2_B_A_FDSW21<br>0055054-2r | G | 588 | 588 | 1 | A -> G | 580 | SNP<br>(transition)   | 32.60% |           |   |

|                                                 |     |     |     |   |            |               |                       |                   |           |        |                          |                      |             |            |
|-------------------------------------------------|-----|-----|-----|---|------------|---------------|-----------------------|-------------------|-----------|--------|--------------------------|----------------------|-------------|------------|
| Variants:<br>VaphiVaphiSt2_B_A_FDSW210055054-2r | GAG | 658 | 660 | 3 | CTT -> GAG | 329 -><br>338 | Substitution          | 37.6% -><br>38.3% | 1.40E-291 |        |                          |                      |             |            |
| Variants:<br>VaphiVaphiSt2_B_A_FDSW210055054-2r | C   | 663 | 663 | 1 | T -> C     | 321           | SNP<br>(transition)   | 47.70%            | 0         |        |                          |                      |             |            |
| Variants:<br>VaphiVaphiSt2_B_A_FDSW210055054-2r | G   | 677 | 677 | 1 | A -> G     | 265           | SNP<br>(transition)   | 44.20%            | 4.50E-239 |        |                          |                      |             |            |
| Variants:<br>VaphiVaphiSt2_B_A_FDSW210055054-2r | C   | 684 | 684 | 1 | T -> C     | 239           | SNP<br>(transition)   | 33.90%            | 2.30E-154 |        |                          |                      |             |            |
| Variants:<br>VaphiVaphiSt2_B_A_FDSW210055054-2r | A   | 687 | 687 | 1 | G -> A     | 225           | SNP<br>(transition)   | 32.90%            | 6.10E-118 |        |                          |                      |             |            |
| Variants:<br>VaphiVaphiSt2_B_A_FDSW210055054-2r | T   | 690 | 690 | 1 | A -> T     | 214           | SNP<br>(transversion) | 36.90%            | 1.90E-138 |        |                          |                      |             |            |
| Variants:<br>VaphiVaphiSt2_B_A_FDSW210055054-2r | A   | 693 | 693 | 1 | G -> A     | 206           | SNP<br>(transition)   | 35.00%            | 7.90E-103 |        |                          |                      |             |            |
| Variants:<br>VaphiVaphiSt2_B_A_FDSW210055054-2r | A   | 708 | 708 | 1 | G -> A     | 165           | SNP<br>(transition)   | 28.50%            | 1.40E-53  |        |                          |                      |             |            |
| Variants:<br>VaphiVaphiSt2_B_A_FDSW210055054-2r | T   | 723 | 723 | 1 | C -> T     | 125           | SNP<br>(transition)   | 36.00%            | 1.30E-65  |        |                          |                      |             |            |
| Variants:<br>VaphiVaphiSt2_B_A_FDSW210055054-2r | C   | 726 | 726 | 1 | T -> C     | 109           | SNP<br>(transition)   | 33.90%            | 9.60E-57  |        |                          |                      |             |            |
| Variants:<br>VaphiVaphiSt2_B_A_FDSW210055054-2r | GAC | 744 | 746 | 3 | AGA -> GAC | 34 -><br>37   | Substitution          | 29.7% -><br>44.4% | 2.70E-30  |        |                          |                      |             |            |
| Variants:<br>VaphiVaphiSt2_B_A_FDSW210055054-2r | C   | 747 | 747 | 1 | T -> C     | 32            | SNP<br>(transition)   | 37.50%            | 8.70E-25  |        |                          |                      |             |            |
| Variants:<br>VaphiVaphiSt2_B_A_FDSW210055054-2r | C   | 749 | 749 | 1 | T -> C     | 30            | SNP<br>(transition)   | 30.00%            | 8.80E-19  |        |                          |                      |             |            |
| Variants:<br>VaphiVaphiSt2_B_A_FDSW210055054-2r | C   | 750 | 750 | 1 | A -> C     | 30            | SNP<br>(transversion) | 36.70%            | 2.20E-30  |        |                          |                      |             |            |
| Variants:<br>VaphiVaphiSt2_B_A_FDSW210055054-2r | G   | 750 | 750 | 1 | A -> G     | 30            | SNP<br>(transition)   | 30.00%            | 3.30E-15  |        |                          |                      |             |            |
| Variants:<br>VaphiVaphiSt2_B_A_FDSW210055054-2r | T   | 751 | 751 | 1 | C -> T     | 32            | SNP<br>(transition)   | 25.00%            | 9.80E-14  |        |                          |                      |             |            |
| Variants:<br>VaphiVaphiSt2_B_A_FDSW210055054-2r | C   | 756 | 756 | 1 | G -> C     | 35            | SNP<br>(transversion) | 54.30%            | 6.40E-52  |        |                          |                      |             |            |
| Variants:<br>VaphiVaphiSt2_B_A_FDSW210055054-2r | A   | 768 | 768 | 1 | T -> A     | 52            | SNP<br>(transversion) | 57.70%            | 2.70E-82  |        |                          |                      |             |            |
| Variants:<br>VaphiVaphiSt2_B_A_FDSW210055054-2r | T   | 790 | 790 | 1 | G -> T     | 120           | SNP<br>(transversion) | 26.70%            | 8.10E-71  | R -> L | hypothetical protein CDS | hypothetical protein | Substituted | KLI69879.1 |
| Variants:<br>VaphiVaphiSt2_B_A_FDSW210055054-2r | A   | 795 | 795 | 1 | G -> A     | 140           | SNP<br>(transition)   | 57.90%            | 2.00E-195 | A -> T | hypothetical protein CDS | hypothetical protein | Substituted | KLI69879.1 |
| Variants:<br>VaphiVaphiSt2_B_A_FDSW210055054-2r | AAT | 801 | 803 | 2 | CAC -> AAT | 154 -><br>159 | Substitution          | 76.6% -><br>76.7% | 6.00E-273 | H -> N | hypothetical protein CDS | hypothetical protein | Substituted | KLI69879.1 |
| Variants:<br>VaphiVaphiSt2_B_A_FDSW210055054-2r | C   | 834 | 834 | 1 | T -> C     | 233           | SNP<br>(transition)   | 80.30%            | 0         | Y -> H | hypothetical protein CDS | hypothetical protein | Substituted | KLI69879.1 |

|                                                      |      |      |      |   |              |               |                       |                   |           |          |                             |                          |                  |                |
|------------------------------------------------------|------|------|------|---|--------------|---------------|-----------------------|-------------------|-----------|----------|-----------------------------|--------------------------|------------------|----------------|
| Variables:<br>VaphiVaphiSt2_B_A_FDSW21<br>0055054-2r | G    | 888  | 888  | 1 | A -> G       | 361           | SNP<br>(transition)   | 33.20%            | 1.70E-262 | I -> V   | hypothetical<br>protein CDS | hypothetica<br>l protein | Substituti<br>on | KLI69<br>879.1 |
| Variables:<br>VaphiVaphiSt2_B_A_FDSW21<br>0055054-2r | C    | 897  | 897  | 1 | T -> C       | 357           | SNP<br>(transition)   | 61.30%            | 0         | C -> R   | hypothetical<br>protein CDS | hypothetica<br>l protein | Substituti<br>on | KLI69<br>879.1 |
| Variables:<br>VaphiVaphiSt2_B_A_FDSW21<br>0055054-2r | C    | 900  | 900  | 1 | G -> C       | 358           | SNP<br>(transversion) | 61.50%            | 0         | D -> H   | hypothetical<br>protein CDS | hypothetica<br>l protein | Substituti<br>on | KLI69<br>879.1 |
| Variables:<br>VaphiVaphiSt2_B_A_FDSW21<br>0055054-2r | T    | 927  | 927  | 1 | C -> T       | 366           | SNP<br>(transition)   | 26.20%            | 1.40E-179 |          | hypothetical<br>protein CDS | hypothetica<br>l protein | Truncatio<br>n   | KLI69<br>879.1 |
| Variables:<br>VaphiVaphiSt2_B_A_FDSW21<br>0055054-2r | C    | 942  | 942  | 1 | G -> C       | 354           | SNP<br>(transversion) | 34.70%            | 4.40E-235 | G -> R   | hypothetical<br>protein CDS | hypothetica<br>l protein | Substituti<br>on | KLI69<br>879.1 |
| Variables:<br>VaphiVaphiSt2_B_A_FDSW21<br>0055054-2r | TGT  | 966  | 968  | 2 | AGC -> TGT   | 334 -><br>338 | Substitution          | 45.0% -><br>45.8% | 1.50E-269 | S -> C   | hypothetical<br>protein CDS | hypothetica<br>l protein | Substituti<br>on | KLI69<br>879.1 |
| Variables:<br>VaphiVaphiSt2_B_A_FDSW21<br>0055054-2r | G    | 969  | 969  | 1 | C -> G       | 333           | SNP<br>(transversion) | 29.10%            | 5.30E-148 | P -> A   | hypothetical<br>protein CDS | hypothetica<br>l protein | Substituti<br>on | KLI69<br>879.1 |
| Variables:<br>VaphiVaphiSt2_B_A_FDSW21<br>0055054-2r | A    | 976  | 976  | 1 | T -> A       | 340           | SNP<br>(transversion) | 27.90%            | 3.10E-124 | V -> E   | hypothetical<br>protein CDS | hypothetica<br>l protein | Substituti<br>on | KLI69<br>879.1 |
| Variables:<br>VaphiVaphiSt2_B_A_FDSW21<br>0055054-2r | A    | 1008 | 1008 | 1 | G -> A       | 304           | SNP<br>(transition)   | 31.30%            | 3.00E-120 | V -> I   | hypothetical<br>protein CDS | hypothetica<br>l protein | Substituti<br>on | KLI69<br>879.1 |
| Variables:<br>VaphiVaphiSt2_B_A_FDSW21<br>0055054-2r | C    | 1035 | 1035 | 1 | G -> C       | 329           | SNP<br>(transversion) | 25.80%            | 4.20E-150 | G -> R   | hypothetical<br>protein CDS | hypothetica<br>l protein | Substituti<br>on | KLI69<br>879.1 |
| Variables:<br>VaphiVaphiSt2_B_A_FDSW21<br>0055054-2r | A    | 1041 | 1041 | 1 | G -> A       | 338           | SNP<br>(transition)   | 32.20%            | 2.00E-193 | A -> T   | hypothetical<br>protein CDS | hypothetica<br>l protein | Substituti<br>on | KLI69<br>879.1 |
| Variables:<br>VaphiVaphiSt2_B_A_FDSW21<br>0055054-2r | C    | 1049 | 1049 | 1 | T -> C       | 355           | SNP<br>(transition)   | 26.20%            | 5.90E-174 |          | hypothetical<br>protein CDS | hypothetica<br>l protein | None             | KLI69<br>879.1 |
| Variables:<br>VaphiVaphiSt2_B_A_FDSW21<br>0055054-2r | G    | 1083 | 1083 | 1 | A -> G       | 368           | SNP<br>(transition)   | 33.20%            | 7.70E-279 | K -> E   | hypothetical<br>protein CDS | hypothetica<br>l protein | Substituti<br>on | KLI69<br>879.1 |
| Variables:<br>VaphiVaphiSt2_B_A_FDSW21<br>0055054-2r | A    | 1100 | 1100 | 1 | G -> A       | 371           | SNP<br>(transition)   | 33.70%            | 3.40E-299 |          | hypothetical<br>protein CDS | hypothetica<br>l protein | None             | KLI69<br>879.1 |
| Variables:<br>VaphiVaphiSt2_B_A_FDSW21<br>0055054-2r | A    | 1101 | 1101 | 1 | G -> A       | 370           | SNP<br>(transition)   | 32.70%            | 7.20E-300 |          |                             |                          |                  |                |
| Variables:<br>VaphiVaphiSt2_B_A_FDSW21<br>0055054-2r | C    | 1104 | 1104 | 1 | G -> C       | 368           | SNP<br>(transversion) | 35.30%            | 0         |          |                             |                          |                  |                |
| Variables:<br>VaphiVaphiSt2_B_A_FDSW21<br>0055054-2r | T    | 1116 | 1116 | 1 | C -> T       | 377           | SNP<br>(transition)   | 37.90%            | 0         |          | hypothetical<br>protein CDS | hypothetica<br>l protein | None             | KLI69<br>880.1 |
| Variables:<br>VaphiVaphiSt2_B_A_FDSW21<br>0055054-2r | T    | 1119 | 1119 | 1 | C -> T       | 378           | SNP<br>(transition)   | 36.50%            | 0         |          | hypothetical<br>protein CDS | hypothetica<br>l protein | None             | KLI69<br>880.1 |
| Variables:<br>VaphiVaphiSt2_B_A_FDSW21<br>0055054-2r | G    | 1135 | 1135 | 1 | T -> G       | 392           | SNP<br>(transversion) | 59.20%            | 0         | F -> V   | hypothetical<br>protein CDS | hypothetica<br>l protein | Substituti<br>on | KLI69<br>880.1 |
| Variables:<br>VaphiVaphiSt2_B_A_FDSW21<br>0055054-2r | TGTG | 1173 | 1176 | 3 | CATA -> TGTG | 361 -><br>364 | Substitution          | 37.6% -><br>38.6% | 0         | TI -> TV | hypothetical<br>protein CDS | hypothetica<br>l protein | Substituti<br>on | KLI69<br>880.1 |
| Variables:<br>VaphiVaphiSt2_B_A_FDSW21<br>0055054-2r | C    | 1182 | 1182 | 1 | T -> C       | 359           | SNP<br>(transition)   | 37.90%            | 0         |          | hypothetical<br>protein CDS | hypothetica<br>l protein | None             | KLI69<br>880.1 |
| Variables:<br>VaphiVaphiSt2_B_A_FDSW21<br>0055054-2r | G    | 1215 | 1215 | 1 | A -> G       | 298           | SNP<br>(transition)   | 50.00%            | 0         |          | hypothetical<br>protein CDS | hypothetica<br>l protein | None             | KLI69<br>880.1 |



|                                                  |        |      |      |   |                  |               |                       |                   |           |          |                             |                          |                  |                |
|--------------------------------------------------|--------|------|------|---|------------------|---------------|-----------------------|-------------------|-----------|----------|-----------------------------|--------------------------|------------------|----------------|
| Variables:<br>VaphiVaphiSt2_B_A_FDSW210055054-2r | G      | 1218 | 1218 | 1 | A -> G           | 292           | SNP<br>(transition)   | 40.80%            | 0         |          | hypothetical<br>protein CDS | hypothetica<br>l protein | None             | KLI69<br>880.1 |
| Variables:<br>VaphiVaphiSt2_B_A_FDSW210055054-2r | G      | 1221 | 1221 | 1 | C -> G           | 287           | SNP<br>(transversion) | 40.10%            | 1.2E-320  |          | hypothetical<br>protein CDS | hypothetica<br>l protein | None             | KLI69<br>880.1 |
| Variables:<br>VaphiVaphiSt2_B_A_FDSW210055054-2r | GG     | 1232 | 1233 | 2 | AC -> GG         | 250 -><br>255 | Substitution          | 36.9% -><br>37.6% | 6.10E-263 | N -> R   | hypothetical<br>protein CDS | hypothetica<br>l protein | Substituti<br>on | KLI69<br>880.1 |
| Variables:<br>VaphiVaphiSt2_B_A_FDSW210055054-2r | T      | 1235 | 1235 | 1 | C -> T           | 245           | SNP<br>(transition)   | 37.60%            | 1.30E-253 | A -> V   | hypothetical<br>protein CDS | hypothetica<br>l protein | Substituti<br>on | KLI69<br>880.1 |
| Variables:<br>VaphiVaphiSt2_B_A_FDSW210055054-2r | G      | 1269 | 1269 | 1 | A -> G           | 160           | SNP<br>(transition)   | 46.90%            | 2.00E-201 | I -> M   | hypothetical<br>protein CDS | hypothetica<br>l protein | Substituti<br>on | KLI69<br>880.1 |
| Variables:<br>VaphiVaphiSt2_B_A_FDSW210055054-2r | G      | 1275 | 1275 | 1 | A -> G           | 142           | SNP<br>(transition)   | 47.20%            | 4.60E-187 |          | hypothetical<br>protein CDS | hypothetica<br>l protein | None             | KLI69<br>880.1 |
| Variables:<br>VaphiVaphiSt2_B_A_FDSW210055054-2r | G      | 1302 | 1302 | 1 | A -> G           | 84            | SNP<br>(transition)   | 29.80%            | 4.80E-67  |          | hypothetical<br>protein CDS | hypothetica<br>l protein | None             | KLI69<br>880.1 |
| Variables:<br>VaphiVaphiSt2_B_A_FDSW210055054-2r | AAGTT  | 1324 | 1328 | 4 | CACAC -> AAGTT   | 54 -><br>58   | Substitution          | 83.3% -><br>86.2% | 1.00E-142 | HT -> KF | hypothetical<br>protein CDS | hypothetica<br>l protein | Substituti<br>on | KLI69<br>880.1 |
| Variables:<br>VaphiVaphiSt2_B_A_FDSW210055054-2r | AGTGCC | 1330 | 1335 | 5 | TTAACA -> AGTGCC | 48 -><br>51   | Substitution          | 77.1% -><br>84.3% | 7.10E-120 | LT -> SA | hypothetical<br>protein CDS | hypothetica<br>l protein | Substituti<br>on | KLI69<br>880.1 |
| Variables:<br>VaphiVaphiSt2_B_A_FDSW210055054-2r | TCGCT  | 1339 | 1343 | 5 | CGTTA -> TCGCT   | 36 -><br>45   | Substitution          | 38.6% -><br>45.5% | 5.50E-45  |          | hypothetical<br>protein CDS | hypothetica<br>l protein | Extension        | KLI69<br>880.1 |
| Variables:<br>VaphiVaphiSt2_B_A_FDSW210055054-2r | T      | 1345 | 1345 | 1 | G -> T           | 34            | SNP<br>(transversion) | 41.20%            | 5.50E-42  |          |                             |                          |                  |                |
| Variables:<br>VaphiVaphiSt2_B_A_FDSW210055054-2r | TT     | 1347 | 1348 | 2 | AA -> TT         | 38 -><br>39   | Substitution          | 39.5% -><br>41.0% | 1.50E-41  |          |                             |                          |                  |                |
| Variables:<br>VaphiVaphiSt2_B_A_FDSW210055054-2r | AAT    | 1351 | 1353 | 3 | GGA -> AAT       | 37 -><br>40   | Substitution          | 29.7% -><br>35.0% | 1.70E-32  |          |                             |                          |                  |                |
| Variables:<br>VaphiVaphiSt2_B_A_FDSW210055054-2r | AA     | 2117 | 2118 | 2 | TT -> AA         | 32            | Substitution          | 25.00%            | 4.10E-20  |          | hypothetical<br>protein CDS | hypothetica<br>l protein | Truncatio<br>n   | KLI69<br>881.1 |
| Variables:<br>VaphiVaphiSt2_B_A_FDSW210055054-2r | G      | 2121 | 2121 | 1 | A -> G           | 33            | SNP<br>(transition)   | 30.30%            | 9.20E-28  |          | hypothetical<br>protein CDS | hypothetica<br>l protein | None             | KLI69<br>881.1 |
| Variables:<br>VaphiVaphiSt2_B_A_FDSW210055054-2r | GATGA  | 2122 | 2126 | 4 | AAAAAT -> GATGA  | 35 -><br>38   | Substitution          | 25.7% -><br>31.6% | 3.50E-26  | KI -> DD | hypothetical<br>protein CDS | hypothetica<br>l protein | Substituti<br>on | KLI69<br>881.1 |
| Variables:<br>VaphiVaphiSt2_B_A_FDSW210055054-2r | AA     | 2128 | 2129 | 2 | GC -> AA         | 36 -><br>37   | Substitution          | 36.1% -><br>37.8% | 4.30E-37  | A -> N   | hypothetical<br>protein CDS | hypothetica<br>l protein | Substituti<br>on | KLI69<br>881.1 |
| Variables:<br>VaphiVaphiSt2_B_A_FDSW210055054-2r | CAC    | 2131 | 2133 | 2 | TAA -> CAC       | 33 -><br>36   | Substitution          | 38.9% -><br>42.4% | 2.00E-42  |          | hypothetical<br>protein CDS | hypothetica<br>l protein | Extension        | KLI69<br>881.1 |
| Variables:<br>VaphiVaphiSt2_B_A_FDSW210055054-2r | T      | 2135 | 2135 | 1 | A -> T           | 35            | SNP<br>(transversion) | 42.90%            | 3.20E-42  |          |                             |                          |                  |                |
| Variables:<br>VaphiVaphiSt2_B_A_FDSW210055054-2r | CTG    | 2137 | 2139 | 3 | AGC -> CTG       | 40            | Substitution          | 45.00%            | 4.50E-49  |          |                             |                          |                  |                |
| Variables:<br>VaphiVaphiSt2_B_A_FDSW210055054-2r | AG     | 2141 | 2142 | 2 | TT -> AG         | 39 -><br>40   | Substitution          | 45.0% -><br>46.2% | 1.10E-50  |          |                             |                          |                  |                |
| Variables:<br>VaphiVaphiSt2_B_A_FDSW210055054-2r | G      | 2144 | 2144 | 1 | A -> G           | 39            | SNP<br>(transition)   | 25.60%            | 6.30E-25  |          |                             |                          |                  |                |

|              |          |                |           |
|--------------|----------|----------------|-----------|
| SNP          | 39       | 71.80%         | 1.10E-86  |
| SNP          | 36       | 27.80%         | 2.50E-26  |
| SNP          | 37       | 29.70%         | 3.40E-29  |
| SNP          | 37       | 48.60%         | 1.10E-51  |
| Insertion    | 37       | 48.60%         | 7.00E-50  |
| Substitution | 16 -> 17 | 62.5% -> 64.7% | 7.60E-17  |
| Substitution | 14       | 50.0% -> 57.1% | 1.90E-08  |
| Deletion     | 181      | 40.30%         | 6.50E-67  |
| SNP          | 181      | 43.60%         | 1.60E-232 |
| SNP          | 168      | 57.10%         | 1.00E-297 |
| SNP          | 174      | 38.50%         | 4.40E-186 |
| SNP          | 173      | 39.90%         | 8.10E-200 |
| SNP          | 164      | 56.10%         | 4.20E-275 |
| SNP          | 163      | 41.10%         | 1.70E-188 |
| SNP          | 117      | 30.80%         | 7.10E-93  |
| SNP          | 24       | 100.00%        | 1.00E-72  |
| SNP          | 24       | 83.30%         | 1.10E-62  |
| SNP          | 24       | 100.00%        | 1.60E-77  |
| SNP          | 24       | 100.00%        | 4.00E-75  |
| Substitution | 20 -> 22 | 100.00%        | 1.00E-64  |
| Deletion     | 15 -> 19 | 89.5% -> 94.1% | 3.20E-23  |
| SNP          | 14       | 100.00%        | 4.00E-44  |

|                                                 |            |      |      |   |                          |            |                    |                |          |              |                          |                      |                  |            |  |  |
|-------------------------------------------------|------------|------|------|---|--------------------------|------------|--------------------|----------------|----------|--------------|--------------------------|----------------------|------------------|------------|--|--|
| Variants:<br>VaphiVaphiSt2_B_A_FDSW210055054-2r | GTTTAA     | 4043 | 4048 | 6 | ACCGTT -> GTTTAA         | 4 -> 10    | Substitution       | 100.00%        | 2.50E-12 |              |                          |                      |                  |            |  |  |
| Variants:<br>VaphiVaphiSt2_B_A_FDSW210055054-2r | GTGG       | 4050 | 4053 | 4 | CGCT -> GTGG             | 3          | Substitution       | 100.00%        | 7.90E-09 |              |                          |                      |                  |            |  |  |
| Variants:<br>VaphiVaphiSt2_B_A_FDSW210055054-2r | AG         | 4336 | 4337 | 2 | TC -> AG                 | 12 -> 15   | Substitution       | 100.00%        | 4.00E-09 | D -> L       | hypothetical protein CDS | hypothetical protein | Substitution     | KLI69882.1 |  |  |
| Variants:<br>VaphiVaphiSt2_B_A_FDSW210055054-2r | AGGTA      | 4339 | 4343 | 4 | TTATC -> AGGTA           | 17 -> 21   | Substitution       | 94.1% -> 95.2% | 4.00E-17 | DK -> YL     | hypothetical protein CDS | hypothetical protein | Substitution     | KLI69882.1 |  |  |
| Variants:<br>VaphiVaphiSt2_B_A_FDSW210055054-2r |            | 4345 | 4346 | 2 | #NAME?                   | 22         | Deletion           | 100.00%        | 6.30E-14 |              | hypothetical protein CDS | hypothetical protein | Frame Shift      | KLI69882.1 |  |  |
| Variants:<br>VaphiVaphiSt2_B_A_FDSW210055054-2r | T          | 4349 | 4349 | 1 | C -> T                   | 27         | SNP (transition)   | 100.00%        | 3.20E-41 | E -> K       | hypothetical protein CDS | hypothetical protein | Substitution     | KLI69882.1 |  |  |
| Variants:<br>VaphiVaphiSt2_B_A_FDSW210055054-2r | ACCA       | 4369 | 4372 | 4 | TGGC -> ACCA             | 123 -> 146 | Substitution       | 100.00%        | 0        | GQ -> VV     | hypothetical protein CDS | hypothetical protein | Substitution     | KLI69882.1 |  |  |
| Variants:<br>VaphiVaphiSt2_B_A_FDSW210055054-2r | TT         | 4374 | 4375 | 2 | GA -> TT                 | 159 -> 168 | Substitution       | 100.00%        | 0        | I -> K       | hypothetical protein CDS | hypothetical protein | Substitution     | KLI69882.1 |  |  |
| Variants:<br>VaphiVaphiSt2_B_A_FDSW210055054-2r | TGGTTCATGA | 4378 | 4387 | 9 | GCTTGGTGCT -> TGGTTCATGA | 189 -> 238 | Substitution       | 91.2% -> 99.5% | 0        | EHQA -> VMNH | hypothetical protein CDS | hypothetical protein | Substitution     | KLI69882.1 |  |  |
| Variants:<br>VaphiVaphiSt2_B_A_FDSW210055054-2r | T          | 4389 | 4389 | 1 | A -> T                   | 243        | SNP (transversion) | 100.00%        | 0        |              | hypothetical protein CDS | hypothetical protein | None             | KLI69882.1 |  |  |
| Variants:<br>VaphiVaphiSt2_B_A_FDSW210055054-2r | G          | 4392 | 4392 | 1 | C -> G                   | 258        | SNP (transversion) | 99.60%         | 0        |              | hypothetical protein CDS | hypothetical protein | None             | KLI69882.1 |  |  |
| Variants:<br>VaphiVaphiSt2_B_A_FDSW210055054-2r | G          | 4395 | 4395 | 1 | A -> G                   | 272        | SNP (transition)   | 99.60%         | 0        |              | hypothetical protein CDS | hypothetical protein | None             | KLI69882.1 |  |  |
| Variants:<br>VaphiVaphiSt2_B_A_FDSW210055054-2r | GTCGTA     | 4398 | 4403 | 6 | CGTCAC -> GTCGTA         | 291 -> 322 | Substitution       | 99.3% -> 99.4% | 0        | MT -> YD     | hypothetical protein CDS | hypothetical protein | Start Codon Loss | KLI69882.1 |  |  |
| Variants:<br>VaphiVaphiSt2_B_A_FDSW210055054-2r | ACA        | 4404 | 4406 | 3 | GTT -> ACA               | 329 -> 341 | Substitution       | 99.70%         | 0        |              |                          |                      |                  |            |  |  |
| Variants:<br>VaphiVaphiSt2_B_A_FDSW210055054-2r | GT         | 4409 | 4410 | 2 | TC -> GT                 | 356 -> 359 | Substitution       | 100.00%        | 0        |              |                          |                      |                  |            |  |  |
| Variants:<br>VaphiVaphiSt2_B_A_FDSW210055054-2r | GC         | 4414 | 4415 | 2 | CT -> GC                 | 384 -> 388 | Substitution       | 100.00%        | 0        |              |                          |                      |                  |            |  |  |
| Variants:<br>VaphiVaphiSt2_B_A_FDSW210055054-2r | A          | 4417 | 4417 | 1 | G -> A                   | 400        | SNP (transition)   | 99.50%         | 0        |              |                          |                      |                  |            |  |  |
| Variants:<br>VaphiVaphiSt2_B_A_FDSW210055054-2r | GG         | 4419 | 4420 | 2 | CA -> GG                 | 412 -> 416 | Substitution       | 99.80%         | 0        |              |                          |                      |                  |            |  |  |
| Variants:<br>VaphiVaphiSt2_B_A_FDSW210055054-2r | AC         | 4423 | 4424 | 2 | GA -> AC                 | 433 -> 442 | Substitution       | 99.30%         | 0        |              |                          |                      |                  |            |  |  |
| Variants:<br>VaphiVaphiSt2_B_A_FDSW210055054-2r | G          | 4427 | 4426 | 0 | #NAME?                   | 467        | Insertion          | 99.80%         | 0        |              |                          |                      |                  |            |  |  |
| Variants:<br>VaphiVaphiSt2_B_A_FDSW210055054-2r | TG         | 4431 | 4432 | 2 | GA -> TG                 | 498 -> 505 | Substitution       | 99.80%         | 0        |              |                          |                      |                  |            |  |  |
| Variants:<br>VaphiVaphiSt2_B_A_FDSW210055054-2r | A          | 4434 | 4433 | 0 | #NAME?                   | 510        | Insertion          | 100.00%        | 0        |              |                          |                      |                  |            |  |  |

| Variant:                           | CA  | 4435 | 4436 | 2 | GT -> CA     | 520 -><br>524 | Substitution              | 100.00%           | 0         |
|------------------------------------|-----|------|------|---|--------------|---------------|---------------------------|-------------------|-----------|
| VaphiVaphiSt2_B_A_FDSW210055054-2r |     |      |      |   |              |               |                           |                   |           |
| Variant:                           |     |      |      |   |              |               |                           |                   |           |
| VaphiVaphiSt2_B_A_FDSW210055054-2r | A   | 4668 | 4668 | 1 | G -> A       | 452           | SNP (transition)          | 25.90%            | 1.10E-287 |
| Variant:                           |     |      |      |   |              |               |                           |                   |           |
| VaphiVaphiSt2_B_A_FDSW210055054-2r | A   | 4973 | 4973 | 1 | G -> A       | 93            | SNP (transition)          | 61.30%            | 2.40E-174 |
| Variant:                           |     |      |      |   |              |               |                           |                   |           |
| VaphiVaphiSt2_B_A_FDSW210055054-2r | C   | 4975 | 4974 | 0 | +C           | 88            | Insertion                 | 94.30%            | 4.90E-267 |
| Variant:                           |     |      |      |   |              |               |                           |                   |           |
| VaphiVaphiSt2_B_A_FDSW210055054-2r | G   | 4975 | 4974 | 0 | #NAME?       | 86            | Insertion                 | 54.70%            | 2.90E-145 |
| Variant:                           |     |      |      |   |              |               |                           |                   |           |
| VaphiVaphiSt2_B_A_FDSW210055054-2r | T   | 4975 | 4974 | 0 | (T)3 -> (T)4 | 86            | Insertion (tandem repeat) | 39.50%            | 3.90E-82  |
| Variant:                           |     |      |      |   |              |               |                           |                   |           |
| VaphiVaphiSt2_B_A_FDSW210055054-2r | AA  | 4975 | 4976 | 2 | TT -> AA     | 84            | Substitution              | 54.80%            | 4.50E-133 |
| Variant:                           |     |      |      |   |              |               |                           |                   |           |
| VaphiVaphiSt2_B_A_FDSW210055054-2r | GAT | 4978 | 4980 | 3 | AGA -> GAT   | 74 -><br>79   | Substitution              | 53.3% -><br>54.4% | 1.40E-123 |
| Variant:                           |     |      |      |   |              |               |                           |                   |           |
| VaphiVaphiSt2_B_A_FDSW210055054-2r | A   | 4981 | 4981 | 1 | G -> A       | 73            | SNP (transition)          | 58.90%            | 6.90E-118 |
| Variant:                           |     |      |      |   |              |               |                           |                   |           |
| VaphiVaphiSt2_B_A_FDSW210055054-2r | C   | 4981 | 4981 | 1 | G -> C       | 73            | SNP (transversion)        | 39.70%            | 4.70E-79  |
| Variant:                           |     |      |      |   |              |               |                           |                   |           |
| VaphiVaphiSt2_B_A_FDSW210055054-2r | AA  | 4982 | 4983 | 2 | TG -> AA     | 71 -><br>72   | Substitution              | 93.0% -><br>93.1% | 1.60E-205 |
| Variant:                           |     |      |      |   |              |               |                           |                   |           |
| VaphiVaphiSt2_B_A_FDSW210055054-2r | C   | 4984 | 4984 | 1 | A -> C       | 72            | SNP (transversion)        | 51.40%            | 3.40E-102 |
| Variant:                           |     |      |      |   |              |               |                           |                   |           |
| VaphiVaphiSt2_B_A_FDSW210055054-2r | A   | 4985 | 4985 | 1 | T -> A       | 72            | SNP (transversion)        | 58.30%            | 4.10E-119 |
| Variant:                           |     |      |      |   |              |               |                           |                   |           |
| VaphiVaphiSt2_B_A_FDSW210055054-2r | C   | 4985 | 4985 | 1 | T -> C       | 72            | SNP (transition)          | 40.30%            | 2.20E-76  |
| Variant:                           |     |      |      |   |              |               |                           |                   |           |
| VaphiVaphiSt2_B_A_FDSW210055054-2r | A   | 4986 | 4986 | 1 | T -> A       | 65            | SNP (transversion)        | 41.50%            | 2.80E-66  |
| Variant:                           |     |      |      |   |              |               |                           |                   |           |
| VaphiVaphiSt2_B_A_FDSW210055054-2r | C   | 4986 | 4986 | 1 | T -> C       | 65            | SNP (transition)          | 56.90%            | 1.50E-104 |
| Variant:                           |     |      |      |   |              |               |                           |                   |           |
| VaphiVaphiSt2_B_A_FDSW210055054-2r | A   | 4988 | 4988 | 1 | G -> A       | 65            | SNP (transition)          | 49.20%            | 8.90E-88  |
| Variant:                           |     |      |      |   |              |               |                           |                   |           |
| VaphiVaphiSt2_B_A_FDSW210055054-2r | C   | 4988 | 4988 | 1 | G -> C       | 65            | SNP (transversion)        | 43.10%            | 3.00E-69  |
| Variant:                           |     |      |      |   |              |               |                           |                   |           |
| VaphiVaphiSt2_B_A_FDSW210055054-2r | A   | 4989 | 4989 | 1 | C -> A       | 65            | SNP (transversion)        | 83.10%            | 1.40E-161 |
| Variant:                           |     |      |      |   |              |               |                           |                   |           |
| VaphiVaphiSt2_B_A_FDSW210055054-2r | AA  | 4992 | 4993 | 2 | CG -> AA     | 58 -><br>61   | Substitution              | 86.2% -><br>88.5% | 1.90E-151 |
| Variant:                           |     |      |      |   |              |               |                           |                   |           |
| VaphiVaphiSt2_B_A_FDSW210055054-2r | A   | 4994 | 4994 | 1 | C -> A       | 58            | SNP (transversion)        | 44.80%            | 8.50E-60  |
| Variant:                           |     |      |      |   |              |               |                           |                   |           |
| VaphiVaphiSt2_B_A_FDSW210055054-2r | A   | 4995 | 4995 | 1 | G -> A       | 57            | SNP (transition)          | 47.40%            | 4.40E-79  |

|              |                |           |
|--------------|----------------|-----------|
| SNP          | 36.80%         | 1.60E-50  |
| SNP          | 38.90%         | 3.20E-53  |
| SNP          | 44.40%         | 3.50E-67  |
| SNP          | 43.40%         | 2.00E-66  |
| SNP          | 37.70%         | 2.00E-48  |
| SNP          | 38.50%         | 1.20E-50  |
| SNP          | 36.50%         | 1.50E-49  |
| SNP          | 71.40%         | 6.70E-101 |
| SNP          | 30.40%         | 2.40E-38  |
| SNP          | 45.70%         | 8.50E-49  |
| SNP          | 25.60%         | 2.30E-28  |
| SNP          | 39.50%         | 4.10E-40  |
| SNP          | 60.50%         | 7.70E-62  |
| Substitution | 39.5% -> 40.0% | 2.30E-33  |
| Substitution | 46.90%         | 5.60E-37  |
| SNP          | 44.80%         | 5.20E-28  |
| Substitution | 38.5% -> 42.9% | 5.20E-23  |
| SNP          | 28.60%         | 1.20E-16  |
| Substitution | 27.6% -> 32.1% | 4.20E-18  |
| SNP          | 100.00%        | 1.60E-119 |
| SNP          | 100.00%        | 1.60E-109 |
| Substitution | 100.00%        | 1.60E-109 |

174

|                                                 |      |      |      |   |              |             |                       |                   |           |
|-------------------------------------------------|------|------|------|---|--------------|-------------|-----------------------|-------------------|-----------|
| Variants:<br>VaphiVaphiSt2_B_A_FDSW210055054-2r | C    | 5653 | 5653 | 1 | G -> C       | 76          | SNP<br>(transversion) | 27.60%            | 2.00E-20  |
| Variants:<br>VaphiVaphiSt2_B_A_FDSW210055054-2r | T    | 5653 | 5653 | 1 | G -> T       | 76          | SNP<br>(transversion) | 42.10%            | 5.50E-53  |
| Variants:<br>VaphiVaphiSt2_B_A_FDSW210055054-2r | GC   | 5658 | 5657 | 0 | #NAME?       | 100         | Insertion             | 28.00%            | 2.40E-43  |
| Variants:<br>VaphiSt2_B_FDSW210055056-1r        | TGGT | 79   | 82   | 4 | CCTG -> TGGT | 88 -><br>93 | Substitution          | 75.0% -><br>80.6% | 1.60E-140 |
| Variants:<br>VaphiSt2_B_FDSW210055056-1r        | G    | 84   | 84   | 1 | A -> G       | 81          | SNP<br>(transition)   | 90.10%            | 2.00E-165 |
| Variants:<br>VaphiSt2_B_FDSW210055056-1r        | G    | 86   | 86   | 1 | C -> G       | 77          | SNP<br>(transversion) | 67.50%            | 2.60E-100 |
| Variants:<br>VaphiSt2_B_FDSW210055056-1r        | G    | 87   | 87   | 1 | A -> G       | 77          | SNP<br>(transition)   | 74.00%            | 1.10E-113 |
| Variants:<br>VaphiSt2_B_FDSW210055056-1r        | GG   | 88   | 89   | 2 | TC -> GG     | 73 -><br>78 | Substitution          | 46.2% -><br>50.7% | 2.80E-61  |
| Variants:<br>VaphiSt2_B_FDSW210055056-1r        | C    | 91   | 91   | 1 | T -> C       | 86          | SNP<br>(transition)   | 37.20%            | 1.10E-47  |
| Variants:<br>VaphiSt2_B_FDSW210055056-1r        | GGA  | 93   | 95   | 3 | CAC -> GGA   | 86 -><br>91 | Substitution          | 25.8% -><br>29.5% | 7.80E-30  |
| Variants:<br>VaphiSt2_B_FDSW210055056-1r        | G    | 96   | 96   | 1 | T -> G       | 90          | SNP<br>(transversion) | 32.20%            | 8.70E-50  |
| Variants:<br>VaphiSt2_B_FDSW210055056-1r        | C    | 102  | 102  | 1 | T -> C       | 102         | SNP<br>(transition)   | 65.70%            | 1.80E-107 |
| Variants:<br>VaphiSt2_B_FDSW210055056-1r        | C    | 108  | 108  | 1 | A -> C       | 137         | SNP<br>(transversion) | 32.10%            | 1.50E-61  |
| Variants:<br>VaphiSt2_B_FDSW210055056-1r        | G    | 120  | 120  | 1 | A -> G       | 213         | SNP<br>(transition)   | 60.10%            | 9.60E-171 |
| Variants:<br>VaphiSt2_B_FDSW210055056-1r        | T    | 126  | 126  | 1 | C -> T       | 247         | SNP<br>(transition)   | 30.00%            | 3.10E-85  |
| Variants:<br>VaphiSt2_B_FDSW210055056-1r        | T    | 129  | 129  | 1 | C -> T       | 264         | SNP<br>(transition)   | 87.90%            | 0         |
| Variants:<br>VaphiSt2_B_FDSW210055056-1r        | A    | 132  | 132  | 1 | C -> A       | 276         | SNP<br>(transversion) | 27.50%            | 2.20E-62  |
| Variants:<br>VaphiSt2_B_FDSW210055056-1r        | G    | 132  | 132  | 1 | C -> G       | 276         | SNP<br>(transversion) | 54.00%            | 5.20E-292 |
| Variants:<br>VaphiSt2_B_FDSW210055056-1r        | T    | 144  | 144  | 1 | C -> T       | 337         | SNP<br>(transition)   | 31.20%            | 2.90E-153 |
| Variants:<br>VaphiSt2_B_FDSW210055056-1r        | T    | 147  | 147  | 1 | C -> T       | 347         | SNP<br>(transition)   | 50.70%            | 1.20E-215 |
| Variants:<br>VaphiSt2_B_FDSW210055056-1r        | A    | 159  | 159  | 1 | G -> A       | 432         | SNP<br>(transition)   | 84.00%            | 0         |
| Variants:<br>VaphiSt2_B_FDSW210055056-1r        | A    | 165  | 165  | 1 | T -> A       | 470         | SNP<br>(transversion) | 62.60%            | 0         |

|                          |   |     |     |   |        |      |                    |        |   |
|--------------------------|---|-----|-----|---|--------|------|--------------------|--------|---|
| Variants:                |   |     |     |   |        |      |                    |        |   |
| VaphiSt2_B_FDSW210055056 |   |     |     |   |        |      |                    |        |   |
| -1r                      | A | 183 | 183 | 1 | G -> A | 607  | SNP (transition)   | 41.00% | 0 |
| Variants:                |   |     |     |   |        |      |                    |        |   |
| VaphiSt2_B_FDSW210055056 |   |     |     |   |        |      |                    |        |   |
| -1r                      | A | 192 | 192 | 1 | G -> A | 665  | SNP (transition)   | 36.40% | 0 |
| Variants:                |   |     |     |   |        |      |                    |        |   |
| VaphiSt2_B_FDSW210055056 |   |     |     |   |        |      |                    |        |   |
| -1r                      | A | 201 | 201 | 1 | G -> A | 713  | SNP (transition)   | 25.70% | 0 |
| Variants:                |   |     |     |   |        |      |                    |        |   |
| VaphiSt2_B_FDSW210055056 |   |     |     |   |        |      |                    |        |   |
| -1r                      | G | 216 | 216 | 1 | A -> G | 803  | SNP (transition)   | 28.30% | 0 |
| Variants:                |   |     |     |   |        |      |                    |        |   |
| VaphiSt2_B_FDSW210055056 |   |     |     |   |        |      |                    |        |   |
| -1r                      | T | 225 | 225 | 1 | A -> T | 851  | SNP (transversion) | 50.90% | 0 |
| Variants:                |   |     |     |   |        |      |                    |        |   |
| VaphiSt2_B_FDSW210055056 |   |     |     |   |        |      |                    |        |   |
| -1r                      | C | 237 | 237 | 1 | T -> C | 897  | SNP (transition)   | 33.00% | 0 |
| Variants:                |   |     |     |   |        |      |                    |        |   |
| VaphiSt2_B_FDSW210055056 |   |     |     |   |        |      |                    |        |   |
| -1r                      | C | 240 | 240 | 1 | T -> C | 895  | SNP (transition)   | 39.00% | 0 |
| Variants:                |   |     |     |   |        |      |                    |        |   |
| VaphiSt2_B_FDSW210055056 |   |     |     |   |        |      |                    |        |   |
| -1r                      | A | 294 | 294 | 1 | G -> A | 886  | SNP (transition)   | 40.70% | 0 |
| Variants:                |   |     |     |   |        |      |                    |        |   |
| VaphiSt2_B_FDSW210055056 |   |     |     |   |        |      |                    |        |   |
| -1r                      | A | 303 | 303 | 1 | T -> A | 919  | SNP (transversion) | 27.90% | 0 |
| Variants:                |   |     |     |   |        |      |                    |        |   |
| VaphiSt2_B_FDSW210055056 |   |     |     |   |        |      |                    |        |   |
| -1r                      | G | 306 | 306 | 1 | A -> G | 930  | SNP (transition)   | 26.80% | 0 |
| Variants:                |   |     |     |   |        |      |                    |        |   |
| VaphiSt2_B_FDSW210055056 |   |     |     |   |        |      |                    |        |   |
| -1r                      | A | 357 | 357 | 1 | G -> A | 1081 | SNP (transition)   | 55.00% | 0 |
| Variants:                |   |     |     |   |        |      |                    |        |   |
| VaphiSt2_B_FDSW210055056 |   |     |     |   |        |      |                    |        |   |
| -1r                      | G | 363 | 363 | 1 | A -> G | 1099 | SNP (transition)   | 57.40% | 0 |
| Variants:                |   |     |     |   |        |      |                    |        |   |
| VaphiSt2_B_FDSW210055056 |   |     |     |   |        |      |                    |        |   |
| -1r                      | C | 369 | 369 | 1 | T -> C | 1136 | SNP (transition)   | 83.20% | 0 |
| Variants:                |   |     |     |   |        |      |                    |        |   |
| VaphiSt2_B_FDSW210055056 |   |     |     |   |        |      |                    |        |   |
| -1r                      | A | 371 | 371 | 1 | G -> A | 1140 | SNP (transition)   | 56.60% | 0 |
| Variants:                |   |     |     |   |        |      |                    |        |   |
| VaphiSt2_B_FDSW210055056 |   |     |     |   |        |      |                    |        |   |
| -1r                      | G | 387 | 387 | 1 | C -> G | 1231 | SNP (transversion) | 58.60% | 0 |
| Variants:                |   |     |     |   |        |      |                    |        |   |
| VaphiSt2_B_FDSW210055056 |   |     |     |   |        |      |                    |        |   |
| -1r                      | A | 393 | 393 | 1 | G -> A | 1263 | SNP (transition)   | 27.20% | 0 |
| Variants:                |   |     |     |   |        |      |                    |        |   |
| VaphiSt2_B_FDSW210055056 |   |     |     |   |        |      |                    |        |   |
| -1r                      | C | 393 | 393 | 1 | G -> C | 1263 | SNP (transversion) | 46.80% | 0 |
| Variants:                |   |     |     |   |        |      |                    |        |   |
| VaphiSt2_B_FDSW210055056 |   |     |     |   |        |      |                    |        |   |
| -1r                      | C | 396 | 396 | 1 | A -> C | 1293 | SNP (transversion) | 37.50% | 0 |
| Variants:                |   |     |     |   |        |      |                    |        |   |
| VaphiSt2_B_FDSW210055056 |   |     |     |   |        |      |                    |        |   |
| -1r                      | G | 420 | 420 | 1 | A -> G | 1419 | SNP (transition)   | 34.70% | 0 |
| Variants:                |   |     |     |   |        |      |                    |        |   |
| VaphiSt2_B_FDSW210055056 |   |     |     |   |        |      |                    |        |   |
| -1r                      | T | 420 | 420 | 1 | A -> T | 1419 | SNP (transversion) | 32.40% | 0 |
| Variants:                |   |     |     |   |        |      |                    |        |   |
| VaphiSt2_B_FDSW210055056 |   |     |     |   |        |      |                    |        |   |
| -1r                      | A | 422 | 422 | 1 | T -> A | 1418 | SNP (transversion) | 32.50% | 0 |
| Variants:                |   |     |     |   |        |      |                    |        |   |
| VaphiSt2_B_FDSW210055056 |   |     |     |   |        |      |                    |        |   |
| -1r                      | A | 423 | 423 | 1 | G -> A | 1432 | SNP (transition)   | 66.00% | 0 |



|     |      |        |   |
|-----|------|--------|---|
| SNP | 1456 | 65.10% | 0 |
| SNP | 1513 | 50.40% | 0 |
| SNP | 1515 | 51.50% | 0 |
| SNP | 1532 | 26.20% | 0 |
| SNP | 1513 | 43.40% | 0 |
| SNP | 1469 | 27.90% | 0 |
| SNP | 1398 | 51.00% | 0 |
| SNP | 1393 | 33.50% | 0 |
| SNP | 1331 | 27.30% | 0 |
| SNP | 1295 | 53.70% | 0 |
| SNP | 1278 | 34.50% | 0 |
| SNP | 1264 | 33.70% | 0 |
| SNP | 1217 | 27.40% | 0 |
| SNP | 1100 | 34.40% | 0 |
| SNP | 612  | 69.00% | 0 |
| SNP | 509  | 71.90% | 0 |
| SNP | 456  | 70.60% | 0 |
| SNP | 432  | 71.30% | 0 |
| SNP | 418  | 73.20% | 0 |
| SNP | 395  | 74.90% | 0 |
| SNP | 294  | 77.60% | 0 |
| SNP | 209  | 82.30% | 0 |

|                                               |       |      |      |   |                |               |                       |                   |           |        |                             |                          |                  |                |  |  |  |  |  |
|-----------------------------------------------|-------|------|------|---|----------------|---------------|-----------------------|-------------------|-----------|--------|-----------------------------|--------------------------|------------------|----------------|--|--|--|--|--|
| Variables:<br>VaphiSt2_B_FDSW210055056<br>-1r | C     | 726  | 726  | 1 | T -> C         | 191           | SNP<br>(transition)   | 82.70%            | 0         |        |                             |                          |                  |                |  |  |  |  |  |
| Variables:<br>VaphiSt2_B_FDSW210055056<br>-1r | AC    | 745  | 746  | 2 | GA -> AC       | 104 -><br>110 | Substitution          | 29.1% -><br>32.7% | 5.90E-52  |        |                             |                          |                  |                |  |  |  |  |  |
| Variables:<br>VaphiSt2_B_FDSW210055056<br>-1r | C     | 747  | 747  | 1 | T -> C         | 105           | SNP<br>(transition)   | 61.90%            | 1.50E-153 |        |                             |                          |                  |                |  |  |  |  |  |
| Variables:<br>VaphiSt2_B_FDSW210055056<br>-1r | C     | 749  | 749  | 1 | T -> C         | 106           | SNP<br>(transition)   | 50.90%            | 3.60E-121 |        |                             |                          |                  |                |  |  |  |  |  |
| Variables:<br>VaphiSt2_B_FDSW210055056<br>-1r | C     | 750  | 750  | 1 | A -> C         | 107           | SNP<br>(transversion) | 28.00%            | 2.90E-61  |        |                             |                          |                  |                |  |  |  |  |  |
| Variables:<br>VaphiSt2_B_FDSW210055056<br>-1r | G     | 750  | 750  | 1 | A -> G         | 107           | SNP<br>(transition)   | 52.30%            | 2.50E-115 |        |                             |                          |                  |                |  |  |  |  |  |
| Variables:<br>VaphiSt2_B_FDSW210055056<br>-1r | TTCGA | 751  | 755  | 5 | CCTTG -> TTCGA | 98 -><br>108  | Substitution          | 23.5% -><br>40.7% | 6.70E-28  |        |                             |                          |                  |                |  |  |  |  |  |
| Variables:<br>VaphiSt2_B_FDSW210055056<br>-1r | C     | 756  | 756  | 1 | G -> C         | 101           | SNP<br>(transversion) | 47.50%            | 1.70E-115 |        |                             |                          |                  |                |  |  |  |  |  |
| Variables:<br>VaphiSt2_B_FDSW210055056<br>-1r | A     | 768  | 768  | 1 | T -> A         | 149           | SNP<br>(transversion) | 54.40%            | 2.00E-208 |        |                             |                          |                  |                |  |  |  |  |  |
| Variables:<br>VaphiSt2_B_FDSW210055056<br>-1r | T     | 790  | 790  | 1 | G -> T         | 298           | SNP<br>(transversion) | 28.50%            | 9.70E-180 | R -> L | hypothetical<br>protein CDS | hypothetica<br>l protein | Substituti<br>on | KLI69<br>879.1 |  |  |  |  |  |
| Variables:<br>VaphiSt2_B_FDSW210055056<br>-1r | A     | 795  | 795  | 1 | G -> A         | 333           | SNP<br>(transition)   | 51.70%            | 0         | A -> T | hypothetical<br>protein CDS | hypothetica<br>l protein | Substituti<br>on | KLI69<br>879.1 |  |  |  |  |  |
| Variables:<br>VaphiSt2_B_FDSW210055056<br>-1r | AAT   | 801  | 803  | 2 | CAC -> AAT     | 378 -><br>390 | Substitution          | 70.3% -><br>72.5% | 0         | H -> N | hypothetical<br>protein CDS | hypothetica<br>l protein | Substituti<br>on | KLI69<br>879.1 |  |  |  |  |  |
| Variables:<br>VaphiSt2_B_FDSW210055056<br>-1r | C     | 834  | 834  | 1 | T -> C         | 547           | SNP<br>(transition)   | 75.90%            | 0         | Y -> H | hypothetical<br>protein CDS | hypothetica<br>l protein | Substituti<br>on | KLI69<br>879.1 |  |  |  |  |  |
| Variables:<br>VaphiSt2_B_FDSW210055056<br>-1r | G     | 888  | 888  | 1 | A -> G         | 830           | SNP<br>(transition)   | 29.50%            | 0         | I -> V | hypothetical<br>protein CDS | hypothetica<br>l protein | Substituti<br>on | KLI69<br>879.1 |  |  |  |  |  |
| Variables:<br>VaphiSt2_B_FDSW210055056<br>-1r | C     | 897  | 897  | 1 | T -> C         | 844           | SNP<br>(transition)   | 56.50%            | 0         | C -> R | hypothetical<br>protein CDS | hypothetica<br>l protein | Substituti<br>on | KLI69<br>879.1 |  |  |  |  |  |
| Variables:<br>VaphiSt2_B_FDSW210055056<br>-1r | C     | 900  | 900  | 1 | G -> C         | 854           | SNP<br>(transversion) | 56.80%            | 0         | D -> H | hypothetical<br>protein CDS | hypothetica<br>l protein | Substituti<br>on | KLI69<br>879.1 |  |  |  |  |  |
| Variables:<br>VaphiSt2_B_FDSW210055056<br>-1r | C     | 942  | 942  | 1 | G -> C         | 817           | SNP<br>(transversion) | 29.50%            | 0         | G -> R | hypothetical<br>protein CDS | hypothetica<br>l protein | Substituti<br>on | KLI69<br>879.1 |  |  |  |  |  |
| Variables:<br>VaphiSt2_B_FDSW210055056<br>-1r | TGT   | 966  | 968  | 2 | AGC -> TGT     | 788 -><br>795 | Substitution          | 48.5% -><br>48.7% | 0         | S -> C | hypothetical<br>protein CDS | hypothetica<br>l protein | Substituti<br>on | KLI69<br>879.1 |  |  |  |  |  |
| Variables:<br>VaphiSt2_B_FDSW210055056<br>-1r | G     | 969  | 969  | 1 | C -> G         | 799           | SNP<br>(transversion) | 33.90%            | 0         | P -> A | hypothetical<br>protein CDS | hypothetica<br>l protein | Substituti<br>on | KLI69<br>879.1 |  |  |  |  |  |
| Variables:<br>VaphiSt2_B_FDSW210055056<br>-1r | A     | 976  | 976  | 1 | T -> A         | 805           | SNP<br>(transversion) | 33.70%            | 0         | V -> E | hypothetical<br>protein CDS | hypothetica<br>l protein | Substituti<br>on | KLI69<br>879.1 |  |  |  |  |  |
| Variables:<br>VaphiSt2_B_FDSW210055056<br>-1r | A     | 1008 | 1008 | 1 | G -> A         | 751           | SNP<br>(transition)   | 37.40%            | 0         | V -> I | hypothetical<br>protein CDS | hypothetica<br>l protein | Substituti<br>on | KLI69<br>879.1 |  |  |  |  |  |
| Variables:<br>VaphiSt2_B_FDSW210055056<br>-1r | C     | 1035 | 1035 | 1 | G -> C         | 794           | SNP<br>(transversion) | 32.20%            | 0         | G -> R | hypothetical<br>protein CDS | hypothetica<br>l protein | Substituti<br>on | KLI69<br>879.1 |  |  |  |  |  |

|                                               |      |      |      |   |              |               |                       |                   |   |          |                             |                          |                  |                |
|-----------------------------------------------|------|------|------|---|--------------|---------------|-----------------------|-------------------|---|----------|-----------------------------|--------------------------|------------------|----------------|
| Variables:<br>VaphiSt2_B_FDSW210055056<br>-1r | A    | 1041 | 1041 | 1 | G -> A       | 812           | SNP<br>(transition)   | 36.90%            | 0 | A -> T   | hypothetical<br>protein CDS | hypothetica<br>l protein | Substituti<br>on | KLI69<br>879.1 |
| Variables:<br>VaphiSt2_B_FDSW210055056<br>-1r | C    | 1049 | 1049 | 1 | T -> C       | 819           | SNP<br>(transition)   | 30.90%            | 0 |          | hypothetical<br>protein CDS | hypothetica<br>l protein | None             | KLI69<br>879.1 |
| Variables:<br>VaphiSt2_B_FDSW210055056<br>-1r | G    | 1083 | 1083 | 1 | A -> G       | 885           | SNP<br>(transition)   | 37.60%            | 0 | K -> E   | hypothetical<br>protein CDS | hypothetica<br>l protein | Substituti<br>on | KLI69<br>879.1 |
| Variables:<br>VaphiSt2_B_FDSW210055056<br>-1r | A    | 1100 | 1100 | 1 | G -> A       | 921           | SNP<br>(transition)   | 38.00%            | 0 |          | hypothetical<br>protein CDS | hypothetica<br>l protein | None             | KLI69<br>879.1 |
| Variables:<br>VaphiSt2_B_FDSW210055056<br>-1r | A    | 1101 | 1101 | 1 | G -> A       | 926           | SNP<br>(transition)   | 36.50%            | 0 |          |                             |                          |                  |                |
| Variables:<br>VaphiSt2_B_FDSW210055056<br>-1r | C    | 1104 | 1104 | 1 | G -> C       | 933           | SNP<br>(transversion) | 38.30%            | 0 |          |                             |                          |                  |                |
| Variables:<br>VaphiSt2_B_FDSW210055056<br>-1r | T    | 1116 | 1116 | 1 | C -> T       | 929           | SNP<br>(transition)   | 38.40%            | 0 |          | hypothetical<br>protein CDS | hypothetica<br>l protein | None             | KLI69<br>880.1 |
| Variables:<br>VaphiSt2_B_FDSW210055056<br>-1r | T    | 1119 | 1119 | 1 | C -> T       | 928           | SNP<br>(transition)   | 38.50%            | 0 |          | hypothetical<br>protein CDS | hypothetica<br>l protein | None             | KLI69<br>880.1 |
| Variables:<br>VaphiSt2_B_FDSW210055056<br>-1r | G    | 1135 | 1135 | 1 | T -> G       | 943           | SNP<br>(transversion) | 60.40%            | 0 | F -> V   | hypothetical<br>protein CDS | hypothetica<br>l protein | Substituti<br>on | KLI69<br>880.1 |
| Variables:<br>VaphiSt2_B_FDSW210055056<br>-1r | TGTG | 1173 | 1176 | 3 | CATA -> TGTG | 977 -><br>985 | Substitution          | 44.5% -><br>45.8% | 0 | TI -> TV | hypothetical<br>protein CDS | hypothetica<br>l protein | Substituti<br>on | KLI69<br>880.1 |
| Variables:<br>VaphiSt2_B_FDSW210055056<br>-1r | C    | 1182 | 1182 | 1 | T -> C       | 963           | SNP<br>(transition)   | 46.30%            | 0 |          | hypothetical<br>protein CDS | hypothetica<br>l protein | None             | KLI69<br>880.1 |
| Variables:<br>VaphiSt2_B_FDSW210055056<br>-1r | G    | 1194 | 1194 | 1 | A -> G       | 943           | SNP<br>(transition)   | 25.20%            | 0 |          | hypothetical<br>protein CDS | hypothetica<br>l protein | None             | KLI69<br>880.1 |
| Variables:<br>VaphiSt2_B_FDSW210055056<br>-1r | G    | 1215 | 1215 | 1 | A -> G       | 869           | SNP<br>(transition)   | 52.50%            | 0 |          | hypothetical<br>protein CDS | hypothetica<br>l protein | None             | KLI69<br>880.1 |
| Variables:<br>VaphiSt2_B_FDSW210055056<br>-1r | G    | 1218 | 1218 | 1 | A -> G       | 846           | SNP<br>(transition)   | 44.90%            | 0 |          | hypothetical<br>protein CDS | hypothetica<br>l protein | None             | KLI69<br>880.1 |
| Variables:<br>VaphiSt2_B_FDSW210055056<br>-1r | G    | 1221 | 1221 | 1 | C -> G       | 831           | SNP<br>(transversion) | 44.60%            | 0 |          | hypothetical<br>protein CDS | hypothetica<br>l protein | None             | KLI69<br>880.1 |
| Variables:<br>VaphiSt2_B_FDSW210055056<br>-1r | GG   | 1232 | 1233 | 2 | AC -> GG     | 725 -><br>735 | Substitution          | 40.0% -><br>40.6% | 0 | N -> R   | hypothetical<br>protein CDS | hypothetica<br>l protein | Substituti<br>on | KLI69<br>880.1 |
| Variables:<br>VaphiSt2_B_FDSW210055056<br>-1r | T    | 1235 | 1235 | 1 | C -> T       | 706           | SNP<br>(transition)   | 40.50%            | 0 | A -> V   | hypothetical<br>protein CDS | hypothetica<br>l protein | Substituti<br>on | KLI69<br>880.1 |
| Variables:<br>VaphiSt2_B_FDSW210055056<br>-1r | G    | 1269 | 1269 | 1 | A -> G       | 501           | SNP<br>(transition)   | 64.70%            | 0 | I -> M   | hypothetical<br>protein CDS | hypothetica<br>l protein | Substituti<br>on | KLI69<br>880.1 |
| Variables:<br>VaphiSt2_B_FDSW210055056<br>-1r | G    | 1275 | 1275 | 1 | A -> G       | 468           | SNP<br>(transition)   | 66.00%            | 0 |          | hypothetical<br>protein CDS | hypothetica<br>l protein | None             | KLI69<br>880.1 |
| Variables:<br>VaphiSt2_B_FDSW210055056<br>-1r | T    | 1287 | 1287 | 1 | A -> T       | 402           | SNP<br>(transversion) | 52.50%            | 0 |          | hypothetical<br>protein CDS | hypothetica<br>l protein | None             | KLI69<br>880.1 |
| Variables:<br>VaphiSt2_B_FDSW210055056<br>-1r | T    | 1290 | 1290 | 1 | C -> T       | 384           | SNP<br>(transition)   | 51.60%            | 0 |          | hypothetical<br>protein CDS | hypothetica<br>l protein | None             | KLI69<br>880.1 |
| Variables:<br>VaphiSt2_B_FDSW210055056<br>-1r | G    | 1293 | 1293 | 1 | C -> G       | 358           | SNP<br>(transversion) | 52.50%            | 0 | D -> E   | hypothetical<br>protein CDS | hypothetica<br>l protein | Substituti<br>on | KLI69<br>880.1 |

|                                              |                   |      |      |    |                                   |               |                       |                   |           |                   |  |                             |                          |                  |                |
|----------------------------------------------|-------------------|------|------|----|-----------------------------------|---------------|-----------------------|-------------------|-----------|-------------------|--|-----------------------------|--------------------------|------------------|----------------|
| Variants:<br>VaphiSt2_B_FDSW210055056<br>-1r |                   |      |      |    |                                   | 326 -><br>338 |                       | 51.4% -><br>52.1% |           |                   |  | hypothetical<br>protein CDS | hypothetica<br>l protein | Substituti<br>on | KLI69<br>880.1 |
| Variants:<br>VaphiSt2_B_FDSW210055056<br>-1r | ATTG              | 1296 | 1299 | 4  | CAAC -> ATTG                      |               | Substitution          |                   | 0         | TN -> TL          |  |                             |                          |                  |                |
| Variants:<br>VaphiSt2_B_FDSW210055056<br>-1r | A                 | 1305 | 1305 | 1  | G -> A                            | 288           | SNP<br>(transition)   | 50.30%            | 0         |                   |  | hypothetical<br>protein CDS | hypothetica<br>l protein | None             | KLI69<br>880.1 |
| Variants:<br>VaphiSt2_B_FDSW210055056<br>-1r | A                 | 1311 | 1311 | 1  | G -> A                            | 255           | SNP<br>(transition)   | 30.60%            | 8.00E-207 |                   |  | hypothetical<br>protein CDS | hypothetica<br>l protein | None             | KLI69<br>880.1 |
| Variants:<br>VaphiSt2_B_FDSW210055056<br>-1r | T                 | 1314 | 1314 | 1  | G -> T                            | 229           | SNP<br>(transversion) | 29.70%            | 4.10E-159 |                   |  | hypothetical<br>protein CDS | hypothetica<br>l protein | None             | KLI69<br>880.1 |
| Variants:<br>VaphiSt2_B_FDSW210055056<br>-1r | G                 | 1317 | 1317 | 1  | C -> G                            | 215           | SNP<br>(transversion) | 26.50%            | 9.20E-142 | D -> E            |  | hypothetical<br>protein CDS | hypothetica<br>l protein | Substituti<br>on | KLI69<br>880.1 |
| Variants:<br>VaphiSt2_B_FDSW210055056<br>-1r | GCTA              | 1320 | 1323 | 4  | TGAG -> GCTA                      | 179 -><br>202 | Substitution          | 29.7% -><br>33.5% | 6.40E-139 | TE -> TL          |  | hypothetical<br>protein CDS | hypothetica<br>l protein | Substituti<br>on | KLI69<br>880.1 |
| Variants:<br>VaphiSt2_B_FDSW210055056<br>-1r | A                 | 1324 | 1324 | 1  | C -> A                            | 177           | SNP<br>(transversion) | 34.50%            | 5.00E-194 | H -> N            |  | hypothetical<br>protein CDS | hypothetica<br>l protein | Substituti<br>on | KLI69<br>880.1 |
| Variants:<br>VaphiSt2_B_FDSW210055056<br>-1r | AAG               | 1324 | 1326 | 2  | CAC -> AAG                        | 171 -><br>177 | Substitution          | 57.1% -><br>59.1% | 2.7E-315  | H -> K            |  | hypothetical<br>protein CDS | hypothetica<br>l protein | Substituti<br>on | KLI69<br>880.1 |
| Variants:<br>VaphiSt2_B_FDSW210055056<br>-1r | TT                | 1327 | 1328 | 2  | AC -> TT                          | 165 -><br>170 | Substitution          | 57.1% -><br>58.8% | 1.20E-298 | T -> F            |  | hypothetical<br>protein CDS | hypothetica<br>l protein | Substituti<br>on | KLI69<br>880.1 |
| Variants:<br>VaphiSt2_B_FDSW210055056<br>-1r | AGTGCC            | 1330 | 1335 | 5  | TTAACA -> AGTGCC                  | 151 -><br>161 | Substitution          | 53.6% -><br>62.7% | 3.10E-248 | LT -> SA          |  | hypothetical<br>protein CDS | hypothetica<br>l protein | Substituti<br>on | KLI69<br>880.1 |
| Variants:<br>VaphiSt2_B_FDSW210055056<br>-1r | TCG               | 1339 | 1341 | 3  | CGT -> TCG                        | 123 -><br>127 | Substitution          | 36.6% -><br>40.2% | 2.80E-124 | R -> S            |  | hypothetical<br>protein CDS | hypothetica<br>l protein | Substituti<br>on | KLI69<br>880.1 |
| Variants:<br>VaphiSt2_B_FDSW210055056<br>-1r | CT                | 1342 | 1343 | 2  | TA -> CT                          | 115 -><br>120 | Substitution          | 33.3% -><br>34.8% | 1.40E-105 |                   |  | hypothetical<br>protein CDS | hypothetica<br>l protein | Extension        | KLI69<br>880.1 |
| Variants:<br>VaphiSt2_B_FDSW210055056<br>-1r | T                 | 1345 | 1345 | 1  | G -> T                            | 105           | SNP<br>(transversion) | 36.20%            | 5.60E-105 |                   |  |                             |                          |                  |                |
| Variants:<br>VaphiSt2_B_FDSW210055056<br>-1r | TT                | 1347 | 1348 | 2  | AA -> TT                          | 93 -><br>97   | Substitution          | 47.3% -><br>49.5% | 7.00E-128 |                   |  |                             |                          |                  |                |
| Variants:<br>VaphiSt2_B_FDSW210055056<br>-1r | AAT               | 1351 | 1353 | 3  | GGA -> AAT                        | 81 -><br>84   | Substitution          | 34.6% -><br>39.3% | 2.70E-74  |                   |  |                             |                          |                  |                |
| Variants:<br>VaphiSt2_B_FDSW210055056<br>-1r | CCGAAAC<br>GGATGA | 2114 | 2126 | 12 | ATTTTGAAAAAAT -><br>CCGAAACGGATGA | 43 -><br>50   | Substitution          | 20.9% -><br>48.9% | 2.80E-27  | DFEK1 -><br>AETDD |  | hypothetical<br>protein CDS | hypothetica<br>l protein | Substituti<br>on | KLI69<br>881.1 |
| Variants:<br>VaphiSt2_B_FDSW210055056<br>-1r | AA                | 2128 | 2129 | 2  | GC -> AA                          | 50 -><br>52   | Substitution          | 62.0% -><br>63.5% | 9.50E-96  | A -> N            |  | hypothetical<br>protein CDS | hypothetica<br>l protein | Substituti<br>on | KLI69<br>881.1 |
| Variants:<br>VaphiSt2_B_FDSW210055056<br>-1r | CAC               | 2131 | 2133 | 2  | TAA -> CAC                        | 54 -><br>55   | Substitution          | 65.5% -><br>66.7% | 9.30E-115 |                   |  | hypothetical<br>protein CDS | hypothetica<br>l protein | Extension        | KLI69<br>881.1 |
| Variants:<br>VaphiSt2_B_FDSW210055056<br>-1r | T                 | 2135 | 2135 | 1  | A -> T                            | 63            | SNP<br>(transversion) | 68.30%            | 4.20E-135 |                   |  |                             |                          |                  |                |
| Variants:<br>VaphiSt2_B_FDSW210055056<br>-1r | CTG               | 2137 | 2139 | 3  | AGC -> CTG                        | 67 -><br>69   | Substitution          | 63.8% -><br>65.7% | 4.10E-136 |                   |  |                             |                          |                  |                |
| Variants:<br>VaphiSt2_B_FDSW210055056<br>-1r | AG                | 2141 | 2142 | 2  | TT -> AG                          | 73 -><br>77   | Substitution          | 55.8% -><br>58.9% | 3.50E-122 |                   |  |                             |                          |                  |                |
| Variants:<br>VaphiSt2_B_FDSW210055056<br>-1r | AG                | 2143 | 2144 | 2  | TA -> AG                          | 77 -><br>81   | Substitution          | 27.3% -><br>30.9% | 9.90E-58  |                   |  |                             |                          |                  |                |

|                                                                                       |        |      |      |   |                  |             |                       |                   |           |
|---------------------------------------------------------------------------------------|--------|------|------|---|------------------|-------------|-----------------------|-------------------|-----------|
| Variants:<br>VaphiSt2_B_FDSW210055056<br>-1r                                          | G      | 2145 | 2145 | 1 | A -> G           | 81          | SNP<br>(transition)   | 87.70%            | 5.90E-237 |
| Variants:<br>VaphiSt2_B_FDSW210055056<br>-1r                                          | T      | 2146 | 2146 | 1 | G -> T           | 82          | SNP<br>(transversion) | 35.40%            | 4.90E-83  |
| Variants:<br>VaphiSt2_B_FDSW210055056<br>-1r                                          | G      | 2147 | 2147 | 1 | A -> G           | 82          | SNP<br>(transition)   | 36.60%            | 2.20E-74  |
| Variants:<br>VaphiSt2_B_FDSW210055056<br>-1r                                          | T      | 2147 | 2147 | 1 | A -> T           | 82          | SNP<br>(transversion) | 53.70%            | 1.30E-135 |
| Variants:<br>VaphiSt2_B_FDSW210055056<br>-1r                                          | G      | 2149 | 2148 | 0 | #NAME?           | 82          | Insertion             | 53.70%            | 3.40E-131 |
| Variants:<br>VaphiSt2_B_FDSW210055056<br>-1r                                          | GAG    | 2902 | 2904 | 3 | TGA -> GAG       | 20 -><br>21 | Substitution          | 65.0% -><br>75.0% | 9.40E-26  |
| Variants:<br>VaphiSt2_B_FDSW210055056<br>-1r                                          | GGA    | 2906 | 2908 | 3 | TCG -> GGA       | 18 -><br>21 | Substitution          | 50.0% -><br>57.1% | 5.70E-15  |
| Variants:<br>VaphiSt2_B_FDSW210055056<br>-1r                                          | GGGA   | 2910 | 2913 | 4 | AACG -> GGGA     | 16 -><br>18 | Substitution          | 31.3% -><br>44.4% | 4.00E-07  |
| Variants: VaphiSt2_B_FDSW210055056-1r<br>Variants:<br>VaphiSt2_B_FDSW210055056<br>-1r | TTAG   | 3097 | 3097 | 1 | #NAME?           | 366         | Deletion              | 42.10%            | 1.40E-157 |
| Variants:<br>VaphiSt2_B_FDSW210055056<br>-1r                                          | TTAG   | 3449 | 3452 | 4 | GCGT -> TTAG     | 34 -><br>35 | Substitution          | 26.5% -><br>51.4% | 1.70E-08  |
| Variants:<br>VaphiSt2_B_FDSW210055056<br>-1r                                          | G      | 3456 | 3456 | 1 | T -> G           | 40          | SNP<br>(transversion) | 35.00%            | 7.60E-20  |
| Variants:<br>VaphiSt2_B_FDSW210055056<br>-1r                                          | T      | 3659 | 3659 | 1 | G -> T           | 393         | SNP<br>(transversion) | 48.30%            | 0         |
| Variants:<br>VaphiSt2_B_FDSW210055056<br>-1r                                          | C      | 3758 | 3758 | 1 | A -> C           | 339         | SNP<br>(transversion) | 48.10%            | 0         |
| Variants:<br>VaphiSt2_B_FDSW210055056<br>-1r                                          | G      | 3778 | 3778 | 1 | A -> G           | 346         | SNP<br>(transition)   | 52.00%            | 0         |
| Variants:<br>VaphiSt2_B_FDSW210055056<br>-1r                                          | T      | 3780 | 3780 | 1 | C -> T           | 344         | SNP<br>(transition)   | 51.50%            | 0         |
| Variants:<br>VaphiSt2_B_FDSW210055056<br>-1r                                          | C      | 3852 | 3852 | 1 | T -> C           | 376         | SNP<br>(transition)   | 52.40%            | 0         |
| Variants:<br>VaphiSt2_B_FDSW210055056<br>-1r                                          | G      | 3864 | 3864 | 1 | A -> G           | 371         | SNP<br>(transition)   | 48.80%            | 0         |
| Variants:<br>VaphiSt2_B_FDSW210055056<br>-1r                                          | T      | 3922 | 3922 | 1 | C -> T           | 284         | SNP<br>(transition)   | 40.80%            | 7.10E-290 |
| Variants:<br>VaphiSt2_B_FDSW210055056<br>-1r                                          | T      | 4037 | 4037 | 1 | G -> T           | 40          | SNP<br>(transversion) | 70.00%            | 8.10E-50  |
| Variants:<br>VaphiSt2_B_FDSW210055056<br>-1r                                          | AA     | 4047 | 4048 | 2 | TT -> AA         | 28          | Substitution          | 100.00%           | 6.30E-54  |
| Variants:<br>VaphiSt2_B_FDSW210055056<br>-1r                                          | GTGGTA | 4050 | 4055 | 6 | CGCTGC -> GTGGTA | 24 -><br>25 | Substitution          | 100.00%           | 1.00E-48  |
| Variants:<br>VaphiSt2_B_FDSW210055056<br>-1r                                          | GG     | 4059 | 4060 | 2 | TT -> GG         | 23          | Substitution          | 100.00%           | 1.00E-46  |

|                                              |                  |      |      |    |                                 |               |                       |                   |           |          |                             |                          |                        |                |  |  |
|----------------------------------------------|------------------|------|------|----|---------------------------------|---------------|-----------------------|-------------------|-----------|----------|-----------------------------|--------------------------|------------------------|----------------|--|--|
| Variants:<br>VaphiSt2_B_FDSW210055056<br>-Ir | GGC              | 4062 | 4064 | 3  | TCA -> GGC                      | 19 -><br>21   | Substitution          | 100.00%           | 1.00E-38  |          |                             |                          |                        |                |  |  |
| Variants:<br>VaphiSt2_B_FDSW210055056<br>-Ir | CGGTATTG<br>CGTT | 4067 | 4078 | 12 | ACCGTCGCGCCG -><br>CGGTATTGCGTT | 5 -><br>19    | Substitution          | 100.00%           | 1.00E-07  |          |                             |                          |                        |                |  |  |
| Variants:<br>VaphiSt2_B_FDSW210055056<br>-Ir | G                | 4346 | 4346 | 1  | A -> G                          | 14            | SNP<br>(transition)   | 100.00%           | 2.50E-20  | F -> L   | hypothetical<br>protein CDS | hypothetica<br>l protein | Substituti<br>on       | KLI69<br>882.1 |  |  |
| Variants:<br>VaphiSt2_B_FDSW210055056<br>-Ir | T                | 4349 | 4349 | 1  | C -> T                          | 23            | SNP<br>(transition)   | 95.70%            | 1.40E-34  | E -> K   | hypothetical<br>protein CDS | hypothetica<br>l protein | Substituti<br>on       | KLI69<br>882.1 |  |  |
| Variants:<br>VaphiSt2_B_FDSW210055056<br>-Ir | G                | 4363 | 4363 | 1  | A -> G                          | 120           | SNP<br>(transition)   | 32.50%            | 1.70E-105 | V -> A   | hypothetical<br>protein CDS | hypothetica<br>l protein | Substituti<br>on       | KLI69<br>882.1 |  |  |
| Variants:<br>VaphiSt2_B_FDSW210055056<br>-Ir | T                | 4379 | 4379 | 1  | C -> T                          | 366           | SNP<br>(transition)   | 99.50%            | 0         | A -> T   | hypothetical<br>protein CDS | hypothetica<br>l protein | Substituti<br>on       | KLI69<br>882.1 |  |  |
| Variants:<br>VaphiSt2_B_FDSW210055056<br>-Ir | CATGA            | 4381 | 4385 | 5  | TGGTG -> CATGA                  | 396 -><br>435 | Substitution          | 99.7% -><br>99.8% | 0         |          | hypothetical<br>protein CDS | hypothetica<br>l protein | Truncatio<br>n         | KLI69<br>882.1 |  |  |
| Variants:<br>VaphiSt2_B_FDSW210055056<br>-Ir | GG               | 4388 | 4389 | 2  | CA -> GG                        | 454 -><br>470 | Substitution          | 99.80%            | 0         | PE -> PQ | hypothetical<br>protein CDS | hypothetica<br>l protein | Substituti<br>on       | KLI69<br>882.1 |  |  |
| Variants:<br>VaphiSt2_B_FDSW210055056<br>-Ir | TGA              | 4392 | 4394 | 2  | CGT -> TGA                      | 508 -><br>537 | Substitution          | 99.0% -><br>99.1% | 0         | T -> S   | hypothetical<br>protein CDS | hypothetica<br>l protein | Substituti<br>on       | KLI69<br>882.1 |  |  |
| Variants:<br>VaphiSt2_B_FDSW210055056<br>-Ir | GT               | 4396 | 4397 | 2  | AA -> GT                        | 559 -><br>568 | Substitution          | 99.10%            | 0         | F -> T   | hypothetical<br>protein CDS | hypothetica<br>l protein | Substituti<br>on       | KLI69<br>882.1 |  |  |
| Variants:<br>VaphiSt2_B_FDSW210055056<br>-Ir | A                | 4401 | 4401 | 1  | C -> A                          | 613           | SNP<br>(transversion) | 100.00%           | 0         | M -> V   | hypothetical<br>protein CDS | hypothetica<br>l protein | Start<br>Codon<br>Loss | KLI69<br>882.1 |  |  |
| Variants:<br>VaphiSt2_B_FDSW210055056<br>-Ir | A                | 4404 | 4406 | 3  | GTT -> A                        | 640           | Deletion              | 99.50%            | 0         |          |                             |                          |                        |                |  |  |
| Variants:<br>VaphiSt2_B_FDSW210055056<br>-Ir | GT               | 4409 | 4410 | 2  | TC -> GT                        | 667 -><br>676 | Substitution          | 99.30%            | 0         |          |                             |                          |                        |                |  |  |
| Variants:<br>VaphiSt2_B_FDSW210055056<br>-Ir | GC               | 4414 | 4415 | 2  | CT -> GC                        | 715 -><br>727 | Substitution          | 100.00%           | 0         |          |                             |                          |                        |                |  |  |
| Variants:<br>VaphiSt2_B_FDSW210055056<br>-Ir | A                | 4417 | 4417 | 1  | G -> A                          | 752           | SNP<br>(transition)   | 99.90%            | 0         |          |                             |                          |                        |                |  |  |
| Variants:<br>VaphiSt2_B_FDSW210055056<br>-Ir | GG               | 4419 | 4420 | 2  | CA -> GG                        | 766 -><br>779 | Substitution          | 99.6% -><br>99.7% | 0         |          |                             |                          |                        |                |  |  |
| Variants:<br>VaphiSt2_B_FDSW210055056<br>-Ir | AC               | 4423 | 4424 | 2  | GA -> AC                        | 804 -><br>811 | Substitution          | 98.40%            | 0         |          |                             |                          |                        |                |  |  |
| Variants:<br>VaphiSt2_B_FDSW210055056<br>-Ir | G                | 4427 | 4426 | 0  | #NAME?                          | 846           | Insertion             | 99.90%            | 0         |          |                             |                          |                        |                |  |  |
| Variants:<br>VaphiSt2_B_FDSW210055056<br>-Ir | TG               | 4431 | 4432 | 2  | GA -> TG                        | 908 -><br>910 | Substitution          | 99.80%            | 0         |          |                             |                          |                        |                |  |  |
| Variants:<br>VaphiSt2_B_FDSW210055056<br>-Ir | A                | 4434 | 4433 | 0  | #NAME?                          | 927           | Insertion             | 99.70%            | 0         |          |                             |                          |                        |                |  |  |
| Variants:<br>VaphiSt2_B_FDSW210055056<br>-Ir | CA               | 4435 | 4436 | 2  | GT -> CA                        | 951 -><br>961 | Substitution          | 99.40%            | 0         |          |                             |                          |                        |                |  |  |
| Variants:<br>VaphiSt2_B_FDSW210055056<br>-Ir | A                | 4668 | 4668 | 1  | G -> A                          | 991           | SNP<br>(transition)   | 26.50%            | 0         |          |                             |                          |                        |                |  |  |

|   |   |   |   |   |   |   |   |   |    |    |    |    |    |    |    |    |    |    |    |    |    |    |    |    |    |    |    |    |    |    |    |    |    |    |    |    |    |    |    |    |    |    |    |    |    |    |    |    |    |    |    |    |    |    |    |    |    |    |    |    |    |    |    |    |    |    |    |    |    |    |    |    |    |    |    |    |    |    |    |    |    |    |    |    |    |    |    |    |    |    |    |    |    |    |    |    |    |    |     |     |     |     |     |     |     |     |     |     |     |     |     |     |     |     |     |     |     |     |     |     |     |     |     |     |     |     |     |     |     |     |     |     |     |     |     |     |     |     |     |     |     |     |     |     |     |     |     |     |     |     |     |     |     |     |     |     |     |     |     |     |     |     |     |     |     |     |     |     |     |     |     |     |     |     |     |     |     |     |     |     |     |     |     |     |     |     |     |     |     |     |     |     |     |     |     |     |     |     |     |     |     |     |     |     |     |     |     |     |     |     |     |     |     |     |     |     |     |     |     |     |     |     |     |     |     |     |     |     |     |     |     |     |     |     |     |     |     |     |     |     |     |     |     |     |     |     |     |     |     |     |     |     |     |     |     |     |     |     |     |     |     |     |     |     |     |     |     |     |     |     |     |     |     |     |     |     |     |     |     |     |     |     |     |     |     |     |     |     |     |     |     |     |     |     |     |     |     |     |     |     |     |     |     |     |     |     |     |     |     |     |     |     |     |     |     |     |     |     |     |     |     |     |     |     |     |     |     |     |     |     |     |     |     |     |     |     |     |     |     |     |     |     |     |     |     |     |     |     |     |     |     |     |     |     |     |     |     |     |     |     |     |     |     |     |     |     |     |     |     |     |     |     |     |     |     |     |     |     |     |     |     |     |     |     |     |     |     |     |     |     |     |     |     |     |     |     |     |     |     |     |     |     |     |     |     |     |     |     |     |     |     |     |     |     |     |     |     |     |     |     |     |     |     |     |     |     |     |     |     |     |     |     |     |     |     |     |     |     |     |     |     |     |     |     |     |     |     |     |     |     |     |     |     |     |     |     |     |     |     |     |     |     |     |     |     |     |     |     |     |     |     |     |     |     |     |     |     |     |     |     |     |     |     |     |     |     |     |     |     |     |     |     |     |     |     |     |     |     |     |     |     |     |     |     |     |     |     |     |     |     |     |     |     |     |     |     |     |     |     |     |     |     |     |     |     |     |     |     |     |     |     |     |     |     |     |     |     |     |     |     |     |     |     |     |     |     |     |     |     |     |     |     |     |     |     |     |     |     |     |     |     |     |     |     |     |     |     |     |     |     |     |     |     |     |     |     |     |     |     |     |     |     |     |     |     |     |     |     |     |     |     |     |     |     |     |     |     |     |     |     |     |     |     |     |     |     |     |     |     |     |     |     |     |     |     |     |     |     |     |     |     |     |     |     |     |     |     |     |     |     |     |     |     |     |     |     |     |     |     |     |     |     |     |     |     |     |     |     |     |     |     |     |     |     |     |     |     |     |     |     |     |     |     |     |     |     |     |     |     |     |     |     |     |     |     |     |     |     |     |     |     |     |     |     |     |     |     |     |     |     |     |     |     |     |     |     |     |     |     |     |     |     |     |     |     |     |     |     |     |     |     |     |     |     |     |     |     |     |     |     |     |     |     |     |     |     |     |     |     |     |     |     |     |     |     |     |     |     |     |     |     |     |     |     |     |     |     |     |     |     |     |     |     |     |     |     |     |     |     |     |     |     |     |     |     |     |     |     |     |     |     |     |     |     |     |     |     |     |     |     |     |     |     |     |     |     |     |     |     |     |     |     |     |     |     |     |     |     |     |     |     |     |     |     |     |     |     |     |     |     |     |     |     |     |     |     |     |     |     |     |     |     |     |     |     |     |     |     |     |     |     |     |     |     |     |     |     |     |     |     |     |     |     |     |     |     |     |     |     |     |     |     |     |     |     |     |     |     |     |     |     |     |     |     |     |     |     |     |     |     |     |     |     |     |     |     |     |     |     |     |     |     |     |     |     |     |     |     |     |     |     |     |     |     |     |     |     |     |     |     |     |     |     |     |     |     |     |     |     |     |     |     |     |     |     |     |     |     |     |     |     |     |     |     |     |     |     |     |     |     |     |     |     |     |     |     |     |     |     |     |     |     |     |     |     |     |     |     |     |     |     |     |     |     |     |     |     |     |     |     |     |     |     |     |     |     |     |     |     |     |     |     |     |     |     |     |     |     |     |     |     |     |     |     |     |     |     |     |     |     |     |     |     |     |     |     |     |     |      |
|---|---|---|---|---|---|---|---|---|----|----|----|----|----|----|----|----|----|----|----|----|----|----|----|----|----|----|----|----|----|----|----|----|----|----|----|----|----|----|----|----|----|----|----|----|----|----|----|----|----|----|----|----|----|----|----|----|----|----|----|----|----|----|----|----|----|----|----|----|----|----|----|----|----|----|----|----|----|----|----|----|----|----|----|----|----|----|----|----|----|----|----|----|----|----|----|----|----|----|-----|-----|-----|-----|-----|-----|-----|-----|-----|-----|-----|-----|-----|-----|-----|-----|-----|-----|-----|-----|-----|-----|-----|-----|-----|-----|-----|-----|-----|-----|-----|-----|-----|-----|-----|-----|-----|-----|-----|-----|-----|-----|-----|-----|-----|-----|-----|-----|-----|-----|-----|-----|-----|-----|-----|-----|-----|-----|-----|-----|-----|-----|-----|-----|-----|-----|-----|-----|-----|-----|-----|-----|-----|-----|-----|-----|-----|-----|-----|-----|-----|-----|-----|-----|-----|-----|-----|-----|-----|-----|-----|-----|-----|-----|-----|-----|-----|-----|-----|-----|-----|-----|-----|-----|-----|-----|-----|-----|-----|-----|-----|-----|-----|-----|-----|-----|-----|-----|-----|-----|-----|-----|-----|-----|-----|-----|-----|-----|-----|-----|-----|-----|-----|-----|-----|-----|-----|-----|-----|-----|-----|-----|-----|-----|-----|-----|-----|-----|-----|-----|-----|-----|-----|-----|-----|-----|-----|-----|-----|-----|-----|-----|-----|-----|-----|-----|-----|-----|-----|-----|-----|-----|-----|-----|-----|-----|-----|-----|-----|-----|-----|-----|-----|-----|-----|-----|-----|-----|-----|-----|-----|-----|-----|-----|-----|-----|-----|-----|-----|-----|-----|-----|-----|-----|-----|-----|-----|-----|-----|-----|-----|-----|-----|-----|-----|-----|-----|-----|-----|-----|-----|-----|-----|-----|-----|-----|-----|-----|-----|-----|-----|-----|-----|-----|-----|-----|-----|-----|-----|-----|-----|-----|-----|-----|-----|-----|-----|-----|-----|-----|-----|-----|-----|-----|-----|-----|-----|-----|-----|-----|-----|-----|-----|-----|-----|-----|-----|-----|-----|-----|-----|-----|-----|-----|-----|-----|-----|-----|-----|-----|-----|-----|-----|-----|-----|-----|-----|-----|-----|-----|-----|-----|-----|-----|-----|-----|-----|-----|-----|-----|-----|-----|-----|-----|-----|-----|-----|-----|-----|-----|-----|-----|-----|-----|-----|-----|-----|-----|-----|-----|-----|-----|-----|-----|-----|-----|-----|-----|-----|-----|-----|-----|-----|-----|-----|-----|-----|-----|-----|-----|-----|-----|-----|-----|-----|-----|-----|-----|-----|-----|-----|-----|-----|-----|-----|-----|-----|-----|-----|-----|-----|-----|-----|-----|-----|-----|-----|-----|-----|-----|-----|-----|-----|-----|-----|-----|-----|-----|-----|-----|-----|-----|-----|-----|-----|-----|-----|-----|-----|-----|-----|-----|-----|-----|-----|-----|-----|-----|-----|-----|-----|-----|-----|-----|-----|-----|-----|-----|-----|-----|-----|-----|-----|-----|-----|-----|-----|-----|-----|-----|-----|-----|-----|-----|-----|-----|-----|-----|-----|-----|-----|-----|-----|-----|-----|-----|-----|-----|-----|-----|-----|-----|-----|-----|-----|-----|-----|-----|-----|-----|-----|-----|-----|-----|-----|-----|-----|-----|-----|-----|-----|-----|-----|-----|-----|-----|-----|-----|-----|-----|-----|-----|-----|-----|-----|-----|-----|-----|-----|-----|-----|-----|-----|-----|-----|-----|-----|-----|-----|-----|-----|-----|-----|-----|-----|-----|-----|-----|-----|-----|-----|-----|-----|-----|-----|-----|-----|-----|-----|-----|-----|-----|-----|-----|-----|-----|-----|-----|-----|-----|-----|-----|-----|-----|-----|-----|-----|-----|-----|-----|-----|-----|-----|-----|-----|-----|-----|-----|-----|-----|-----|-----|-----|-----|-----|-----|-----|-----|-----|-----|-----|-----|-----|-----|-----|-----|-----|-----|-----|-----|-----|-----|-----|-----|-----|-----|-----|-----|-----|-----|-----|-----|-----|-----|-----|-----|-----|-----|-----|-----|-----|-----|-----|-----|-----|-----|-----|-----|-----|-----|-----|-----|-----|-----|-----|-----|-----|-----|-----|-----|-----|-----|-----|-----|-----|-----|-----|-----|-----|-----|-----|-----|-----|-----|-----|-----|-----|-----|-----|-----|-----|-----|-----|-----|-----|-----|-----|-----|-----|-----|-----|-----|-----|-----|-----|-----|-----|-----|-----|-----|-----|-----|-----|-----|-----|-----|-----|-----|-----|-----|-----|-----|-----|-----|-----|-----|-----|-----|-----|-----|-----|-----|-----|-----|-----|-----|-----|-----|-----|-----|-----|-----|-----|-----|-----|-----|-----|-----|-----|-----|-----|-----|-----|-----|-----|-----|-----|-----|-----|-----|-----|-----|-----|-----|-----|-----|-----|-----|-----|-----|-----|-----|-----|-----|-----|-----|-----|-----|-----|-----|-----|-----|-----|-----|-----|-----|-----|-----|-----|-----|-----|-----|-----|-----|-----|-----|-----|-----|-----|-----|-----|-----|-----|-----|-----|-----|-----|-----|-----|-----|-----|-----|-----|-----|-----|-----|-----|-----|-----|-----|-----|-----|-----|-----|-----|-----|-----|-----|-----|-----|-----|-----|-----|-----|-----|-----|-----|-----|-----|-----|-----|-----|-----|-----|-----|-----|-----|-----|-----|-----|-----|-----|-----|-----|-----|-----|-----|-----|-----|-----|-----|-----|-----|-----|-----|-----|-----|-----|-----|-----|-----|-----|-----|-----|-----|-----|-----|-----|-----|-----|-----|-----|-----|-----|-----|-----|-----|-----|-----|-----|-----|-----|-----|-----|-----|-----|-----|-----|-----|-----|-----|-----|-----|-----|-----|-----|-----|-----|-----|-----|-----|-----|-----|-----|-----|-----|-----|-----|-----|-----|-----|-----|-----|-----|-----|-----|-----|-----|-----|-----|-----|-----|-----|-----|-----|-----|-----|-----|-----|-----|-----|-----|-----|-----|-----|-----|-----|-----|-----|-----|-----|-----|-----|-----|-----|-----|-----|-----|-----|-----|-----|-----|-----|-----|-----|-----|-----|-----|-----|-----|------|
| 1 | 2 | 3 | 4 | 5 | 6 | 7 | 8 | 9 | 10 | 11 | 12 | 13 | 14 | 15 | 16 | 17 | 18 | 19 | 20 | 21 | 22 | 23 | 24 | 25 | 26 | 27 | 28 | 29 | 30 | 31 | 32 | 33 | 34 | 35 | 36 | 37 | 38 | 39 | 40 | 41 | 42 | 43 | 44 | 45 | 46 | 47 | 48 | 49 | 50 | 51 | 52 | 53 | 54 | 55 | 56 | 57 | 58 | 59 | 60 | 61 | 62 | 63 | 64 | 65 | 66 | 67 | 68 | 69 | 70 | 71 | 72 | 73 | 74 | 75 | 76 | 77 | 78 | 79 | 80 | 81 | 82 | 83 | 84 | 85 | 86 | 87 | 88 | 89 | 90 | 91 | 92 | 93 | 94 | 95 | 96 | 97 | 98 | 99 | 100 | 101 | 102 | 103 | 104 | 105 | 106 | 107 | 108 | 109 | 110 | 111 | 112 | 113 | 114 | 115 | 116 | 117 | 118 | 119 | 120 | 121 | 122 | 123 | 124 | 125 | 126 | 127 | 128 | 129 | 130 | 131 | 132 | 133 | 134 | 135 | 136 | 137 | 138 | 139 | 140 | 141 | 142 | 143 | 144 | 145 | 146 | 147 | 148 | 149 | 150 | 151 | 152 | 153 | 154 | 155 | 156 | 157 | 158 | 159 | 160 | 161 | 162 | 163 | 164 | 165 | 166 | 167 | 168 | 169 | 170 | 171 | 172 | 173 | 174 | 175 | 176 | 177 | 178 | 179 | 180 | 181 | 182 | 183 | 184 | 185 | 186 | 187 | 188 | 189 | 190 | 191 | 192 | 193 | 194 | 195 | 196 | 197 | 198 | 199 | 200 | 201 | 202 | 203 | 204 | 205 | 206 | 207 | 208 | 209 | 210 | 211 | 212 | 213 | 214 | 215 | 216 | 217 | 218 | 219 | 220 | 221 | 222 | 223 | 224 | 225 | 226 | 227 | 228 | 229 | 230 | 231 | 232 | 233 | 234 | 235 | 236 | 237 | 238 | 239 | 240 | 241 | 242 | 243 | 244 | 245 | 246 | 247 | 248 | 249 | 250 | 251 | 252 | 253 | 254 | 255 | 256 | 257 | 258 | 259 | 260 | 261 | 262 | 263 | 264 | 265 | 266 | 267 | 268 | 269 | 270 | 271 | 272 | 273 | 274 | 275 | 276 | 277 | 278 | 279 | 280 | 281 | 282 | 283 | 284 | 285 | 286 | 287 | 288 | 289 | 290 | 291 | 292 | 293 | 294 | 295 | 296 | 297 | 298 | 299 | 300 | 301 | 302 | 303 | 304 | 305 | 306 | 307 | 308 | 309 | 310 | 311 | 312 | 313 | 314 | 315 | 316 | 317 | 318 | 319 | 320 | 321 | 322 | 323 | 324 | 325 | 326 | 327 | 328 | 329 | 330 | 331 | 332 | 333 | 334 | 335 | 336 | 337 | 338 | 339 | 340 | 341 | 342 | 343 | 344 | 345 | 346 | 347 | 348 | 349 | 350 | 351 | 352 | 353 | 354 | 355 | 356 | 357 | 358 | 359 | 360 | 361 | 362 | 363 | 364 | 365 | 366 | 367 | 368 | 369 | 370 | 371 | 372 | 373 | 374 | 375 | 376 | 377 | 378 | 379 | 380 | 381 | 382 | 383 | 384 | 385 | 386 | 387 | 388 | 389 | 390 | 391 | 392 | 393 | 394 | 395 | 396 | 397 | 398 | 399 | 400 | 401 | 402 | 403 | 404 | 405 | 406 | 407 | 408 | 409 | 410 | 411 | 412 | 413 | 414 | 415 | 416 | 417 | 418 | 419 | 420 | 421 | 422 | 423 | 424 | 425 | 426 | 427 | 428 | 429 | 430 | 431 | 432 | 433 | 434 | 435 | 436 | 437 | 438 | 439 | 440 | 441 | 442 | 443 | 444 | 445 | 446 | 447 | 448 | 449 | 450 | 451 | 452 | 453 | 454 | 455 | 456 | 457 | 458 | 459 | 460 | 461 | 462 | 463 | 464 | 465 | 466 | 467 | 468 | 469 | 470 | 471 | 472 | 473 | 474 | 475 | 476 | 477 | 478 | 479 | 480 | 481 | 482 | 483 | 484 | 485 | 486 | 487 | 488 | 489 | 490 | 491 | 492 | 493 | 494 | 495 | 496 | 497 | 498 | 499 | 500 | 501 | 502 | 503 | 504 | 505 | 506 | 507 | 508 | 509 | 510 | 511 | 512 | 513 | 514 | 515 | 516 | 517 | 518 | 519 | 520 | 521 | 522 | 523 | 524 | 525 | 526 | 527 | 528 | 529 | 530 | 531 | 532 | 533 | 534 | 535 | 536 | 537 | 538 | 539 | 540 | 541 | 542 | 543 | 544 | 545 | 546 | 547 | 548 | 549 | 550 | 551 | 552 | 553 | 554 | 555 | 556 | 557 | 558 | 559 | 560 | 561 | 562 | 563 | 564 | 565 | 566 | 567 | 568 | 569 | 570 | 571 | 572 | 573 | 574 | 575 | 576 | 577 | 578 | 579 | 580 | 581 | 582 | 583 | 584 | 585 | 586 | 587 | 588 | 589 | 590 | 591 | 592 | 593 | 594 | 595 | 596 | 597 | 598 | 599 | 600 | 601 | 602 | 603 | 604 | 605 | 606 | 607 | 608 | 609 | 610 | 611 | 612 | 613 | 614 | 615 | 616 | 617 | 618 | 619 | 620 | 621 | 622 | 623 | 624 | 625 | 626 | 627 | 628 | 629 | 630 | 631 | 632 | 633 | 634 | 635 | 636 | 637 | 638 | 639 | 640 | 641 | 642 | 643 | 644 | 645 | 646 | 647 | 648 | 649 | 650 | 651 | 652 | 653 | 654 | 655 | 656 | 657 | 658 | 659 | 660 | 661 | 662 | 663 | 664 | 665 | 666 | 667 | 668 | 669 | 670 | 671 | 672 | 673 | 674 | 675 | 676 | 677 | 678 | 679 | 680 | 681 | 682 | 683 | 684 | 685 | 686 | 687 | 688 | 689 | 690 | 691 | 692 | 693 | 694 | 695 | 696 | 697 | 698 | 699 | 700 | 701 | 702 | 703 | 704 | 705 | 706 | 707 | 708 | 709 | 710 | 711 | 712 | 713 | 714 | 715 | 716 | 717 | 718 | 719 | 720 | 721 | 722 | 723 | 724 | 725 | 726 | 727 | 728 | 729 | 730 | 731 | 732 | 733 | 734 | 735 | 736 | 737 | 738 | 739 | 740 | 741 | 742 | 743 | 744 | 745 | 746 | 747 | 748 | 749 | 750 | 751 | 752 | 753 | 754 | 755 | 756 | 757 | 758 | 759 | 760 | 761 | 762 | 763 | 764 | 765 | 766 | 767 | 768 | 769 | 770 | 771 | 772 | 773 | 774 | 775 | 776 | 777 | 778 | 779 | 780 | 781 | 782 | 783 | 784 | 785 | 786 | 787 | 788 | 789 | 790 | 791 | 792 | 793 | 794 | 795 | 796 | 797 | 798 | 799 | 800 | 801 | 802 | 803 | 804 | 805 | 806 | 807 | 808 | 809 | 810 | 811 | 812 | 813 | 814 | 815 | 816 | 817 | 818 | 819 | 820 | 821 | 822 | 823 | 824 | 825 | 826 | 827 | 828 | 829 | 830 | 831 | 832 | 833 | 834 | 835 | 836 | 837 | 838 | 839 | 840 | 841 | 842 | 843 | 844 | 845 | 846 | 847 | 848 | 849 | 850 | 851 | 852 | 853 | 854 | 855 | 856 | 857 | 858 | 859 | 860 | 861 | 862 | 863 | 864 | 865 | 866 | 867 | 868 | 869 | 870 | 871 | 872 | 873 | 874 | 875 | 876 | 877 | 878 | 879 | 880 | 881 | 882 | 883 | 884 | 885 | 886 | 887 | 888 | 889 | 890 | 891 | 892 | 893 | 894 | 895 | 896 | 897 | 898 | 899 | 900 | 901 | 902 | 903 | 904 | 905 | 906 | 907 | 908 | 909 | 910 | 911 | 912 | 913 | 914 | 915 | 916 | 917 | 918 | 919 | 920 | 921 | 922 | 923 | 924 | 925 | 926 | 927 | 928 | 929 | 930 | 931 | 932 | 933 | 934 | 935 | 936 | 937 | 938 | 939 | 940 | 941 | 942 | 943 | 944 | 945 | 946 | 947 | 948 | 949 | 950 | 951 | 952 | 953 | 954 | 955 | 956 | 957 | 958 | 959 | 960 | 961 | 962 | 963 | 964 | 965 | 966 | 967 | 968 | 969 | 970 | 971 | 972 | 973 | 974 | 975 | 976 | 977 | 978 | 979 | 980 | 981 | 982 | 983 | 984 | 985 | 986 | 987 | 988 | 989 | 990 | 991 | 992 | 993 | 994 | 995 | 996 | 997 | 998 | 999 | 1000 |
| 1 | 2 | 3 | 4 | 5 | 6 | 7 | 8 | 9 | 10 | 11 | 12 | 13 | 14 | 15 | 16 | 17 | 18 | 19 | 20 | 21 | 22 | 23 | 24 | 25 | 26 | 27 | 28 | 29 | 30 | 31 | 32 | 33 | 34 | 35 | 36 | 37 | 38 | 39 | 40 | 41 | 42 | 43 | 44 | 45 | 46 | 47 | 48 | 49 | 50 | 51 | 52 | 53 | 54 | 55 | 56 | 57 | 58 | 59 | 60 | 61 | 62 | 63 | 64 | 65 | 66 | 67 | 68 | 69 | 70 | 71 | 72 | 73 | 74 | 75 | 76 | 77 | 78 | 79 | 80 | 81 | 82 | 83 | 84 | 85 | 86 | 87 | 88 | 89 | 90 | 91 | 92 | 93 | 94 | 95 | 96 | 97 | 98 | 99 | 100 | 101 | 102 | 103 | 104 | 105 | 106 | 107 | 108 | 109 | 110 | 111 | 112 | 113 | 114 | 115 | 116 | 117 | 118 | 119 | 120 | 121 | 122 | 123 | 124 | 125 | 126 | 127 | 128 | 129 | 130 | 131 | 132 | 133 | 134 | 135 | 136 | 137 | 138 | 139 | 140 | 141 | 142 | 143 | 144 | 145 | 146 | 147 | 148 | 149 | 150 | 151 | 152 | 153 | 154 | 155 | 156 | 157 | 158 | 159 | 160 | 161 | 162 | 163 | 164 | 165 | 166 | 167 | 168 | 169 | 170 | 171 | 172 | 173 | 174 | 175 | 176 | 177 | 178 | 179 | 180 | 181 | 182 | 183 | 184 | 185 | 186 | 187 | 188 | 189 | 190 | 191 | 192 | 193 | 194 | 195 | 196 | 197 | 198 | 199 | 200 | 201 | 202 | 203 | 204 | 205 | 206 | 207 | 208 | 209 | 210 | 211 | 212 | 213 | 214 | 215 | 216 | 217 | 218 | 219 | 220 | 221 | 222 | 223 | 224 | 225 | 226 | 227 | 228 | 229 | 230 | 231 | 232 | 233 | 234 | 235 | 236 | 237 | 238 | 239 | 240 | 241 | 242 | 243 | 244 | 245 | 246 | 247 | 248 | 249 | 250 | 251 | 252 | 253 | 254 | 255 | 256 | 257 | 258 | 259 | 260 | 261 | 262 | 263 | 264 | 265 | 266 | 267 | 268 | 269 | 270 | 271 | 272 | 273 | 274 | 275 | 276 | 277 | 278 | 279 | 280 | 281 | 282 | 283 | 284 | 285 | 286 | 287 | 288 | 289 | 290 | 291 | 292 | 293 | 294 | 295 | 296 | 297 | 298 | 299 | 300 | 301 | 302 | 303 | 304 | 305 | 306 | 307 | 308 | 309 | 310 | 311 | 312 | 313 | 314 | 315 | 316 | 317 | 318 | 319 | 320 | 321 | 322 | 323 | 324 | 325 | 326 | 327 | 328 | 329 | 330 | 331 | 332 | 333 | 334 | 335 | 336 | 337 | 338 | 339 | 340 | 341 | 342 | 343 | 344 | 345 | 346 | 347 | 348 | 349 | 350 | 351 | 352 | 353 | 354 | 355 | 356 | 357 | 358 | 359 | 360 | 361 | 362 | 363 | 364 | 365 | 366 | 367 | 368 | 369 | 370 | 371 | 372 | 373 | 374 | 375 | 376 | 377 | 378 | 379 | 380 | 381 | 382 | 383 | 384 | 385 | 386 | 387 | 388 | 389 | 390 | 391 | 392 | 393 | 394 | 395 | 396 | 397 | 398 | 399 | 400 | 401 | 402 | 403 | 404 | 405 | 406 | 407 | 408 | 409 | 410 | 411 | 412 | 413 | 414 | 415 | 416 | 417 | 418 | 419 | 420 | 421 | 422 | 423 | 424 | 425 | 426 | 427 | 428 | 429 | 430 | 431 | 432 | 433 | 434 | 435 | 436 | 437 | 438 | 439 | 440 | 441 | 442 | 443 | 444 | 445 | 446 | 447 | 448 | 449 | 450 | 451 | 452 | 453 | 454 | 455 | 456 | 457 | 458 | 459 | 460 | 461 | 462 | 463 | 464 | 465 | 466 | 467 | 468 | 469 | 470 | 471 | 472 | 473 | 474 | 475 | 476 | 477 | 478 | 479 | 480 | 481 | 482 | 483 | 484 | 485 | 486 | 487 | 488 | 489 | 490 | 491 | 492 | 493 | 494 | 495 | 496 | 497 | 498 | 499 | 500 | 501 | 502 | 503 | 504 | 505 | 506 | 507 | 508 | 509 | 510 | 511 | 512 | 513 | 514 | 515 | 516 | 517 | 518 | 519 | 520 | 521 | 522 | 523 | 524 | 525 | 526 | 527 | 528 | 529 | 530 | 531 | 532 | 533 | 534 | 535 | 536 | 537 | 538 | 539 | 540 | 541 | 542 | 543 | 544 | 545 | 546 | 547 | 548 | 549 | 550 | 551 | 552 | 553 | 554 | 555 | 556 | 557 | 558 | 559 | 560 | 561 | 562 | 563 | 564 | 565 | 566 | 567 | 568 | 569 | 570 | 571 | 572 | 573 | 574 |     |     |     |     |     |     |     |     |     |     |     |     |     |     |     |     |     |     |     |     |     |     |     |     |     |     |     |     |     |     |     |     |     |     |     |     |     |     |     |     |     |     |     |     |     |     |     |     |     |     |     |     |     |     |     |     |     |     |     |     |     |     |     |     |     |     |     |     |     |     |     |     |     |     |     |     |     |     |     |     |     |     |     |     |     |     |     |     |     |     |     |     |     |     |     |     |     |     |     |     |     |     |     |     |     |     |     |     |     |     |     |     |     |     |     |     |     |     |     |     |     |     |     |     |     |     |     |     |     |     |     |     |     |     |     |     |     |     |     |     |     |     |     |     |     |     |     |     |     |     |     |     |     |     |     |     |     |     |     |     |     |     |     |     |     |     |     |     |     |     |     |     |     |     |     |     |     |     |     |     |     |     |     |     |     |     |     |     |     |     |     |     |     |     |     |     |     |     |     |     |     |     |     |     |     |     |     |     |     |     |     |     |     |     |     |     |     |     |     |     |     |     |     |     |     |     |     |     |     |     |     |     |     |     |     |     |     |     |     |     |     |     |     |     |     |     |     |     |     |     |     |     |     |     |     |     |     |     |     |     |     |     |     |     |     |     |     |     |     |     |     |     |     |     |     |     |     |     |     |     |     |     |     |     |     |     |     |     |     |     |     |     |     |     |     |     |     |     |     |     |     |     |     |     |     |     |     |     |     |     |     |     |     |     |     |     |     |     |     |     |     |     |     |     |     |     |     |     |     |     |     |     |     |     |     |     |     |     |     |     |     |     |     |     |     |     |     |     |     |     |     |     |     |     |     |     |     |     |     |     |     |     |     |     |     |     |     |     |     |     |     |     |     |     |     |     |     |     |     |     |     |     |     |     |     |     |     |     |     |     |     |     |     |     |     |     |     |     |     |     |     |     |     |     |     |     |     |     |     |     |     |     |     |     |     |     |     |     |     |     |     |     |     |     |     |      |

|                                              |      |      |      |   |              |             |                       |                   |           |
|----------------------------------------------|------|------|------|---|--------------|-------------|-----------------------|-------------------|-----------|
| Variants:<br>VaphiSt2_B_FDSW210055056<br>-1r | GTG  | 5005 | 5007 | 3 | TAC -> GTG   | 83 -><br>94 | Substitution          | 32.5% -><br>36.2% | 2.90E-76  |
| Variants:<br>VaphiSt2_B_FDSW210055056<br>-1r | T    | 5011 | 5011 | 1 | G -> T       | 64          | SNP<br>(transversion) | 28.10%            | 1.40E-44  |
| Variants:<br>VaphiSt2_B_FDSW210055056<br>-1r | C    | 5579 | 5579 | 1 | G -> C       | 93          | SNP<br>(transversion) | 100.00%           | 6.3E-317  |
| Variants:<br>VaphiSt2_B_FDSW210055056<br>-1r | T    | 5581 | 5581 | 1 | A -> T       | 87          | SNP<br>(transversion) | 100.00%           | 7.90E-288 |
| Variants:<br>VaphiSt2_B_FDSW210055056<br>-1r | CG   | 5583 | 5584 | 2 | TA -> CG     | 83 -><br>85 | Substitution          | 98.80%            | 1.30E-277 |
| Variants:<br>VaphiSt2_B_FDSW210055056<br>-1r | C    | 5607 | 5607 | 1 | A -> C       | 52          | SNP<br>(transversion) | 28.80%            | 1.40E-40  |
| Variants:<br>VaphiSt2_B_FDSW210055056<br>-1r | TT   | 5609 | 5610 | 2 | AA -> TT     | 54          | Substitution          | 31.5% -><br>35.2% | 3.70E-43  |
| Variants:<br>VaphiSt2_B_FDSW210055056<br>-1r | AA   | 5612 | 5613 | 2 | GC -> AA     | 55 -><br>59 | Substitution          | 41.8% -><br>45.8% | 1.20E-63  |
| Variants:<br>VaphiSt2_B_FDSW210055056<br>-1r | GGG  | 5615 | 5617 | 3 | TTA -> GGG   | 58 -><br>61 | Substitution          | 50.0% -><br>54.1% | 7.50E-83  |
| Variants:<br>VaphiSt2_B_FDSW210055056<br>-1r | A    | 5618 | 5618 | 1 | G -> A       | 65          | SNP<br>(transition)   | 56.90%            | 3.10E-108 |
| Variants:<br>VaphiSt2_B_FDSW210055056<br>-1r | T    | 5618 | 5618 | 1 | G -> T       | 65          | SNP<br>(transversion) | 43.10%            | 7.40E-61  |
| Variants:<br>VaphiSt2_B_FDSW210055056<br>-1r | GT   | 5619 | 5620 | 2 | TC -> GT     | 65 -><br>67 | Substitution          | 100.00%           | 1.00E-208 |
| Variants:<br>VaphiSt2_B_FDSW210055056<br>-1r | C    | 5621 | 5621 | 1 | G -> C       | 65          | SNP<br>(transversion) | 63.10%            | 1.60E-122 |
| Variants:<br>VaphiSt2_B_FDSW210055056<br>-1r | T    | 5622 | 5622 | 1 | C -> T       | 65          | SNP<br>(transition)   | 100.00%           | 1.00E-208 |
| Variants:<br>VaphiSt2_B_FDSW210055056<br>-1r | G    | 5623 | 5623 | 1 | C -> G       | 63          | SNP<br>(transversion) | 65.10%            | 2.10E-123 |
| Variants:<br>VaphiSt2_B_FDSW210055056<br>-1r | AA   | 5624 | 5625 | 2 | TT -> AA     | 65          | Substitution          | 96.90%            | 4.10E-180 |
| Variants:<br>VaphiSt2_B_FDSW210055056<br>-1r | A    | 5626 | 5626 | 1 | G -> A       | 66          | SNP<br>(transition)   | 68.20%            | 2.80E-123 |
| Variants:<br>VaphiSt2_B_FDSW210055056<br>-1r | T    | 5626 | 5626 | 1 | G -> T       | 66          | SNP<br>(transversion) | 28.80%            | 3.60E-30  |
| Variants:<br>VaphiSt2_B_FDSW210055056<br>-1r | GG   | 5627 | 5628 | 2 | AT -> GG     | 66 -><br>67 | Substitution          | 25.4% -><br>25.8% | 3.30E-26  |
| Variants:<br>VaphiSt2_B_FDSW210055056<br>-1r | T    | 5632 | 5632 | 1 | A -> T       | 78          | SNP<br>(transversion) | 91.00%            | 5.20E-183 |
| Variants:<br>VaphiSt2_B_FDSW210055056<br>-1r | TATG | 5633 | 5636 | 4 | ATCA -> TATG | 74 -><br>78 | Substitution          | 64.1% -><br>68.9% | 1.20E-129 |
| Variants:<br>VaphiSt2_B_FDSW210055056<br>-1r | A    | 5637 | 5637 | 1 | T -> A       | 71          | SNP<br>(transversion) | 87.30%            | 7.40E-176 |



|                                       |    |      |      |   |              |       |                |          |           |  |
|---------------------------------------|----|------|------|---|--------------|-------|----------------|----------|-----------|--|
| Variants:                             |    |      |      |   |              |       |                |          |           |  |
| VaphiSt2_B_FDSW210055056              |    |      |      |   |              |       | SNP            |          |           |  |
| -1r                                   | A  | 5638 | 5638 | 1 | T -> A       | 73    | (transversion) | 72.60%   | 1.10E-152 |  |
| Variants:                             |    |      |      |   |              |       |                |          |           |  |
| VaphiSt2_B_FDSW210055056              |    |      |      |   |              | 97 -> |                | 63.5% -> |           |  |
| -1r                                   | AG | 5645 | 5646 | 2 | TC -> AG     | 104   | Substitution   | 68.0%    | 8.80E-177 |  |
|                                       |    |      |      |   |              |       | Deletion       |          |           |  |
|                                       |    |      |      |   |              |       | (tandem        |          |           |  |
| Variants: VaphiSt2_B_FDSW210055056-1r |    | 5648 | 5648 | 1 | (C)3 -> (C)2 | 119   | repeat)        | 56.30%   | 3.80E-61  |  |
| Variants:                             |    |      |      |   |              |       |                |          |           |  |
| VaphiSt2_B_FDSW210055056              |    |      |      |   |              |       | SNP            |          |           |  |
| -1r                                   | T  | 5653 | 5653 | 1 | G -> T       | 161   | (transversion) | 51.60%   | 1.60E-202 |  |
| Variants:                             |    |      |      |   |              |       |                |          |           |  |
| VaphiSt2_B_FDSW210055056              |    |      |      |   |              |       |                |          |           |  |
| -1r                                   | GC | 5658 | 5657 | 0 | #NAME?       | 184   | Insertion      | 46.20%   | 7.70E-202 |  |
