# Supplementary material for: The Development of Bacteriophage Resistance in Vibrio alginolyticus Depends on a Complex Metabolic Adaptation Strategy
Source: MDPI journal article supplement (doi:10.3390/v13040656), 2021-04-10

**Skliros et al., 2021. Figure S1. Growth kinetics of phage-resistant and phage susceptible strains in detail.** Growth (average,  $\pm$ SE) of Control (phage susceptible strains; black circle; n=6), VaAphrodite1 strains (phage resistant strains to bacteriophage Aphrodite1; white circle; n=9), VaphiSt2 strains (phage resistant strains to bacteriophage  $\phi$ St2; black triangle; n=9) and VaAres1 strains (phage resistant strains to bacteriophage Ares1; white triangle; n=9). Second diagram represents VaphiSt2 strains (phage resistant strains to bacteriophage  $\phi$ St2; n=3).

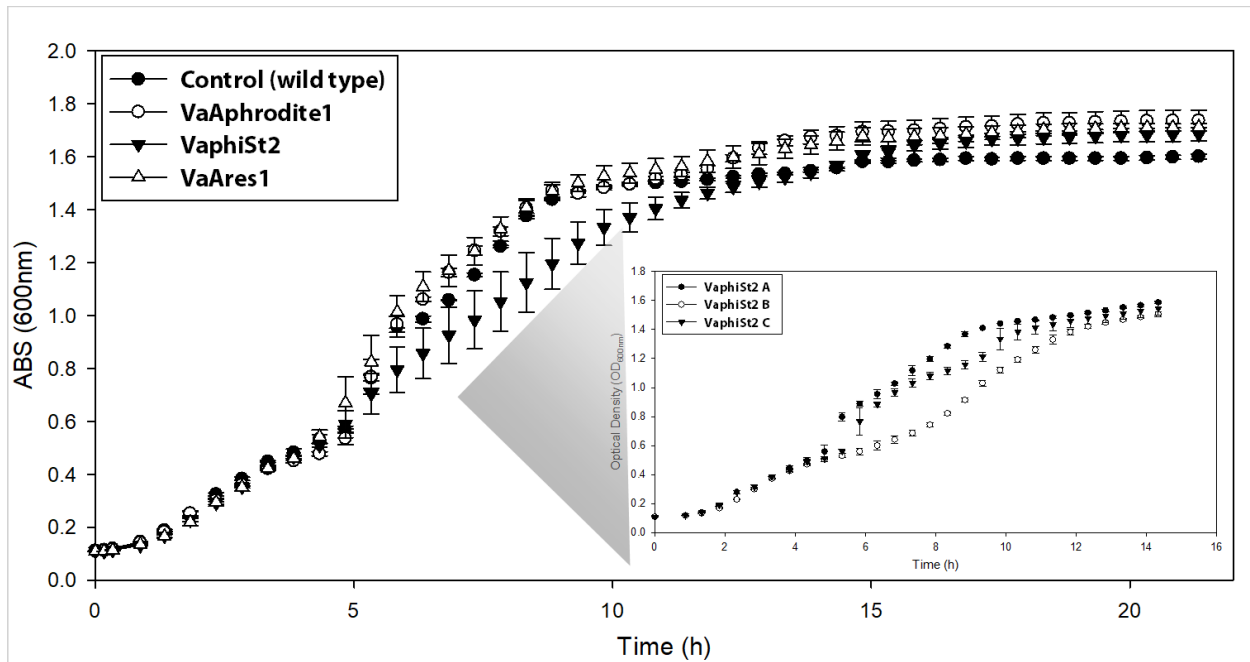

Supplement: s1 [file s1]
