# Supplementary material for: The Development of Bacteriophage Resistance in Vibrio alginolyticus Depends on a Complex Metabolic Adaptation Strategy
Source: MDPI journal article supplement (doi:10.3390/v13040656), 2021-04-10
Supplement: s1 [file s1]

## **Biological and molecular characterization of bacteriophage Aphrodite1**

Bacteriophage Aphrodite1 (**Figure1**) owns the accession number in genbank MG720308 and has been isolated from the aquatic area of North Euboea Greece. Capsid diameter corresponds to approximately  $105 \text{ nm} \pm 10.8 \text{ nm}$ . Not contractile tail length is  $144 \pm 10.6 \text{ nm}$  ( $n=6$ ). *In vitro* assay revealed that even after 10 hours (with MOI:100), is able to suppress bacterial cultures (**Figure 2**). 95 % of the phage particles are able to adsorb at 12 min and owns a long replication time of around 80 min (**Figure 3**).

Genome analysis revealed a large genome size of 237.722 bps and GC content of 43.4 %. Its genome is able to translate at least 198 potential protein products (**Table1**). Interestingly lacks the present of tRNAs. Taxonomy according to ICTV show that this bacteriophage belongs to genus *Aphroditevirus*. Genome orientation and transcriptional direction agrees with the most of the CDSs. Purine excess is strongly correlated with the leading transcriptional strand.

### **GenBank Record**

**Draft genome of Aphrodite1 MG720308 Skliros, D., Kalatzis, P.G., Katharios, P., Flemetakis, E., 2017**

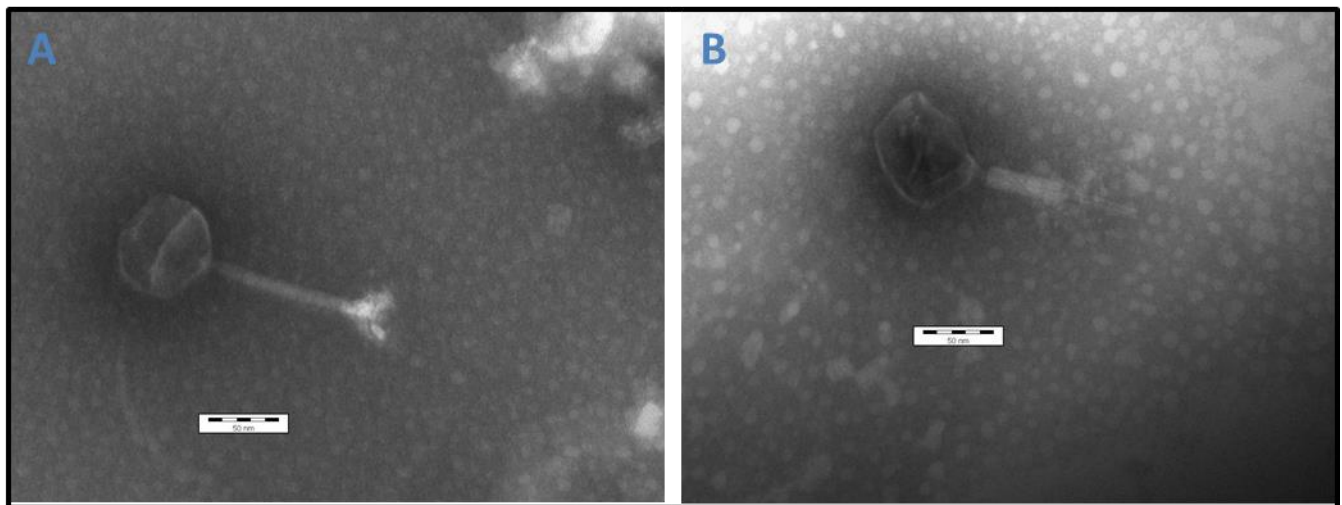

**Figure 1:** TEM image of bacteriophage Aphrodite1, a typical myovirus morphotype. Large capsid size is shown in A and the contracted tail in B.

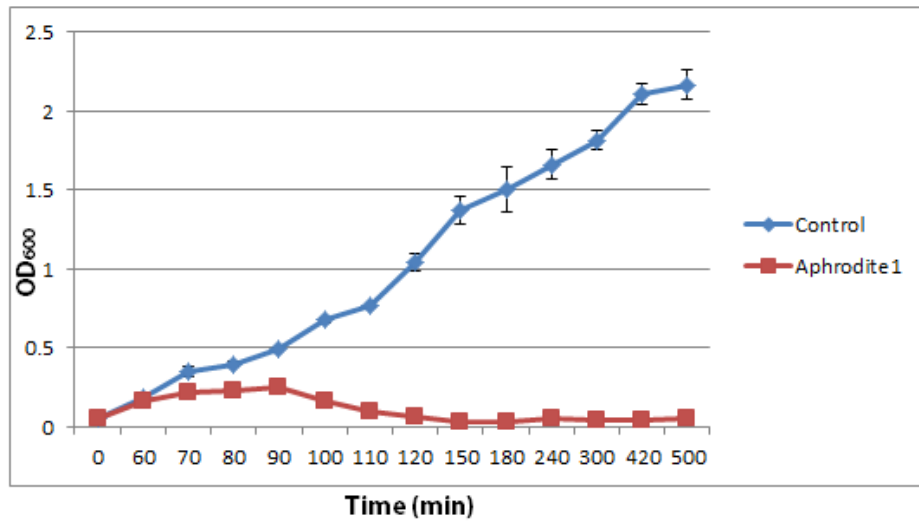

**Figure 2:** *In vitro* efficacy challenge with MOI:100 co-cultured with the main host *Vibrio alginolyticus* strain V1. Even after 10 hours the bacteria culture appears suppressed.

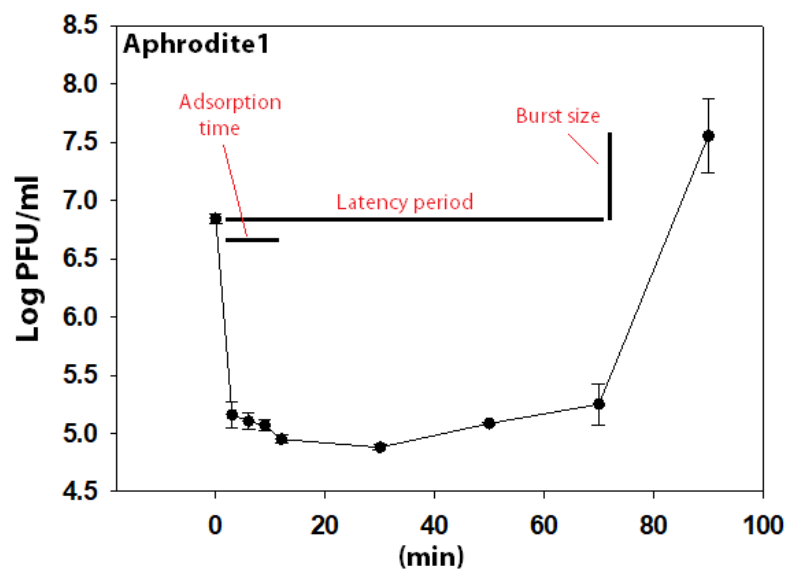

**Figure 3:** One-step growth curve revealed biological characteristics of the phage. Interestingly Aphrodite1 has a large latency period, which is approximately 80 min.



**Table 1.** Open reading frames of bacteriophage Aphrodite1.

| Name                                          | Length (nt) | Start | Finish | Orientation | Protein_id |
|-----------------------------------------------|-------------|-------|--------|-------------|------------|
| putative virion structural protein CDS        | 3           | 635   | 633    | forward     | AUR81025.1 |
| hypothetical protein CDS                      | 637         | 1149  | 513    | forward     | AUR81040.1 |
| hypothetical protein CDS                      | 1151        | 1885  | 735    | forward     | AUR81010.1 |
| hypothetical protein CDS                      | 1946        | 2449  | 504    | reverse     | AUR81043.1 |
| hypothetical protein CDS                      | 2513        | 3115  | 603    | forward     | AUR81029.1 |
| hypothetical protein CDS                      | 3096        | 3497  | 402    | forward     | AUR81070.1 |
| hypothetical protein CDS                      | 3593        | 4723  | 1131   | forward     | AUR80974.1 |
| hypothetical protein CDS                      | 4776        | 6950  | 2175   | reverse     | AUR80924.1 |
| endolysin CDS                                 | 7000        | 14055 | 7056   | reverse     | AUR80910.1 |
| hypothetical protein CDS                      | 14078       | 15685 | 1608   | forward     | AUR80938.1 |
| putative RNA polymerase beta subunit CDS      | 15688       | 20037 | 4350   | forward     | AUR80913.1 |
| hypothetical protein CDS                      | 20040       | 20894 | 855    | forward     | AUR80998.1 |
| hypothetical protein CDS                      | 20894       | 21055 | 162    | forward     | AUR81099.1 |
| hypothetical protein CDS                      | 21058       | 22548 | 1491   | forward     | AUR80945.1 |
| hypothetical protein CDS                      | 22565       | 23299 | 735    | forward     | AUR81009.1 |
| putative virion structural protein CDS        | 23292       | 24185 | 894    | forward     | AUR80994.1 |
| hypothetical protein CDS                      | 24297       | 24962 | 666    | forward     | AUR81019.1 |
| hypothetical protein CDS                      | 25076       | 25522 | 447    | forward     | AUR81057.1 |
| hypothetical protein CDS                      | 25671       | 26114 | 444    | forward     | AUR81060.1 |
| hypothetical protein CDS                      | 26185       | 26298 | 114    | forward     | AUR81105.1 |
| hypothetical protein CDS                      | 26295       | 26777 | 483    | forward     | AUR81050.1 |
| hypothetical protein CDS                      | 26780       | 27439 | 660    | forward     | AUR81020.1 |
| hypothetical protein CDS                      | 27436       | 27918 | 483    | forward     | AUR81049.1 |
| hypothetical protein CDS                      | 27915       | 28433 | 519    | forward     | AUR81038.1 |
| hypothetical protein CDS                      | 28472       | 28951 | 480    | forward     | AUR81051.1 |
| putative metal-dependent phosphohydrolase CDS | 29082       | 29870 | 789    | forward     | AUR81003.1 |
| thymidylate synthase CDS                      | 29872       | 30780 | 909    | forward     | AUR80992.1 |

|                                              |       |       |       |         |            |
|----------------------------------------------|-------|-------|-------|---------|------------|
| hypothetical protein CDS                     | 31362 | 31508 | 147   | forward | AUR81102.1 |
| hypothetical protein CDS                     | 32153 | 32869 | 717   | forward | AUR81015.1 |
| hypothetical protein CDS                     | 32873 | 33442 | 570   | forward | AUR81032.1 |
| hypothetical protein CDS                     | 33445 | 33834 | 390   | forward | AUR81075.1 |
| hypothetical protein CDS                     | 33831 | 34988 | 1158  | forward | AUR80972.1 |
| hypothetical protein CDS                     | 35218 | 35589 | 372   | forward | AUR81076.1 |
| hypothetical protein CDS                     | 35589 | 35888 | 300   | forward | AUR81093.1 |
| hypothetical protein CDS                     | 35976 | 36239 | 264   | forward | AUR81097.1 |
| putative tail tube protein CDS               | 36397 | 37296 | 900   | reverse | AUR80993.1 |
| hypothetical protein CDS                     | 37301 | 39436 | 2136  | reverse | AUR80926.1 |
| putative virion structural protein CDS       | 39582 | 40460 | 879   | forward | AUR80997.1 |
| hypothetical protein CDS                     | 40485 | 43067 | 2583  | forward | AUR80918.1 |
| putative virion structural protein CDS       | 43060 | 47826 | 4767  | forward | AUR80911.1 |
| hypothetical protein CDS                     | 47837 | 58426 | 10590 | forward | AUR80908.1 |
| Ig-like domain protein CDS                   | 58574 | 66220 | 7647  | forward | AUR80909.1 |
| hypothetical protein CDS                     | 66309 | 69524 | 3216  | forward | AUR80915.1 |
| thymidylate kinase CDS                       | 69708 | 70331 | 624   | reverse | AUR81027.1 |
| putative virion structural protein CDS       | 70390 | 71760 | 1371  | reverse | AUR80954.1 |
| putative virion structural protein CDS       | 71760 | 72605 | 846   | reverse | AUR80999.1 |
| hypothetical protein CDS                     | 72895 | 73488 | 594   | forward | AUR81031.1 |
| hypothetical protein CDS                     | 75147 | 75539 | 393   | forward | AUR81073.1 |
| hypothetical protein CDS                     | 76031 | 77035 | 1005  | forward | AUR80986.1 |
| hypothetical protein CDS                     | 77066 | 78085 | 1020  | forward | AUR80984.1 |
| hypothetical protein CDS                     | 79507 | 80265 | 759   | forward | AUR81006.1 |
| hypothetical protein CDS                     | 80593 | 81372 | 780   | forward | AUR81005.1 |
| hypothetical protein CDS                     | 81444 | 82622 | 1179  | forward | AUR80971.1 |
| lactose operon transcriptional activator CDS | 82610 | 83335 | 726   | forward | AUR81012.1 |
| Msm operon regulatory protein CDS            | 83328 | 84029 | 702   | forward | AUR81017.1 |
| chain A monomeric subunit of Tubz CDS        | 84528 | 85493 | 966   | forward | AUR80988.1 |
| hypothetical protein CDS                     | 85889 | 86344 | 456   | forward | AUR81055.1 |
| hypothetical protein CDS                     | 86860 | 87189 | 330   | forward | AUR81086.1 |
| hypothetical protein CDS                     | 87179 | 87505 | 327   | forward | AUR81088.1 |

|                                              |        |        |      |         |            |
|----------------------------------------------|--------|--------|------|---------|------------|
| hypothetical protein CDS                     | 87483  | 87812  | 330  | forward | AUR81085.1 |
| hypothetical protein CDS                     | 87842  | 88249  | 408  | forward | AUR81068.1 |
| hypothetical protein CDS                     | 88315  | 88752  | 438  | forward | AUR81062.1 |
| hypothetical protein CDS                     | 88811  | 90883  | 2073 | forward | AUR80930.1 |
| hypothetical protein CDS                     | 90919  | 92025  | 1107 | reverse | AUR80977.1 |
| hypothetical protein CDS                     | 92248  | 94314  | 2067 | forward | AUR80931.1 |
| putative DNA helicase CDS                    | 94409  | 95896  | 1488 | forward | AUR80946.1 |
| hypothetical protein CDS                     | 96221  | 96409  | 189  | forward | AUR81098.1 |
| hypothetical protein CDS                     | 96409  | 97065  | 657  | forward | AUR81021.1 |
| hypothetical protein CDS                     | 97091  | 97567  | 477  | forward | AUR81052.1 |
| hypothetical protein CDS                     | 97641  | 97769  | 129  | forward | AUR81104.1 |
| putative virion structural protein CDS       | 97832  | 98254  | 423  | forward | AUR81064.1 |
| hypothetical protein CDS                     | 98235  | 99122  | 888  | forward | AUR80995.1 |
| hypothetical protein CDS                     | 99144  | 100268 | 1125 | forward | AUR80975.1 |
| hypothetical protein CDS                     | 100265 | 101062 | 798  | forward | AUR81002.1 |
| hypothetical protein CDS                     | 101136 | 101858 | 723  | forward | AUR81014.1 |
| hypothetical protein CDS                     | 101972 | 103546 | 1575 | forward | AUR80940.1 |
| hypothetical protein CDS                     | 103597 | 105078 | 1482 | forward | AUR80947.1 |
| hypothetical protein CDS                     | 105165 | 106580 | 1416 | forward | AUR80952.1 |
| hypothetical protein CDS                     | 106647 | 107273 | 627  | forward | AUR81026.1 |
| hypothetical protein CDS                     | 107326 | 107646 | 321  | reverse | AUR81090.1 |
| hypothetical protein CDS                     | 107742 | 109844 | 2103 | forward | AUR80928.1 |
| DNA-directer RNA polymerase beta subunit CDS | 109822 | 111807 | 1986 | forward | AUR80932.1 |
| putative helicase CDS                        | 111930 | 113348 | 1419 | forward | AUR80951.1 |
| hypothetical protein CDS                     | 113415 | 113765 | 351  | forward | AUR81082.1 |
| hypothetical protein CDS                     | 113770 | 114186 | 417  | forward | AUR81065.1 |
| hypothetical protein CDS                     | 114159 | 114566 | 408  | forward | AUR81067.1 |
| hypothetical protein CDS                     | 114579 | 115019 | 441  | forward | AUR81061.1 |
| hypothetical protein CDS                     | 115192 | 116490 | 1299 | reverse | AUR80959.1 |
| putative virion structural protein CDS       | 116465 | 117391 | 927  | reverse | AUR80990.1 |
| hypothetical protein CDS                     | 117421 | 118146 | 726  | forward | AUR81011.1 |
| hypothetical protein CDS                     | 118139 | 119761 | 1623 | forward | AUR80937.1 |

|                                        |        |        |      |         |            |
|----------------------------------------|--------|--------|------|---------|------------|
| hypothetical protein CDS               | 119818 | 120216 | 399  | forward | AUR81072.1 |
| hypothetical protein CDS               | 120293 | 120850 | 558  | forward | AUR81035.1 |
| hypothetical protein CDS               | 121002 | 121361 | 360  | forward | AUR81079.1 |
| putative DNA polymerase CDS            | 121424 | 123190 | 1767 | reverse | AUR80935.1 |
| putative virion structural protein CDS | 123274 | 124602 | 1329 | forward | AUR80958.1 |
| hypothetical protein CDS               | 124604 | 125014 | 411  | forward | AUR81066.1 |
| tail length tape-measure protein CDS   | 125025 | 126488 | 1464 | forward | AUR80948.1 |
| hypothetical protein CDS               | 126485 | 127207 | 723  | forward | AUR81013.1 |
| hypothetical protein CDS               | 127254 | 130193 | 2940 | reverse | AUR80916.1 |
| putative virion structural protein CDS | 130175 | 131218 | 1044 | reverse | AUR80982.1 |
| capsid and scaffold protein CDS        | 131254 | 132375 | 1122 | forward | AUR80976.1 |
| putative virion structural protein CDS | 132375 | 133256 | 882  | forward | AUR80996.1 |
| hypothetical protein CDS               | 133268 | 133777 | 510  | forward | AUR81041.1 |
| hypothetical protein CDS               | 133770 | 135035 | 1266 | forward | AUR80963.1 |
| hypothetical protein CDS               | 135038 | 135991 | 954  | forward | AUR80989.1 |
| hypothetical protein CDS               | 136049 | 137332 | 1284 | forward | AUR80961.1 |
| hypothetical protein CDS               | 137406 | 138596 | 1191 | forward | AUR80969.1 |
| hypothetical protein CDS               | 138614 | 139813 | 1200 | forward | AUR80968.1 |
| hypothetical protein CDS               | 139918 | 141168 | 1251 | forward | AUR80964.1 |
| hypothetical protein CDS               | 141215 | 142489 | 1275 | forward | AUR80962.1 |
| hypothetical protein CDS               | 142614 | 143852 | 1239 | forward | AUR80966.1 |
| hypothetical protein CDS               | 143943 | 145031 | 1089 | forward | AUR80979.1 |
| hypothetical protein CDS               | 145041 | 146453 | 1413 | forward | AUR80953.1 |
| putative virion structural protein CDS | 146523 | 148127 | 1605 | forward | AUR80939.1 |
| putative virion structural protein CDS | 148131 | 149420 | 1290 | forward | AUR80960.1 |
| hypothetical protein CDS               | 149422 | 150123 | 702  | forward | AUR81016.1 |
| putative virion structural protein CDS | 150125 | 151456 | 1332 | forward | AUR80956.1 |
| hypothetical protein CDS               | 151576 | 153015 | 1440 | forward | AUR80949.1 |
| hypothetical protein CDS               | 153072 | 153470 | 399  | forward | AUR81071.1 |
| hypothetical protein CDS               | 153686 | 153997 | 312  | forward | AUR81091.1 |
| hypothetical protein CDS               | 154235 | 155074 | 840  | forward | AUR81000.1 |
| hypothetical protein CDS               | 155071 | 155568 | 498  | forward | AUR81045.1 |

|                                                 |        |        |      |         |            |
|-------------------------------------------------|--------|--------|------|---------|------------|
| hypothetical protein CDS                        | 155565 | 156071 | 507  | forward | AUR81042.1 |
| hypothetical protein CDS                        | 156086 | 156490 | 405  | forward | AUR81069.1 |
| hypothetical protein CDS                        | 156487 | 156945 | 459  | forward | AUR81054.1 |
| hypothetical protein CDS                        | 157360 | 159183 | 1824 | forward | AUR80934.1 |
| hypothetical protein CDS                        | 159188 | 159538 | 351  | forward | AUR81081.1 |
| hypothetical protein CDS                        | 159600 | 159926 | 327  | forward | AUR81087.1 |
| DNA helicase CDS                                | 159998 | 161536 | 1539 | reverse | AUR80942.1 |
| hypothetical protein CDS                        | 161582 | 162148 | 567  | forward | AUR81033.1 |
| capsid and scaffold protein CDS                 | 162248 | 164443 | 2196 | forward | AUR80923.1 |
| hypothetical protein CDS                        | 164625 | 165695 | 1071 | forward | AUR80980.1 |
| hypothetical protein CDS                        | 165739 | 167412 | 1674 | forward | AUR80936.1 |
| hypothetical protein CDS                        | 167409 | 169892 | 2484 | forward | AUR80920.1 |
| hypothetical protein CDS                        | 169952 | 170515 | 564  | forward | AUR81034.1 |
| hypothetical protein CDS                        | 170519 | 171523 | 1005 | forward | AUR80985.1 |
| hypothetical protein CDS                        | 171520 | 172269 | 750  | forward | AUR81008.1 |
| hypothetical protein CDS                        | 172420 | 172863 | 444  | forward | AUR81059.1 |
| hypothetical protein CDS                        | 172948 | 173313 | 366  | forward | AUR81078.1 |
| hypothetical protein CDS                        | 173363 | 176269 | 2907 | reverse | AUR80917.1 |
| hypothetical protein CDS                        | 176290 | 178401 | 2112 | forward | AUR80927.1 |
| putative virion structural protein CDS          | 178461 | 179375 | 915  | forward | AUR80991.1 |
| hypothetical protein CDS                        | 179441 | 179977 | 537  | forward | AUR81036.1 |
| hypothetical protein CDS                        | 179958 | 180311 | 354  | forward | AUR81080.1 |
| hypothetical protein CDS                        | 180359 | 180505 | 147  | reverse | AUR81101.1 |
| hypothetical protein CDS                        | 180801 | 181190 | 390  | reverse | AUR81074.1 |
| hypothetical protein CDS                        | 181194 | 182429 | 1236 | reverse | AUR80967.1 |
| tail fiber protein CDS                          | 182508 | 184649 | 2142 | forward | AUR80925.1 |
| minor tail protein CDS                          | 184770 | 188039 | 3270 | forward | AUR80914.1 |
| minor tail protein CDS                          | 188078 | 190288 | 2211 | forward | AUR80922.1 |
| hypothetical protein CDS                        | 190290 | 192800 | 2511 | forward | AUR80919.1 |
| phage baseplate protein CDS                     | 192849 | 193901 | 1053 | reverse | AUR80981.1 |
| DNA double-strand break repair Rad50 ATPase CDS | 193952 | 196429 | 2478 | forward | AUR80921.1 |
| hypothetical protein CDS                        | 196520 | 196792 | 273  | forward | AUR81096.1 |



|                                            |        |        |      |         |            |
|--------------------------------------------|--------|--------|------|---------|------------|
| hypothetical protein CDS                   | 196853 | 197296 | 444  | forward | AUR81058.1 |
| hypothetical protein CDS                   | 197306 | 197941 | 636  | forward | AUR81024.1 |
| DNA ligase CDS                             | 197928 | 199889 | 1962 | forward | AUR80933.1 |
| hypothetical protein CDS                   | 199920 | 200222 | 303  | forward | AUR81092.1 |
| hypothetical protein CDS                   | 200250 | 201494 | 1245 | forward | AUR80965.1 |
| hypothetical protein CDS                   | 201552 | 202034 | 483  | forward | AUR81048.1 |
| hypothetical protein CDS                   | 202207 | 203175 | 969  | forward | AUR80987.1 |
| ribonuclease HI CDS                        | 203200 | 203724 | 525  | forward | AUR81037.1 |
| hypothetical protein CDS                   | 203721 | 204041 | 321  | forward | AUR81089.1 |
| hypothetical protein CDS                   | 204104 | 204595 | 492  | forward | AUR81047.1 |
| hypothetical protein CDS                   | 204605 | 205249 | 645  | forward | AUR81022.1 |
| hypothetical protein CDS                   | 205252 | 206397 | 1146 | forward | AUR80973.1 |
| heat shock protein 60 family chaperone CDS | 206470 | 208029 | 1560 | forward | AUR80941.1 |
| hypothetical protein CDS                   | 208130 | 208279 | 150  | forward | AUR81100.1 |
| hypothetical protein CDS                   | 208937 | 209065 | 129  | forward | AUR81103.1 |
| thymidine kinase CDS                       | 209195 | 209791 | 597  | forward | AUR81030.1 |
| hypothetical protein CDS                   | 209850 | 211034 | 1185 | forward | AUR80970.1 |
| hypothetical protein CDS                   | 211108 | 215631 | 4524 | forward | AUR80912.1 |
| hypothetical protein CDS                   | 215759 | 216511 | 753  | forward | AUR81007.1 |
| hypothetical protein CDS                   | 216559 | 217578 | 1020 | forward | AUR80983.1 |
| hypothetical protein CDS                   | 217582 | 217914 | 333  | forward | AUR81083.1 |
| hypothetical protein CDS                   | 218005 | 218457 | 453  | forward | AUR81056.1 |
| hypothetical protein CDS                   | 218505 | 219002 | 498  | forward | AUR81044.1 |
| hypothetical protein CDS                   | 219004 | 219474 | 471  | forward | AUR81053.1 |
| hypothetical protein CDS                   | 219494 | 219985 | 492  | forward | AUR81046.1 |
| DNA helicase CDS                           | 220048 | 222129 | 2082 | reverse | AUR80929.1 |
| hypothetical protein CDS                   | 222177 | 223532 | 1356 | forward | AUR80955.1 |
| hypothetical protein CDS                   | 223585 | 223875 | 291  | forward | AUR81095.1 |
| hypothetical protein CDS                   | 224771 | 226294 | 1524 | forward | AUR80944.1 |
| hypothetical protein CDS                   | 226342 | 227433 | 1092 | forward | AUR80978.1 |
| hypothetical protein CDS                   | 227423 | 227719 | 297  | forward | AUR81094.1 |
| hypothetical protein CDS                   | 227776 | 228288 | 513  | forward | AUR81039.1 |

|                                        |        |        |      |         |            |
|----------------------------------------|--------|--------|------|---------|------------|
| hypothetical protein CDS               | 228295 | 229074 | 780  | forward | AUR81004.1 |
| hypothetical protein CDS               | 229074 | 229748 | 675  | forward | AUR81018.1 |
| hypothetical protein CDS               | 229760 | 230377 | 618  | forward | AUR81028.1 |
| hypothetical protein CDS               | 230367 | 230696 | 330  | forward | AUR81084.1 |
| hypothetical protein CDS               | 230758 | 231393 | 636  | reverse | AUR81023.1 |
| putative virion structural protein CDS | 231386 | 232714 | 1329 | reverse | AUR80957.1 |
| hypothetical protein CDS               | 232755 | 233186 | 432  | forward | AUR81063.1 |
| hypothetical protein CDS               | 233279 | 234811 | 1533 | forward | AUR80943.1 |
| hypothetical protein CDS               | 234850 | 235659 | 810  | reverse | AUR81001.1 |
| hypothetical protein CDS               | 235716 | 237152 | 1437 | forward | AUR80950.1 |
| hypothetical protein CDS               | 237212 | 237577 | 366  | forward | AUR81077.1 |

---
