# Supplementary material for: The Development of Bacteriophage Resistance in Vibrio alginolyticus Depends on a Complex Metabolic Adaptation Strategy
Source: MDPI journal article supplement (doi:10.3390/v13040656), 2021-04-10
Supplement: s1 [file s1]

## **Biological and molecular characterization of bacteriophage Ares1**

Bacteriophage Ares1 (**Figure 1**) owns the accession number in genbank MG720309 and has been isolated from the aquatic area of South Attika, Greece. Capsid diameter corresponds to approximately  $\sim 49 \pm 6.8$  (n=5) nm. Not contractile tail length is  $160 \pm 14$  nm. 95 % of the phage particles are able to adsorb at 6 min (**Figure 3**) and owns a latent period of 30 min (**Figure 3**). *In vitro* assay revealed that even after 7 hours (with MOI:100), is able to suppress bacterial culture (**Figure 2**).

Genome analysis revealed a genome size of 80500 bps and GC content of 45.1 %. Its genome is able to translate at least 119 ORFs (**Table 1**). TEM images revealed a typical siphophage morphotype with a strong lytic activity (**Figure 4**). ICTV has not yet classified this particular virus to a genus. In silico annotation process showed similarity with siphovirus VHS1, thus enabling us to proceed to a whole genome alignment representation, utilizing MAUVE aligner software. Genome orientation and transcriptional direction agrees with the most of the CDSs. Purine excess is strongly correlated with the leading transcriptional strand.

### **GenBank Record**

**Draft genome of Ares1 MG720309 Skliros, D., Kalatzis, P.G., Katharios, P., Flemetakis, E., 2017**

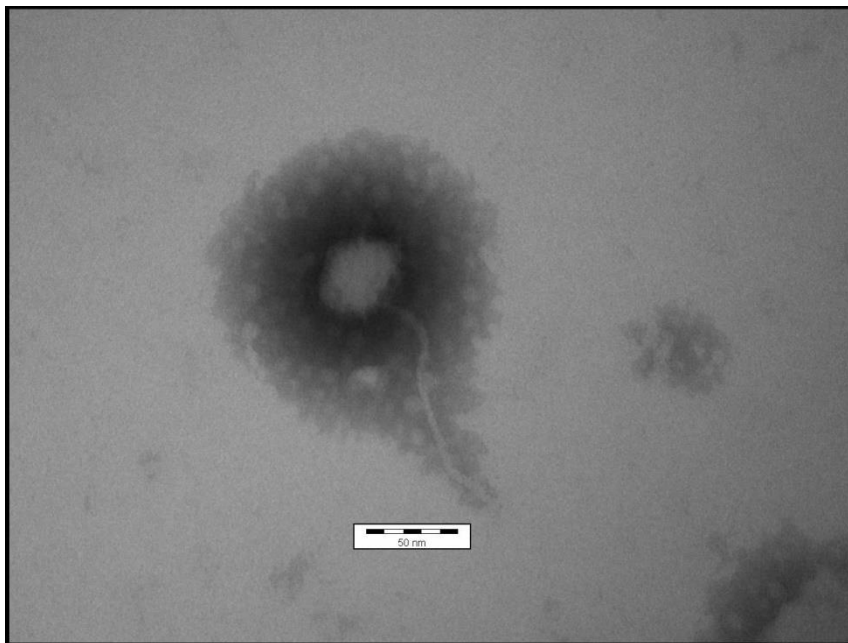

**Figure 1:** TEM image of bacteriophage Ares1 revealing a long tail structure, typical of siphovirus morphotype.

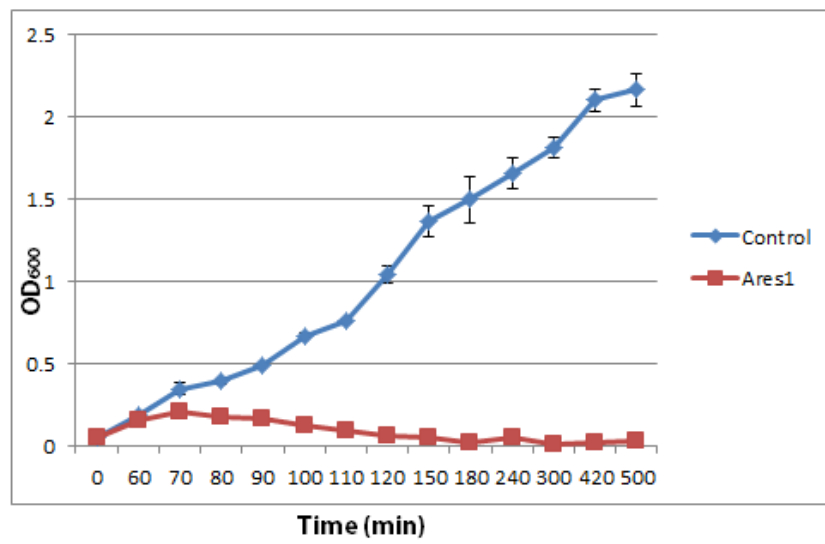

**Figure 2:** *In vitro* efficacy challenge with MOI:100 of bacteriophage Ares1 co-cultured with the main host *Vibrio alginolyticus* strain V1. Even after 7 hours the bacteria culture appears suppressed.

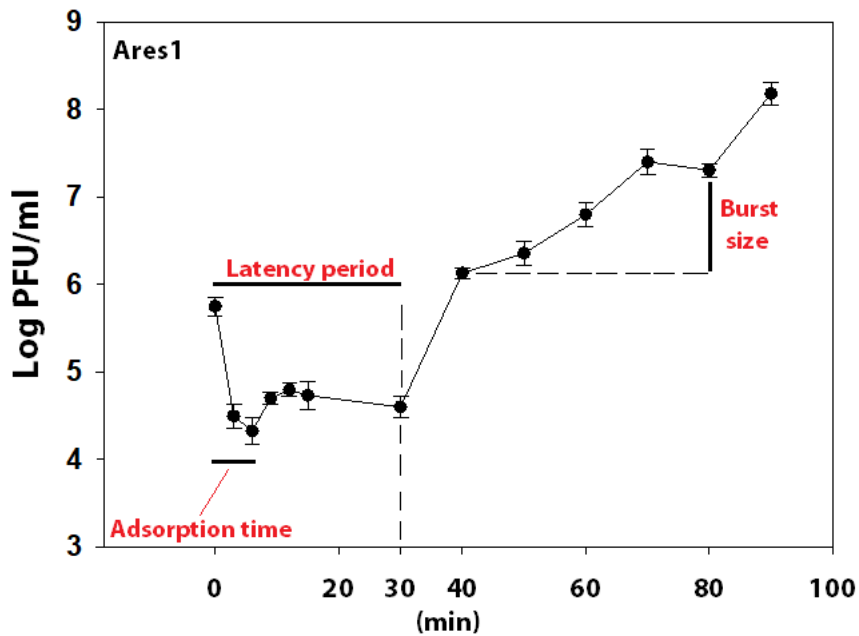

**Figure 3:** Two-step growth curve revealed biological characteristics of the bacteriophage Ares1.

**Table 1.** Open reading frames of bacteriophage Ares1.

---

| Name                                 | Length (nt) | Start | Finish | Orientation | Protein_id |
|--------------------------------------|-------------|-------|--------|-------------|------------|
| hypothetical protein CDS             | 115         | 459   | 345    | forward     | AUR81185.1 |
| hypothetical protein CDS             | 469         | 732   | 264    | forward     | AUR81208.1 |
| hypothetical protein CDS             | 870         | 1160  | 291    | forward     | AUR81199.1 |
| hypothetical protein CDS             | 1170        | 1472  | 303    | forward     | AUR81196.1 |
| hypothetical protein CDS             | 1484        | 2008  | 525    | forward     | AUR81149.1 |
| hypothetical protein CDS             | 1996        | 2280  | 285    | forward     | AUR81201.1 |
| hypothetical protein CDS             | 2350        | 3138  | 789    | forward     | AUR81135.1 |
| hypothetical protein CDS             | 3221        | 5170  | 1950   | forward     | AUR81110.1 |
| hypothetical protein CDS             | 5246        | 5587  | 342    | forward     | AUR81186.1 |
| hypothetical protein CDS             | 5719        | 6330  | 612    | forward     | AUR81141.1 |
| hypothetical protein CDS             | 6333        | 7520  | 1188   | forward     | AUR81120.1 |
| major capsid protein CDS             | 7606        | 8556  | 951    | forward     | AUR81128.1 |
| hypothetical protein CDS             | 8632        | 8925  | 294    | forward     | AUR81198.1 |
| hypothetical protein CDS             | 8937        | 9575  | 639    | forward     | AUR81140.1 |
| hypothetical protein CDS             | 9572        | 10036 | 465    | forward     | AUR81158.1 |
| hypothetical protein CDS             | 10033       | 10524 | 492    | forward     | AUR81155.1 |
| hypothetical protein CDS             | 10578       | 11372 | 795    | forward     | AUR81134.1 |
| hypothetical protein CDS             | 11462       | 11884 | 423    | forward     | AUR81169.1 |
| hypothetical protein CDS             | 11962       | 12084 | 123    | forward     | AUR81224.1 |
| tail length tape measure protein CDS | 12092       | 16231 | 4140   | forward     | AUR81106.1 |
| hypothetical protein CDS             | 16228       | 16614 | 387    | forward     | AUR81174.1 |
| hypothetical protein CDS             | 16625       | 17614 | 990    | forward     | AUR81125.1 |
| hypothetical protein CDS             | 17626       | 18504 | 879    | forward     | AUR81130.1 |
| hypothetical protein CDS             | 18522       | 19820 | 1299   | forward     | AUR81118.1 |
| hypothetical protein CDS             | 19823       | 20347 | 525    | forward     | AUR81150.1 |
| hypothetical protein CDS             | 20348       | 20650 | 303    | forward     | AUR81197.1 |
| hypothetical protein CDS             | 20647       | 20874 | 228    | forward     | AUR81214.1 |
| hypothetical protein CDS             | 20864       | 21298 | 435    | forward     | AUR81167.1 |

---

|                                           |       |       |      |         |            |
|-------------------------------------------|-------|-------|------|---------|------------|
| hypothetical protein CDS                  | 21301 | 21840 | 540  | forward | AUR81148.1 |
| AAA family ATPase CDS                     | 21964 | 23184 | 1221 | forward | AUR81119.1 |
| hypothetical protein CDS                  | 23576 | 25165 | 1590 | forward | AUR81113.1 |
| hypothetical protein CDS                  | 25165 | 25758 | 594  | forward | AUR81142.1 |
| replicative DNA helicase CDS              | 25743 | 27191 | 1449 | forward | AUR81114.1 |
| hypothetical protein CDS                  | 27263 | 27847 | 585  | forward | AUR81143.1 |
| hypothetical protein CDS                  | 27840 | 28826 | 987  | forward | AUR81126.1 |
| hypothetical protein CDS                  | 28837 | 29763 | 927  | forward | AUR81129.1 |
| putative DNA helicase CDS                 | 29811 | 31238 | 1428 | forward | AUR81116.1 |
| hypothetical protein CDS                  | 31334 | 31789 | 456  | forward | AUR81160.1 |
| hypothetical protein CDS                  | 31794 | 32183 | 390  | forward | AUR81173.1 |
| RecA protein CDS                          | 32196 | 33272 | 1077 | forward | AUR81122.1 |
| hypothetical protein CDS                  | 33253 | 33666 | 414  | forward | AUR81172.1 |
| hypothetical protein CDS                  | 33656 | 34651 | 996  | forward | AUR81124.1 |
| hypothetical protein CDS                  | 34652 | 35212 | 561  | forward | AUR81145.1 |
| hypothetical protein CDS                  | 35314 | 36288 | 975  | forward | AUR81127.1 |
| hypothetical protein CDS                  | 36351 | 36641 | 291  | forward | AUR81200.1 |
| hypothetical protein CDS                  | 36667 | 37410 | 744  | forward | AUR81136.1 |
| hypothetical protein CDS                  | 37489 | 38220 | 732  | forward | AUR81137.1 |
| hypothetical protein CDS                  | 38231 | 39040 | 810  | forward | AUR81133.1 |
| hypothetical protein CDS                  | 39027 | 41003 | 1977 | forward | AUR81109.1 |
| hypothetical protein CDS                  | 41015 | 41257 | 243  | forward | AUR81210.1 |
| hypothetical protein CDS                  | 41358 | 41630 | 273  | forward | AUR81204.1 |
| hypothetical protein CDS                  | 41669 | 41935 | 267  | forward | AUR81207.1 |
| hypothetical protein CDS                  | 41925 | 42374 | 450  | forward | AUR81164.1 |
| pyruvate phosphate dikinase CDS           | 42409 | 44484 | 2076 | forward | AUR81108.1 |
| hypothetical protein CDS                  | 44489 | 44971 | 483  | forward | AUR81156.1 |
| putative protein-tyrosine phosphatase CDS | 44971 | 45519 | 549  | forward | AUR81147.1 |
| hypothetical protein CDS                  | 45541 | 46554 | 1014 | forward | AUR81123.1 |
| hypothetical protein CDS                  | 46565 | 47422 | 858  | forward | AUR81131.1 |
| DNA polymerase I CDS                      | 47422 | 49779 | 2358 | forward | AUR81107.1 |
| portal protein CDS                        | 49781 | 51646 | 1866 | forward | AUR81111.1 |

|                                   |       |       |      |         |            |
|-----------------------------------|-------|-------|------|---------|------------|
| hypothetical protein CDS          | 51643 | 52725 | 1083 | forward | AUR81121.1 |
| adenine DNA methyltransferase CDS | 52731 | 53381 | 651  | forward | AUR81139.1 |
| hypothetical protein CDS          | 53470 | 53973 | 504  | forward | AUR81154.1 |
| hypothetical protein CDS          | 53982 | 54437 | 456  | forward | AUR81161.1 |
| putative DNA polymerase I CDS     | 54562 | 54930 | 369  | forward | AUR81179.1 |
| hypothetical protein CDS          | 54932 | 55126 | 195  | forward | AUR81218.1 |
| hypothetical protein CDS          | 55101 | 55556 | 456  | forward | AUR81162.1 |
| hypothetical protein CDS          | 55639 | 55782 | 144  | forward | AUR81221.1 |
| hypothetical protein CDS          | 55784 | 56233 | 450  | forward | AUR81165.1 |
| hypothetical protein CDS          | 56236 | 56520 | 285  | forward | AUR81202.1 |
| hypothetical protein CDS          | 56526 | 56831 | 306  | forward | AUR81194.1 |
| hypothetical protein CDS          | 56916 | 57224 | 309  | forward | AUR81193.1 |
| hypothetical protein CDS          | 57275 | 58627 | 1353 | forward | AUR81117.1 |
| hypothetical protein CDS          | 58593 | 58877 | 285  | forward | AUR81203.1 |
| hypothetical protein CDS          | 58886 | 59338 | 453  | forward | AUR81163.1 |
| hypothetical protein CDS          | 59331 | 59843 | 513  | forward | AUR81151.1 |
| hypothetical protein CDS          | 59853 | 60086 | 234  | forward | AUR81213.1 |
| hypothetical protein CDS          | 60153 | 60284 | 132  | forward | AUR81223.1 |
| hypothetical protein CDS          | 60755 | 61198 | 444  | forward | AUR81166.1 |
| hypothetical protein CDS          | 61195 | 61383 | 189  | forward | AUR81220.1 |
| hypothetical protein CDS          | 61370 | 61792 | 423  | forward | AUR81170.1 |
| hypothetical protein CDS          | 61789 | 62514 | 726  | forward | AUR81138.1 |
| hypothetical protein CDS          | 62501 | 63319 | 819  | forward | AUR81132.1 |
| hypothetical protein CDS          | 63322 | 63645 | 324  | forward | AUR81191.1 |
| hypothetical protein CDS          | 63780 | 64286 | 507  | forward | AUR81153.1 |
| hypothetical protein CDS          | 64349 | 64918 | 570  | forward | AUR81144.1 |
| hypothetical protein CDS          | 64955 | 65197 | 243  | forward | AUR81211.1 |
| hypothetical protein CDS          | 65317 | 65511 | 195  | forward | AUR81219.1 |
| hypothetical protein CDS          | 65526 | 65909 | 384  | forward | AUR81176.1 |
| hypothetical protein CDS          | 65960 | 66292 | 333  | forward | AUR81190.1 |
| hypothetical protein CDS          | 66305 | 66673 | 369  | forward | AUR81180.1 |
| hypothetical protein CDS          | 66673 | 67182 | 510  | forward | AUR81152.1 |

|                          |       |       |      |         |            |
|--------------------------|-------|-------|------|---------|------------|
| hypothetical protein CDS | 67179 | 67595 | 417  | forward | AUR81171.1 |
| hypothetical protein CDS | 67651 | 68016 | 366  | forward | AUR81182.1 |
| hypothetical protein CDS | 68037 | 68420 | 384  | forward | AUR81177.1 |
| hypothetical protein CDS | 68420 | 68791 | 372  | forward | AUR81178.1 |
| hypothetical protein CDS | 68846 | 69214 | 369  | forward | AUR81181.1 |
| hypothetical protein CDS | 69269 | 69604 | 336  | forward | AUR81189.1 |
| hypothetical protein CDS | 69660 | 70121 | 462  | forward | AUR81159.1 |
| hypothetical protein CDS | 70108 | 70464 | 357  | forward | AUR81184.1 |
| hypothetical protein CDS | 70600 | 70800 | 201  | forward | AUR81215.1 |
| hypothetical protein CDS | 70864 | 71202 | 339  | forward | AUR81187.1 |
| hypothetical protein CDS | 71205 | 71510 | 306  | forward | AUR81195.1 |
| hypothetical protein CDS | 71514 | 71750 | 237  | forward | AUR81212.1 |
| hypothetical protein CDS | 71879 | 72076 | 198  | forward | AUR81217.1 |
| hypothetical protein CDS | 72079 | 72222 | 144  | forward | AUR81222.1 |
| hypothetical protein CDS | 72340 | 72540 | 201  | forward | AUR81216.1 |
| hypothetical protein CDS | 72590 | 72859 | 270  | forward | AUR81205.1 |
| hypothetical protein CDS | 72859 | 73128 | 270  | forward | AUR81206.1 |
| hypothetical protein CDS | 73125 | 74561 | 1437 | forward | AUR81115.1 |
| hypothetical protein CDS | 74654 | 75214 | 561  | forward | AUR81146.1 |
| hypothetical protein CDS | 75350 | 77209 | 1860 | forward | AUR81112.1 |
| hypothetical protein CDS | 77374 | 77688 | 315  | forward | AUR81192.1 |
| hypothetical protein CDS | 77776 | 78138 | 363  | forward | AUR81183.1 |
| hypothetical protein CDS | 78188 | 78436 | 249  | forward | AUR81209.1 |
| hypothetical protein CDS | 78438 | 78824 | 387  | forward | AUR81175.1 |
| hypothetical protein CDS | 78821 | 79252 | 432  | forward | AUR81168.1 |
| hypothetical protein CDS | 79323 | 79661 | 339  | forward | AUR81188.1 |
| hypothetical protein CDS | 79674 | 80150 | 477  | forward | AUR81157.1 |

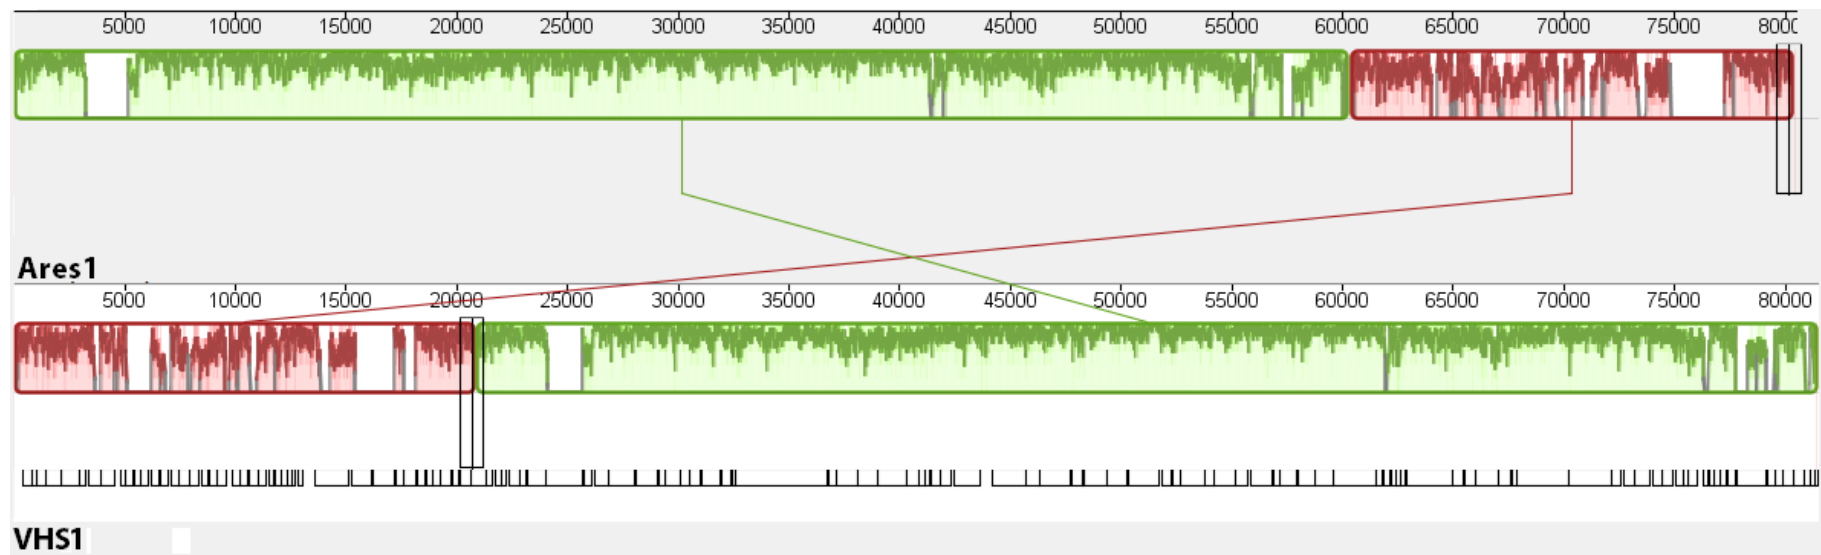

**Figure 4:** Whole genome multiple alignments with software MAUVE of Ares1 and phylogenetically close bacteriophage VHS1. Same color areas represent genomic synteny and diagrams inside areas represent percentage of synteny. White color represents unique genomic areas.
